# Supplementary material
Source: PubMed Central journal article supplement (PMC3148200)

## **Nickel-Catalyzed Coupling of Alkenes, Aldehydes, and Silyl Triflates**

Ng, S.-S.; Ho, C.-Y.; Jamison, T. F. \*

Department of Chemistry, Massachusetts Institute of Technology, Cambridge, MA 02139

### **Supporting Information**

Experimental Procedures, Analytical and Spectroscopic Data for Compounds **1a** – **5b**.

Pages S2 – S50

$^1\text{H}$  and  $^{13}\text{C}$  NMR spectra for compounds **1a** – **5b**.

Pages S51 – S164

## General Information.

Unless otherwise noted, all reactions were performed under an oxygen-free atmosphere of nitrogen or argon with rigid exclusion of moisture from reagents and glassware. Tetrahydrofuran was distilled from a blue solution of sodium benzophenone ketyl. Dichloromethane and toluene was distilled from calcium hydride. Aromatic aldehydes were purchased from Aldrich Chemical Co. and used as received. Other aldehydes were distilled and saturated with nitrogen before use. Bis(cyclooctadienyl)nickel(0) ( $\text{Ni}(\text{cod})_2$ ) and tris-(*o*-methoxyphenyl)-phosphine and triphenylphosphine were purchased from Strem Chemicals, Inc., stored under nitrogen atmosphere and used without further purification. Ethylene was purchased from BOC Gases and used as received. 1-octene was purchased from Alfa Aesar and used as received. All other alkenes were purchased from Aldrich Chemical Co. and used as received. Dicyclohexylphenylphosphine and ethyldiphenylphosphinite were purchased from Aldrich Chemical Co., stored under nitrogen atmosphere and used without further purification. Triethylsilyltrifluoromethanesulfonate (TESOTf) and trimethylsilyltrifluoromethanesulfonate (TMSOTf) were purchased from Aldrich Chemical Co. and were distilled over calcium hydride before use. Tert-butyldimethylsilyltrifluoromethanesulfonate (TBSOTf) was purchased from Alfa Aesar and was distilled over calcium hydride before use.

Analytical thin layer chromatography (TLC) was performed using EM Science silica gel 60 F<sub>254</sub> plates. The developed chromatogram was analyzed by UV lamp (254 nm), ethanolic phosphomolybdic acid (PMA) or potassium permanganate ( $\text{KMnO}_4$ ). Liquid chromatography was performed using a forced flow (flash chromatography) of the indicated solvent system on Silicycle Silica Gel (230 – 400 mesh).  $^1\text{H}$  and  $^{13}\text{C}$  NMR spectra were recorded on Varian 300 MHz, Varian 500 MHz or Bruker 400 MHz spectrometers in  $\text{CDCl}_3$  or  $\text{C}_6\text{D}_6$ , unless otherwise noted. Chemical shifts in  $^1\text{H}$  NMR spectra are reported in parts per million (ppm) on the  $\delta$  scale from an internal standard of residual chloroform (7.27 ppm) or residual benzene (7.16 ppm). Data are reported as follows: chemical shift, multiplicity (s = singlet, d = doublet, t = triplet, q = quartet, m = multiplet, b = broad), coupling constant in hertz (Hz), and integration. Chemical shifts of  $^{13}\text{C}$  NMR spectra are reported in ppm from the central peak of  $\text{CDCl}_3$  (77.23 ppm) on the  $\delta$  scale. Infrared (IR) spectra were recorded on a Perkin-Elmer 2000 FT-IR. High resolution mass spectra (HRMS) were obtained on a Bruker Daltonics APEXII 3 Tesla Fourier Transform Mass Spectrometer by Dr. Li Li of the Massachusetts Institute of Technology Department of Chemistry Instrument Facility. Chiral GC analysis was performed on a Varian CP-3800 gas chromatograph fitted with Chiraldex B-PH, B-DA, and G-TA capillary columns. Chiral HPLC analysis was performed on a Hewlett-Packard 1100 chromatograph equipped with a variable wavelength detector and Chiralcel OD or OD-H columns.

### Preparation of 2,2-dimethyl-3-oxo-propionic acid methyl ester

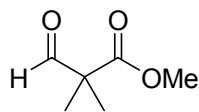

### 2,2-dimethyl-3-oxo-propionic acid methyl ester. 3-Hydroxy-2,2-

dimethyl-propionic acid methyl ester (15 g, 113 mmol) in 200 mL dichloromethane was cooled to 0°C. Pyridinium chlorochromate (43 g, 200 mmol) was added. The mixture was slowly warmed to room temperature and stirred 24 h. The crude in dichloromethane was filtered through silica gel. Celite was added to the remaining black viscous oil from the reaction mixture until the viscous oil is all absorbed to the celite. Dichloromethane was added to this slurry and the dichloromethane solution was filtered through silica gel. Dichloromethane was removed at reduced pressure (80 Torr) to give a pale yellow crude oil. Fractional distillation removed residue dichloromethane and obtained 2,2-dimethyl-3-oxo-propionic acid methyl ester as a colorless oil (7 g, 48% yield).

<sup>1</sup>H NMR (300 MHz, CDCl<sub>3</sub>, δ): 9.60 (s, 1H); 3.70 (s, 3H); 1.29 (s, 6H).

<sup>13</sup>C NMR (75 MHz, CDCl<sub>3</sub>, δ): 199.1, 173.2, 53.9, 52.6, 19.7.

IR (NaCl, thin film): 2988, 2958, 1726, 1468, 1278, 1151, 866.

### Nickel-catalyzed couplings of ethylene and aldehydes (1a, 1b, 1c, 1d, 1i, 1j, 1l, 1m, 1n).

**General procedure 1.** A 10 mL round bottom flask and a stir bar were oven-dried and brought into a glove box. Ni(cod)<sub>2</sub> (27.5 mg, 0.1 mmol, 20 mol%) and tris-*o*-methoxyphenylphosphine (70.5 mg, 0.2 mmol, 40 mol%) were added to the round bottom flask, the flask was sealed with a septum, and the sealed flask was brought out of the glove box and connected to an argon line. The catalyst mixture was dissolved in toluene (2.5 mL) under argon and stirred 15 min at room temperature. The reaction mixture was purged with ethylene for 1 min to remove argon, taken care not to introduce oxygen. The ethylene atmosphere was maintained with an ethylene balloon. Triethylamine (418 μL, 3 mmol, 600 mol%) was added. Aldehyde (0.5 mmol, 100 mol%, as specified) was added. Silyltriflate (0.875 mmol, 175 mol%, as specified) was added. The mixture was stirred at room temperature for 3 – 18 h, as judged by the TLC of the reaction mixture. The mixture was filtered through a plug of silica gel. Solvent was removed under reduced pressure and the crude mixture was diluted in hexane. Purification via flash chromatography on silica afforded the coupling product.

## Nickel-catalyzed couplings of ethylene and aldehydes (**1e**, **1f**, **1g**, **1h**, **1k**).

**General procedure 2.** A 10 mL round bottom flask and a stir bar were oven-dried and brought into a glove box. Ni(cod)<sub>2</sub> (27.5 mg, 0.1 mmol, 20 mol%), tris-*o*-methoxyphenylphosphine (70.5 mg, 0.2 mmol, 40 mol%) and aldehyde (0.5 mmol, 100 mol%) were added to the round bottom flask, the flask was sealed with a septum, and the sealed flask was brought out of the glove box and connected to an argon line. The catalyst mixture was dissolved in toluene (2.5 mL) under argon and stirred 15 min at room temperature. The reaction mixture was purged with ethylene for 1 min to remove argon, taken care not to introduce oxygen. The ethylene atmosphere was maintained with an ethylene balloon. Next triethylamine (418  $\mu$ L, 3 mmol, 600 mol%) was added. Silyltriflate (0.875 mmol, 175 mol%, as specified) was added. The mixture was stirred at room temperature for 3 – 18 h, as judged by TLC of the reaction mixture. The mixture was filtered through a plug of silica gel. Solvent was removed under reduced pressure and the crude mixture was diluted in hexane. Purification via flash chromatography on silica afforded the coupling product.

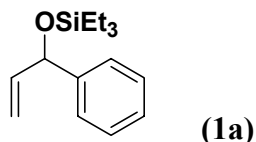

The reaction of ethylene and benzaldehyde (51  $\mu$ L, 0.5 mmol) with Ni(cod)<sub>2</sub>, tris-*o*-methoxyphenylphosphine and TESOTf (197  $\mu$ L, 0.875 mmol), triethylamine in toluene following the general procedure 1 above, afforded **1a** in 82% isolated yield as a colorless oil.

<sup>1</sup>H NMR (400 MHz, CDCl<sub>3</sub>,  $\delta$ ): 7.32 – 7.45 (m, 4H); 7.29 (t, *J* = 7.0 Hz, 1H); 6.01 (ddd, *J* = 6.0, 10.2, 16.9 Hz, 1H); 5.34 (dt, *J* = 1.5, 16.9 Hz, 1H); 5.25 (d, *J* = 5.9 Hz, 1H); 5.13 (dt, *J* = 1.5, 10.2 Hz, 1H); 0.99 (t, *J* = 8.0 Hz, 9H); 0.66 (dq, *J* = 1.8, 7.8 Hz, 6H).

<sup>13</sup>C NMR (100 MHz, CDCl<sub>3</sub>,  $\delta$ ): 143.9, 141.8, 128.4, 127.3, 126.2, 113.7, 75.9, 7.0, 5.1.

IR (NaCl, thin film): 2956, 2877, 1640, 1454, 1240, 1065, 744, 699.

HRMS-ESI (*m/z*): [M + Na]<sup>+</sup> calcd for C<sub>15</sub>H<sub>24</sub>OSiNa, 271.149; found, 271.150.

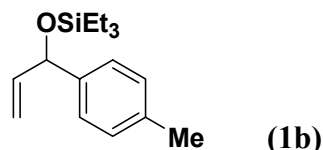

The reaction of ethylene and *p*-tolualdehyde (59  $\mu$ L, 0.5 mmol) with Ni(cod)<sub>2</sub>, tris-*o*-methoxyphenylphosphine and TESOTf (197  $\mu$ L, 0.875 mmol), triethylamine in toluene following the general procedure 1 above, afforded **1b** in 88% isolated yield as a colorless oil.

<sup>1</sup>H NMR (400 MHz, CDCl<sub>3</sub>,  $\delta$ ): 7.27 (d,  $J$  = 8.0, 2H); 7.16 (d,  $J$  = 8.0 Hz, 2H); 5.97 (ddd,  $J$  = 5.9, 10.2, 16.9 Hz, 1H); 5.30 (dt,  $J$  = 1.5, 17.0 Hz, 1H); 5.17 (d,  $J$  = 5.9 Hz, 1H); 5.09 (dt,  $J$  = 1.3, 10.2 Hz, 1H); 2.37 (s, 3H); 0.97 (t,  $J$  = 7.9 Hz, 9H); 0.65 (dq,  $J$  = 1.9, 7.5 Hz, 6H).

<sup>13</sup>C NMR (100 MHz, CDCl<sub>3</sub>,  $\delta$ ): 142.1, 141.1, 136.8, 129.1, 126.2, 113.4, 75.8, 21.3, 7.0, 5.2.

IR (NaCl, thin film): 2955, 2877, 1640, 1513, 1458, 1415, 1079, 1007, 844.

HRMS-ESI ( $m/z$ ): [M + Na]<sup>+</sup> calcd for C<sub>16</sub>H<sub>26</sub>OSiNa, 285.165; found, 285.165.

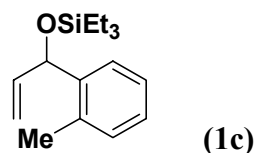

The reaction of ethylene and *o*-tolualdehyde (58  $\mu$ L, 0.5 mmol) with Ni(cod)<sub>2</sub>, tris-*o*-methoxyphenylphosphine and TESOTf (197  $\mu$ L, 0.875 mmol), triethylamine in toluene following the general procedure 1 above, afforded **1c** in 93% isolated yield as a colorless oil.

<sup>1</sup>H NMR (400 MHz, CDCl<sub>3</sub>,  $\delta$ ): 7.50 (d,  $J$  = 7.0, 1H); 7.11 – 7.24 (m, 3H); 5.93 (ddd,  $J$  = 5.7, 10.2, 17.0 Hz, 1H); 5.36 (d,  $J$  = 5.6 Hz, 1H); 5.22 (dt,  $J$  = 1.6, 17.1 Hz, 1H); 5.08 (dt,  $J$  = 1.5, 10.2 Hz, 1H); 2.34 (s, 3H); 0.95 (t,  $J$  = 8.0 Hz, 9H); 0.61 (dq,  $J$  = 2.8, 7.5 Hz, 6H).

<sup>13</sup>C NMR (100 MHz, CDCl<sub>3</sub>,  $\delta$ ): 141.9, 140.7, 134.4, 130.3, 127.1, 126.5, 126.3, 113.7, 73.1, 19.4, 7.0, 5.1.

IR (NaCl, thin film): 2955, 2877, 1639, 1461, 1066, 1007, 744.

HRMS-ESI ( $m/z$ ): [M + Na]<sup>+</sup> calcd for C<sub>16</sub>H<sub>26</sub>OSiNa, 285.165; found, 285.165.

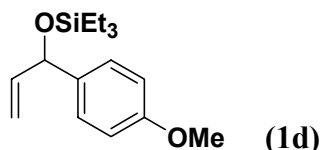

The reaction of ethylene and *p*-anisaldehyde (61  $\mu$ L, 0.5 mmol) with Ni(cod)<sub>2</sub>, tris-*o*-methoxyphenylphosphine and TESOTf (197  $\mu$ L, 0.875 mmol), triethylamine in toluene following the general procedure 1 above, afforded **1d** in 95% isolated yield as a colorless oil.

<sup>1</sup>H NMR (400 MHz, CDCl<sub>3</sub>,  $\delta$ ): 7.30 (d,  $J$  = 8.7 Hz, 2H); 6.90 (d,  $J$  = 8.7 Hz, 2H); 5.97 (ddd,  $J$  = 5.9, 10.2, 16.9 Hz, 1H); 5.29 (dt,  $J$  = 1.4, 17.0 Hz, 1H); 5.16 (d,  $J$  = 5.9 Hz, 1H); 5.10 (dt,  $J$  = 1.4, 10.2 Hz, 1H); 3.83 (s, 3H); 0.96 (t,  $J$  = 7.9 Hz, 9H); 0.63 (dq,  $J$  = 1.8, 7.5 Hz, 6H).

<sup>13</sup>C NMR (100 MHz, CDCl<sub>3</sub>,  $\delta$ ): 158.9, 142.0, 136.2, 127.4, 113.7, 113.4, 75.4, 55.4, 7.0, 5.1.

IR (NaCl, thin film): 2955, 2877, 1639, 1511, 1464, 1246, 1037, 744.

HRMS-ESI ( $m/z$ ): [M + Na]<sup>+</sup> calcd for C<sub>16</sub>H<sub>26</sub>O<sub>2</sub>SiNa, 301.159; found, 301.159.

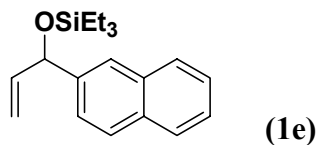

The reaction of ethylene and 2-naphthaldehyde (78.1 mg, 0.5 mmol) with Ni(cod)<sub>2</sub>, tris-*o*-methoxyphenylphosphine and TESOTf (197  $\mu$ L, 0.875 mmol), triethylamine in toluene following the general procedure 2 above, afforded **1e** in 95% isolated yield as a colorless oil.

<sup>1</sup>H NMR (400 MHz, CDCl<sub>3</sub>,  $\delta$ ): 7.82 – 7.92 (m, 4H); 7.48 – 7.55 (m, 3H); 6.07 (ddd,  $J$  = 6.2, 10.2, 15.8 Hz, 1H); 5.35 – 5.45 (m, 2H); 5.17 (dt,  $J$  = 1.3, 10.1 Hz, 1H); 1.00 (t,  $J$  = 7.8 Hz, 9H); 0.68 (dq,  $J$  = 2.5, 7.5 Hz, 6H).

<sup>13</sup>C NMR (100 MHz, CDCl<sub>3</sub>,  $\delta$ ): 141.7, 141.4, 133.5, 133.0, 128.2, 128.1, 127.7, 126.1, 125.8, 124.8, 124.6, 114.0, 76.0, 7.0, 5.1.

IR (NaCl, thin film): 2955, 2876, 1640, 1458, 1239, 1006, 743.

HRMS-ESI ( $m/z$ ): [M + Na]<sup>+</sup> calcd for C<sub>19</sub>H<sub>26</sub>OSiNa, 321.165; found, 321.164.

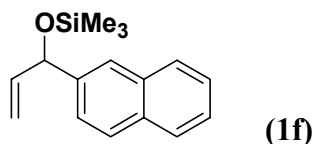

The reaction of ethylene and 2-naphthaldehyde (78.1 mg, 0.5 mmol) with Ni(cod)<sub>2</sub>, tris-*o*-methoxyphenylphosphine and TMSOTf (158 μL, 0.875 mmol), triethylamine in toluene following the general procedure 2 above, afforded **1f** in 60% isolated yield as a colorless oil.

<sup>1</sup>H NMR (400 MHz, CDCl<sub>3</sub>, δ): 7.80 – 7.90 (m, 4H); 7.45 – 7.54 (m, 3H); 6.06 (ddd, *J* = 5.6, 10.2, 17.4 Hz, 1H); 5.30 (dt, *J* = 1.5, 17.3 Hz, 1H); 5.37 (bs, 1H); 5.17 (dt, *J* = 1.4, 10.2 Hz, 1H); 0.18 (s, 9H).

<sup>13</sup>C NMR (100 MHz, CDCl<sub>3</sub>, δ): 141.4, 141.0, 133.5, 133.0, 128.19, 128.18, 127.9, 126.2, 125.9, 124.9, 124.8, 114.4, 76.1, 0.4.

IR (NaCl, thin film): 2958, 1640, 1251, 1077, 841.

HRMS-ESI (*m/z*): [M + Na]<sup>+</sup> calcd for C<sub>16</sub>H<sub>20</sub>OSiNa, 279.118; found, 279.119.

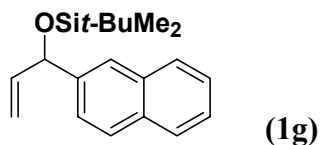

The reaction of ethylene and 2-naphthaldehyde (78.1 mg, 0.5 mmol) with Ni(cod)<sub>2</sub>, tris-*o*-methoxyphenylphosphine and TBSOTf (201 μL, 0.875 mmol), triethylamine in toluene following the general procedure 2 above, afforded **1g** in 67% isolated yield as a colorless oil.

<sup>1</sup>H NMR (400 MHz, CDCl<sub>3</sub>, δ): 7.80 – 7.92 (m, 4H); 7.45 – 7.55 (m, 3H); 6.04 (ddd, *J* = 5.8, 10.2, 16.8 Hz, 1H); 5.39 (dt, *J* = 1.5, 17.0 Hz, 1H); 5.38 (s, 1H); 5.14 (dt, *J* = 1.5, 10.2 Hz, 1H); 0.99 (s, 9H); 0.16 (s, 3H); 0.06 (s, 3H).

<sup>13</sup>C NMR (100 MHz, CDCl<sub>3</sub>, δ): 141.8, 141.4, 133.5, 133.0, 128.2, 128.1, 127.9, 126.1, 125.8, 124.8, 124.6, 113.8, 76.2, 26.1, 18.6, -4.4, -4.6.

IR (NaCl, thin film): 2956, 2857, 1636, 1472, 1252, 1081, 837.

HRMS-ESI (*m/z*): [M + Na]<sup>+</sup> calcd for C<sub>19</sub>H<sub>26</sub>OSiNa, 321.165; found, 321.164.

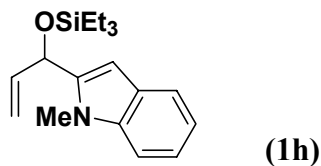

The reaction of ethylene and 1-methyl-2-indolecarboxaldehyde (79.6 mg, 0.5 mmol) with Ni(cod)<sub>2</sub>, tris-*o*-methoxy-phenylphosphine and TESOTf (197 μL, 0.875 mmol), triethylamine in toluene following the general procedure 2 above, afforded **1h** in 67% isolated yield as a colorless oil.

<sup>1</sup>H NMR (400 MHz, CDCl<sub>3</sub>, δ): 7.63 (d, *J* = 7.8 Hz, 1H); 7.36 (d, *J* = 8.2 Hz, 1H); 7.26 (t, *J* = 8.3 Hz, 1H); 7.14 (t, *J* = 7.9 Hz, 1H); 6.43 (s, 1H); 6.13 (ddd, *J* = 4.5, 10.3, 17.1 Hz, 1H); 5.52 (ddd, *J* = 1.7, 1.7, 4.5 Hz, 1H); 5.39 (ddd, *J* = 1.7, 1.7, 17.1 Hz, 1H); 5.25 (ddd, *J* = 1.7, 1.7, 10.4, 1H); 3.82 (s, 3H); 0.98 (t, *J* = 8.0 Hz, 9H); 0.66 (dq, *J* = 1.4, 8.0 Hz, 6H).

<sup>13</sup>C NMR (100 MHz, CDCl<sub>3</sub>, δ): 140.6, 139.7, 138.5, 127.5, 121.5, 120.8, 119.4, 114.9, 109.1, 100.5, 70.4, 31.0, 7.0, 5.0.

IR (NaCl, thin film): 2955, 2911, 2876, 1911, 1758, 1641, 1469, 1238, 1009, 841, 731.

HRMS-ESI (*m/z*): [M + Na]<sup>+</sup> calcd for C<sub>18</sub>H<sub>27</sub>NOSiNa, 324.178; found, 324.178.

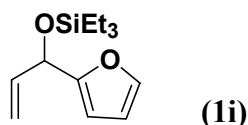

The reaction of ethylene and furan-2-carbaldehyde (41 μL, 0.5 mmol) with Ni(cod)<sub>2</sub>, tris-*o*-methoxyphenylphosphine and TESOTf (197 μL, 0.875 mmol), triethylamine in toluene following the general procedure 1 above, afforded **1i** in 38% isolated yield as a colorless oil.

<sup>1</sup>H NMR (400 MHz, CDCl<sub>3</sub>, δ): 7.37 (bs, 1H); 6.32 (dd, *J* = 1.9, 3.1 Hz, 1H); 6.22 (d, *J* = 3.2 Hz, 1H); 6.06 (m, 1H); 5.40 (d, *J* = 17.1 Hz, 1H); 5.21 (d, *J* = 7.9 Hz, 2H); 0.95 (t, *J* = 7.9 Hz, 9H); 0.63 (q, *J* = 7.9 Hz, 6H).

<sup>13</sup>C NMR (100 MHz, CDCl<sub>3</sub>, δ): 156.0, 142.1, 138.1, 115.3, 110.4, 106.4, 69.3, 6.9, 4.9.

IR (NaCl, thin film): 2956, 2878, 1646, 1459, 1237, 1010, 733.

HRMS-ESI (*m/z*): [M + Na]<sup>+</sup> calcd for C<sub>13</sub>H<sub>22</sub>O<sub>2</sub>SiNa, 261.128; found, 261.129.



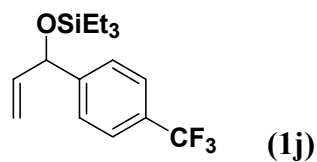

The reaction of ethylene and 4-(trifluoromethyl)-benzaldehyde (70  $\mu$ L, 0.5 mmol) with Ni(cod)<sub>2</sub>, tris-*o*-methoxyphenylphosphine and TESOTf (197  $\mu$ L, 0.875 mmol), triethylamine in toluene following the general procedure 1 above, afforded a mixture of **1j** and triethylsilylethers of pinnacol coupling products. This mixture was subjected to TBAF to isolate 25% of the desilylated **1j** as a colorless oil.

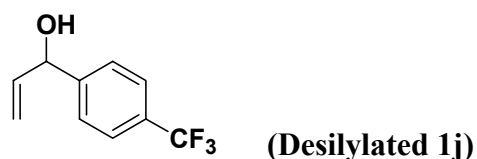

<sup>1</sup>H NMR (400 MHz, CDCl<sub>3</sub>,  $\delta$ ): 7.62 (d,  $J$  = 8.2 Hz, 2H); 7.50 (d,  $J$  = 8.4 Hz, 2H); 6.02 (ddd,  $J$  = 6.3, 10.3, 16.9 Hz, 1H); 5.38 (ddd,  $J$  = 1.2, 1.2, 17.0 Hz, 1H); 5.27 (bd,  $J$  = 7.0 Hz, 1H); 5.25 (ddd,  $J$  = 1.2, 1.2, 10.3 Hz, 1H); 2.10 (bs, 1H).

<sup>13</sup>C NMR (100 MHz, CDCl<sub>3</sub>,  $\delta$ ): 146.5, 139.8, 130.0 ( $J$  = 32.3 Hz), 126.7, 125.7, 123.0, 116.4, 75.1.

<sup>19</sup>F NMR (376 MHz, CDCl<sub>3</sub>,  $\delta$ ): -66.8 (s, 3F).

IR (NaCl, thin film): 3342, 1620, 1419, 1328, 1166, 1126, 1068, 931.

HRMS-ESI ( $m/z$ ): [M + Na]<sup>+</sup> calcd for C<sub>10</sub>H<sub>9</sub>OF<sub>3</sub>Na, 202.060; found, 202.059.

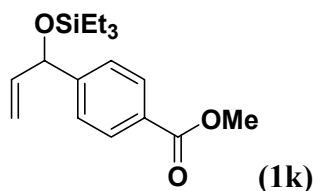

The reaction of ethylene and methyl-4-formyl-benzoate (88 mg, 0.536 mmol) with Ni(cod)<sub>2</sub>, tris-*o*-methoxy-phenylphosphine and TESOTf (197 μL, 0.875 mmol), triethylamine in toluene following the general procedure 2 above, afforded **1k** in 34% isolated yield as a colorless oil.

<sup>1</sup>H NMR (400 MHz, CDCl<sub>3</sub>, δ): 8.01 (d, *J* = 8.4 Hz, 2H); 7.43 (d, *J* = 8.1 Hz, 2H); 5.92 (ddd, *J* = 6.0, 10.2, 16.9 Hz, 1H); 5.31 (ddd, *J* = 1.5, 1.5, 17.0 Hz, 1H); 5.21 (bd, *J* = 6.0 Hz, 1H); 5.11 (ddd, *J* = 1.4, 1.4, 10.2 Hz, 1H); 3.91 (s, 3H); 0.93 (t, *J* = 7.8 Hz, 9H); 0.61 (dq, *J* = 1.7, 7.5 Hz, 6H).

<sup>13</sup>C NMR (100 MHz, CDCl<sub>3</sub>, δ): 167.2, 149.1, 141.1, 129.8, 129.1, 126.1, 114.5, 75.6, 52.2, 6.9, 5.0.

IR (NaCl, thin film): 2954, 2912, 2877, 1727, 1610, 1436, 1278, 1113, 1019, 842, 745.

HRMS-ESI (*m/z*): [M + Na]<sup>+</sup> calcd for C<sub>17</sub>H<sub>26</sub>O<sub>3</sub>SiNa, 329.154; found, 329.155.

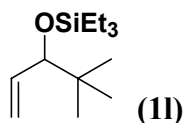

The reaction of ethylene and pivaldehyde (55 μL, 0.5 mmol) with Ni(cod)<sub>2</sub>, tris-*o*-methoxyphenylphosphine and TESOTf (197 μL, 0.875 mmol), triethylamine in toluene following the general procedure 1 above, afforded **1l** in 70% isolated yield as a colorless oil.

<sup>1</sup>H NMR (400 MHz, CDCl<sub>3</sub>, δ): 5.97 (ddd, *J* = 5.9, 10.2, 16.9 Hz, 1H); 5.11 (d, *J* = 8.5 Hz, 1H); 5.08 (bs, 1H); 3.67 (d, *J* = 7.5 Hz, 1H); 0.96 (t, *J* = 7.9 Hz, 9H); 0.86 (s, 9H); 0.63 (q, *J* = 7.7 Hz, 6H).

<sup>13</sup>C NMR (100 MHz, CDCl<sub>3</sub>, δ): 139.4, 115.8, 82.4, 35.5, 26.0, 7.2, 5.3.

IR (NaCl, thin film): 2955, 2877, 1641, 1462, 1239, 1082, 835.

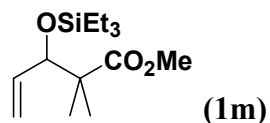

The reaction of ethylene and 2,2-dimethyl-3-oxo-propionic acid methyl ester (70 mg, 0.54 mmol) with Ni(cod)<sub>2</sub>, tris-*o*-methoxyphenylphosphine and TESOTf (197 μL, 0.875 mmol), triethylamine in toluene following the general procedure 1 above, afforded **1m** in 81% (0.28 mmol) isolated yield as a colorless oil.

<sup>1</sup>H NMR (400 MHz, CDCl<sub>3</sub>, δ): 5.75 (ddd, *J* = 7.6, 10.4, 17.5 Hz, 1H); 5.17 (bd, *J* = 17.3 Hz, 1H); 5.15 (bd, *J* = 10.3 Hz, 1H); 4.31 (d, *J* = 7.6 Hz, 1H); 3.66 (s, 3H); 1.15 (s, 3H); 1.05 (s, 3H); 0.92 (t, *J* = 7.9 Hz, 9H); 0.55 (dq, *J* = 1.5, 7.6 Hz, 6H).

<sup>13</sup>C NMR (100 MHz, CDCl<sub>3</sub>, δ): 177.4, 137.8, 117.3, 79.2, 51.8, 48.3, 21.4, 19.9, 7.0, 5.2.

IR (NaCl, thin film): 2954, 2878, 1745, 1732, 1642, 1468, 1261, 1087, 834.

HRMS-ESI (*m/z*): [M + Na]<sup>+</sup> calcd for C<sub>14</sub>H<sub>28</sub>O<sub>3</sub>SiNa, 295.170; found, 295.171.

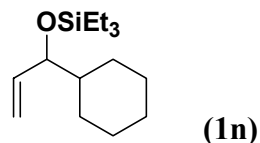

The reaction of ethylene and cyclohexanecarboxaldehyde (60 μL, 0.5 mmol) with Ni(cod)<sub>2</sub>, tris-*o*-methoxyphenylphosphine and TESOTf (197 μL, 0.875 mmol), triethylamine in toluene following the general procedure 1 above, afforded **1n** in 25% yield as determined by <sup>1</sup>H NMR versus a standard. Another experiment was carried out under 2 atm of ethylene and yielded 34% **1n** and 66% silyl enol ether of cyclohexanecarboxaldehyde. Treatment of this mixture with a TBAF / THF / H<sub>2</sub>O solution removed the silyl enol ether from the mixture and column chromatography isolated **1n** as a colorless oil.

<sup>1</sup>H NMR (400 MHz, CDCl<sub>3</sub>, δ): 5.78 (ddd, *J* = 7.0, 10.3, 17.3 Hz, 1H); 5.07 (m, 2H); 3.78 (t, *J* = 6.6 Hz, 1H); 1.40 – 0.90 (m, 11H); 0.95 (t, *J* = 8.0 Hz, 9H); 0.59 (q, *J* = 8.0 Hz, 6H).

<sup>13</sup>C NMR (125 MHz, CDCl<sub>3</sub>, δ): 140.7, 114.8, 78.9, 44.5, 29.0, 29.0, 26.9, 26.5, 26.5, 7.1, 5.2.

IR (NaCl, thin film): 2953, 2926, 2877, 1644, 1451, 1239, 1068, 743.

HRMS-ESI (*m/z*): [M + Na]<sup>+</sup> calcd for C<sub>15</sub>H<sub>30</sub>OSiNa, 277.196; found, 277.197.

## Nickel-catalyzed coupling of monosubstituted olefins and aldehydes (**2a** – **2p**).

### Nickel-catalyzed coupling of monosubstituted alkenes and aldehydes (homoallylic products)

**General procedure 3.** A 10 mL test tube and a stir bar were oven-dried and brought into a glove box. Ni(cod)<sub>2</sub> (27.5 mg, 0.1 mmol, 20 mol%) and ligand (0.2 mmol, 40 mol% as specified) were added to the test tube, the test tube was sealed with a septum, and the sealed tube was brought out of the glove box and connected to an argon line. The catalyst mixture was dissolved in toluene (2.5 mL) under argon and stirred 5 min at room temperature. Alkene (0.5 mL), triethylamine (418  $\mu$ L, 3 mmol, 600 mol%) and then aldehyde (0.5 mmol, 100 mol%) were added. TESOTf (197  $\mu$ L, 0.875 mmol, 175 mol%) was added. The mixture was stirred at room temperature for 48 h. The mixture was filtered through a plug of silica gel. Solvent was removed under reduced pressure and the crude mixture was diluted in hexane. Purification via flash chromatography on silica afforded the coupling product.

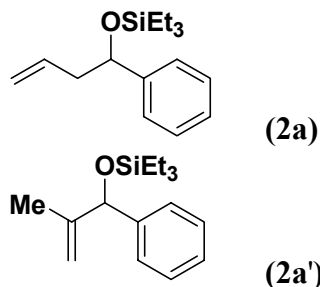

A 10 mL test tube and a stir bar were oven-dried and brought into a glove box. Ni(cod)<sub>2</sub> (27.5 mg, 0.1 mmol, 20 mol%) and EtOPh<sub>2</sub>P (43  $\mu$ L, 0.2 mmol, 40 mol%) were added to the round bottom flask, the flask was sealed with a septum, and the sealed flask was brought out of the glove box and connected to an argon line. The catalyst mixture was dissolved in toluene (2.5 mL) under argon and stirred 5 min at room temperature. The reaction mixture was purged with propene for 1 min to remove argon, taken care not to introduce oxygen. The propene atmosphere was maintained with a propene balloon. Triethylamine (418  $\mu$ L, 3 mmol, 600 mol%) was added. benzaldehyde (51  $\mu$ L, 0.5 mmol, 100 mol%) was added. Silyltriflate (0.875 mmol, 175 mol%, as specified) was added. The mixture was stirred at room temperature for 48 h. The mixture was filtered through a plug of silica gel. Solvent was removed under reduced pressure and <sup>1</sup>H NMR of the crude mixture indicated the total yield of **2a** and **2a'** was 73% and the ratio of **2a**:**2a'** is 89:11. Purification via flash chromatography on silica afforded **2a** and **2a'** as colorless oils.

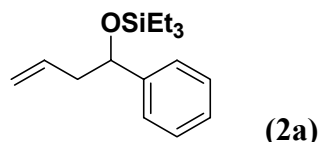

$^1\text{H NMR}$  (400 MHz,  $\text{CDCl}_3$ ,  $\delta$ ): 7.27-7.38 (m, 5H); 5.78-5.89 (m, 1H); 5.05-5.10 (m, 2H); 4.74 (dd,  $J = 7.2, 5.5$  Hz, 1H); 2.42-2.59 (m, 2H); 0.94 (t,  $J = 7.9$  Hz, 9H); 0.59 (dq,  $J = 2.6, 7.9$  Hz, 6H).

$^{13}\text{C NMR}$  (100 MHz,  $\text{CDCl}_3$ ,  $\delta$ ): 145.3, 135.4, 128.2, 127.2, 126.1, 117.0, 75.1, 45.6, 7.0, 5.0.

IR (NaCl, thin film): 2954, 2927, 2876, 1644, 1493, 1449, 1239, 1090, 858, 699.

HRMS-ESI ( $m/z$ ):  $[\text{M} + \text{Na}]^+$  calcd for  $\text{C}_{16}\text{H}_{26}\text{OSiNa}$ , 285.165; found, 285.163.

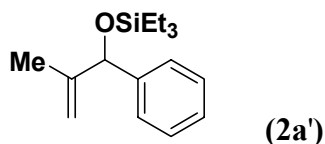

$^1\text{H NMR}$  (400 MHz,  $\text{CDCl}_3$ ,  $\delta$ ): 7.24-7.39 (m, 5H); 5.15 (m, 2H); 4.86 (s, 1H); 1.56 (s, 3H); 0.94 (t,  $J = 7.8$  Hz, 9H); 0.61 (q,  $J = 7.8$  Hz, 6H).

$^{13}\text{C NMR}$  (100 MHz,  $\text{CDCl}_3$ ,  $\delta$ ): 148.1, 143.5, 128.1, 127.0, 126.3, 111.0, 78.4, 17.4, 7.0, 5.0.

IR (NaCl, thin film): 2955, 2913, 2877, 1451, 1237, 1091, 1066, 1005, 899, 853, 740, 698.

HRMS-ESI ( $m/z$ ):  $[\text{M} + \text{Na}]^+$  calcd for  $\text{C}_{16}\text{H}_{26}\text{OSiNa}$ , 285.165; found, 285.165.

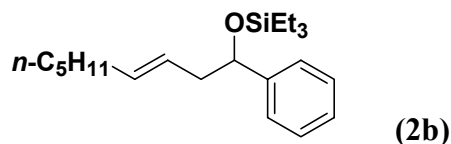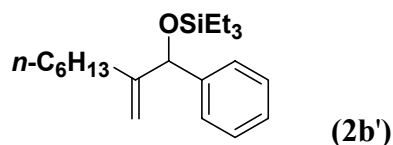

The reaction of 1-octene and benzaldehyde (51  $\mu\text{L}$ , 0.5 mmol) with  $\text{Ni}(\text{cod})_2$ ,  $\text{EtOPh}_2\text{P}$  (43  $\mu\text{L}$ , 0.2 mmol, 40 mol%) and  $\text{TESOTf}$  (197  $\mu\text{L}$ , 0.875 mmol), triethylamine in toluene following the general procedure 3 above afforded **2b** and **2b'** in 85% total yield according to  $^1\text{H}$  NMR of the crude mixture and the ratio of **2b**:**2b'** is 95:5. The *E* / *Z* ratio of **2b** is 75:25. Purification via flash chromatography on silica afforded **2b** and **2b'** as colorless oils.

In another experiment, the reaction of 1-octene (1 mL) and benzaldehyde (51  $\mu\text{L}$ , 0.5 mmol) with  $\text{Ni}(\text{cod})_2$ ,  $\text{Cy}_2\text{PhP}$  (56 mg, 0.2 mmol, 40 mol%) and  $\text{TESOTf}$  (197  $\mu\text{L}$ , 0.875 mmol), triethylamine in toluene following the general procedure 3 above afforded **2b'** and **2b** in 73% total yield according to  $^1\text{H}$  NMR of the crude mixture and the ratio of **2b'**:**2b** is 71:29. Purification via flash chromatography on silica afforded **2b'** and **2b** in 70% isolated yield as a colorless oil.

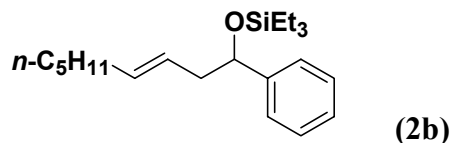

$^1\text{H}$  NMR (400 MHz,  $\text{CDCl}_3$ ,  $\delta$ ): 7.20–7.40 (m, 5H); 5.30–5.50 (m, 2H); 4.63 (dd,  $J = 5.6, 7.2$  Hz, 1H); 2.45 (quintet,  $J = 6.1$  Hz, 1H); 2.35 (quintet,  $J = 5.9$  Hz, 1H); 1.33 (m, 2H); 0.92 (t,  $J = 7.8$  Hz, 12H); 0.56 (dq,  $J = 2.4, 7.6$  Hz, 6H).

$^{13}\text{C}$  NMR (100 MHz,  $\text{CDCl}_3$ ,  $\delta$ ): 145.6, 133.3, 128.1, 127.1, 126.6, 126.2, 75.6, 44.5, 32.8, 31.6, 29.3, 22.8, 14.2, 7.0, 5.1.

HRMS-ESI ( $m/z$ ):  $[\text{M} + \text{Na}]^+$  calcd for  $\text{C}_{21}\text{H}_{36}\text{OSiNa}$ , 355.243; found, 355.244.

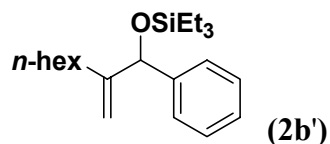

$^1\text{H}$  NMR (400 MHz,  $\text{CDCl}_3$ ,  $\delta$ ): 7.36 (d,  $J = 7.0$  Hz, 2H); 7.31 (t,  $J = 7.1$  Hz, 2H); 7.24 (t,  $J = 7.2$ , 1H); 5.22 (bs, 1H); 5.15 (bs, 1H); 4.87 (s, 1H); 1.96 (pentet,  $J = 7.8$  Hz, 1H); 1.76 (pentet,  $J = 8.0$  Hz, 1H); 1.15 – 1.40 (m, 8H); 0.93 (t,  $J = 8.0$  Hz, 9H); 0.87 (t,  $J = 6.8$  Hz, 3H); 0.60 (dq,  $J = 1.6, 7.9$  Hz, 6H).

$^{13}\text{C}$  NMR (100 MHz,  $\text{CDCl}_3$ ,  $\delta$ ): 152.3, 143.8, 128.1, 127.1, 126.6, 109.5, 78.3, 32.0, 30.8, 29.4, 28.0, 22.8, 14.3, 7.0, 5.1.

IR (NaCl, thin film): 2956, 2876, 1647, 1456, 1089, 1066, 742.

HRMS-ESI ( $m/z$ ):  $[\text{M} + \text{Na}]^+$  calcd for  $\text{C}_{21}\text{H}_{36}\text{OSiNa}$ , 355.243; found, 355.242.

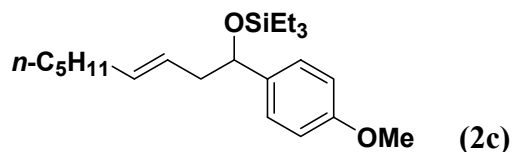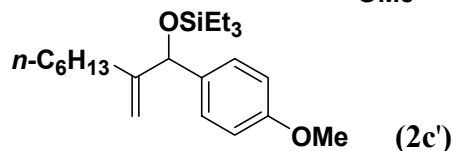

The reaction of 1-octene and 4-anisaldehyde (61  $\mu$ L, 0.5 mmol) with Ni(cod)<sub>2</sub>, EtOPh<sub>2</sub>P (43  $\mu$ L, 0.2 mmol, 40 mol%) and TESOTf (197  $\mu$ L, 0.875 mmol), triethylamine in toluene following the general procedure 3 above afforded **2c** and **2c'** in 85% total yield according to <sup>1</sup>H NMR of the crude mixture and the ratio of **2c**:**2c'** is >95:5. The *E* / *Z* ratio of **2c** is 75:25. Purification via flash chromatography on silica afforded **2c** as a colorless oil. **2c'** was not detected.

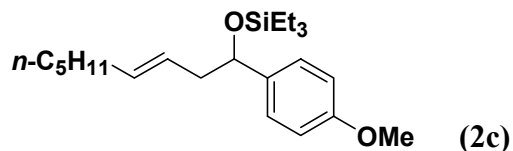

<sup>1</sup>H NMR (400 MHz, CDCl<sub>3</sub>,  $\delta$ ): 7.22 (d, *J* = 8.6 Hz, 2H); 6.84 (d, *J* = 8.6 Hz, 2H); 5.33-5.43 (m, 2H); 4.58 (dd, *J* = 6.1 Hz, 6.1 Hz, 1H); 3.81 (s, 3H); 2.27-2.42 (m, 2H); 1.93-1.98 (m, 2H); 1.22-1.60 (m, 6H); 0.95 (t, *J* = 8.0 Hz, 3H); 0.88 (t, *J* = 7.8 Hz, 9H); 0.53 (q, *J* = 7.8 Hz, 6H).

<sup>13</sup>C NMR (100 MHz, CDCl<sub>3</sub>,  $\delta$ ): 158.7, 137.9, 133.2, 127.3, 126.7, 113.4, 75.2, 55.4, 44.5, 32.8, 31.6, 29.3, 22.8, 14.3, 7.0, 5.0.

IR (NaCl, thin film): 2955, 2876, 1613, 1512, 1459, 1302, 1247, 1172, 1078, 1005, 972, 830, 742.

HRMS-ESI (*m/z*): [M + Na]<sup>+</sup> calcd for C<sub>22</sub>H<sub>38</sub>O<sub>2</sub>SiNa, 385.2539; found, 385.2537.



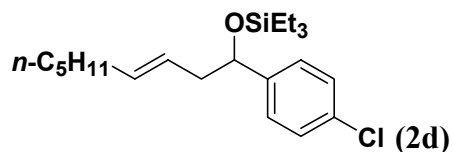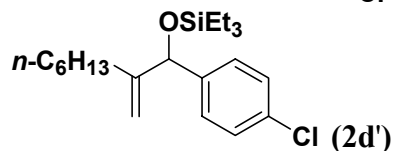

The reaction of 1-octene and 4-chlorobenzaldehyde (70 mg, 0.5 mmol) with  $\text{Ni}(\text{cod})_2$ ,  $\text{EtOPh}_2\text{P}$  (43  $\mu\text{l}$ , 0.2 mmol, 40 mol%) and  $\text{TESOTf}$  (197  $\mu\text{L}$ , 0.875 mmol), triethylamine in toluene following the general procedure 3 above afforded **2d** and **2d'** in 37% total yield according to  $^1\text{H}$  NMR of the crude mixture and the ratio of **2d**:**2d'** is >95:5. The *E* / *Z* ratio of **2d** is 74:26. Purification via flash chromatography on silica afforded **2d** as a colorless oil. **2d'** was not detected.

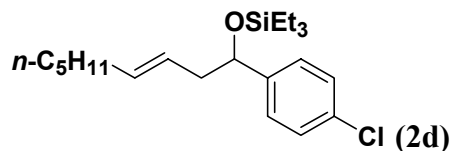

$^1\text{H}$  NMR (400 MHz,  $\text{CDCl}_3$ ,  $\delta$ ): 7.24 (m, 4H); 5.30-5.41 (m, 2H); 4.61 (dd,  $J = 6.1$  Hz, 6.1 Hz, 1H); 2.26-2.40 (m, 2H); 1.89-1.97 (m, 2H); 1.21-1.59 (m, 6H); 0.94 (t,  $J = 8.0$  Hz, 3H); 0.89 (t,  $J = 7.8$  Hz, 9H); 0.54 (q,  $J = 7.8$  Hz, 6H).

$^{13}\text{C}$  NMR (100 MHz,  $\text{CDCl}_3$ ,  $\delta$ ): 144.1, 133.7, 132.5, 128.2, 127.5, 126.0, 74.8, 44.4, 32.8, 31.5, 29.2, 22.7, 14.3, 7.0, 4.9.

IR (NaCl, thin film): 2956, 2876, 1647, 1456, 1089, 1066, 742.

HRMS-ESI ( $m/z$ ):  $[\text{M} + \text{Na}]^+$  calcd for  $\text{C}_{15}\text{H}_{20}\text{Na}$ , 223.1463; found, 223.1305.

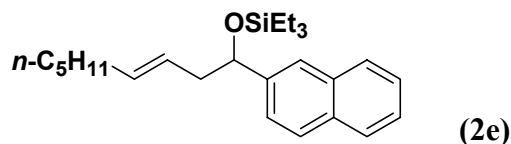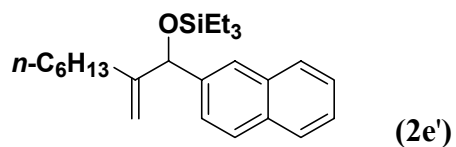

The reaction of 1-octene and 2-naphthaldehyde (78 mg, 0.5 mmol) with Ni(cod)<sub>2</sub>, EtOPh<sub>2</sub>P (43 μl, 0.2 mmol, 40 mol%) and TESOTf (197 μL, 0.875 mmol), triethylamine in toluene following the general procedure 3 above afforded **2e** and **2e'** in 88% total yield according to <sup>1</sup>H NMR of the crude mixture and the ratio of **2e**:**2e'** is >95:5. The *E* / *Z* ratio of **2e** is 70:30. Purification via flash chromatography on silica afforded **2e** as a colorless oil. **2e'** was not detected.

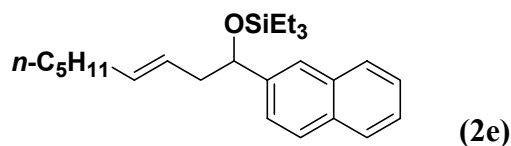

<sup>1</sup>H NMR (400 MHz, CDCl<sub>3</sub>, δ): 7.83-7.92 (m, 3H); 7.80 (s, 1H); 7.48-7.59 (m, 3H); 5.43-5.53 (m, 2H); 4.89 (dd, *J* = 6.9, 13.2 Hz, 1H); 2.45-2.68 (m, 2H); 1.98-2.05 (m, 2H); 1.26-1.39 (m, 6H); 0.97 (t, *J* = 8.0 Hz, 9H); 0.94 (t, *J* = 7.6 Hz, 3H); 0.63 (q, *J* = 4.1, 8.0 Hz 6H).

<sup>13</sup>C NMR (100 MHz, CDCl<sub>3</sub>, δ): 143.1, 133.4, 133.0, 132.3, 128.1, 127.9, 126.5, 126.0, 125.6, 125.6, 124.7, 124.7, 75.7, 44.4, 32.8, 31.7, 29.3, 22.8, 14.3, 7.0, 5.1.

IR (NaCl, thin film): 2956, 2929, 2875, 1458, 1414, 1377, 1239, 1086, 1005, 972, 744.

HRMS-ESI (*m/z*): [M + Na]<sup>+</sup> calcd for C<sub>25</sub>H<sub>38</sub>OSiNa, 405.2590; found, 405.2584.

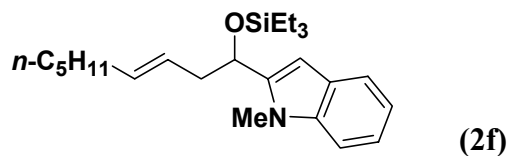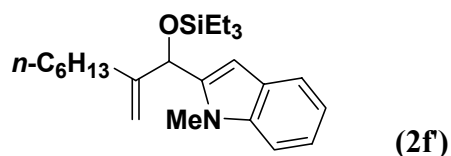

The reaction of 1-octene and 1-methyl-2-indolecarboxaldehyde (79.6 mg, 0.5 mmol) with Ni(cod)<sub>2</sub>, EtOPh<sub>2</sub>P (43 μl, 0.2 mmol, 40 mol%) and TESOTf (197 μL, 0.875 mmol), triethylamine in toluene following the general procedure 3 above afforded **2f** and **2f'** in 56% total yield according to <sup>1</sup>H NMR of the crude mixture and the ratio of **2f**:**2f'** is >95:5. The *E* / *Z* ratio of **2f** is 83:17. Purification via flash chromatography on silica afforded **2f** as a colorless oil. **2f'** was not detected.

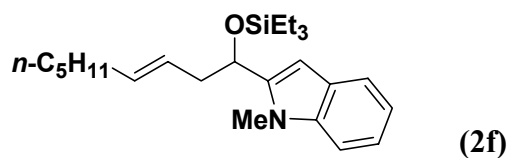

<sup>1</sup>H NMR (400 MHz, CDCl<sub>3</sub>, δ): 7.65 (d, *J* = 7.8 Hz, 1H); 7.37 (d, *J* = 8.2 Hz, 1H); 7.27 (t, *J* = 7.1 Hz, 1H); 7.17 (t, *J* = 7.1 Hz, 1H); 6.40 (s, 1H); 5.43-5.59 (m, 2H); 4.96 (dd, *J* = 6.5, 7.4 Hz, 1H); 3.92 (s, 3H); 2.56-2.71 (m, 2H); 2.01-2.07 (m, 2H); 1.29-1.42 (m, 6H); 0.97 (t, *J* = 8.0 Hz, 9H); 0.95 (t, *J* = 4.0 Hz, 3H); 0.63 (dq, *J* = 1.1, 8.0 Hz, 6H).

<sup>13</sup>C NMR (100 MHz, CDCl<sub>3</sub>, δ): 142.3, 138.4, 133.7, 127.7, 126.2, 121.3, 120.7, 119.4, 109.1, 100.2, 70.6, 42.2, 32.8, 31.6, 31.0, 29.3, 22.8, 14.3, 7.0, 5.0.

IR (NaCl, thin film): 2954, 2927, 2874, 1466, 1339, 1236, 1072, 1010, 731.

HRMS-ESI (*m/z*): [M + Na]<sup>+</sup> calcd for C<sub>24</sub>H<sub>39</sub>ONSiNa, 408.2693; found, 408.2695.

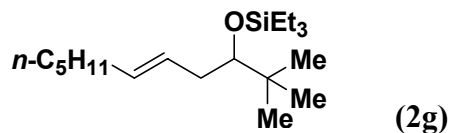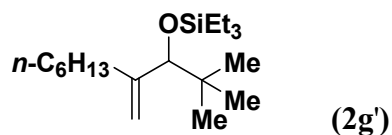

The reaction of 1-octene and pivaldehyde (55  $\mu$ L, 0.5 mmol) with Ni(cod)<sub>2</sub>, EtOPh<sub>2</sub>P (43  $\mu$ l, 0.2 mmol, 40 mol%) and TESOTf (197  $\mu$ L, 0.875 mmol), triethylamine in toluene following the general procedure 3 above afforded **2g** and **2g'** in 64% total yield according to <sup>1</sup>H NMR of the crude mixture and the ratio of **2g**:**2g'** is >95:5. The *E* / *Z* ratio of **2g** is 78:22. Purification via flash chromatography on silica afforded **2g**. **2g'** was not detected.

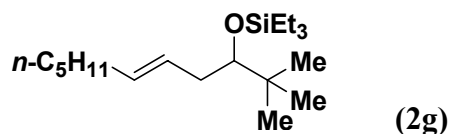

<sup>1</sup>H NMR (400 MHz, CDCl<sub>3</sub>,  $\delta$ ): 5.37-5.53 (m, 2H); 3.37 (dd, *J* = 3.8, 7.4 Hz, 1H); 2.30-2.36 (m, 1H); 1.99-2.12 (m, 3H); 1.27-1.42 (m, 6H); 0.99 (t, *J* = 8.0 Hz, 9H); 0.92 (t, *J* = 6.8 Hz, 3H); 0.90 (s, 9H); 0.63 (q, *J* = 8.0 Hz, 6H).

<sup>13</sup>C NMR (100 MHz, CDCl<sub>3</sub>,  $\delta$ ): 130.6, 128.5, 81.2, 36.2, 31.8, 31.4, 29.5, 27.6, 26.5, 22.8, 14.2, 7.3, 5.7.

IR (NaCl, thin film): 2956, 2876, 1466, 1238, 1096, 1009, 737.

HRMS-ESI (*m/z*): [M + Na]<sup>+</sup> calcd for C<sub>19</sub>H<sub>40</sub>OSiNa, 335.2746; found, 335.2741.

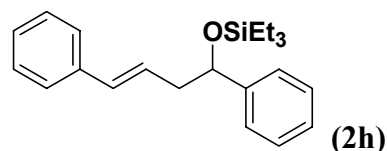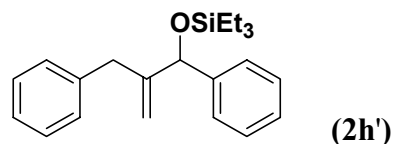

The reaction of allylbenzene and benzaldehyde (51  $\mu\text{L}$ , 0.5 mmol) with  $\text{Ni}(\text{cod})_2$ ,  $\text{Ph}_3\text{P}$  (52 mg, 0.2 mmol, 40 mol%) and TESOTf (197  $\mu\text{L}$ , 0.875 mmol), triethylamine in toluene following the general procedure 3 above afforded **2h** and **2h'** in 86% total yield according to  $^1\text{H}$  NMR of the crude mixture and the ratio of **2h**:**2h'** is 92:8. The *E* / *Z* ratio of **2h** is >95:5. Purification via flash chromatography on silica afforded **2h** as a colorless oil. **2h'** was subjected to TBAF and the free alcohol was isolated by flash chromatography on silica as a colorless oil.

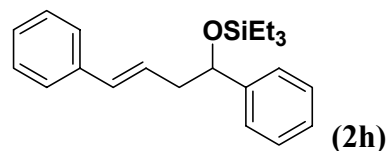

$^1\text{H}$  NMR (400 MHz,  $\text{CDCl}_3$ ,  $\delta$ ): 7.30-7.50 (m, 10H); 6.51 (d,  $J = 15.9$  Hz, 1H); 6.34 (dt,  $J = 7.2$ , 15.9 Hz, 1H); 4.89 (dd,  $J = 5.3$ , 7.2 Hz, 1H); 2.64-2.81 (m, 2H); 1.03 (t,  $J = 7.9$  Hz, 9H); 0.68 (dq,  $J = 2.0$ , 7.9 Hz, 6H).

$^{13}\text{C}$  NMR (100 MHz,  $\text{CDCl}_3$ ,  $\delta$ ): 145.5, 138.0, 132.4, 128.8, 128.4, 127.4, 127.4, 127.2, 126.3, 126.2, 75.5, 45.0, 7.1, 5.2.

IR (NaCl, thin film): 3062, 3028, 2955, 2911, 2876, 1600, 1494, 1453, 1414, 1239, 1088, 1070, 1006, 965, 830, 742, 700.

HRMS-ESI ( $m/z$ ):  $[\text{M} + \text{Na}]^+$  calcd for 361.1964; found, 361.1974.

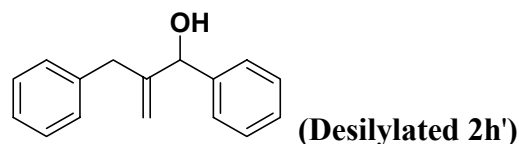

$^1\text{H}$  NMR (400 MHz,  $\text{CDCl}_3$ ,  $\delta$ ): 7.39 (m, 4H), 7.29-7.35 (m, 3H), 7.22-7.24 (m, 1H), 7.13-7.15 (m, 2H), 5.37 (s, 1H); 5.15 (s, 1H); 4.93 (s, 1H); 3.38 (d,  $J = 15.5$  Hz, 1H); 3.13 (d,  $J = 15.5$  Hz, 1H); 1.24 (brs, 1H).

$^{13}\text{C}$  NMR (100 MHz,  $\text{CDCl}_3$ ,  $\delta$ ): 150.6, 142.0, 139.3, 129.4, 128.7, 128.5, 128.1, 127.0, 126.4, 112.4, 76.7, 39.2.

IR (NaCl, thin film): 3377, 3061, 3028, 2919, 1494, 1453, 1025, 909, 750, 699.

HRMS-ESI ( $m/z$ ):  $[\text{M} + \text{Na}]^+$  calcd for  $\text{C}_{16}\text{H}_{16}\text{ONa}$ , 247.1099; found, 247.1101.

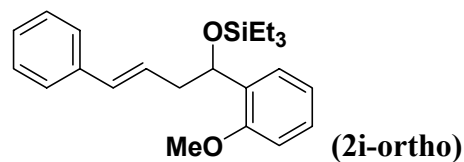

The reaction of allylbenzene and *o*-anisaldehyde (60  $\mu$ L, 0.5 mmol) with Ni(cod)<sub>2</sub>, Ph<sub>3</sub>P (52 mg, 0.2 mmol, 40 mol%) and TESOTf (197  $\mu$ L, 0.875 mmol), triethylamine in toluene following the general procedure 3 above afforded **2i-ortho** and **2i'-ortho** in 78% total yield according to <sup>1</sup>H NMR of the crude mixture and the ratio of **2i-ortho**:**2i'-ortho** is 92:8. The *E* / *Z* ratio of **2i-ortho** is >95:5. **2i-ortho** was subjected to TBAF and the free alcohol was isolated as a colorless oil. Allylic alcohol **2i'-ortho** was not isolated.

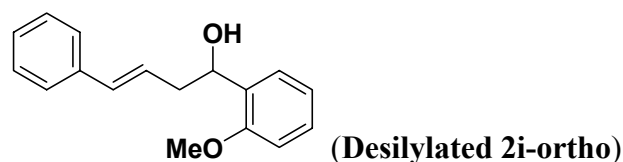

<sup>1</sup>H NMR (400 MHz, CDCl<sub>3</sub>,  $\delta$ ): 7.22–7.43 (m, 7H); 7.02 (t, *J* = 7.5 Hz, 1H); 6.93 (d, *J* = 8.1 Hz, 1H); 6.52 (d, *J* = 15.9 Hz, 1H); 6.31 (dt, *J* = 7.2, 15.9 Hz, 1H); 5.09 (dd, *J* = 5.1, 7.5 Hz, 1H); 3.89 (s, 3H); 2.69–2.81 (m, 3H).

<sup>13</sup>C NMR (100 MHz, CDCl<sub>3</sub>,  $\delta$ ): 156.5, 137.6, 132.8, 131.9, 128.6, 128.5, 127.3, 127.0, 126.9, 126.3, 120.9, 110.6, 70.2, 55.5, 41.3.

IR (NaCl, thin film): 3399, 3026, 2935, 2836, 1601, 1491, 1464, 1438, 1287, 1240, 1181, 1049, 1029, 966, 753, 694.

HRMS–ESI (*m/z*): [M+Na]<sup>+</sup> calcd for C<sub>23</sub>H<sub>32</sub>O<sub>2</sub>SiNa, 391.2069; found, 391.2053.

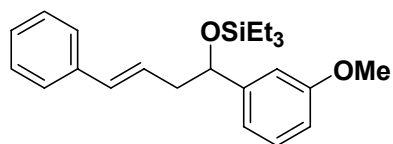

**(2i-meta)**

The reaction of allylbenzene and *m*-anisaldehyde (61  $\mu$ L, 0.5 mmol) with Ni(cod)<sub>2</sub>, Ph<sub>3</sub>P (52 mg, 0.2 mmol, 40 mol%) and TESOTf (197  $\mu$ L, 0.875 mmol), triethylamine in toluene following the general procedure 3 above afforded **2i-meta** and **2i'-meta** in 96% total yield according to <sup>1</sup>H NMR of the crude mixture and the ratio of **2i-meta**:**2i'-meta** is 92:8. The *E* / *Z* ratio of **2i-meta** is >95:5. Purification via flash chromatography on silica afforded **2i-meta** as a colorless oil. Allylic alcohol **2i'-meta** was not isolated.

<sup>1</sup>H NMR (400 MHz, CDCl<sub>3</sub>,  $\delta$ ): 7.25–7.41 (m, 6H), 7.03 (m, 1H), 7.0 (d, *J* = 7.6 Hz, 1H); 6.87 (dd, *J* = 0.8, 2.7 Hz, 1H); 6.48 (d, *J* = 15.9 Hz, 1H); 6.30 (dt, *J* = 7.2, 15.9 Hz, 1H); 3.87 (s, 3H); 2.61–2.75 (m, 2H), 0.99 (t, *J* = 7.9 Hz, 9H); 0.64 (q, *J* = 7.9 Hz, 6H).

<sup>13</sup>C NMR (100 MHz, CDCl<sub>3</sub>,  $\delta$ ): 159.7, 147.1, 137.9, 134.0, 133.8, 132.3, 129.2, 128.9, 128.7, 128.6, 127.2, 127.1, 126.2, 118.4, 112.8, 111.3, 75.2, 55.3, 44.8, 7.0, 5.0.

IR (NaCl, thin film): 3027, 2954, 2910, 2876, 2835, 1601, 1587, 1488, 1456, 1435, 1359, 1320, 1284, 1263, 1153, 1083, 1050, 1006, 966, 943, 825, 779, 743, 699.

HRMS–ESI (*m/z*): [M+Na]<sup>+</sup> calcd for C<sub>23</sub>H<sub>32</sub>O<sub>2</sub>SiNa, 391.2069; found, 391.1750.

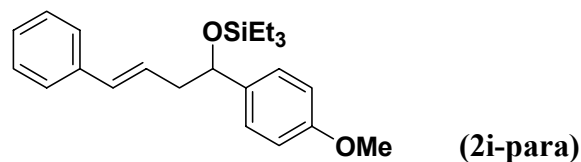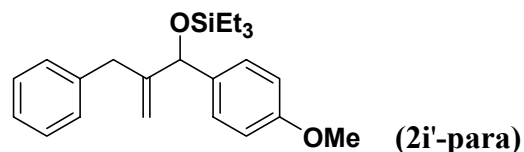

The reaction of allylbenzene and *o*-anisaldehyde (61  $\mu$ L, 0.5 mmol) with Ni(cod)<sub>2</sub>, Ph<sub>3</sub>P (52 mg, 0.2 mmol, 40 mol%) and TESOTf (197  $\mu$ L, 0.875 mmol), triethylamine in toluene following the general procedure 3 above afforded **2i-para** and **2i'-para** in 99% total yield according to <sup>1</sup>H NMR of the crude mixture and the ratio of **2i-para**:**2i'-para** is 92:8. The *E* / *Z* ratio of **2i-para** is >95:5. Purification via flash chromatography on silica afforded **2i-para** as a colorless oil. **2i'-para** was not isolated.

In another experiment, general procedure 3 was followed, except that the reaction was carried out in five fold larger scale. The reaction was heated at 35 °C and 9 mL toluene was used as the solvent. This reaction afforded **2i-para** and **2i'-para** in 98% total yield according to <sup>1</sup>H NMR of the crude mixture and the ratio of **2i-para**:**2i'-para** is 92:8. The *E* / *Z* ratio of **2i-para** is >95:5. Purification via flash chromatography on silica afforded **2i-para** as a colorless oil. **2i'-para** was not isolated.

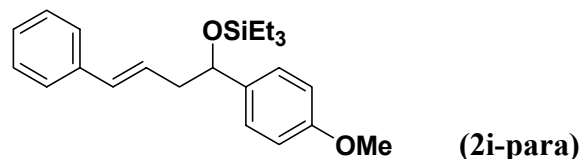

<sup>1</sup>H NMR (400 MHz, CDCl<sub>3</sub>,  $\delta$ ): 7.49 (m, 7H); 7.00 (d, *J* = 8.6 Hz, 2H); 6.52 (d, *J* = 15.9 Hz, 1H); 6.35 (dt, *J* = 7.2, 15.9 Hz, 1H); 4.85 (dd, *J* = 6.4, 6.4 Hz, 1H); 3.89 (s, 3H); 2.63-2.81 (m, 2H); 1.04 (t, *J* = 7.8 Hz, 9H); 0.70 (q, *J* = 7.8 Hz, 6H).

<sup>13</sup>C NMR (100 MHz, CDCl<sub>3</sub>,  $\delta$ ): 159.0, 138.1, 137.7, 132.3, 128.7, 127.5, 127.3, 127.2, 126.3, 113.7, 75.0, 55.4, 45.1, 7.1, 5.2.

IR (NaCl, thin film): 3027, 2954, 2910, 2875, 1612, 1511, 1414, 1302, 1248, 1171, 1081, 1005, 966, 836, 743, 693.

HRMS-ESI (*m/z*): [M + Na]<sup>+</sup> calcd for C<sub>23</sub>H<sub>32</sub>O<sub>2</sub>SiNa, 391.2069; found, 391.2057.



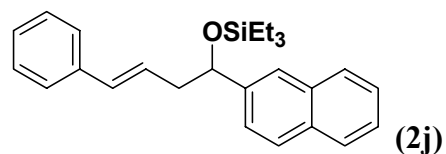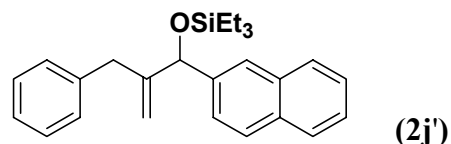

The reaction of allylbenzene and naphthaldehyde (78 mg, 0.5 mmol) with Ni(cod)<sub>2</sub>, Ph<sub>3</sub>P (52 mg, 0.2 mmol, 40 mol%) and TESOTf (197 μL, 0.875 mmol), triethylamine in toluene following the general procedure 3 above afforded **2j** and **2j'** in 88% total yield according to <sup>1</sup>H NMR of the crude mixture and the ratio of **2j**:**2j'** is 95:5. The *E* / *Z* ratio of **2j** is >95:5. Purification via flash chromatography on silica afforded **2j** as a colorless oil. **2j'** was subjected to TBAF and the free alcohol was isolated by flash chromatography on silica as a colorless oil.

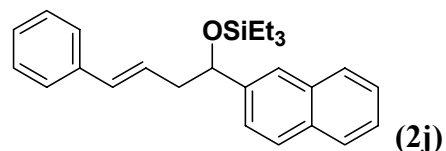

<sup>1</sup>H NMR (400 MHz, CDCl<sub>3</sub>, δ): 7.90-7.96 (m, 4H); 7.67 (d, *J* = 1.6 Hz, 1H); 7.60-7.65 (m, 2H); 7.30-7.59 (m, 5H); 6.54 (d, *J* = 15.9 Hz, 1H); 6.36 (dt, *J* = 7.2, 15.9 Hz, 1H); 5.05 (dd, *J* = 5.4, 7.2 Hz, 1H); 2.74-2.89 (m, 2H); 1.03 (t, *J* = 8.0 Hz, 9H); 0.70 (dq, *J* = 2.9, 8.0 Hz, 6H).

<sup>13</sup>C NMR (100 MHz, CDCl<sub>3</sub>, δ): 142.9, 137.9, 133.4, 133.1, 132.4, 128.7, 128.1, 128.1, 127.9, 127.1, 126.2, 126.1, 125.7, 124.6, 75.5, 44.9, 7.0, 5.1.

IR (NaCl, thin film): 3026, 2954, 2910, 2875, 1507, 1496, 1457, 1239, 1123, 1083, 1005, 965, 819, 744.

HRMS-ESI (*m/z*): [M + Na]<sup>+</sup> calcd for C<sub>26</sub>H<sub>32</sub>OSiNa, 411.2120; found, 411.2167.

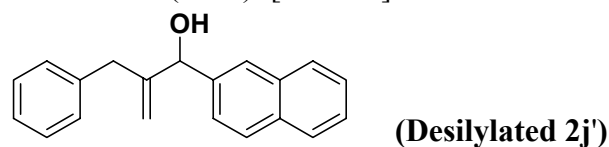

<sup>1</sup>H NMR (400 MHz, CDCl<sub>3</sub>, δ): 7.86-7.88 (m, 4H); 7.48-7.55 (m, 3H); 7.20-7.36 (m, 3H); 7.13-7.16 (m, 2H); 5.43 (s, 1H); 5.32 (s, 1H); 4.97 (s, 1H); 3.41 (d, *J* = 15.6 Hz, 1H), 3.16 (d, *J* = 15.6 Hz, 1H), 2.02 (brs, 1H).

<sup>13</sup>C NMR (100 MHz, CDCl<sub>3</sub>, δ): 150.5, 149.2, 139.4, 139.3, 133.4, 133.3, 129.4, 128.6, 128.2, 127.9, 126.4, 126.4, 126.2, 126.0, 124.9, 112.8, 77.4, 39.2.

IR (NaCl, thin film): 3365, 3058, 2923, 1495, 1453, 1031, 908, 819, 745, 700.

HRMS-ESI (*m/z*): [M + Na]<sup>+</sup> calcd for C<sub>20</sub>H<sub>18</sub>ONa, 297.1255; found, 297.1260.

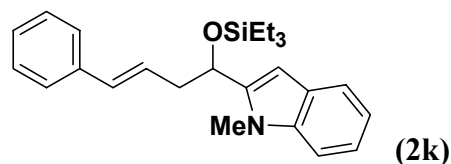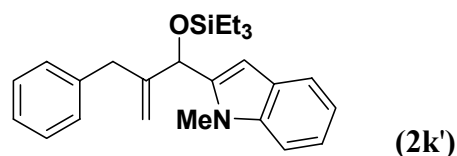

The reaction of allylbenzene and 1-methyl-2-indolecarboxaldehyde (79.6 mg, 0.5 mmol) with Ni(cod)<sub>2</sub>, Ph<sub>3</sub>P (52 mg, 0.2 mmol, 40 mol%) and TESOTf (197 μL, 0.875 mmol), triethylamine in toluene following the general procedure 3 above afforded **2k** in 57% total yield according to <sup>1</sup>H NMR of the crude mixture and the ratio of **2k**:**2k'** is >95:5. The *E* / *Z* ratio of **2k** is >95:5. **2k'** was not detected. **2k** was subjected to TBAF and the free alcohols were isolated by flash chromatography on silica (buffered with Et<sub>3</sub>N) as colorless oils.

In another experiment, the reaction of allylbenzene and 1-methyl-2-indolecarboxaldehyde (79.6 mg, 0.5 mmol) with Ni(cod)<sub>2</sub>, Cy<sub>2</sub>PhP (56mg, 0.2 mmol, 40 mol%) and TESOTf (197 μL, 0.875 mmol), triethylamine in toluene following the general procedure 3 above afforded **2k'** and **2k** in 56% total yield according to <sup>1</sup>H NMR of the crude mixture and the ratio of **2k'**:**2k** is 80:20. The *E* / *Z* ratio of **2k** is >95:5. Both **2k'** and **2k** were subjected to TBAF and the free alcohols were isolated by flash chromatography on silica (buffered with Et<sub>3</sub>N) as colorless oils.

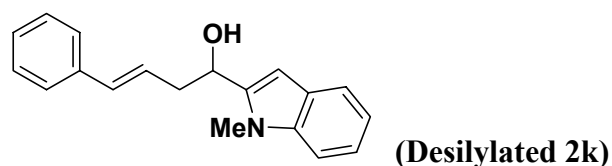

<sup>1</sup>H NMR (400 MHz, CDCl<sub>3</sub>, δ): 7.63 (d, *J* = 7.8 Hz, 1H); 7.20-7.41 (m, 7H); 7.14 (t, *J* = 7.8 Hz, 1H); 6.62 (d, *J* = 15.8 Hz, 1H); 6.55 (s, 1H); 6.34 (dt, *J* = 7.3, 15.8 Hz, 1H); 5.01 (m, 1H); 3.86 (s, 3H); 2.93-2.99 (m, 2H); 1.93 (brs, 1H).

<sup>13</sup>C NMR (100 MHz, CDCl<sub>3</sub>, δ): 149.2, 141.3, 138.1, 137.2, 133.8, 128.7, 127.6, 126.4, 125.7, 122.1, 121.0, 119.8, 109.3, 99.4, 66.9, 40.2, 30.4.

IR (NaCl, thin film): 3640, 3026, 2953, 2910, 2875, 1467, 1339, 1237, 1073, 1006, 966, 744.

HRMS-ESI (*m/z*): [M + Na]<sup>+</sup> calcd for C<sub>19</sub>H<sub>19</sub>ONNa, 300.1364; found, 300.1365.

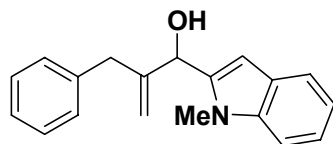

**(Desilylated 2k)**

<sup>1</sup>H NMR (400 MHz, CDCl<sub>3</sub>, δ): 7.63 (d, 1H); 7.12-7.38 (m, 8H); 6.49 (s, 1H); 5.38 (s, 1H); 5.31 (s, 1H); 5.14 (s, 1H); 3.70 (s, 3H); 3.54 (d, *J* = 15.3 Hz, 1H); 3.33 (d, *J* = 15.3 Hz, 1H); 1.98 (d, *J* = 5.1 Hz, 1H).

<sup>13</sup>C NMR (100 MHz, CDCl<sub>3</sub>, δ): 148.7, 139.6, 139.1, 138.4, 129.3, 128.6, 127.3, 126.6, 122.0, 121.0, 119.7, 113.2, 109.3, 101.5, 69.6, 40.2, 30.3.

IR (NaCl, thin film): 3349, 3059, 3027, 2923, 1649, 1601, 1494, 1468, 1453, 1318, 1234, 1030, 968, 907, 751, 737, 700.

HRMS-ESI (*m/z*): [M + Na]<sup>+</sup> calcd for C<sub>19</sub>H<sub>19</sub>NONa, 300.1364; found, 300.1369.

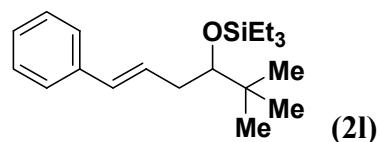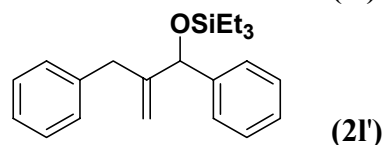

The reaction of allylbenzene and pivaldehyde (55  $\mu$ L, 0.5 mmol) with Ni(cod)<sub>2</sub>, Ph<sub>3</sub>P (52 mg, 0.2 mmol, 40 mol%) and TESOTf (197  $\mu$ L, 0.875 mmol), triethylamine in toluene following the general procedure 3 above afforded **2I** in 65% total yield according to <sup>1</sup>H NMR of the crude mixture and the ratio of **2I**:**2I'** is >95:5. The *E* / *Z* ratio of **2I** is 78:22. **2I'** was not detected. Purification via flash chromatography on silica afforded **2I** as a colorless oil.

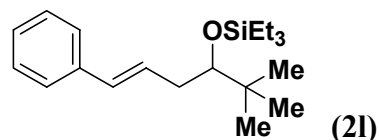

<sup>1</sup>H NMR (400 MHz, CDCl<sub>3</sub>,  $\delta$ ): 7.22–7.40 (m, 5H); 6.43 (d, *J* = 15.9 Hz, 1H); 6.32 (dt, *J* = 7.1, 15.9 Hz, 1H); 3.50 (dd, *J* = 3.4, 7.7 Hz, 1H); 2.49–2.55 (m, 1H), 2.28–2.35 (m, 1H), 1.00 (t, *J* = 8.0 Hz, 9H); 0.96 (s, 9H); 0.64 (q, *J* = 8.0 Hz, 6H).

<sup>13</sup>C NMR (100 MHz, CDCl<sub>3</sub>,  $\delta$ ): 138.1, 131.3, 129.7, 128.7, 127.0, 126.1, 81.0, 37.4, 36.2, 26.6, 7.3, 5.7.

HRMS–ESI (*m/z*): [M+Na]<sup>+</sup> calcd for C<sub>20</sub>H<sub>34</sub>OSiNa, 341.2277; found, 341.2263.

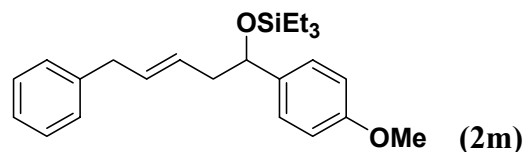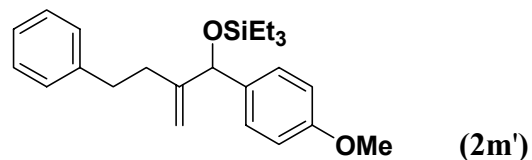

The reaction of 4-phenyl-1-butene and *o*-anisaldehyde (61  $\mu$ L, 0.5 mmol) with Ni(cod)<sub>2</sub>, Ph<sub>3</sub>P (52 mg, 0.2 mmol, 40 mol%) and TESOTf (197  $\mu$ L, 0.875 mmol), triethylamine in toluene following the general procedure 3 above afforded **2m** and **2m'** in 91% total yield according to <sup>1</sup>H NMR of the crude mixture and the ratio of **2m**:**2m'** is 92:8. The *E* / *Z* ratio of **2m** is 68:32. Purification via flash chromatography on silica afforded **2m** and **2m'** as colorless oils.

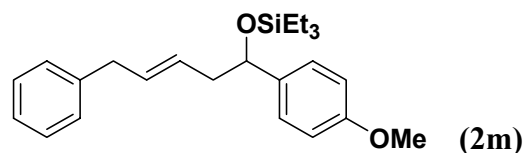

<sup>1</sup>H NMR (400 MHz, CDCl<sub>3</sub>,  $\delta$ ): 7.13–7.42 (m, 7H), 6.92 (d, *J* = 8.7 Hz, 2H), 5.49–5.69 (m, 2H), 4.76 (t, *J* = 6.3 Hz, 0.33 H), 4.70 (t, *J* = 6.4 Hz, 0.67 H), 3.87 (s, 3H), 3.37–3.39 (m, 2H), 2.35–2.81 (m, 2H), 0.96 (t, *J* = 7.9 Hz, 6H); 0.60 (q, *J* = 7.9 Hz, 9H).

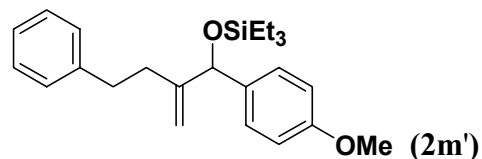

<sup>1</sup>H NMR (400 MHz, CDCl<sub>3</sub>,  $\delta$ ): 7.13–7.42 (m, 7H), 6.93 (d, *J* = 8.7 Hz, 2H), 5.34 (s, 1H), 5.19 (s, 1H), 5.00 (s, 1H), 3.86 (s, 3H), 2.61–2.79 (m, 2H), 2.26–2.42 (m, 1H), 2.16–2.22 (m, 1H), 1.07 (t, *J* = 7.8 Hz, 9H); 0.74 (q, *J* = 7.9 Hz, 6H).

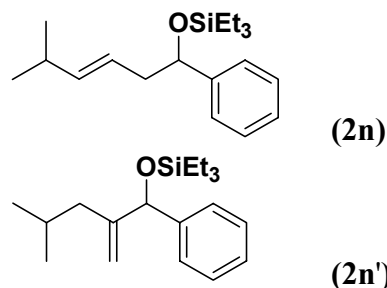

The reaction of 4-methyl-1-pentene and *o*-anisaldehyde (61  $\mu\text{L}$ , 0.5 mmol) with  $\text{Ni}(\text{cod})_2$ ,  $\text{EtOPh}_2\text{P}$  (43  $\mu\text{l}$ , 0.2 mmol, 40 mol%) and  $\text{TESOTf}$  (197  $\mu\text{L}$ , 0.875 mmol), triethylamine in toluene following the general procedure 3 above afforded **2n** and **2n'** in 82% total yield according to  $^1\text{H}$  NMR of the crude mixture and the ratio of **2n**:**2n'** is >95:5. The *E* / *Z* ratio of **2n** is 81:19. **2n'** was not detected. Purification via flash chromatography on silica afforded **2n** as a colorless oil.

In another experiment, a 10 mL round bottom flask and a stir bar were oven-dried and brought into a glove box.  $\text{Ni}(\text{cod})_2$  (27.5 mg, 0.2 mmol, 20 mol%) and dicyclohexylphenylphosphine (55 mg, 0.4 mmol, 40 mol%) were added to the round bottom flask, the flask was sealed with a septum, and the sealed flask was brought out of the glove box and connected to an argon line. The catalyst mixture was dissolved in toluene (2.5 mL) under argon and stirred 5 min at room temperature. 4-methyl-1-pentene (633  $\mu\text{L}$ , 5 mmol, 1000 mol%) was added. Triethylamine (418  $\mu\text{L}$ , 3 mmol, 600 mol%) was added. Benzaldehyde (51  $\mu\text{L}$ , 0.5 mmol, 100 mol%) was added to the reaction mixture, followed by  $\text{TESOTf}$  (197  $\mu\text{L}$ , 0.875 mmol, 175 mol%). The mixture was stirred at room temperature for 14 h. The mixture was filtered through a plug of silica gel. Solvent was removed under reduced pressure and NMR of the crude mixture indicated the ratio of **2n'**:**2n** is 75:25. Purification via flash chromatography on silica afforded **2n'** in 44% isolated yield as a colorless oil and **2n** in 10% isolated yield.

This reaction can be run according to general procedure 3, which also afforded **2n'** and **2n** in similar yield.

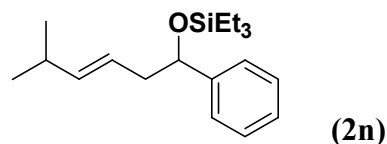

$^1\text{H NMR}$  (400 MHz,  $\text{CDCl}_3$ ,  $\delta$ ): 7.30 (m, 5H); 5.40 (m, 2H); 4.63 (dd,  $J = 5.3, 7.3$  Hz, 1H); 2.41 (quintet,  $J = 5.3$  Hz, 1H); 2.30 (quintet,  $J = 5.5$  Hz, 1H); 2.24 (septet,  $J = 6.7$  Hz, 1H); 2.00 (m, 2H); 0.95 (dd,  $J = 6.7, 7.6$  Hz, 6H); 0.89 (t,  $J = 7.9$  Hz, 9H); 0.62 (q,  $J = 7.9$  Hz, 6H).

$^{13}\text{C NMR}$  (100 MHz,  $\text{CDCl}_3$ ,  $\delta$ ): 145.6, 140.2, 128.1, 127.0, 126.1, 123.7, 75.7, 44.5, 31.3, 22.6, 7.01, 5.0.

HRMS-ESI ( $m/z$ ):  $[\text{M} + \text{Na}]^+$  calcd for  $\text{C}_{19}\text{H}_{32}\text{OSiNa}$ , 327.212; found, 327.212.

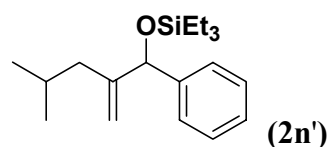

$^1\text{H NMR}$  (400 MHz,  $\text{CDCl}_3$ ,  $\delta$ ): 7.36 (d,  $J = 7.8$  Hz, 2H); 7.32 (t,  $J = 7.1$  Hz, 2H); 7.25 (t,  $J = 7.1$ , 1H); 5.30 (bs, 1H); 5.12 (bs, 1H); 4.87 (bs, 1H); 1.65 – 1.85 (m, 3H); 0.93 (t,  $J = 8.0$  Hz, 9H); 0.84 (d,  $J = 6.4$  Hz, 3H); 0.82 (d,  $J = 6.2$  Hz, 3H); 0.60 (dq,  $J = 1.3, 8.3$  Hz, 6H).

$^{13}\text{C NMR}$  (100 MHz,  $\text{CDCl}_3$ ,  $\delta$ ): 150.5, 143.7, 128.1, 127.1, 126.7, 110.7, 77.9, 41.1, 26.3, 23.0, 22.6, 7.0, 5.0.

IR (NaCl, thin film): 2955, 2877, 1646, 1454, 1088, 1067, 743.

HRMS-ESI ( $m/z$ ):  $[\text{M} + \text{Na}]^+$  calcd for  $\text{C}_{19}\text{H}_{32}\text{OSiNa}$ , 327.211; found, 327.212.

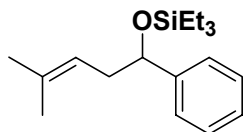

**Triethyl-(4-methyl-1-phenyl-pent-3-enyloxy)-silane (2o).**

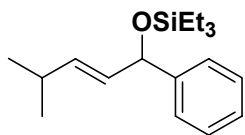

**Triethyl-(4-methyl-1-phenyl-pent-2-enyloxy)-silane (2o').**

The reaction of 3-methyl-1-butene and benzaldehyde (51  $\mu$ L, 0.5 mmol) with Ni(cod)<sub>2</sub>, EtOPh<sub>2</sub>P (43  $\mu$ l, 0.2 mmol, 40 mol%) and TESOTf (197  $\mu$ L, 0.875 mmol), triethylamine in toluene following the general procedure 3 above afforded **2o** and **2o'** in 95% total yield according to <sup>1</sup>H NMR of the crude mixture and the ratio of **2o**:**2o'** is 86:14. The *E* / *Z* ratio of **2o'** is >95:5. Purification via flash chromatography on silica afforded **2o**. **2o'** was not isolated.

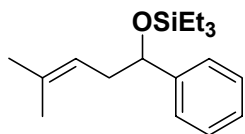

**(2o)**

<sup>1</sup>H NMR (400 MHz, CDCl<sub>3</sub>,  $\delta$ ): 7.27-7.43 (m, 5H); 5.19-5.24 (m, 1H); 4.68 (dd, *J* = 5.8, 7.2 Hz, 1H); 2.36-2.54 (m, 2H); 1.74 (d, *J* = 0.8 Hz, 3H); 1.58 (s, 3H); 0.95 (t, *J* = 7.8 Hz, 9H); 0.60 (dq, *J* = 3.4, 7.8 Hz, 6H).

<sup>13</sup>C NMR (100 MHz, CDCl<sub>3</sub>,  $\delta$ ): 145.8, 133.6, 128.1, 127.0, 126.1, 121.0, 75.4, 40.0, 26.0, 18.0, 7.0, 5.0.

IR (NaCl, thin film): 3028, 2956, 2877, 2912, 1454, 1414, 1377, 1239, 1089, 1069, 1005, 941, 744, 699.

HRMS-ESI (*m/z*): [M + Na]<sup>+</sup> calcd for C<sub>18</sub>H<sub>30</sub>OSiNa, 313.1964; found, 313.1966.



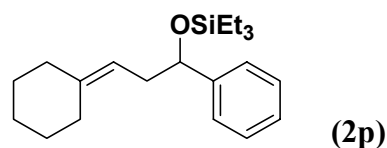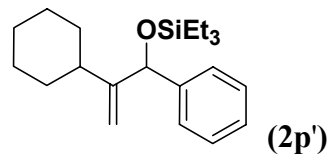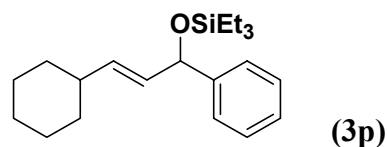

The reaction of vinylcyclohexane and benzaldehyde (51  $\mu\text{L}$ , 0.5 mmol) with  $\text{Ni}(\text{cod})_2$ ,  $\text{EtOPh}_2\text{P}$  (43  $\mu\text{L}$ , 0.2 mmol, 40 mol%) and  $\text{TESOTf}$  (197  $\mu\text{L}$ , 0.875 mmol), triethylamine in toluene following the general procedure 3 above afforded **2p** and **3p** in 99% total yield according to  $^1\text{H}$  NMR of the crude mixture and the ratio of **2p**:**3p** is 75:25. The *E* / *Z* ratio of **3p** is >95:5. Purification via flash chromatography on silica afforded a mixture of **2p** and **3p**.

In another experiment, a 10 mL round bottom flask and a stir bar were oven-dried and brought into a glove box.  $\text{Ni}(\text{cod})_2$  (27.5 mg, 0.2 mmol, 20 mol%) and dicyclohexylphenylphosphine (55 mg, 0.4 mmol, 40 mol%) were added to the round bottom flask, the flask was sealed with a septum, and the sealed flask was brought out of the glove box and connected to an argon line. The catalyst mixture was dissolved in toluene (2.5 mL) under argon and stirred 5 min at room temperature. Vinylcyclohexane (856  $\mu\text{L}$ , 6.25 mmol, 1250 mol%) was added. Triethylamine (418  $\mu\text{L}$ , 3 mmol, 600 mol%) was added. Benzaldehyde (51  $\mu\text{L}$ , 0.5 mmol, 100 mol%) was added, followed by  $\text{TESOTf}$  (197  $\mu\text{L}$ , 0.875 mmol, 175 mol%). The mixture was stirred at room temperature for 16 h. The mixture was filtered through a plug of silica gel.  $^1\text{H}$  NMR of the crude mixture indicated that **2p'** is the minor product, along with homoallylic product **2p** and 1,3-disubstituted allylic product **3p** as major products. Purification via flash chromatography on silica afforded **2p'** in 5% isolated yield as a colorless oil.

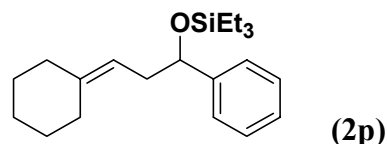

$^1\text{H}$  NMR (400 MHz,  $\text{CDCl}_3$ ,  $\delta$ ): 7.24-7.42 (m, 5H); 5.14 (t,  $J = 7.4$  Hz, 1H); 4.66 (t,  $J = 6.4$  Hz, 1H); 2.37-2.52 (m, 2H); 2.00-2.11 (m, 3H); 1.50-1.78 (m, 3H); 1.03-1.48 (m, 4H); 0.94 (t,  $J = 7.9$  Hz, 9H); 0.59 (dq,  $J = 2.8, 7.9$  Hz, 6H).

$^{13}\text{C}$  NMR (100 MHz,  $\text{CDCl}_3$ ,  $\delta$ ): 145.7, 141.6, 128.0, 127.0, 126.2, 117.5, 75.6, 39.0, 37.5, 29.0, 28.7, 27.8, 27.1, 7.0, 5.0.

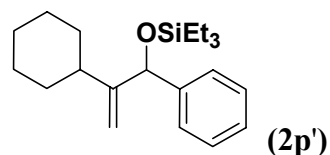

$^1\text{H}$  NMR (400 MHz,  $\text{CDCl}_3$ ,  $\delta$ ): 7.33 (d,  $J = 8.6$  Hz, 2H); 7.29 (t,  $J = 7.9$ , 2H); 7.22 (t,  $J = 7.0$  Hz, 1H); 5.23 (dd,  $J = 1.3, 1.3$  Hz, 1H); 5.14 (s, 1H); 4.90 (s, 1H); 1.2 – 2.0 (m, 11H); 0.91 (t,  $J = 7.9$  Hz, 9H); 0.58 (dq,  $J = 0.5, 7.8$  Hz, 6H).

$^{13}\text{C}$  NMR (125 MHz,  $\text{CDCl}_3$ ,  $\delta$ ): 157.7, 143.7, 128.0, 127.1, 126.9, 108.2, 77.6, 39.5, 34.5, 33.5, 27.1, 27.0, 26.5, 7.1, 5.0.

IR (NaCl, thin film): 2954, 2927, 2876, 1644, 1493, 1449, 1239, 1090, 858, 699.

HRMS-ESI ( $m/z$ ):  $[\text{M} + \text{Na}]^+$  calcd for  $\text{C}_{21}\text{H}_{34}\text{OSiNa}$ , 353.227; found, 353.227.

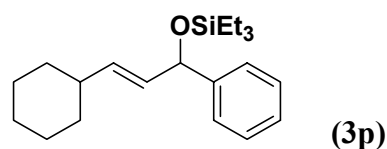

$^1\text{H}$  NMR (400 MHz,  $\text{CDCl}_3$ ,  $\delta$ ): 7.24-7.42 (m, 5H); 5.69 (dd,  $J = 6.5, 15.4$  Hz, 1H); 5.56 (dd,  $J = 7.0, 15.4$  Hz, 1H); 5.18 (d,  $J = 7.0$  Hz, 1H); 2.00-2.11 (m, 3H); 1.63-1.78 (m, 1H); 1.50-1.78 (m, 3H); 1.03-1.48 (m, 4H); 1.00 (t,  $J = 8.0$  Hz, 9H); 0.67 (dq,  $J = 2.3, 8.0$  Hz, 6H).

$^{13}\text{C}$  NMR (100 MHz,  $\text{CDCl}_3$ ,  $\delta$ ): 144.8, 136.9, 131.2, 128.2, 126.9, 126.1, 75.9, 40.4, 33.0, 32.9, 26.4, 26.2, 7.1, 5.2.

The following IR and HRMS data is from a mixture of **2p** and **2p'**.

IR (NaCl, thin film): 2954, 2928, 2876, 2853, 1449, 1414, 1238, 1086, 1067, 1007, 969, 829, 744, 699.

HRMS-ESI ( $m/z$ ):  $[\text{M} + \text{Na}]^+$  calcd for  $\text{C}_{21}\text{H}_{34}\text{OSiNa}$ , 353.2277; found, 353.2267.

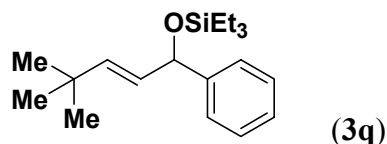

The reaction of 3,3-dimethyl-1-butene and benzaldehyde (51  $\mu\text{L}$ , 0.5 mmol) with  $\text{Ni}(\text{cod})_2$ ,  $\text{EtOPh}_2\text{P}$  (43  $\mu\text{l}$ , 0.2 mmol, 40 mol%) and  $\text{TESOTf}$  (197  $\mu\text{L}$ , 0.875 mmol), triethylamine in toluene following the general procedure 3 above afforded **3q** only in 14% total yield according to  $^1\text{H}$  NMR of the crude mixture. Purification via flash chromatography on silica afforded **3q** as a colorless oil.

$^1\text{H}$  NMR (400 MHz,  $\text{CDCl}_3$ ,  $\delta$ ): 7.30-7.41(m, 5H), 5.82 (d,  $J = 14.6$  Hz, 1H), 5.59 (dd,  $J = 14.6$ , 7.0 Hz, 1H), 5.18 (m, 1H), 1.88 (brs, 1H), 1.05 (s, 9H).  $^{13}\text{C}$  NMR (100 MHz,  $\text{CDCl}_3$ ,  $\delta$ ): 149.2, 143.8, 128.6, 127.6, 127.3, 126.4, 75.6, 33.1, 29.6.

IR (NaCl, thin film): 3657, 2954, 2876, 1457, 1238, 966, 737, 691.

HRMS-ESI ( $m/z$ ):  $[\text{M}+\text{Na}]^+$  calcd for  $\text{C}_{19}\text{H}_{32}\text{OSiNa}$ , 327.2115; found, 327.2105.

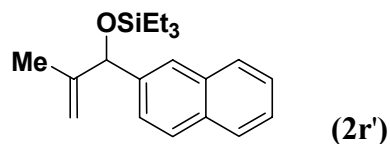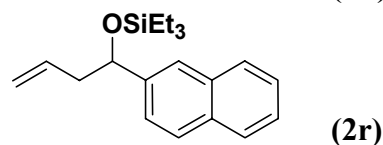

A 10 mL round bottom flask and a stir bar were oven-dried and brought into a glove box. Ni(cod)<sub>2</sub> (28 mg, 0.1 mmol, 20 mol%), dicyclohexylphenylphosphine (56 mg, 0.2 mmol, 40 mol%) and 2-naphthaldehyde (78 mg, 0.5 mmol, 100 mol%) were added to the round bottom flask, the flask was sealed with a septum, and the sealed flask was brought out of the glove box and connected to an argon line. The catalyst mixture was dissolved in toluene (2.5 mL) under argon and stirred 5 min at room temperature. The system was purged with propene for 1 min. The propene atmosphere was maintained by a propene balloon. Triethylamine (418 μL, 3 mmol, 600 mol%) was added. TESOTf (197 μL, 0.875 mmol, 175 mol%) was added. The mixture was stirred at room temperature for 6 h. The mixture was diluted with hexane and filtered through a plug of silica gel. Solvent was removed under reduced pressure. Purification via flash chromatography on silica afforded **2r'** in 73% isolated yield as a colorless oil and **2r** in 14% isolated yield as a colorless oil.

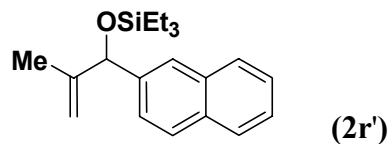

<sup>1</sup>H NMR (400 MHz, CDCl<sub>3</sub>, δ): 7.86 (m, 4H); 7.50 (m, 3H); 5.33 (s, 1H); 5.26 (s, 1H); 4.94 (s, 1H); 1.62 (s, 3H); 1.00 (t, *J* = 8.0 Hz, 9H); 0.67 (dq, *J* = 1.8, 7.9 Hz, 6H).

<sup>13</sup>C NMR (100 MHz, CDCl<sub>3</sub>, δ): 148.0, 141.0, 133.4, 133.0, 128.2, 127.8, 127.8, 126.0, 125.7, 124.9, 124.8, 78.6, 17.6, 7.1, 5.1.

IR (NaCl, thin film): 2955, 2912, 2876, 1652, 1508, 1457, 1238, 1084, 1005, 899, 742.

HRMS-ESI (*m/z*): [M + Na]<sup>+</sup> calcd for C<sub>20</sub>H<sub>28</sub>OSiNa, 335.180; found, 335.181.

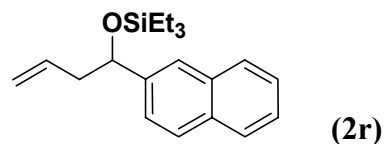

$^1\text{H}$  NMR (400 MHz,  $\text{CDCl}_3$ ,  $\delta$ ): 7.83 (t,  $J = 8.5$  Hz, 3H); 7.75 (s, 1H); 7.48 (m, 3H); 5.81 (m, 1H); 5.05 (m, 1H); 5.02 (m, 1H); 4.86 (t,  $J = 5.9$  Hz); 2.55 (m, 2H); 0.91 (t,  $J = 8.0$  Hz, 9H); 0.57 (dq,  $J = 3.5, 7.5$  Hz, 6H).

$^{13}\text{C}$  NMR (100 MHz,  $\text{CDCl}_3$ ,  $\delta$ ): 142.8, 135.3, 133.4, 133.0, 128.1, 127.9, 127.9, 126.1, 125.7, 124.6, 75.2, 45.6, 7.0, 5.0.

IR (NaCl, thin film): 2955, 2876, 1458, 1239, 1084, 1005, 914, 817, 743.

HRMS-ESI ( $m/z$ ):  $[\text{M} + \text{Na}]^+$  calcd for  $\text{C}_{20}\text{H}_{28}\text{OSiNa}$ , 335.180; found, 335.181.

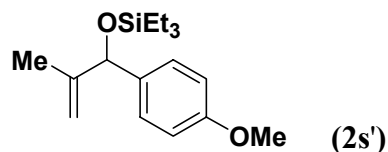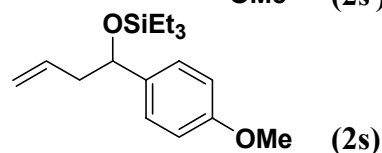

The reaction of propene (1atm, balloon) and *p*-anisaldehyde (61  $\mu\text{L}$ , 0.5 mmol) with  $\text{Ni}(\text{cod})_2$ ,  $\text{Cy}_2\text{PhP}$  (56 mg, 0.2 mmol, 40 mol%) and  $\text{TESOTf}$  (197  $\mu\text{L}$ , 0.875 mmol), triethylamine in toluene following the procedure for **2r'** above afforded **2s'** and **2s** and the ratio of **2s'**:**2s** is 82:18. Purification via flash chromatography on silica afforded **2s'** and **2s** as a colorless mixture in 95% isolated yield.

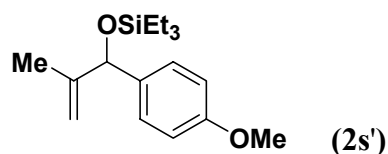

$^1\text{H}$  NMR (400 MHz,  $\text{CDCl}_3$ ,  $\delta$ ): 7.30 (d,  $J = 8.7$  Hz, 2H); 6.90 (d,  $J = 8.7$  Hz, 2H); 5.22 (s, 1H); 5.08 (s, 1H); 4.96 (s, 1H); 3.62 (s, 3H); 2.15 (s, 1H); 1.62 (s, 3H).

$^{13}\text{C}$  NMR (100 MHz,  $\text{CDCl}_3$ ,  $\delta$ ): 159.3, 147.2, 134.3, 127.9, 113.9, 110.8, 77.5, 55.4, 18.7.

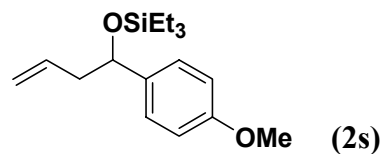

$^1\text{H}$  NMR (400 MHz,  $\text{CDCl}_3$ ,  $\delta$ ): 7.30 (d,  $J = 8.7$  Hz, 2H); 6.90 (d,  $J = 8.7$  Hz, 2H); 5.82 (m, 1H); 5.15 (m, 2H); 4.69 (t,  $J = 6.5$  Hz, 1H); 2.52 (d,  $J = 6.8$  Hz, 2H), 2.15 (s, 1H).

$^{13}\text{C}$  NMR (100 MHz,  $\text{CDCl}_3$ ,  $\delta$ ): 159.1, 136.2, 134.8, 127.3, 118.4, 113.9, 73.1, 55.4, 43.9.

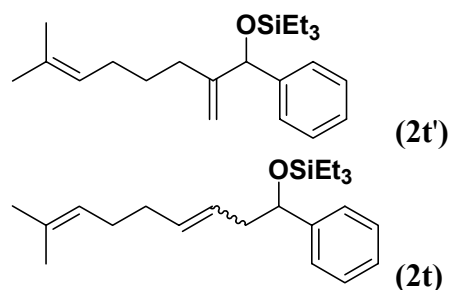

A 10 mL round bottom flask and a stir bar were oven-dried and brought into a glove box. Ni(cod)<sub>2</sub> (27.5 mg, 0.2 mmol, 20 mol%) and dicyclohexylphenylphosphine (55 mg, 0.4 mmol, 40 mol%) were added to the round bottom flask, the flask was sealed with a septum, and the sealed flask was brought out of the glove box and connected to an argon line. The catalyst mixture was dissolved in toluene (1.0 mL) under argon and stirred 5 min at room temperature. 7-methyl-1,7-octa- diene (825 μL, 5 mmol, 1000 mol%) was added. Triethylamine (418 μL, 3 mmol, 600 mol%) was added. TESOTf (197 μL, 0.875 mmol, 175 mol%) was added. Benzaldehyde (51 μL, 0.5 mmol, 100 mol%) in 1.5 mL toluene was added to the reaction mixture over 6 min. The mixture was stirred at room temperature for 18 h. The mixture was filtered through a plug of silica gel. Solvent was removed under reduced pressure and <sup>1</sup>H NMR of the crude mixture indicated the ratio of **2t'**:**2t** is 71:29. Purification via flash chromatography on silica afforded **2t'** in 50% isolated yield as a colorless oil and **2t** in 22% isolated yield as a colorless oil.

This reaction can be run according to general procedure 3, which also afforded **2t'** and **2t** in similar yield.

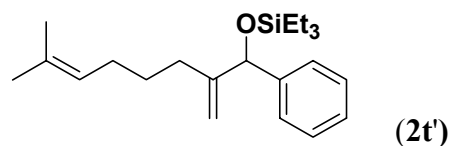

<sup>1</sup>H NMR (400 MHz, CDCl<sub>3</sub>, δ): 7.40 (d, *J* = 7.0 Hz, 2H); 7.34 (t, *J* = 7.8 Hz, 2H); 7.27 (t, *J* = 7.2, 1H); 5.26 (bs, 1H); 5.18 (bs, 1H); 5.10 (t, *J* = 7.2 Hz, 1H); 4.81 (bs, 1H); 1.76 – 2.10 (m, 4H); 1.71 (s, 3H); 1.60 (s, 3H); 1.44 (quintet, *J* = 7.7 Hz, 2H); 0.97 (t, *J* = 7.9 Hz, 9H); 0.62 (dq, *J* = 1.5, 7.9 Hz, 6H).

<sup>13</sup>C NMR (100 MHz, CDCl<sub>3</sub>, δ): 152.1, 143.7, 131.6, 128.1, 127.1, 126.6, 124.8, 109.5, 78.2, 30.4, 28.2, 28.1, 25.9, 17.8, 7.0, 5.0.

IR (NaCl, thin film): 2955, 2877, 1647, 1456, 1091, 1067, 743.

HRMS-ESI (*m/z*): [M + Na]<sup>+</sup> calcd for C<sub>22</sub>H<sub>36</sub>OSiNa, 367.243; found, 367.243.

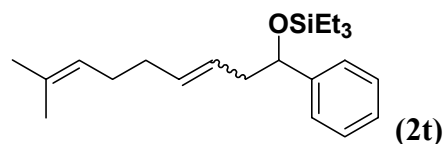

$^1\text{H}$  NMR (400 MHz,  $\text{CDCl}_3$ ,  $\delta$ ): 7.30 (m, 5H); 5.45 (m, 2H); 5.15 (t,  $J = 7.1$  Hz, 1H); 4.64 (dd,  $J = 5.4, 7.3$  Hz, 1H); 2.45 (quintet,  $J = 5.4$  Hz, 1H); 2.35 (quintet,  $J = 5.9$  Hz, 1H); 2.05 (m, 4H); 1.62 (s, 3H); 1.72 (s, 3H); 0.92 (t,  $J = 7.9$  Hz, 9H); 0.55 (dq,  $J = 1.5, 7.9$  Hz, 6H).

$^{13}\text{C}$  NMR (100 MHz,  $\text{CDCl}_3$ ,  $\delta$ ): 145.6, 132.8, 131.7, 128.1, 127.1, 126.9, 126.1, 124.4, 75.6, 44.5, 33.1, 28.2, 25.9, 17.9, 7.0, 5.0.

IR (NaCl, thin film): 2955, 2914, 2876, 1454, 1089, 1005, 969, 699.

HRMS-ESI ( $m/z$ ):  $[\text{M} + \text{Na}]^+$  calcd for  $\text{C}_{22}\text{H}_{36}\text{OSiNa}$ , 367.243; found, 367.243.



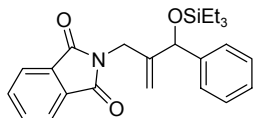

**(4a)**

The reaction of allylphthalimide (281 mg, 1.5 mmol, 300 mol%) and benzaldehyde (51  $\mu$ L, 0.5 mmol) with Ni(cod)<sub>2</sub>, dicyclohexylphenylphosphine (55 mg, 0.4 mmol, 40 mol%) and TESOTf (197  $\mu$ L, 0.875 mmol), triethylamine in toluene at 35 °C following the general procedure 3 above afforded **4a** and **4a'** in 67% total yield according to <sup>1</sup>H NMR of the crude mixture and the ratio of **4a:4a'** is 74:26. Purification via flash chromatography on silica afforded **4a** as a mixture of **4a** and the isomerized starting material.

<sup>1</sup>H NMR (400 MHz, CDCl<sub>3</sub>,  $\delta$ ): 7.77 (dd,  $J$  = 3.0, 5.4 Hz, 2H); 7.73 (dd,  $J$  = 3.0, 5.4 Hz, 2H); 7.13–7.41 (m, 5H); 5.36 (s, 1H), 5.30 (s, 1H), 4.99 (s, 1H), 4.26 (d,  $J$  = 16 Hz, 1H), 4.08 (d,  $J$  = 16 Hz, 1H), 0.91 (t,  $J$  = 7.9 Hz, 9H); 0.59 (q,  $J$  = 7.9 Hz, 6H).

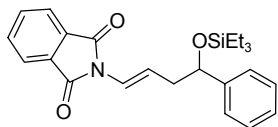

**(4a')**

The reaction of allylphthalimide (1.5 mmol, 300 mol%) and benzaldehyde (51  $\mu$ L, 0.5 mmol) with Ni(cod)<sub>2</sub>, EtOPh<sub>2</sub>P (43  $\mu$ L, 0.2 mmol, 40 mol%) and TESOTf (197  $\mu$ L, 0.875 mmol), triethylamine in toluene at 35 °C following the general procedure 3 above afforded **4a** and **4a'** in 43% total yield according to <sup>1</sup>H NMR of the crude mixture and the ratio of **4a:4a'** is 12:88. The *E* / *Z* ratio of **4a'** is 60:40. Purification via flash chromatography on silica afforded **4a'** as a mixture with the isomerized starting material.

<sup>1</sup>H NMR (400 MHz, CDCl<sub>3</sub>,  $\delta$ ): 7.86 (dd,  $J$  = 3.1, 5.4 Hz, 2H); 7.73 (dd,  $J$  = 3.1, 5.4 Hz, 2H); 7.25–7.37 (m, 5H); 6.62 (m, 2H); 4.76 (dd,  $J$  = 5.5, 6.9 Hz, 1H); 2.47–2.60 (m, 2H); 0.89 (t,  $J$  = 8.0 Hz, 9H); 0.56 (q,  $J$  = 2.8, 8.0 Hz, 6H).

<sup>13</sup>C NMR (100 MHz, CDCl<sub>3</sub>,  $\delta$ ): 166.7, 149.2, 145.0, 134.5, 131.9, 128.2, 127.3, 126.1, 123.7, 119.5, 118.8, 75.0, 43.1, 7.0, 5.0.

IR (NaCl, thin film): 2954, 2876, 1781, 1721, 1384, 1088, 1069, 715, 701.

HRMS–ESI (*m/z*): [M–OTES]<sup>+</sup> calcd for C<sub>18</sub>H<sub>14</sub>NO<sub>2</sub>Na, 276.1025; found, 276.1022.

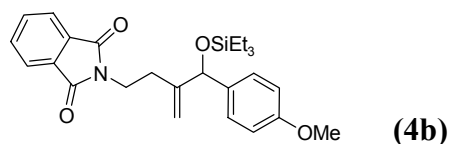

The reaction of homoallylphthalimide (1.5 mmol, 300 mol%) and *o*-anisaldehyde (61  $\mu$ L, 0.5 mmol) with Ni(cod)<sub>2</sub>, dicyclohexylphenylphosphine (55 mg, 0.4 mmol, 40 mol%) and TESOTf (197  $\mu$ L, 0.875 mmol), triethylamine in toluene at 35 °C following the general procedure 3 above afforded **4b** and **4b'** in 54% total yield according to <sup>1</sup>H NMR of the crude mixture and the ratio of **4b**:**4b'** is 71:29. Purification via flash chromatography on silica afforded **4b** and **4b'**.

<sup>1</sup>H NMR (400 MHz, CDCl<sub>3</sub>,  $\delta$ ): 7.81 (dd, *J* = 3.0, 5.4, 2H); 7.70 (dd, *J* = 3.0, 5.4, 2H); 7.26 (d, *J* = 8.7 Hz, 2H); 6.79 (d, *J* = 8.7 Hz, 2H); 5.27 (s, 1H); 5.15 (s, 1H); 4.99 (s, 1H); 3.66–3.86 (m, 2H); 3.78 (s, 3H); 2.33–2.40 (m, 1H); 2.16–2.23 (m, 1H); 0.90 (t, *J* = 7.9 Hz, 9H); 0.57 (q, *J* = 7.9 Hz, 6H).

<sup>13</sup>C NMR (100 MHz, CDCl<sub>3</sub>,  $\delta$ ): 168.4, 158.8, 148.6, 135.2, 134.0, 132.3, 127.7, 123.3, 113.5, 111.8, 77.6, 55.3, 37.2, 29.8, 7.0, 5.0.

IR (NaCl, thin film): 2954, 2876, 1773, 1715, 1511, 1467, 1431, 1395, 1354, 1247, 1078, 952, 719.

HRMS-ESI (*m/z*): [M + Na]<sup>+</sup> calcd for C<sub>26</sub>H<sub>33</sub>O<sub>4</sub>SiNa, 474.2066; found, 474.2071.

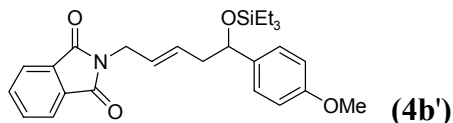

The reaction of homoallylphthalimide (1.5 mmol, 300 mol%) and *o*-anisaldehyde (61  $\mu$ L, 0.5 mmol) with Ni(cod)<sub>2</sub>, Ph<sub>3</sub>P (52 mg, 0.2 mmol, 40 mol%) and TESOTf (197  $\mu$ L, 0.875 mmol), triethylamine in toluene at 35 °C following the general procedure 3 above afforded **4b** and **4b'** in 76% total yield according to <sup>1</sup>H NMR of the crude mixture and the ratio of **4b**:**4b'** is <5:95. Treatment of **4b'** with TBAF followed by flash chromatography on silica afforded a desilylated **4b'**.

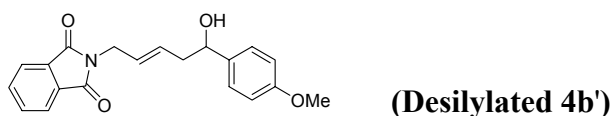

<sup>1</sup>H NMR (400 MHz, CDCl<sub>3</sub>,  $\delta$ ): 7.86 (dd,  $J$  = 3.1, 5.4 Hz, 2H); 7.73 (dd,  $J$  = 3.1, 5.4 Hz, 2H); 7.25 (d,  $J$  = 8.7 Hz, 2H); 6.84 (d,  $J$  = 8.7 Hz, 2H); 5.73(dt,  $J$  = 6.0, 15.4 Hz, 1H); 5.62 (dt,  $J$  = 6.0, 15.4 Hz, 1H); 4.68 (dd,  $J$  = 6.4, 6.4 Hz, 1H); 4.25–4.33 (m, 2H); 3.78 (s, 3H); 2.46 (m, 2H), 2.09 (brs, 1H).

<sup>13</sup>C NMR (100 MHz, CDCl<sub>3</sub>,  $\delta$ ): 168.2, 159.1, 136.1, 134.1, 132.3, 130.8, 127.2, 127.1, 123.5, 113.9, 73.1, 55.4, 42.3, 39.7.

IR (NaCl, thin film): 3466, 2929, 1770, 1711, 1611, 1512, 1395, 1249, 1174, 1034, 833, 720.

HRMS-ESI ( $m/z$ ): [M + Na]<sup>+</sup> calcd for C<sub>20</sub>H<sub>18</sub>NO<sub>3</sub>Na, 320.129; found, 320.130.

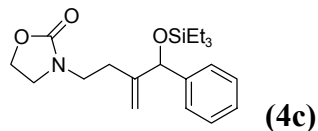

The reaction of homoallyloxazolidinone (1.5 mmol, 300 mol%) and benzaldehyde (51  $\mu\text{L}$ , 0.5 mmol) with  $\text{Ni}(\text{cod})_2$ , dicyclohexylphenylphosphine (55 mg, 0.4 mmol, 40 mol%) and TESOTf (197  $\mu\text{L}$ , 0.875 mmol), triethylamine in toluene at room temperature following the general procedure 3 above afforded **4c** and **4c'** in 60% total yield according to  $^1\text{H}$  NMR of the crude mixture and the ratio of **4c**:**4c'** is 83:17. Purification via flash chromatography on silica afforded **4c** and **4c'** as colorless oils.

$^1\text{H}$  NMR (400 MHz,  $\text{CDCl}_3$ ,  $\delta$ ): 7.23–7.38 (m, 5H); 5.31 (s, 1H); 5.20 (s, 1H); 5.00 (s, 1H); 4.16–4.21 (m, 2H); 3.19–3.36 (m, 4H); 2.02–2.26 (m, 2H); 0.93 (t,  $J = 7.9$  Hz, 9H); 0.60 (q,  $J = 7.8$  Hz, 6H).

$^{13}\text{C}$  NMR (100 MHz,  $\text{CDCl}_3$ ,  $\delta$ ): 158.4, 148.1, 143.1, 128.2, 127.4, 126.3, 112.0, 78.1, 61.8, 44.3, 42.8, 27.9, 7.0, 4.9.

IR (NaCl, thin film): 2955, 2912, 2876, 1753, 1484, 1426, 1265, 1089, 1067, 1044, 1007, 861, 744, 701.

HRMS-ESI ( $m/z$ ):  $[\text{M}+\text{Na}]^+$  calcd for  $\text{C}_{20}\text{H}_{31}\text{NO}_3\text{Na}$ , 384.1965; found, 384.1951.

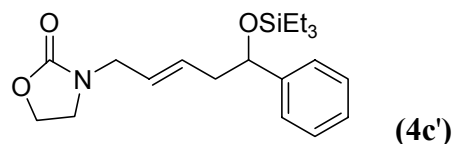

The reaction of homoallylphthalimide (1.5 mmol, 300 mol%) and benzaldehyde (51  $\mu$ L, 0.5 mmol) with Ni(cod)<sub>2</sub>, EtOPh<sub>2</sub>P (43  $\mu$ l, 0.2 mmol, 40 mol%) and TESOTf (197  $\mu$ L, 0.875 mmol), triethylamine in toluene at room temperature following the general procedure 3 above afforded **4c** and **4c'** in 28% total yield according to <sup>1</sup>H NMR of the crude mixture and the ratio of **4c**:**4c'** is 10:90. **4c'** was subjected to TBAF and purification via flash chromatography on silica afforded a desilylated **4c'**.

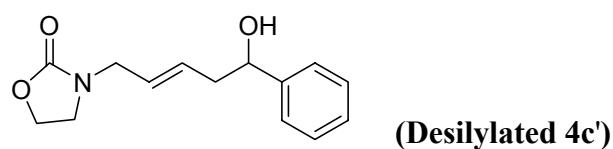

<sup>1</sup>H NMR (400 MHz, CDCl<sub>3</sub>,  $\delta$ ): 7.28–7.42 (m, 5H), 5.68 (dt,  $J$  = 5.7, 7.1 Hz, 1H), 5.49 (dt,  $J$  = 5.7, 7.1 Hz, 1H), 4.77 (dd,  $J$  = 6.7, 6.8 Hz, 1H), 4.28 (t,  $J$  = 8.0 Hz, 2H), 3.80–3.82 (m, 2H), 3.38 (dt,  $J$  = 2.5, 8.0 Hz, 2H), 2.53–2.59 (m, 2H), 2.11–2.17 (brs, 1H).

<sup>13</sup>C NMR (100 MHz, CDCl<sub>3</sub>,  $\delta$ ): 158.4, 143.9, 131.2, 128.7, 127.8, 127.3, 126.0, 73.8, 61.9, 46.4, 44.2, 42.1.

IR (NaCl, thin film): 3421, 2919, 2361, 1734, 1653, 1490, 1437, 1259, 1038, 762, 702.

HRMS–ESI (m/z): [M+Na]<sup>+</sup> calcd for C<sub>14</sub>H<sub>17</sub>NO<sub>3</sub>Na, 270.111; found, 270.110.

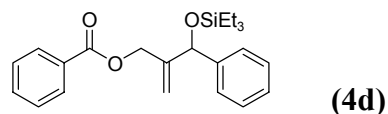

The reaction of allylbenzoate (2.5 mmol, 500 mol%) and benzaldehyde (51  $\mu$ L, 0.5 mmol) with Ni(cod)<sub>2</sub>, dicyclohexylphenylphosphine (55 mg, 0.4 mmol, 40 mol%) and TESOTf (197  $\mu$ L, 0.875 mmol), triethylamine in toluene following the general procedure 3 above afforded **4d** and **4d'** in <5% total yield according to <sup>1</sup>H NMR of the crude mixture. **4d** and **4d'** were not isolated from the reaction mixture.

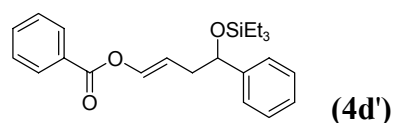

The reaction of allylbenzoate (2.5 mmol, 500 mol%) and benzaldehyde (51  $\mu$ L, 0.5 mmol) with Ni(cod)<sub>2</sub>, EtOPh<sub>2</sub>P (43  $\mu$ L, 0.2 mmol, 40 mol%) and TESOTf (197  $\mu$ L, 0.875 mmol), triethylamine in toluene at 35 °C following the general procedure 3 above afforded **4d** and **4d'** in <5% total yield according to <sup>1</sup>H NMR of the crude mixture. **4d** and **4d'** were not isolated from the reaction mixture.

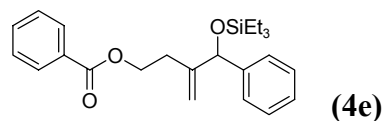

The reaction of homoallylbenzoate (1.5 mmol, 300 mol%) and benzaldehyde (51  $\mu$ L, 0.5 mmol) with Ni(cod)<sub>2</sub>, dicyclohexylphenylphosphine (55 mg, 0.4 mmol, 40 mol%) and TESOTf (197  $\mu$ L, 0.875 mmol), triethylamine in toluene at room temperature following the general procedure 3 above afforded **4e** and **4e'** in 21% total yield according to <sup>1</sup>H NMR of the crude mixture. **4e** was subjected to TBAF and the free alcohol was isolated as a colorless oil.

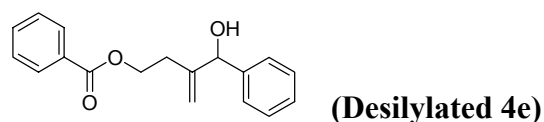

<sup>1</sup>H NMR (400 MHz, CDCl<sub>3</sub>,  $\delta$ ): 8.02 (d,  $J$  = 7.3 Hz, 2H); 7.58 (t,  $J$  = 7.3 Hz, 1H); 7.28 (m, 7H); 5.37 (s, 1H); 5.29 (s, 1H); 5.12 (s, 1H); 4.36–4.50 (m, 2H); 2.34–2.51 (m, 2H); 2.29 (brs, 1H).

<sup>13</sup>C NMR (100 MHz, CDCl<sub>3</sub>,  $\delta$ ): 166.9, 147.0, 141.8, 133.1, 130.4, 129.7, 128.7, 128.5, 128.0, 126.7, 113.3, 77.6, 63.7, 31.3.

IR (NaCl, thin film): 3447, 3063, 3030, 2961, 1717, 1701, 1451, 1316, 1276, 1117, 1071, 1026, 912, 712, 701, 668.

HRMS–ESI ( $m/z$ ): [M+Na]<sup>+</sup> calcd for C<sub>18</sub>H<sub>18</sub>O<sub>3</sub>Na, 305.1148; found, 305.1156.

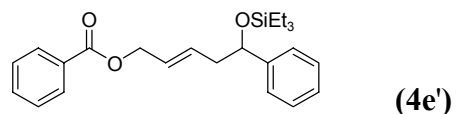

The reaction of homoallylbenzoate (1.5 mmol, 300 mol%) and benzaldehyde (51  $\mu$ L, 0.5 mmol) with Ni(cod)<sub>2</sub>, Ph<sub>3</sub>P (52 mg, 0.2 mmol, 40 mol%) and TESOTf (197  $\mu$ L, 0.875 mmol), triethylamine in toluene at 35 °C following the general procedure 3 above afforded **4e** and **4e'** in <5% total yield according to <sup>1</sup>H NMR of the crude mixture and. **4e'** was not isolated from the reaction mixture.

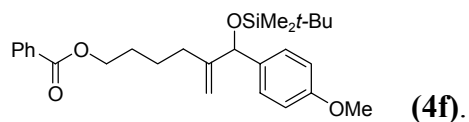

The reaction of 1-hexen-6-benzoate (510.3 mg, 2.5 mmol, 500 mol%) and *o*-anisaldehyde (61  $\mu$ L, 0.5 mmol) with Ni(cod)<sub>2</sub>, EtOPh<sub>2</sub>P (43  $\mu$ l, 0.2 mmol, 40 mol%) and TESOTf (197  $\mu$ L, 0.875 mmol, 175 mol%), triethylamine in toluene following the general procedure 3 above afforded **4f** and **4f'** in 44% total isolated yield after flash chromatography on silica and according to <sup>1</sup>H NMR of the crude mixture the ratio of **4f**:**4f'** is 73:27. **4f** and **4f'** were isolated together as a mixture.



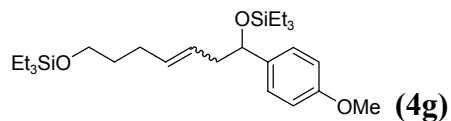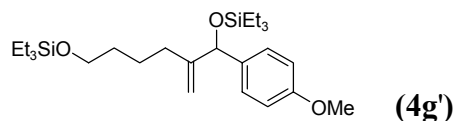

The reaction of triethyl-hex-5-enoxy-silane (1.5 mmol, 300 mol%) and *o*-anisaldehyde (61  $\mu$ L, 0.5 mmol) with Ni(cod)<sub>2</sub>, EtOPh<sub>2</sub>P (43  $\mu$ l, 0.2 mmol, 40 mol%) and TESOTf (197  $\mu$ L, 0.875 mmol, 175 mol%), triethylamine in toluene at 35 °C following the general procedure 3 above afforded **4g** and **4g'** in 66% total yield according to <sup>1</sup>H NMR of the crude mixture and the ratio of **4g**:**4g'** is 92:8. The *E* / *Z* ratio of **4g** is 50:50. **4g'** was not isolated from the mixture. **4g** were subjected to TBAF and the free diols was isolated via flash chromatography on silica as a colorless oil.

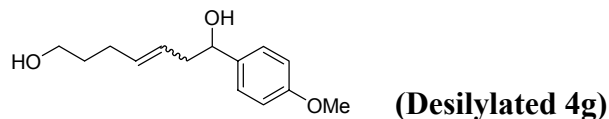

<sup>1</sup>H NMR (400 MHz, CDCl<sub>3</sub>,  $\delta$ ): 7.26–7.28 (m, 2H); 6.89 (d, *J* = 8.6 Hz, 2H); 5.41–5.63 (m, 2H), 4.70 (dd, *J* = 4.8, 8.0 Hz, 0.5 H), 4.64 (dd, *J* = 7.2, 7.2 Hz, 0.5 H), 3.81 (s, 3H), 3.60–3.65 (m, 2H), 2.39–2.62 (m, 2H), 2.10–2.27 (m, 2H), 1.89 (brs, 2H), 1.58–1.67 (m, 2H).

<sup>13</sup>C NMR (100 MHz, CDCl<sub>3</sub>,  $\delta$ ): 159.2, 159.2, 136.5, 136.4, 134.2, 132.5, 127.2, 127.2, 126.6, 126.1, 114.0, 113.9, 73.7, 73.4, 62.7, 62.0, 55.5, 42.8, 37.3, 32.3, 32.1, 29.5, 23.7.

IR (NaCl, thin film): 3354, 2933, 1612, 1513, 1442, 1303, 1247, 1175, 1035, 832.

HRMS–ESI (*m/z*): [M+Na]<sup>+</sup> calcd for C<sub>26</sub>H<sub>48</sub>O<sub>3</sub>Si<sub>2</sub>Na, 487.3040; found, 487.3017.

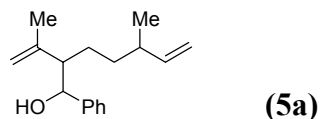

To  $\beta$ -Citronellene (0.5 mmol) in anhydrous  $\text{CH}_2\text{Cl}_2$  (5 mL) was added  $\text{Me}_2\text{AlCl}$  (1.0 M in hexane, 1.1 mL) at 0 °C. The mixture was stirred at room temperature for 24 h. The reaction was quenched by diluting the reaction mixture with diethylether, followed by slow addition of water until gas evolution ceased. The organic layer was separated, and the aqueous layer was extracted with ether twice. The combined organic layers were washed with brine, dried and evaporated in vacuo. Purification via flash chromatography on silica gel afforded the coupling product **5a** as a colorless oil. Homoallylic alcohol **5b** was not detected.

$^1\text{H}$  NMR (400 MHz,  $\text{CDCl}_3$ ,  $\delta$ ): 7.28-7.39 (m, 5H); 5.45-5.61 (m, 1H); 5.09 (s, 1H); 5.00 (s, 1H); 4.79-4.94 (m, 2H); 4.38 (dd,  $J = 0.7, 8.5$  Hz, 1H); 2.19-2.35 (m, 1H); 1.89-2.05 (m, 1H); 1.73, 1.75 (two s, 3H); 1.67 (brs, 1H); 0.91-1.27 (m, 4H); 0.87, 0.84 (two d,  $J = 6.8$  Hz, 3H).

$^{13}\text{C}$  NMR (100 MHz,  $\text{CDCl}_3$ ,  $\delta$ ): 145.1, 144.3, 142.9, 128.5, 127.9, 127.4, 127.3, 126.0, 116.5, 116.4, 113.1, 112.4, 75.5, 75.4, 56.5, 56.4, 37.8, 37.5, 34.2, 34.2, 31.2, 26.3, 21.0, 19.5, 18.3, 18.1.

HRMS-EI ( $m/z$ ):  $[\text{M}]^{++}$  calcd for  $\text{C}_{17}\text{H}_{24}\text{ONa}$ , 244.182; found, 244.182.

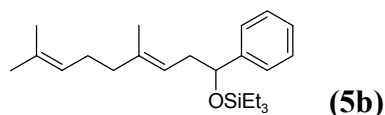

The reaction of  $\beta$ -Citronellene and benzaldehyde (51  $\mu\text{L}$ , 0.5 mmol, 100 mol%) with  $\text{Ni}(\text{cod})_2$ ,  $\text{EtOPh}_2\text{P}$  (43  $\mu\text{L}$ , 0.2 mmol, 40 mol%) and  $\text{TESOTf}$  (197  $\mu\text{L}$ , 0.875 mmol, 175 mol%), triethylamine in toluene following the general procedure 3 above afforded **5b** 75% total yield according to  $^1\text{H}$  NMR of the crude mixture and the E/Z ratio of **5b** is 71:29. **5a** was not detected. Purification via flash chromatography on silica afforded **5b** as a colorless oil.

$^1\text{H}$  NMR (400 MHz,  $\text{CDCl}_3$ ,  $\delta$ ): 7.25-7.36 (m, 5H); 5.18-5.20 (m, 1H); 5.12-5.12 (m, 1H); 4.64-4.68 (m, 1H); 2.37-2.48 (m, 2H); 2.01-2.10 (m, 4H); 1.73 (m, 4H); 1.64 (m, 3H); 1.55 (s, 2H); 0.92 (t,  $J = 6.9$  Hz, 9H); 0.57 (dq,  $J = 3.0, 6.9$  Hz, 6H).

$^{13}\text{C}$  NMR (100 MHz,  $\text{CDCl}_3$ ,  $\delta$ ): 145.8, 145.8, 137.2, 137.1, 131.7, 131.5, 128.1, 128.0, 127.0, 127.0, 126.1, 126.1, 124.6, 124.5, 121.8, 120.7, 75.5, 75.3, 40.0, 39.8, 39.7, 32.3, 26.8, 26.7, 25.9, 25.9, 23.6, 17.8, 17.8, 16.3, 7.0, 7.0, 5.0, 5.0.

IR (NaCl, thin film): 2955, 2876, 1454, 1376, 1239, 1088, 1068, 1006, 829, 743, 700.

HRMS-ESI ( $m/z$ ):  $[\text{M} + \text{Na}]^+$  calcd for  $\text{C}_{23}\text{H}_{28}\text{OSiNa}$ , 381.2590; found, 381.2583.

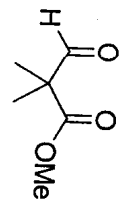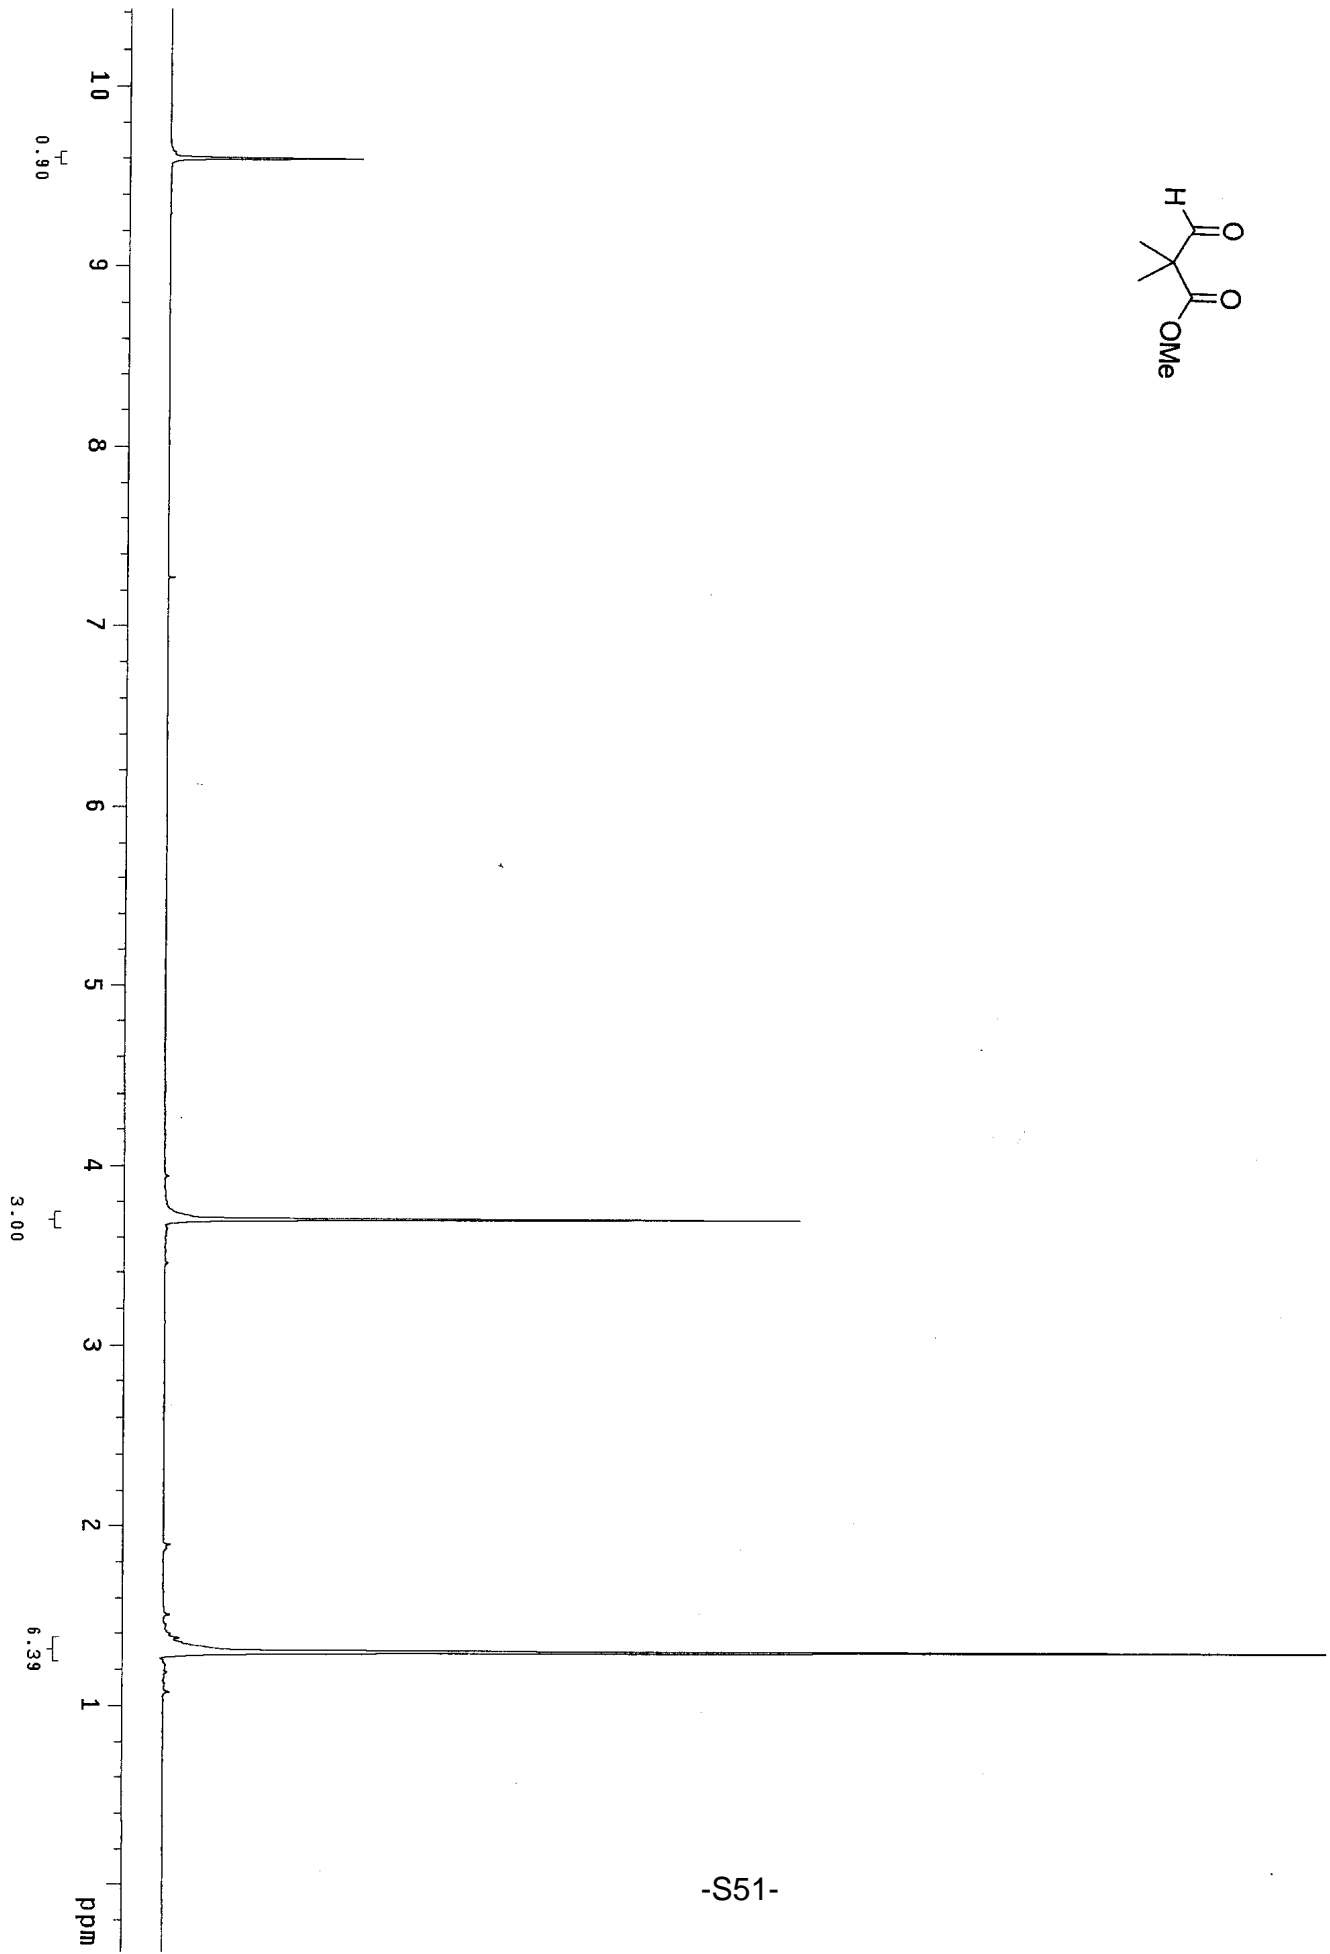

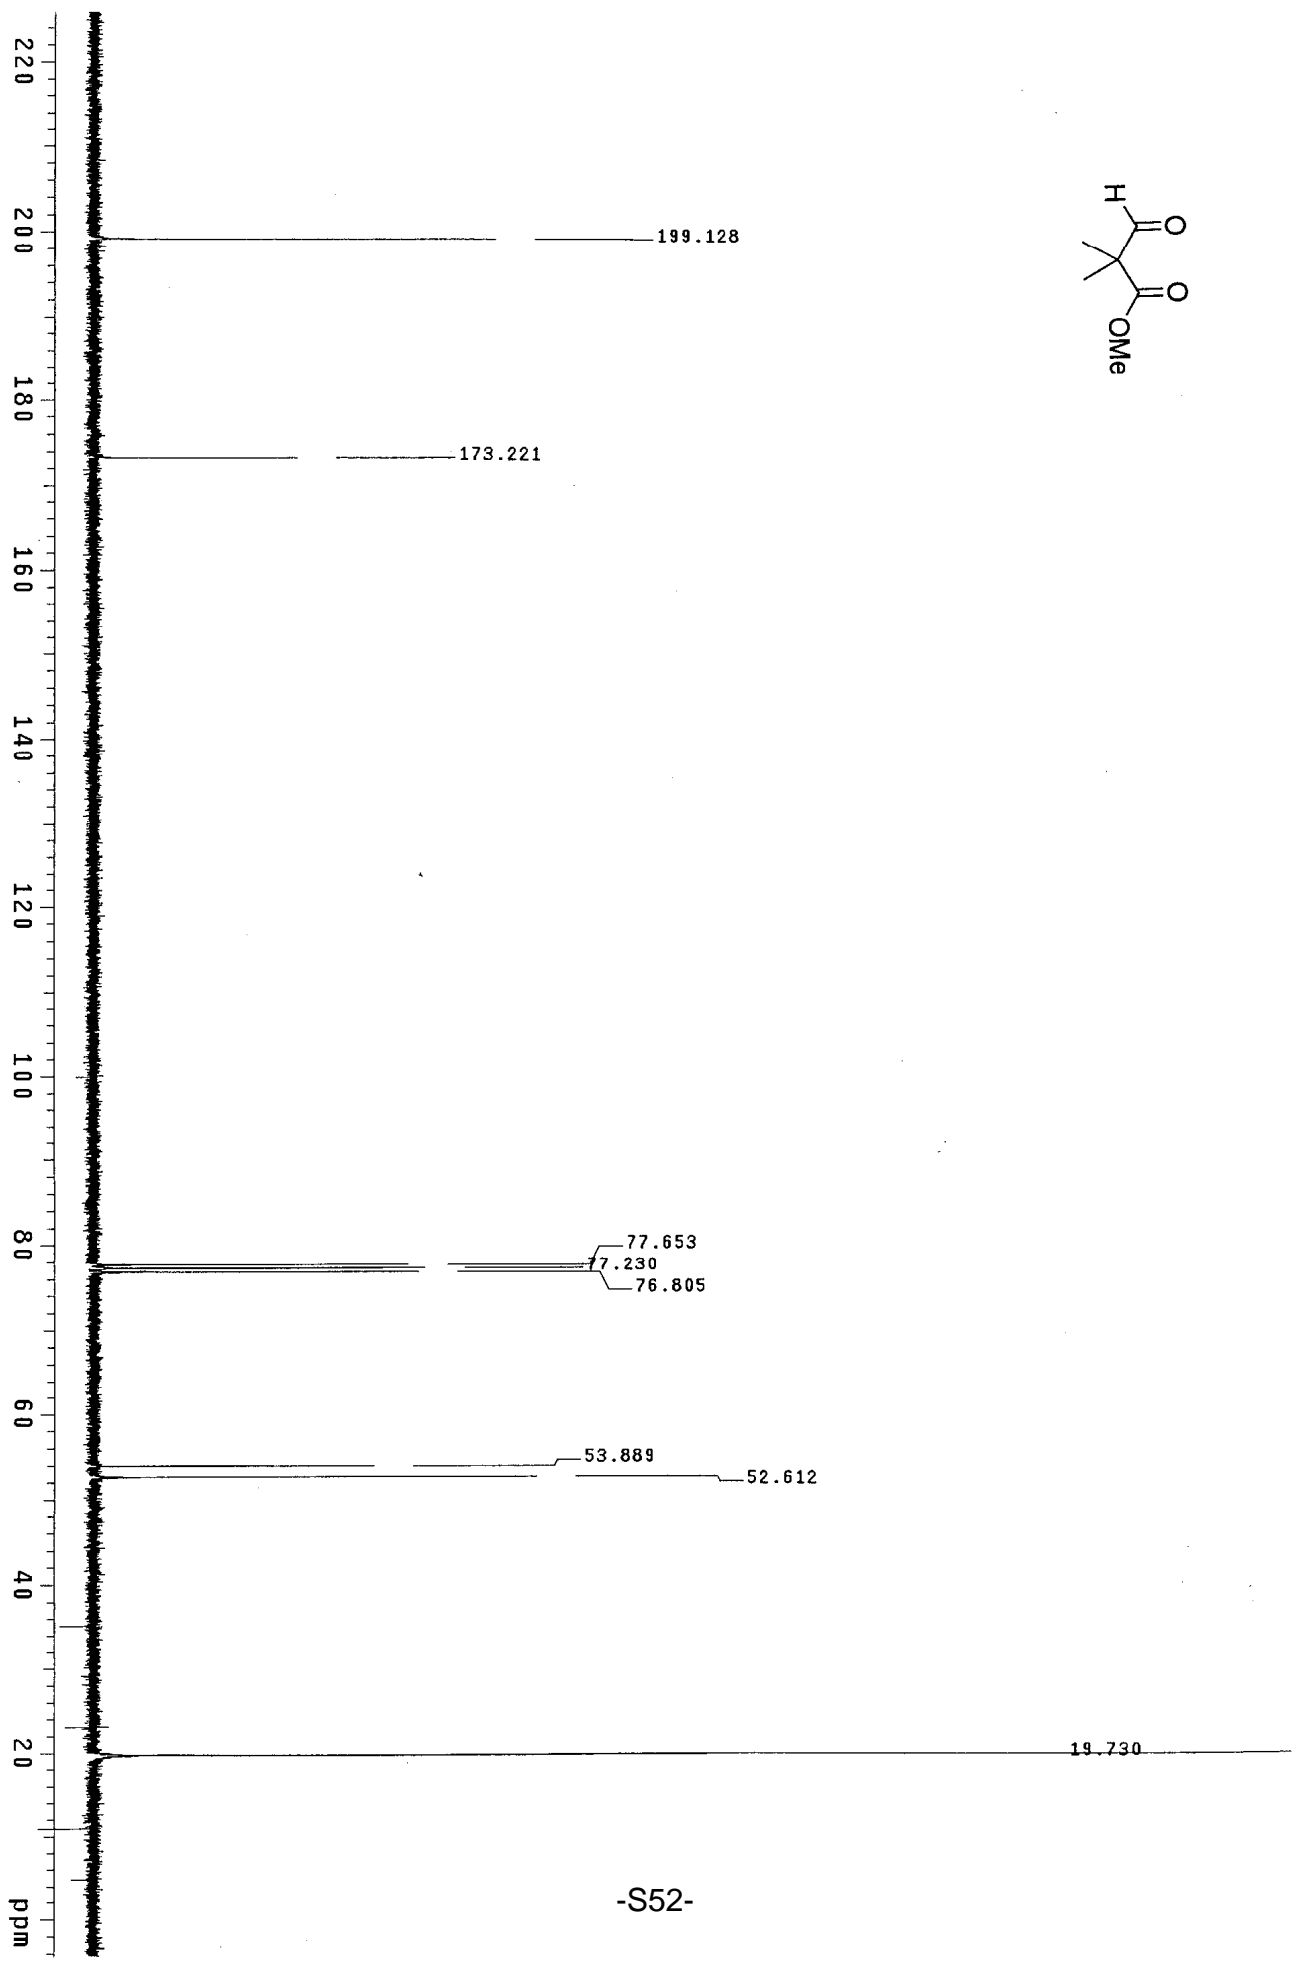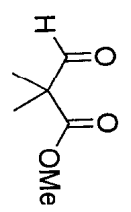

SN050690

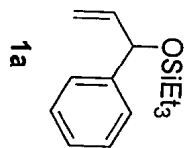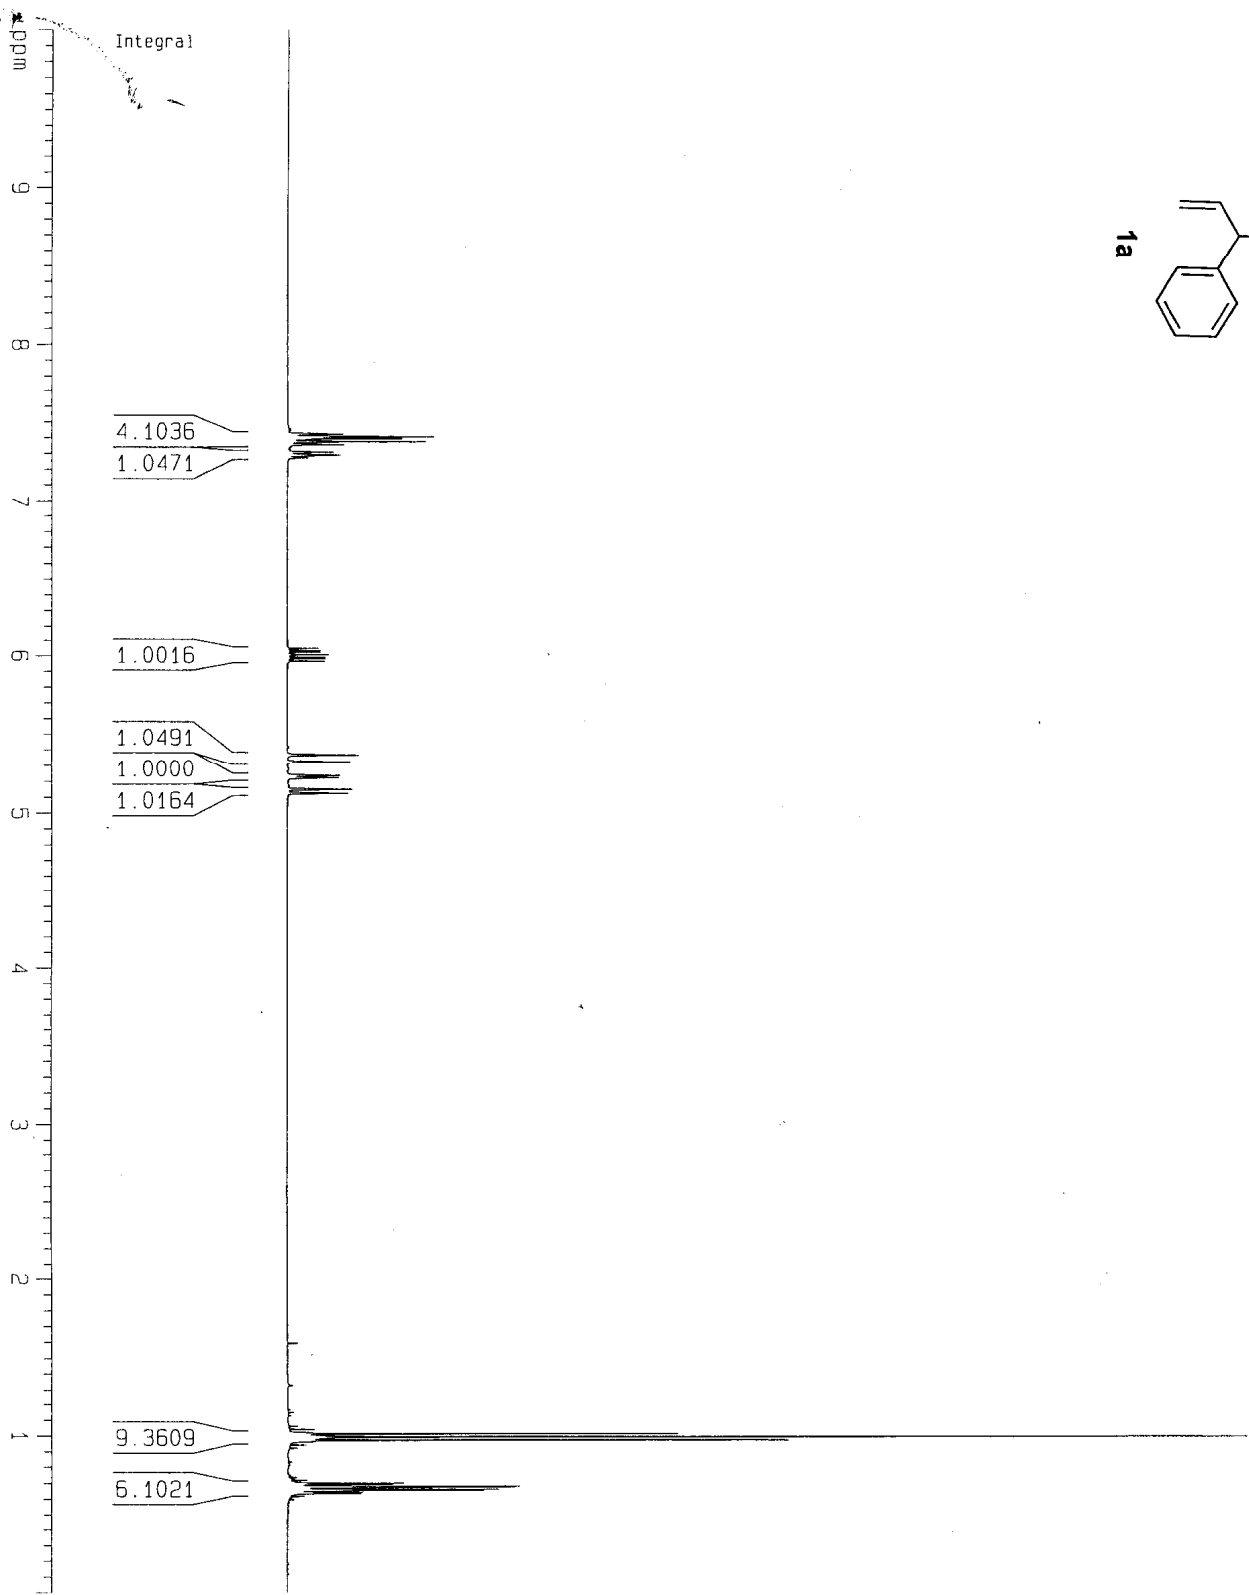

Current Data Parameters  
NAME SN690-H  
EXPNO 1  
PROCNO 1

F2 - Acquisition Parameters  
Date\_ 20050707  
Time 19.55  
INSTRUM spect  
PROBHD 5 mm QNP 1H  
PULPROG zg30  
TD 65536  
SOLVENT CDCl3  
NS 8  
DS 4  
SMH 8278.146 HZ  
FIDRES 0.126314 HZ  
AQ 3.9584243 sec  
RG 45.3  
DM 60.400 usec  
DE 6.00 usec  
TE 300.0 K  
D1 1.00000000 sec

===== CHANNEL f1 =====  
NUC1 1H  
P1 9.50 usec  
PL1 2.00 dB  
SFO1 400.1324710 MHz

F2 - Processing parameters  
SI 32768  
SF 400.1300000 MHz  
WDW EM  
SSB 0  
LB 0.30 HZ  
GB 0  
PC 1.00

1D NMR plot parameters  
CX 20.00 cm  
F1P 10.000 ppm  
F1 4001.30 HZ  
F2P 0.000 ppm  
F2 0.00 HZ  
PPMCM 0.50000 ppm/cm  
HZCM 200.06500 HZ/cm

SN050690

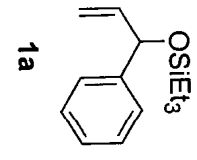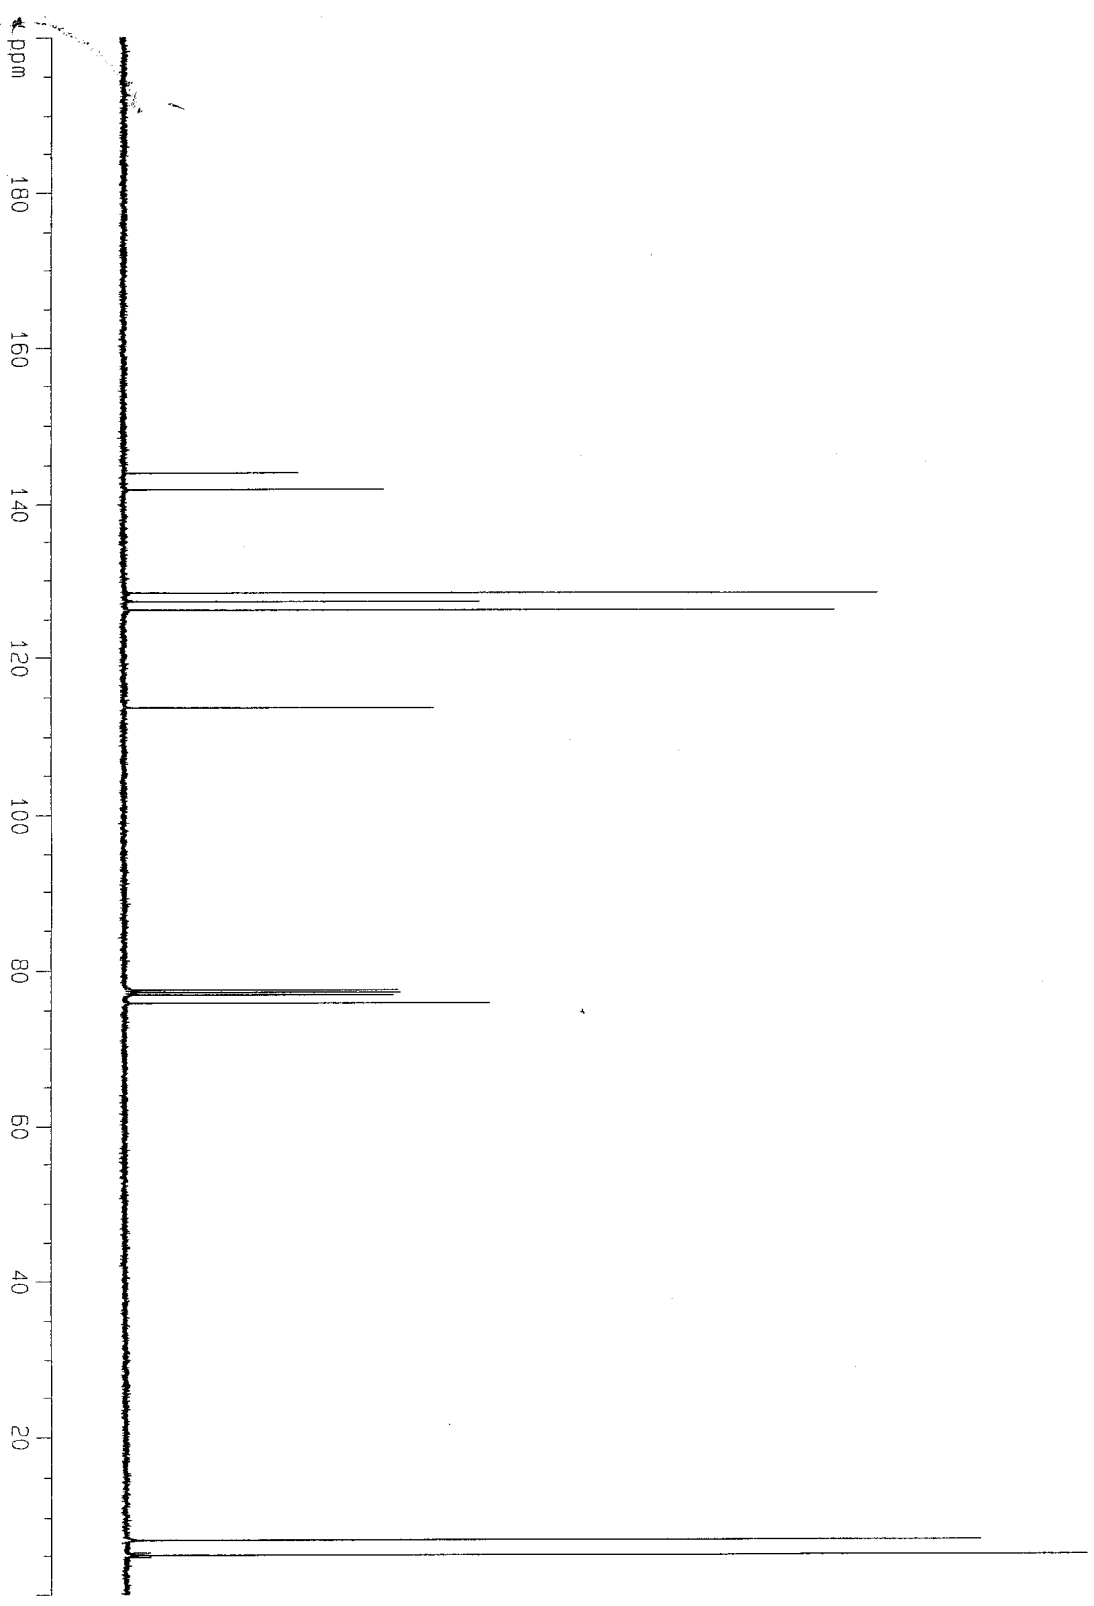

Current Data Parameters  
NAME SN690-C  
EXPNO 1  
PROCNO 1

F2 - Acquisition Parameters  
Date\_ 20050707  
Time 20.02  
INSTRUM spect  
PROBHD 5 mm QNP 1H  
PULPROG zgpg30  
TD 65536  
SOLVENT CDCl3  
NS 874  
DS 4  
SWH 24330.900 Hz  
FIDRES 0.371260 Hz  
AQ 1.3468148 sec  
RG 1024  
DW 20.550 usec  
DE 6.00 usec  
TE 300.0 K  
D1 2.00000000 sec  
d11 0.03000000 sec  
d12 0.00002000 sec

==== CHANNEL f1 =====  
NUC1 13C  
P1 8.50 usec  
PL1 3.00 dB  
SFO1 100.6237959 MHz

==== CHANNEL f2 =====  
CPDPRG2 waltz16  
NUC2 1H  
PCPD2 100.00 usec  
PL2 2.00 dB  
PL12 22.00 dB  
PL13 22.00 dB  
SFO2 400.1315005 MHz

F2 - Processing parameters  
SI 32768  
SF 100.6127533 MHz  
WDW EM  
SSB 0  
LB 1.00 Hz  
GB 0  
PC 1.40

1D NMR Plot Parameters  
CX 20.00 cm  
F1P 200.000 DDM  
F1 20122.55 Hz  
F2P 0.000 DDM  
F2 0.00 Hz  
PPMCM 10.00000 ppm/cm  
HZCM 1006.12756 Hz/cm

SN050714

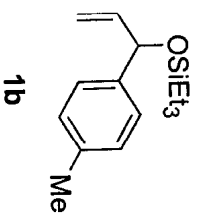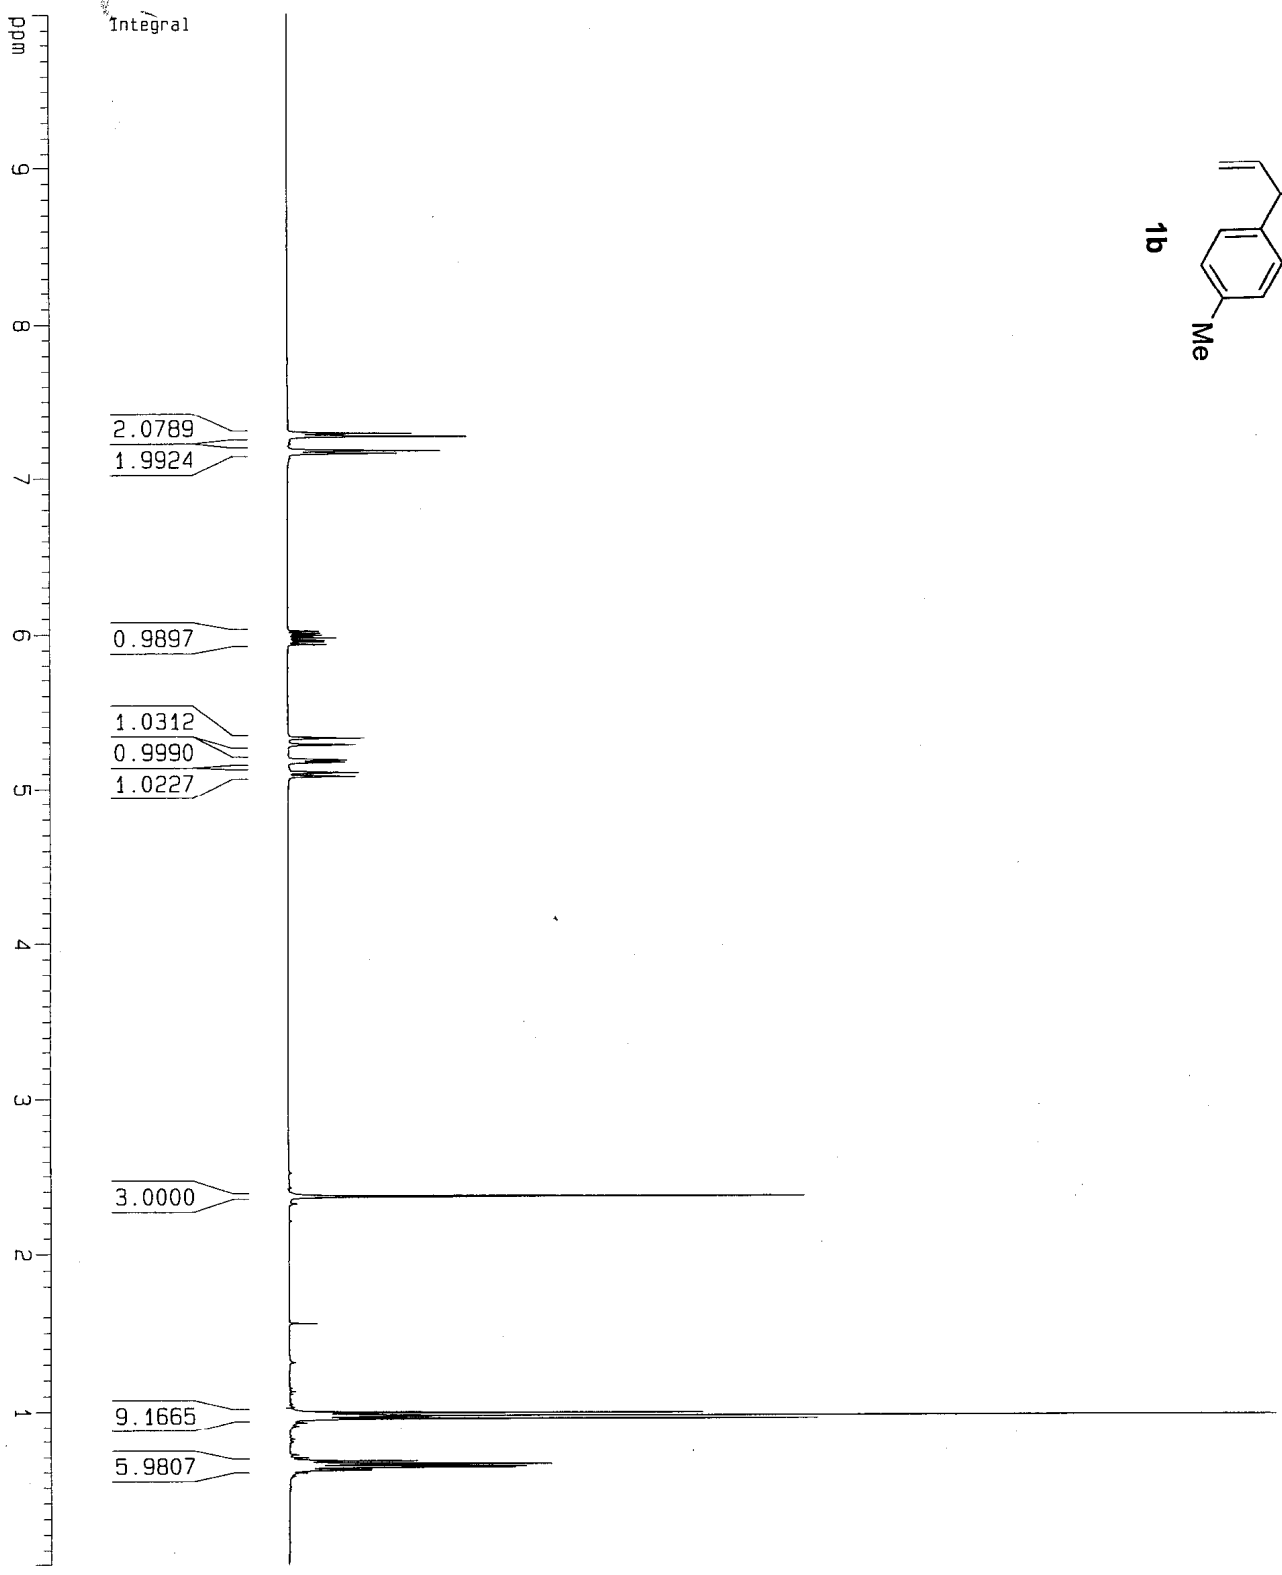

Current Data Parameters  
NAME SN714-H  
EXPNO 1  
PROCNO 1

F2 - Acquisition Parameters  
Date\_ 20050716  
Time 21.05  
INSTRUM spect  
PROBHD 5mm BBO BB-1  
PULPROG zg30  
TD 65536  
SOLVENT CDCl3  
NS 8  
DS 2  
SWH 8278.146 Hz  
FIDRES 0.126314 Hz  
AQ 3.9584243 sec  
RG 35.9  
DW 60.400 usec  
DE 6.00 usec  
TE 300.0 K  
D1 1.00000000 sec

===== CHANNEL f1 =====

NUC1 1H  
P1 7.90 usec  
PL1 0.00 dB  
SF01 400.1324710 MHz

F2 - Processing parameters  
SI 32768  
SF 400.1300051 MHz  
WDW EM  
SSB 0  
LB 0.30 Hz  
GB 0  
PC 1.00

1D NMR plot parameters  
CX 20.00 cm  
F1P 10.000 ppm  
F1 4001.30 Hz  
F2P 0.000 ppm  
F2 0.00 Hz  
PPKCM 0.50000 ppm/cm  
HZCW 200.06500 Hz/cm

SNO50714

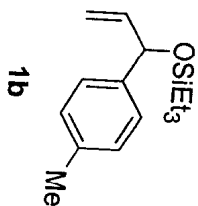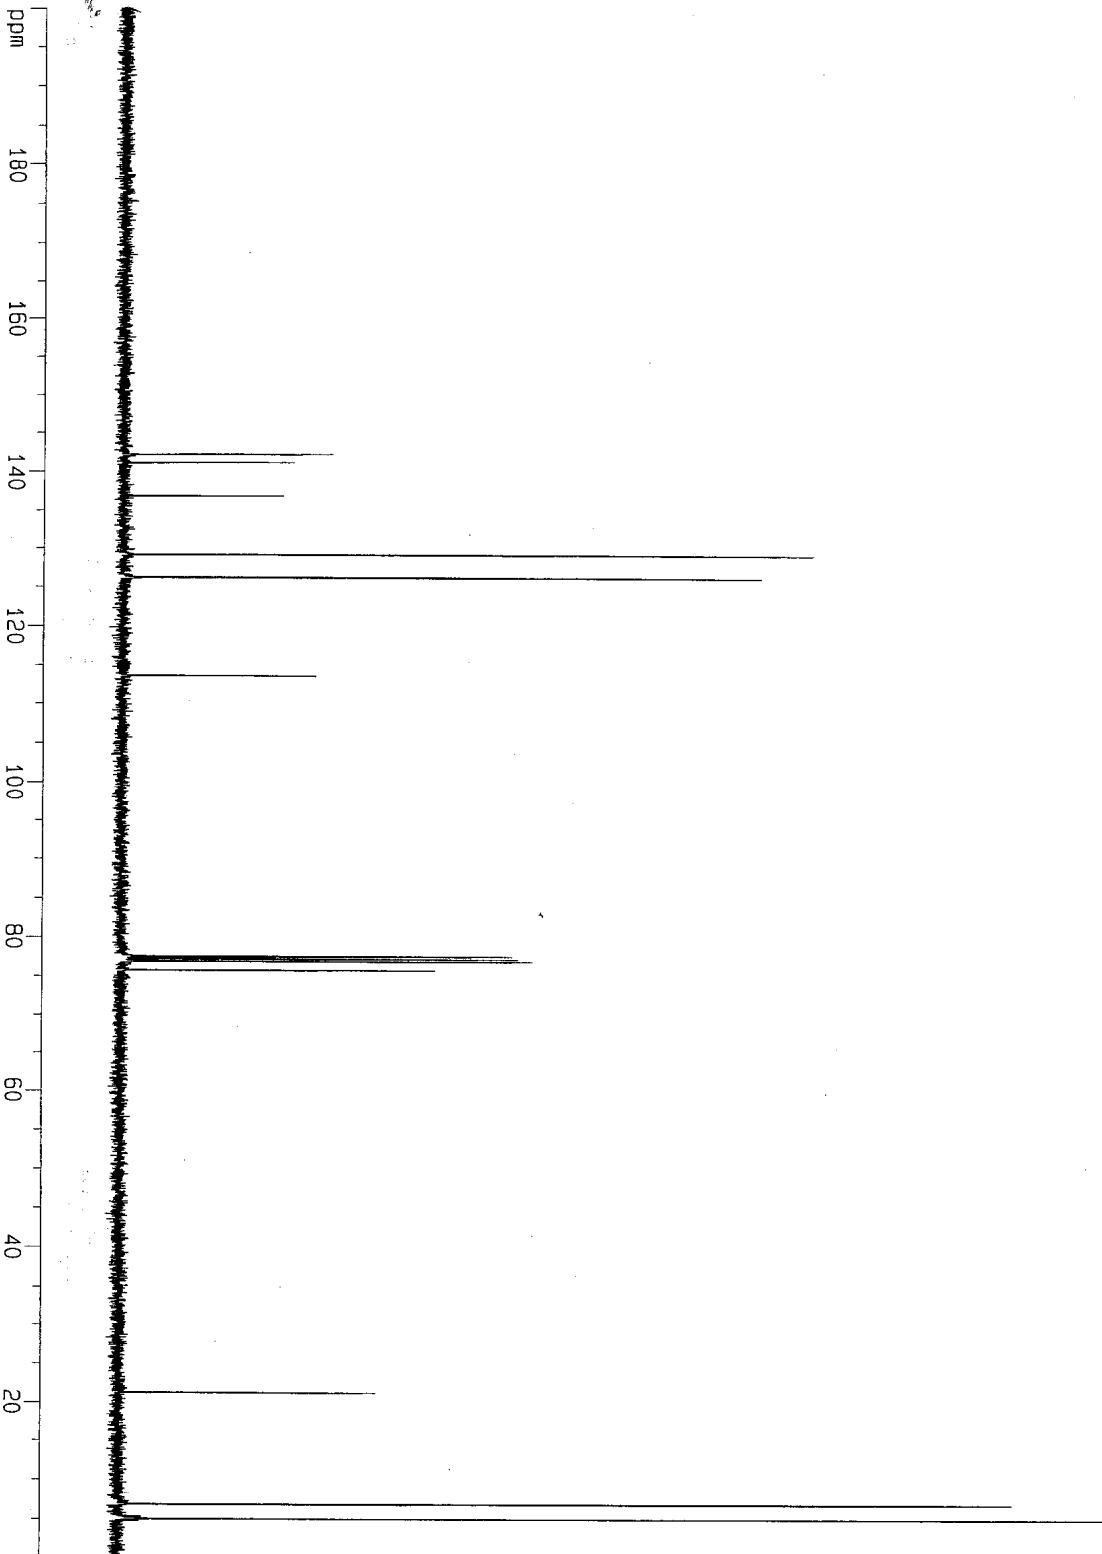

Current Data Parameters  
NAME SN714-C  
EXPNO 1  
PROCNO 1

F2 - Acquisition Parameters  
Date\_ 20050716  
Time 20.58

INSTRUM spect  
PROBHD 5mm BB1 B1-1  
PULPROG zgpg30  
TD 65536  
SOLVENT CDCl3  
NS 109  
DS 4

SWH 25125.629 HZ  
FIDRES 0.383387 HZ  
AQ 1.3042164 sec  
RG 2048  
DW 19.900 usec  
DE 6.00 usec  
TE 300.0 K

D1 2.00000000 sec  
d11 0.03000000 sec  
d12 0.00002000 sec

==== CHANNEL f1 =====  
NUC1 13C  
P1 15.25 usec  
PL1 3.00 dB  
SF01 100.6237959 MHZ

==== CHANNEL f2 =====  
CPDPRG2 waltz16  
NUC2 1H  
PCPD2 107.50 usec  
PL2 0.00 dB

PL13 24.00 dB  
SF02 400.1316005 MHZ

F2 - Processing parameters  
SI 32768  
SF 100.6127492 MHZ  
WDW EM  
SSB 0  
LB 1.00 HZ  
GB 0  
PC 1.40

ID NMR plot parameters  
CX 20.00 cm  
F1P 200.000 ppm  
F1 20122.55 HZ  
F2P 0.000 ppm  
F2 0.00 HZ  
PPMCM 10.00000 ppm/cm  
HZCM 1006.2744 HZ/cm



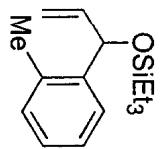

1c

SN050715

Current Data Parameters  
 NAME SN715-H  
 EXPNO 1  
 PROCNO 1

F2 - Acquisition Parameters  
 Date 20050716  
 Time 21.18

INSTRUM spect  
 PROBHD 5mm BB0-BB-1  
 PULPROG zg30  
 TD 65536  
 SOLVENT CDCl3  
 NS 8  
 DS 2

SMH 8278.146 Hz  
 FIDRES 0.126314 Hz  
 AQ 3.9584243 sec  
 RG 50.8

DW 60.400 usec  
 DE 6.00 usec  
 TE 300.0 K  
 D1 1.00000000 sec

===== CHANNEL f1 =====

NUC1 1H  
 P1 7.90 usec  
 PL1 0.00 dB  
 SFO1 400.1324710 MHz

F2 - Processing parameters  
 SI 32768  
 SF 400.130054 MHz  
 MDW EM  
 SSB 0  
 LB 0.30 Hz  
 GB 0  
 PC 1.00

1D NMR plot parameters  
 CX 20.00 cm  
 F1P 10.000 ppm  
 F1 4001.30 Hz  
 F2P 0.000 ppm  
 F2 0.00 Hz  
 PPMCM 0.50000 ppm/cm  
 HZCM 200.06500 Hz/cm

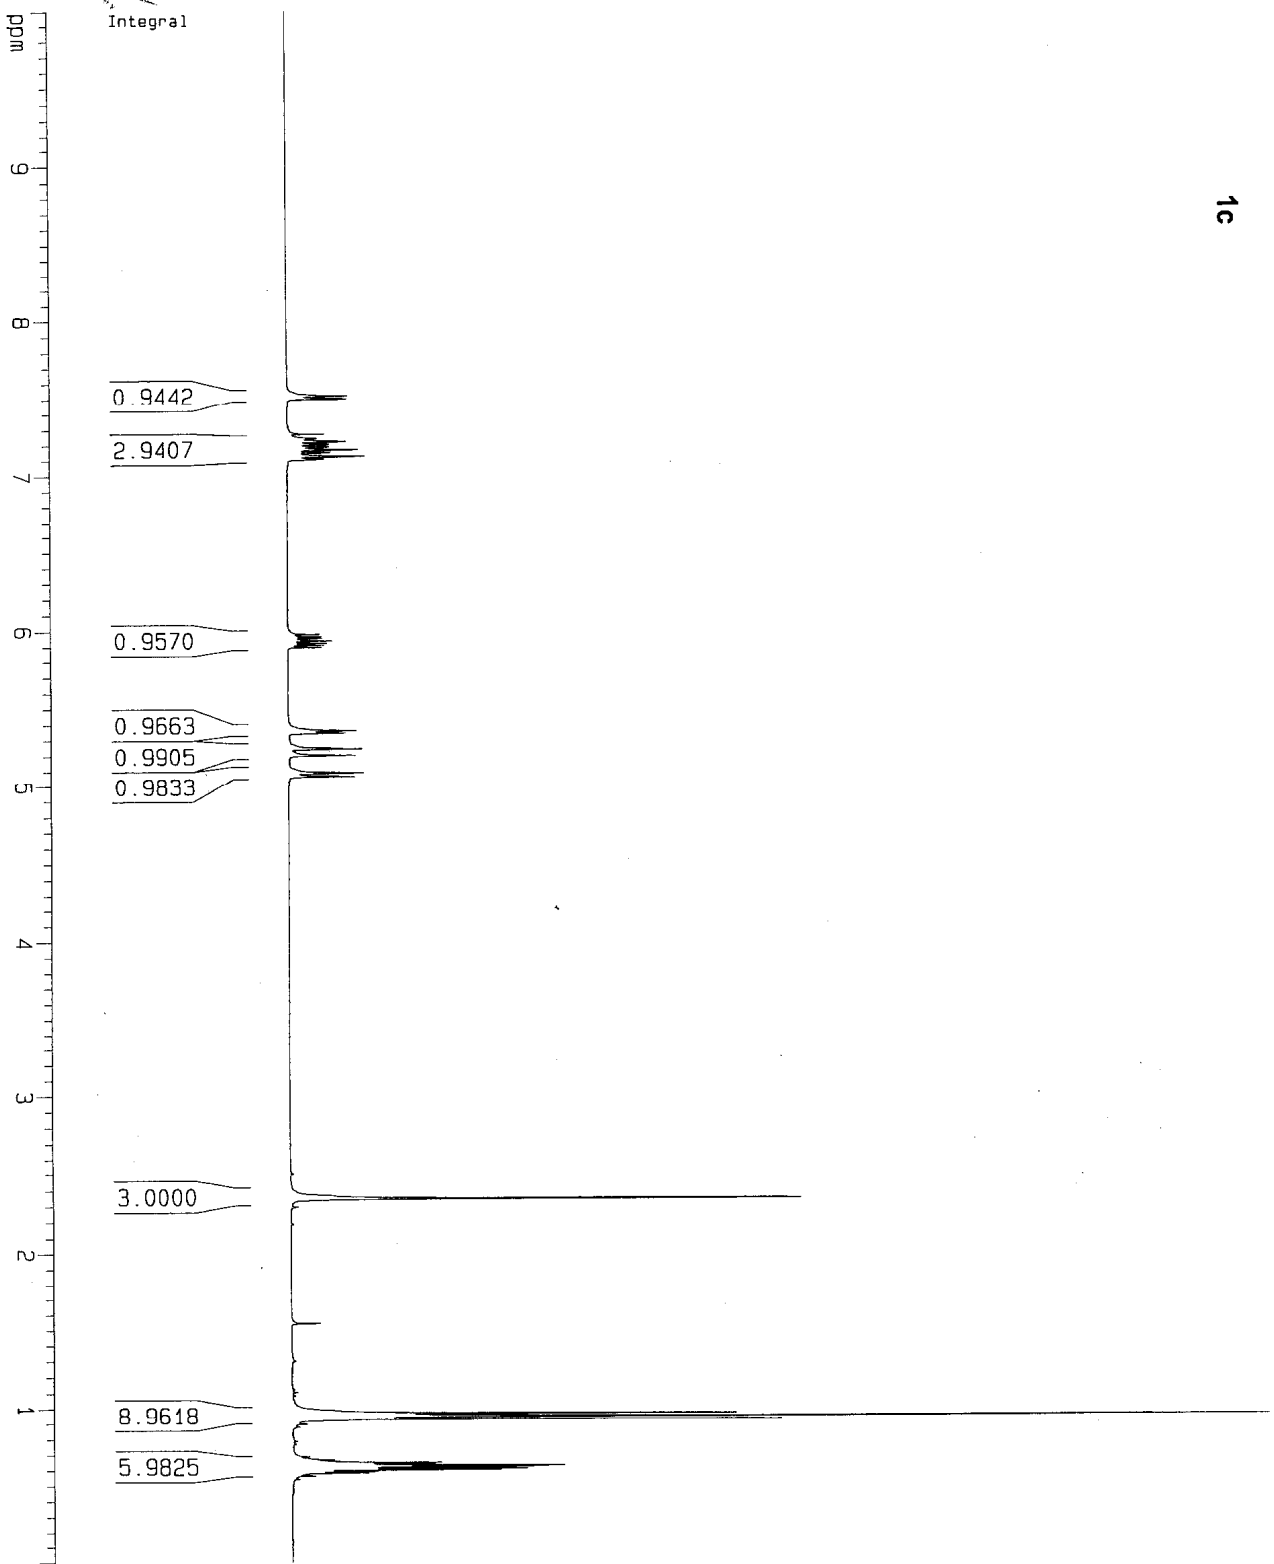

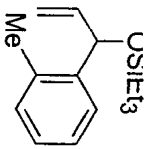

1c

SN050715

Current Data Parameters  
 NAME SN715-C  
 EXPNO 1  
 PROCNO 1

F2 - Acquisition Parameters  
 Date\_ 20050716  
 Time 21.28  
 INSTRUM spect  
 PROBHD 5mm BB0 BB-1  
 PULPROG zgpg30  
 TD 65536  
 SOLVENT CDCl3  
 NS 297  
 DS 4  
 SMH 25125.629 Hz  
 FIDRES 0.383387 Hz  
 AQ 1.3042164 sec  
 RG 1290.2  
 DW 19.900 usec  
 DE 6.00 usec  
 TE 300.0 K  
 D4 2.00000000 sec  
 d11 0.03000000 sec  
 d12 0.00020000 sec

==== CHANNEL f1 =====  
 NUC1 13C  
 P1 15.25 usec  
 PL1 3.00 dB  
 SF01 100.6237959 MHz

==== CHANNEL f2 =====  
 CPDPRG2 waltz16  
 NUC2 1H  
 PCPD2 107.50 usec  
 PL2 0.00 dB  
 PL12 24.00 dB  
 PL13 24.00 dB  
 SF02 400.1316005 MHz

F2 - Processing Parameters  
 SI 32768  
 SF 100.6127476 MHz  
 KDW EM  
 SSB 0  
 LB 1.00 Hz  
 GB 0  
 PC 1.40

1D NMR Plot parameters  
 CX 20.00 cm  
 F1P 200.000 ppm  
 F1 20122.55 Hz  
 F2P 0.000 ppm  
 F2 0.00 Hz  
 PPMCK 10.0000 ppm/cm  
 HZCM 1006.12744 Hz/cm

ppm 180 160 140 120 100 80 60 40 20

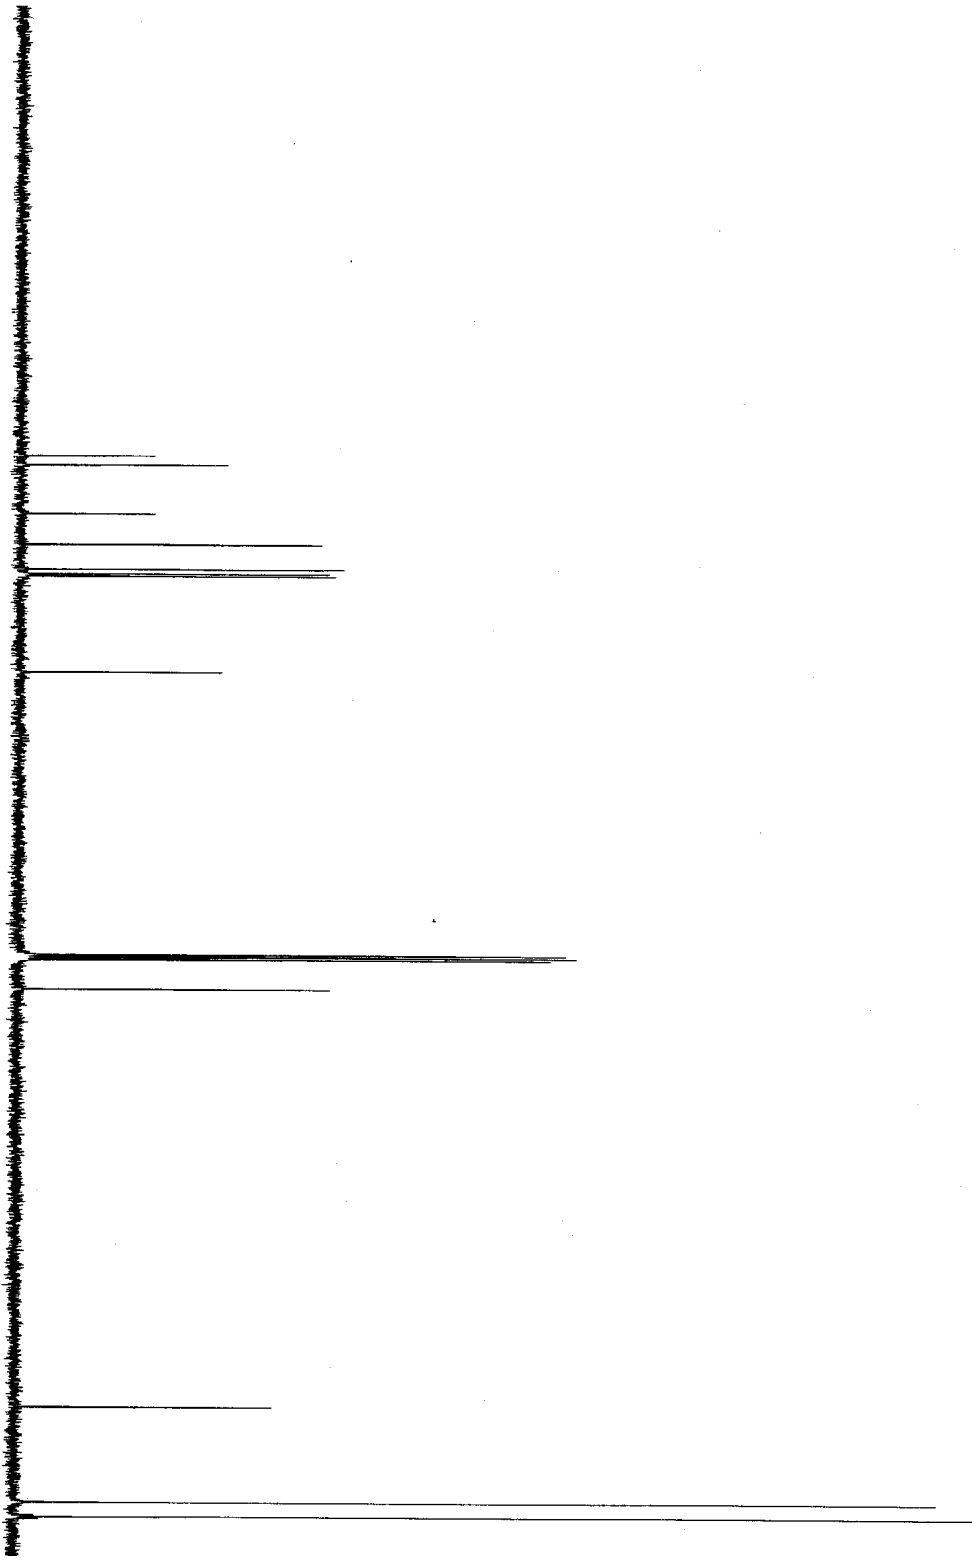

SN050729

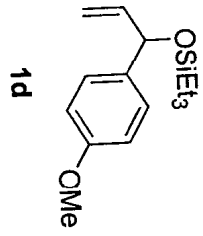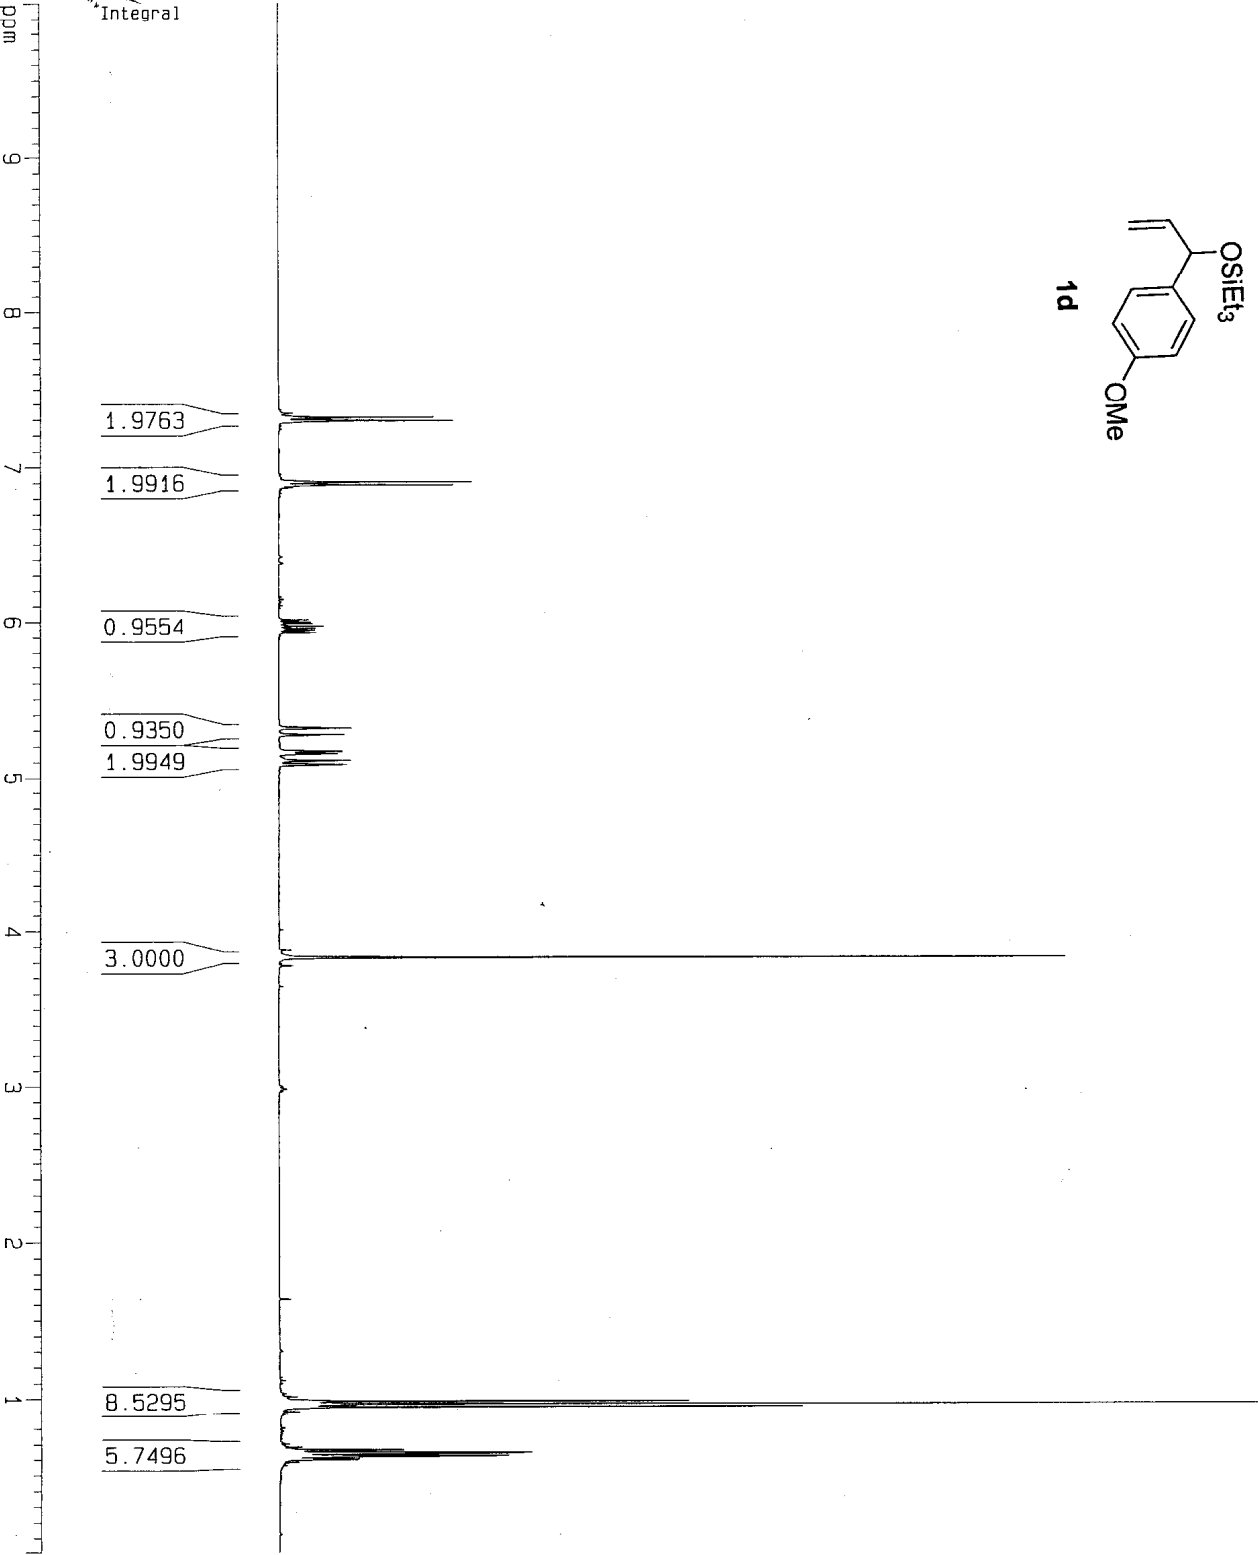

Current Data Parameters  
NAME SN729-H  
EXPNO 1  
PROCNO 1

F2 - Acquisition Parameters

Date\_ 20050724  
Time 19.06  
INSTRUM spect  
PROBHD 5mm BBO BB-1  
PULPROG zg30  
TD 65536  
SOLVENT CDCl3  
NS 8  
DS 2  
SWH 8278.146 Hz  
FIDRES 0.126314 Hz  
AQ 3.9584243 sec  
RG 40.3  
DW 60.400 usec  
DE 5.00 usec  
TE 300.0 K  
D1 1.00000000 sec

===== CHANNEL f1 =====

NUC1 1H  
P1 7.90 usec  
PL1 0.00 dB  
SF01 400.1324710 MHz

F2 - Processing parameters

SI 32768  
SF 400.1300000 MHz  
WDW EM  
SSB 0  
LB 0.30 Hz  
GB 0  
PC 1.00

1D NMR plot parameters

CX 20.00 cm  
F1P 10.000 ppm  
F1 4001.30 Hz  
F2P 0.000 ppm  
F2 0.00 Hz  
PPMCM 0.50000 ppm/cm  
HZCM 200.06500 Hz/cm

SN050729

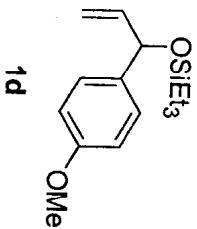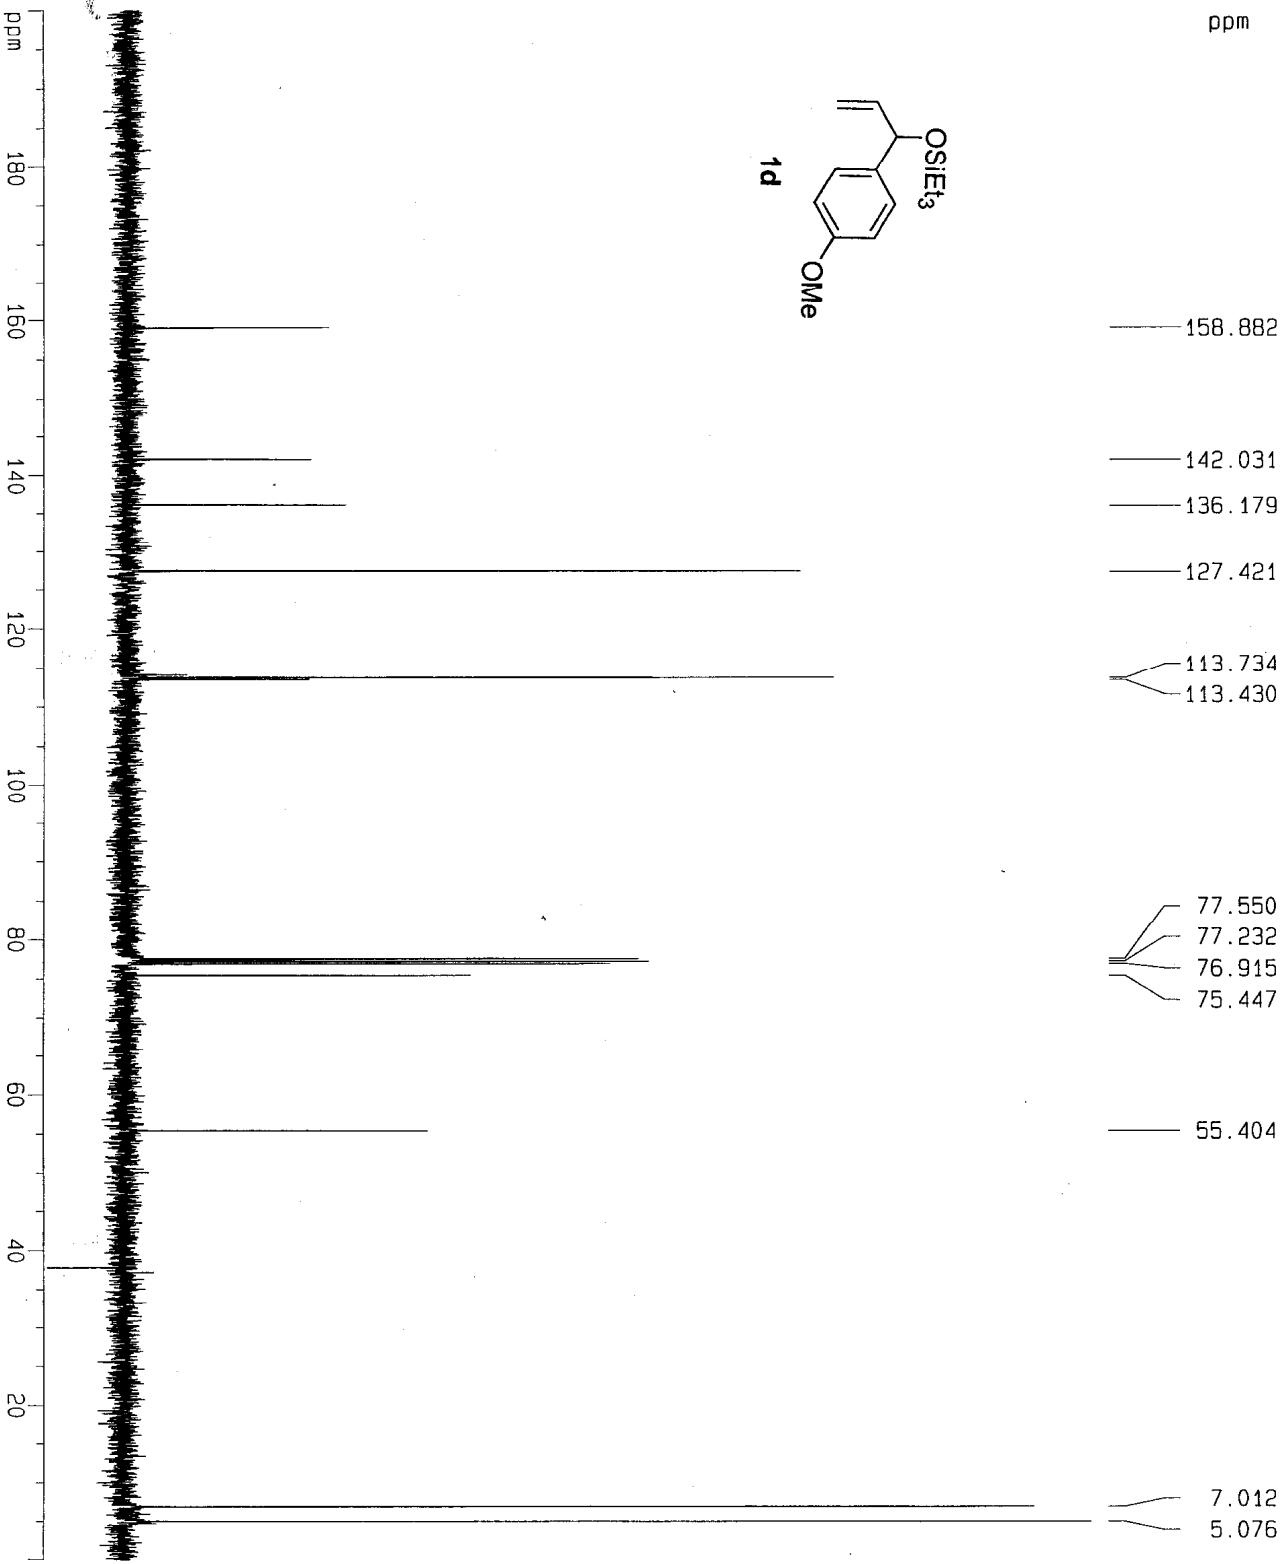

158.882  
 142.031  
 136.179  
 127.421  
 113.734  
 113.430  
 77.550  
 77.232  
 76.915  
 75.447

55.404

7.012  
 5.076

Current Data Parameters

NAME SV729-C  
 EXPNO 1  
 PROCNO 1

F2 - Acquisition Parameters

Date\_ 20050724  
 Time 19.26  
 INSTRUM spect  
 PROBHD 5mm BBO BB-1  
 PULPROG zgpg30  
 TD 65536  
 SOLVENT CDCl3  
 NS 28  
 DS 4  
 SWH 25125.629 Hz  
 FIDRES 0.393387 Hz  
 AQ 1.3642164 sec  
 RG 2048  
 DE 19.900 usec  
 TE 300.0 K  
 D1 2.00000000 sec  
 d11 0.03000000 sec  
 d12 0.00020000 sec

CHANNEL f1

NUC1 13C  
 P1 15.25 usec  
 PL1 3.00 dB  
 SFO1 100.6237959 MHz

CHANNEL f2

CPDPRG2 waltz16  
 NUC2 1H  
 PCPD2 107.50 usec  
 PL2 0.00 dB  
 PL12 24.00 dB  
 PL13 24.00 dB  
 SFO2 400.1316005 MHz

F2 - Processing Parameters

SI 32768  
 SF 100.6127515 MHz  
 WDW EM  
 SSB 0  
 LB 1.00 Hz  
 GB 0  
 PC 1.40

1D NMR plot parameters

CX 20.00 cm  
 F1P 200.000 ppm  
 F1 20122.55 Hz  
 F2P 0.000 ppm  
 F2 0.00 Hz  
 PPMCM 10.00000 ppm/cm  
 HZCM 1006.12756 Hz/cm

SN050723

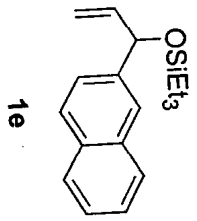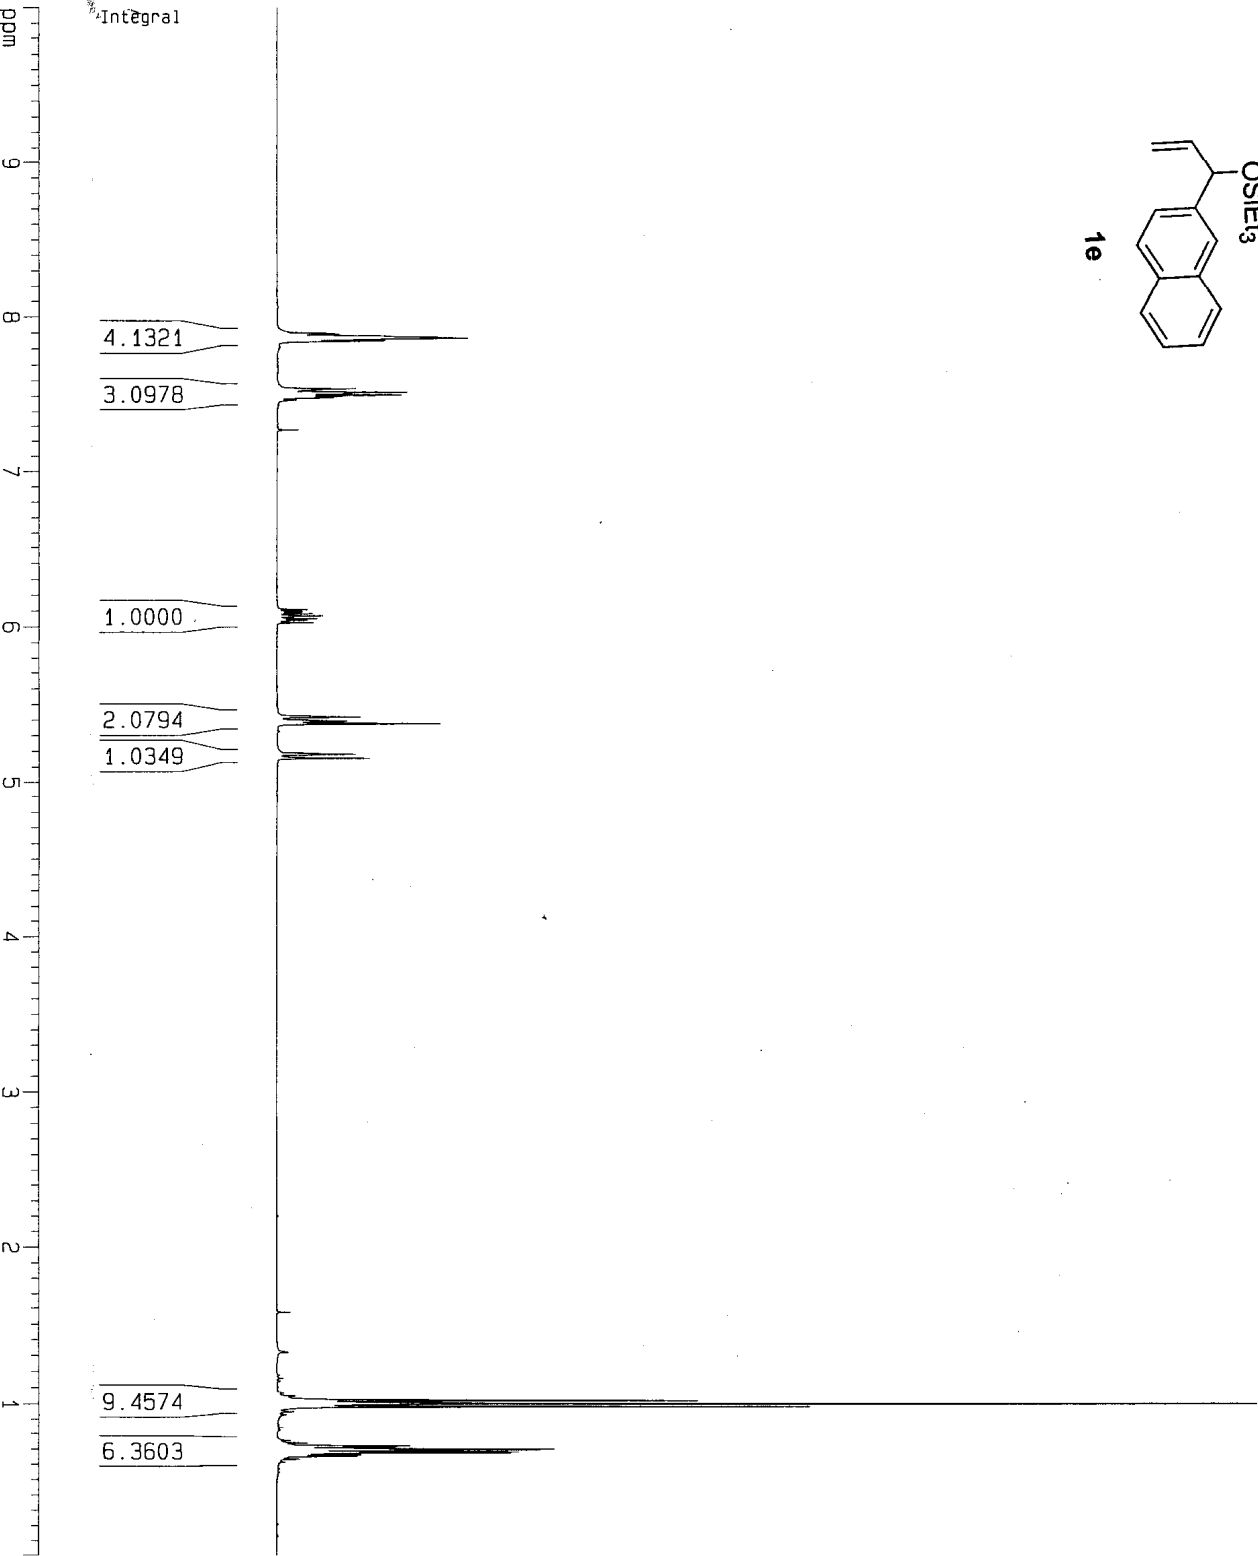

Current Data Parameters  
NAME SN723-H  
EXPNO 1  
PROCNO 1

F2 - Acquisition Parameters  
Date\_ 20050721  
Time 22.05

INSTRUM spect  
PROBHD 5mm BBO BB-1  
PULPROG zg30

TD 65536  
SOLVENT CDCl3  
NS 8  
DS 2

SWH 8278.146 HZ  
FIDRES 0.126314 HZ  
AQ 3.9584243 sec

RG 40.3  
DW 60.400 usec  
DE 6.00 usec

TE 300.0 K  
D1 1.00000000 sec

===== CHANNEL f1 =====  
NUC1 1H  
P1 7.90 usec  
PL1 0.00 dB

SFO1 400.1324710 MHZ

F2 - Processing parameters  
SI 32768  
SF 400.1300056 MHZ

WDW EM  
SSB 0  
LB 0.30 HZ  
GB 0  
PC 1.00

1D NMR plot parameters  
CX 20.00 cm  
F1p 10.000 ppm

F1 4001.30 HZ  
F2p 0.000 ppm  
F2 0.00 HZ

PPMCM 0.50000 ppm/cm  
HZCM 200.06500 HZ/cm

169

SN050723

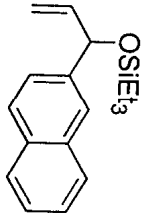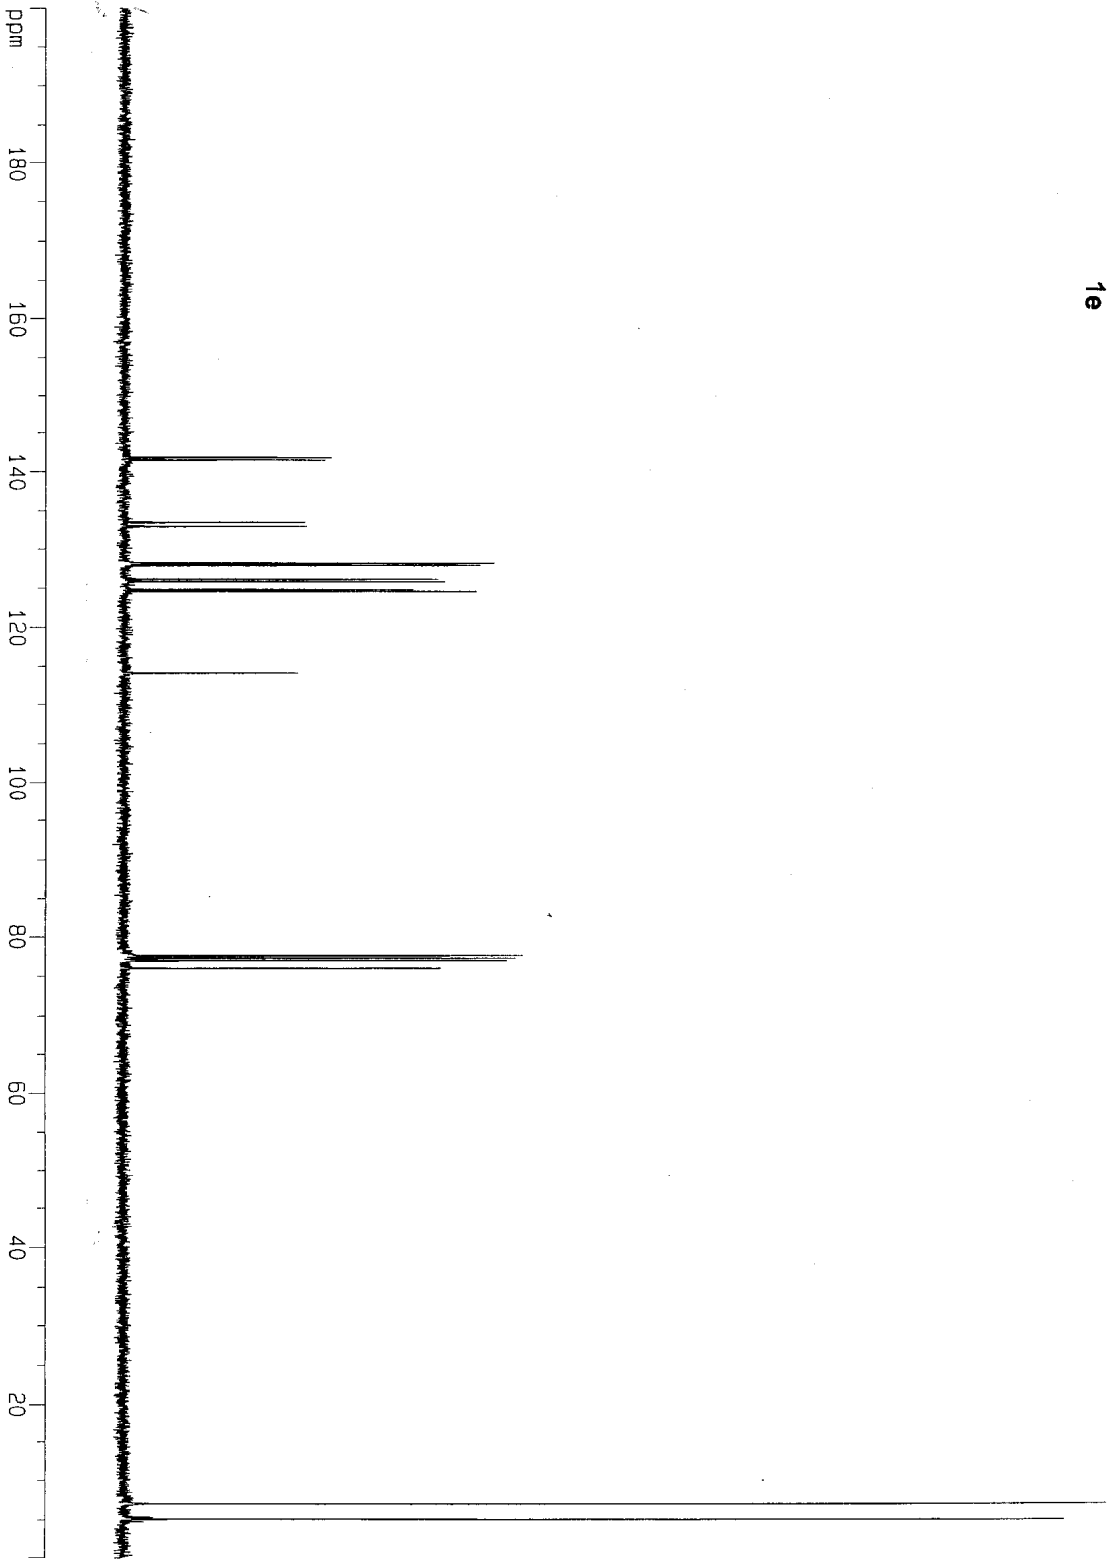

Current Data Parameters  
NAME SN723-C  
EXPNO 1  
PROCNO 1

F2 - Acquisition Parameters  
Date\_ 20050721  
Time 22.21

INSTRUM spect  
PROBHD 5mm BBO BB-1  
PULPROG zgpg30  
TD 65536  
SOLVENT DMS-D6  
NS 137  
DS 4

SMH 251.25629 Hz  
FIDRES 0.383387 Hz  
AQ 1.3042164 sec  
RG 4096

DW 19.900 usec  
DE 6.00 usec  
TE 300.0 K  
D1 2.00000000 sec  
d11 0.03000000 sec  
d12 0.00002000 sec

==== CHANNEL f1 =====  
NUC1 13C  
P1 15.25 usec  
PL1 3.00 dB  
SF01 100.6237959 MHz

==== CHANNEL f2 =====  
CPDPRG2 waltz16  
NUC2 1H  
PCPDZ 107.50 usec  
PL2 0.00 dB  
PL12 24.00 dB  
PL13 24.00 dB  
SF02 400.1316005 MHz

F2 - Processing parameters  
SI 32768  
SF 100.6127538 MHz  
WDW EM  
SSB 0  
LB 1.00 Hz  
GB 0  
PC 1.40

1D NMR plot parameters  
CX 20.00 cm  
F1P 200.000 ppm  
F1 20122.55 Hz  
F2P 0.000 ppm  
F2 0.00 Hz  
PPMCM 10.00000 ppm/cm  
HZCM 1006.12756 Hz/cm

SN050740

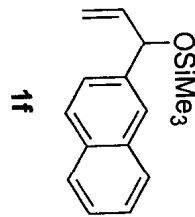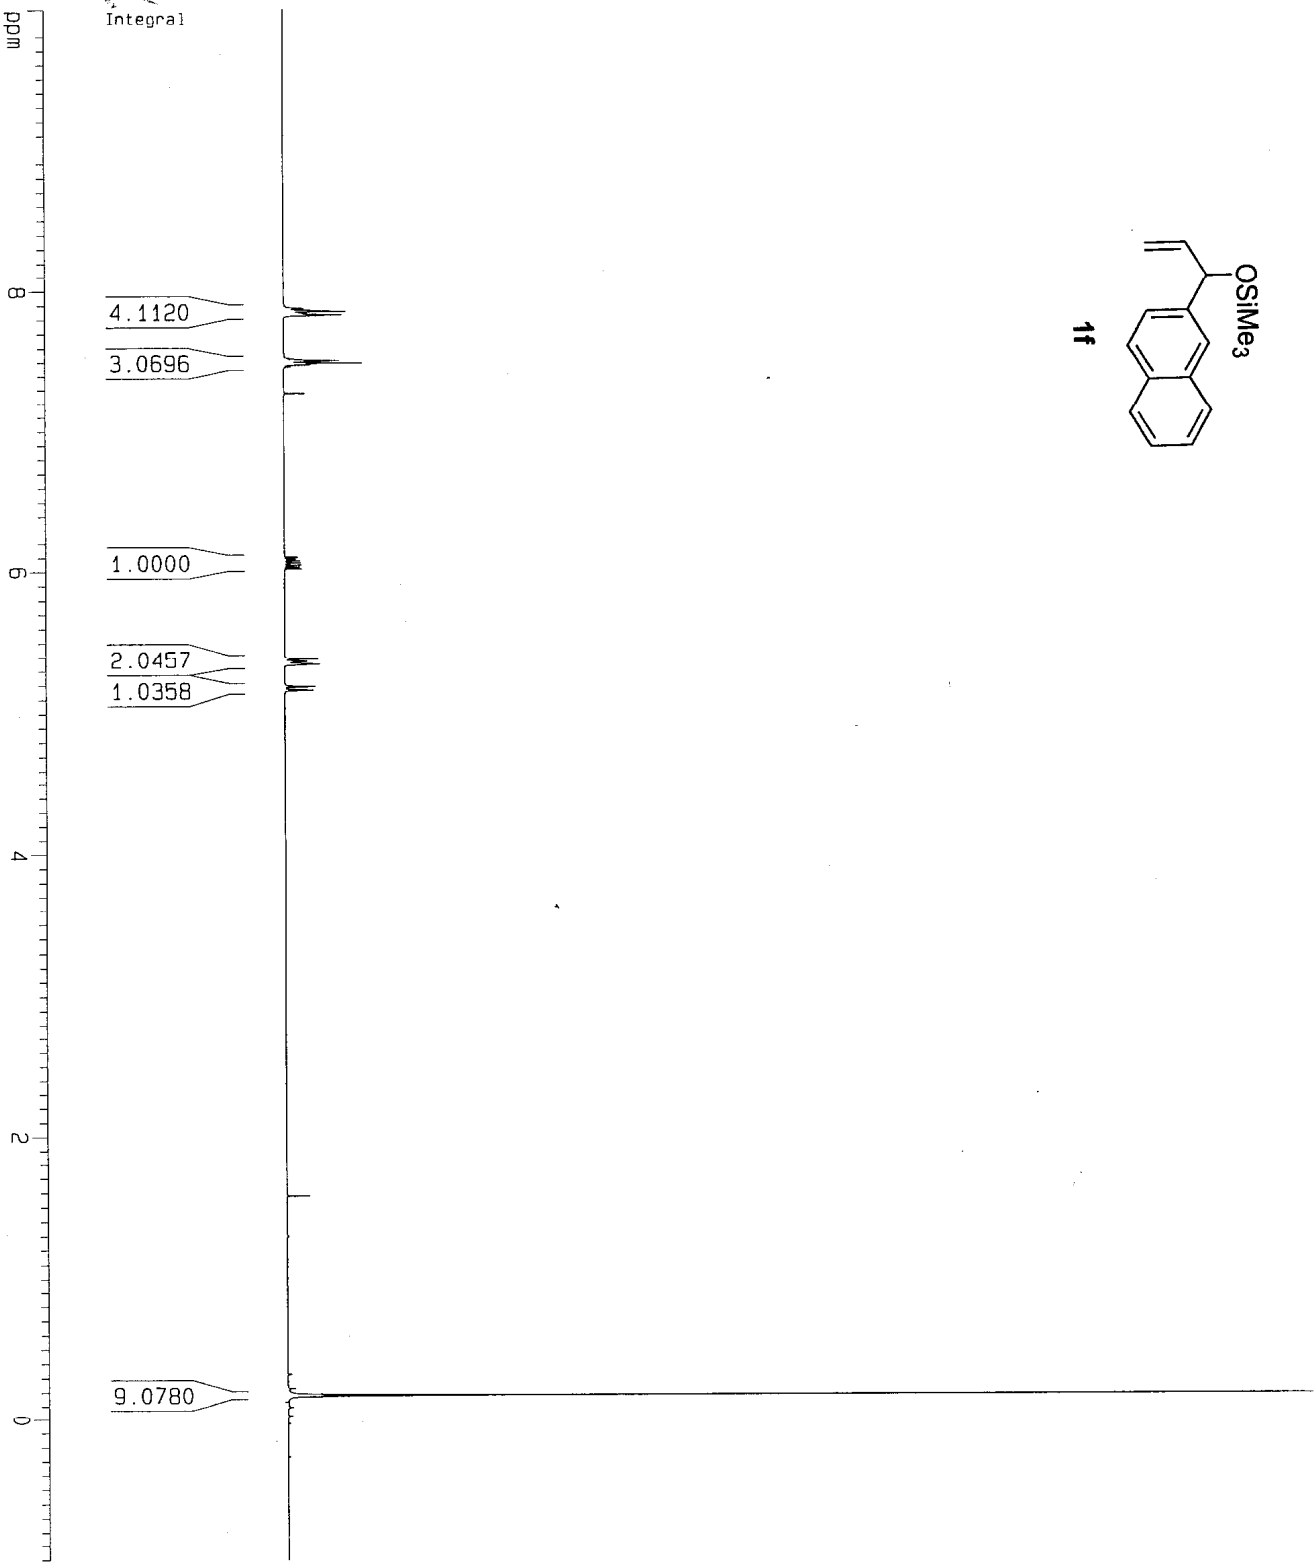

Current Data Parameters  
NAME SN740-H  
EXPNO 1  
PROCNO 1

F2 - Acquisition Parameters

Date 20050729  
Time 22.03  
INSTRUM spect  
PROBHD 5mm 8B0 BB-1  
PULPROG zg30  
TD 65536  
SOLVENT CDCl3  
NS 4  
DS 2  
SMH 8278.146 Hz  
FIDRES 0.126314 Hz  
AQ 3.9584243 sec  
RG 71.8  
DM 60.400 usec  
DE 6.00 usec  
TE 300.0 K  
D1 1.00000000 sec

===== CHANNEL f1 =====

NUC1 1H  
P1 7.90 usec  
PL1 0.00 dB  
SFO1 400.1324710 MHz

F2 - Processing parameters

SI 32768  
SF 400.1300059 MHz  
MDW EM  
SSB 0  
LB 0.30 Hz  
GB 0  
PC 1.00

1D NMR plot parameters

CX 20.00 cm  
F1P 10.000 ppm  
F1 4001.30 Hz  
F2P -1.000 ppm  
F2 -400.13 Hz  
PRMCM 0.55000 ppm/cm  
HZCM 220.07150 Hz/cm

SN050740

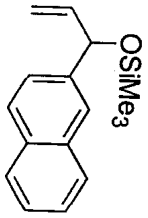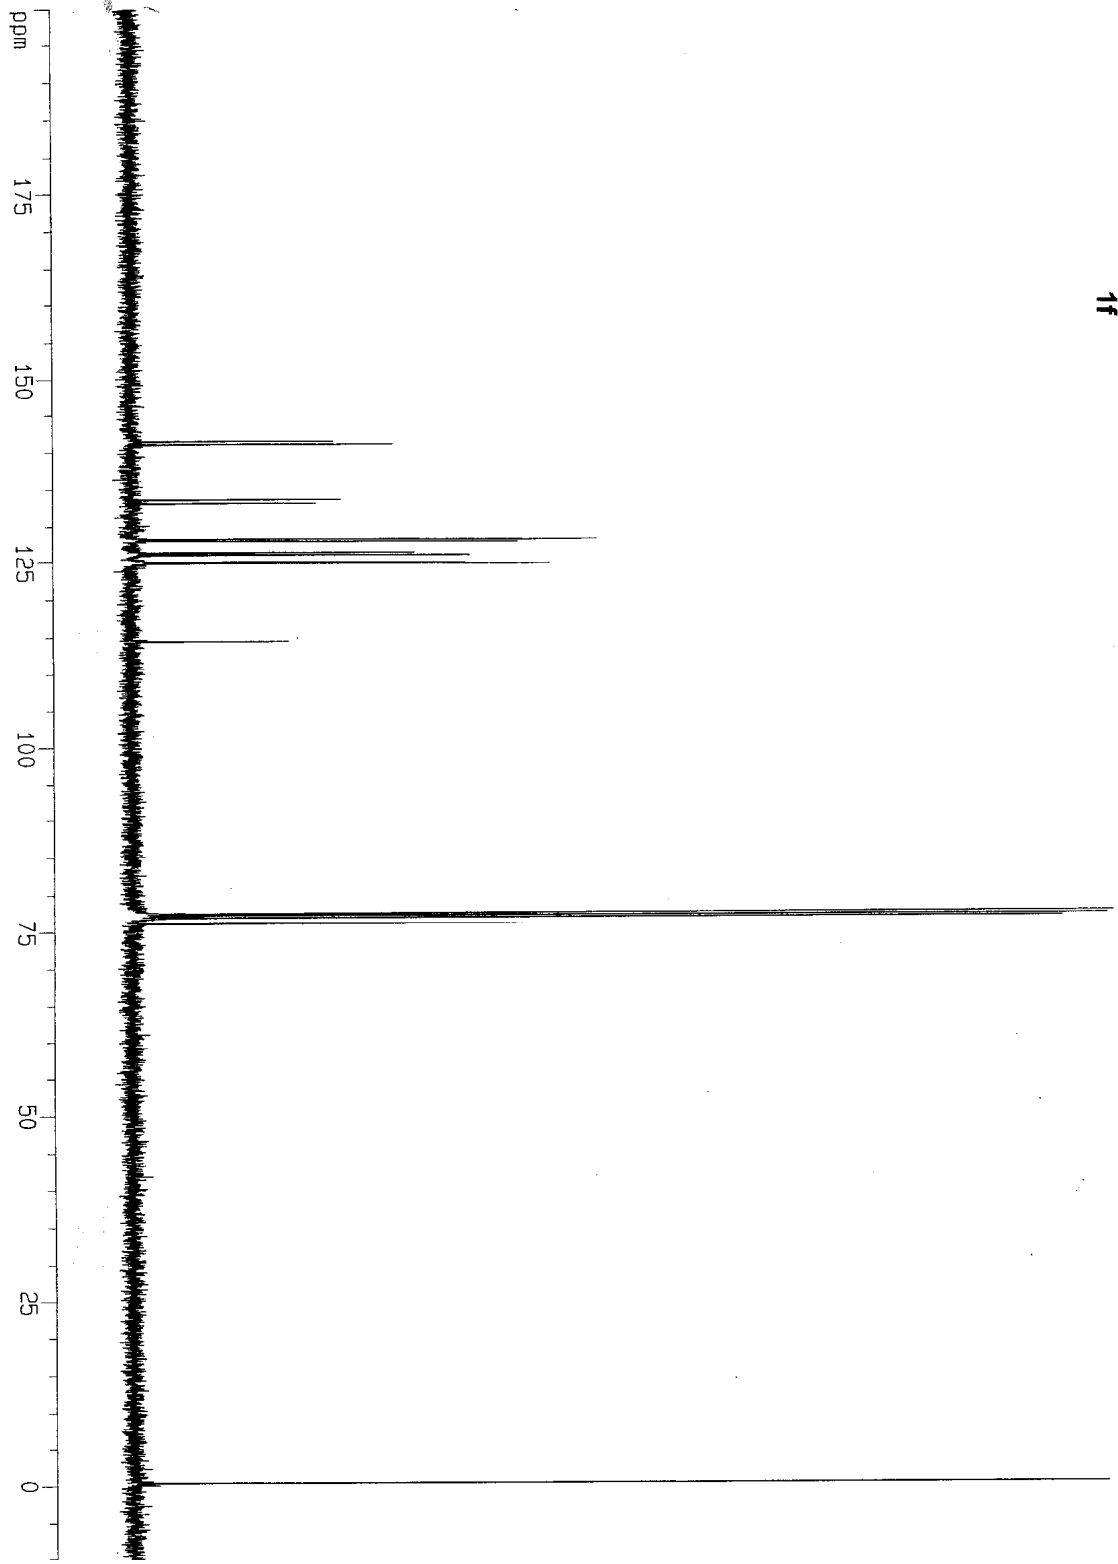

Current Data Parameters  
NAME SN740-C  
EXPNO 1  
PROCNO 1

F2 - Acquisition Parameters  
Date\_ 20050729  
Time 22.05

INSTRUM spect  
PROBHD 5mm BBO BB-1  
PULPROG zgpg30  
TD 65536  
SOLVENT DMS-D<sub>6</sub>

NS 201  
DS 4  
SWH 25125.629 Hz  
FIDRES 0.33387 Hz  
AQ 1.3042164 sec

RG 16384  
DM 19.900 usec  
DE 6.00 usec  
TE 300.0 K

D1 2.00000000 sec  
d11 0.03000000 sec  
d12 0.00002000 sec

===== CHANNEL f1 =====  
NUC1 13C  
P1 15.25 usec  
PL1 3.00 dB  
SF01 100.6237959 MHz

===== CHANNEL f2 =====  
CPDPRG2 waltz16  
NUC2 1H  
PCPD2 107.50 usec  
PL2 0.00 dB  
PL12 24.00 dB  
PL13 24.00 dB  
SF02 400.1316005 MHz

F2 - Processing parameters  
SI 32768  
SF 100.6127522 MHz  
WDW EM  
SSB 0  
LB 1.00 Hz  
GB 0  
PC 1.40

10 NMR plot parameters  
CX 20.00 cm  
F1P 200.000 ppm  
F1 20132.55 Hz  
F2P -10.000 ppm  
F2 -1006.13 Hz  
PPMCM 10.50000 ppm/cm  
HZCM 1056.43396 Hz/cm



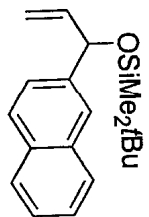

SN050737

Current Data Parameters  
 NAME SN737-H  
 EXPNO 1  
 PROCNO 1

F2 - Acquisition Parameters  
 Date\_ 20050727  
 Time 22.18  
 INSTRUM spect  
 PROBD 5mm BBO BB-1  
 PULPROG zg30  
 TD 65536  
 SOLVENT CDCl<sub>3</sub>  
 NS 4  
 DS 2  
 SWH 8278.146 HZ  
 FIDRES 0.126314 HZ  
 AQ 3.9584243 sec  
 RG 50.8  
 DW 60.400 usec  
 DE 6.00 usec  
 TE 300.0 K  
 D1 1.00000000 sec

===== CHANNEL f1 =====  
 NUC1 1H  
 P1 7.90 usec  
 PL1 0.00 dB  
 SF01 400.1324710 MHZ

F2 - Processing parameters  
 SI 32768  
 SF 400.1300054 MHZ  
 MDW EM  
 SSB 0  
 LB 0.30 HZ  
 GB 0  
 PC 1.00

1D NMR plot parameters  
 CX 20.00 cm  
 F1P 10.000 ppm  
 F1 4001.30 HZ  
 F2P 0.000 ppm  
 F2 0.00 HZ  
 PPMCM 0.50000 ppm/cm  
 HZCM 200.06500 HZ/cm

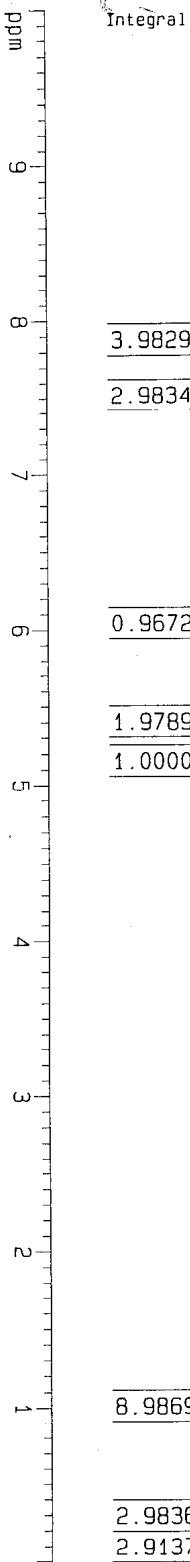

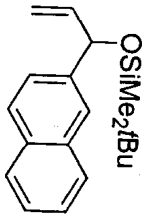

SN050737

Current Data Parameters  
 NAME SN737-C  
 EXPNO 1  
 PROCNO 1

F2 - Acquisition Parameters  
 Date\_ 20050727  
 Time 22.25

INSTRUM spect  
 PROBH0 5mm BBO BB-1  
 PULPROG zgpg30  
 TD 65536  
 SOLVENT COC13  
 NS 151  
 DS 4

SMH 25125.629 HZ  
 FIDRES 0.383387 HZ  
 AQ 1.3042164 sec  
 RG 3251

DW 19.900 usec  
 DE 6.00 usec  
 TE 300.0 K

D1 2.00000000 sec  
 d11 0.03000000 sec  
 d12 0.00002000 sec

==== CHANNEL f1 =====  
 NUC1 13C  
 P1 15.25 usec  
 PL1 3.00 dB  
 SFO1 100.6237959 MHz

==== CHANNEL f2 =====  
 CPDPRG2 waltz16  
 NUC2 1H  
 PCPD2 107.50 usec  
 PL2 0.00 dB  
 PL12 24.00 dB  
 PL13 24.00 dB  
 SFO2 400.1316005 MHz

F2 - Processing parameters  
 SI 32768  
 SF 100.6127530 MHz  
 WDW EM  
 SSB 0  
 LB 1.00 HZ  
 GB 0  
 PC 1.40

1D NMR plot parameters  
 CX 20.00 cm  
 F1P 200.000 ppm  
 F1 20122.55 HZ  
 F2P -10.000 ppm  
 F2 -1006.13 HZ  
 PPMCM 10.50000 ppm/cm  
 HZCM 1056.43396 HZ/cm

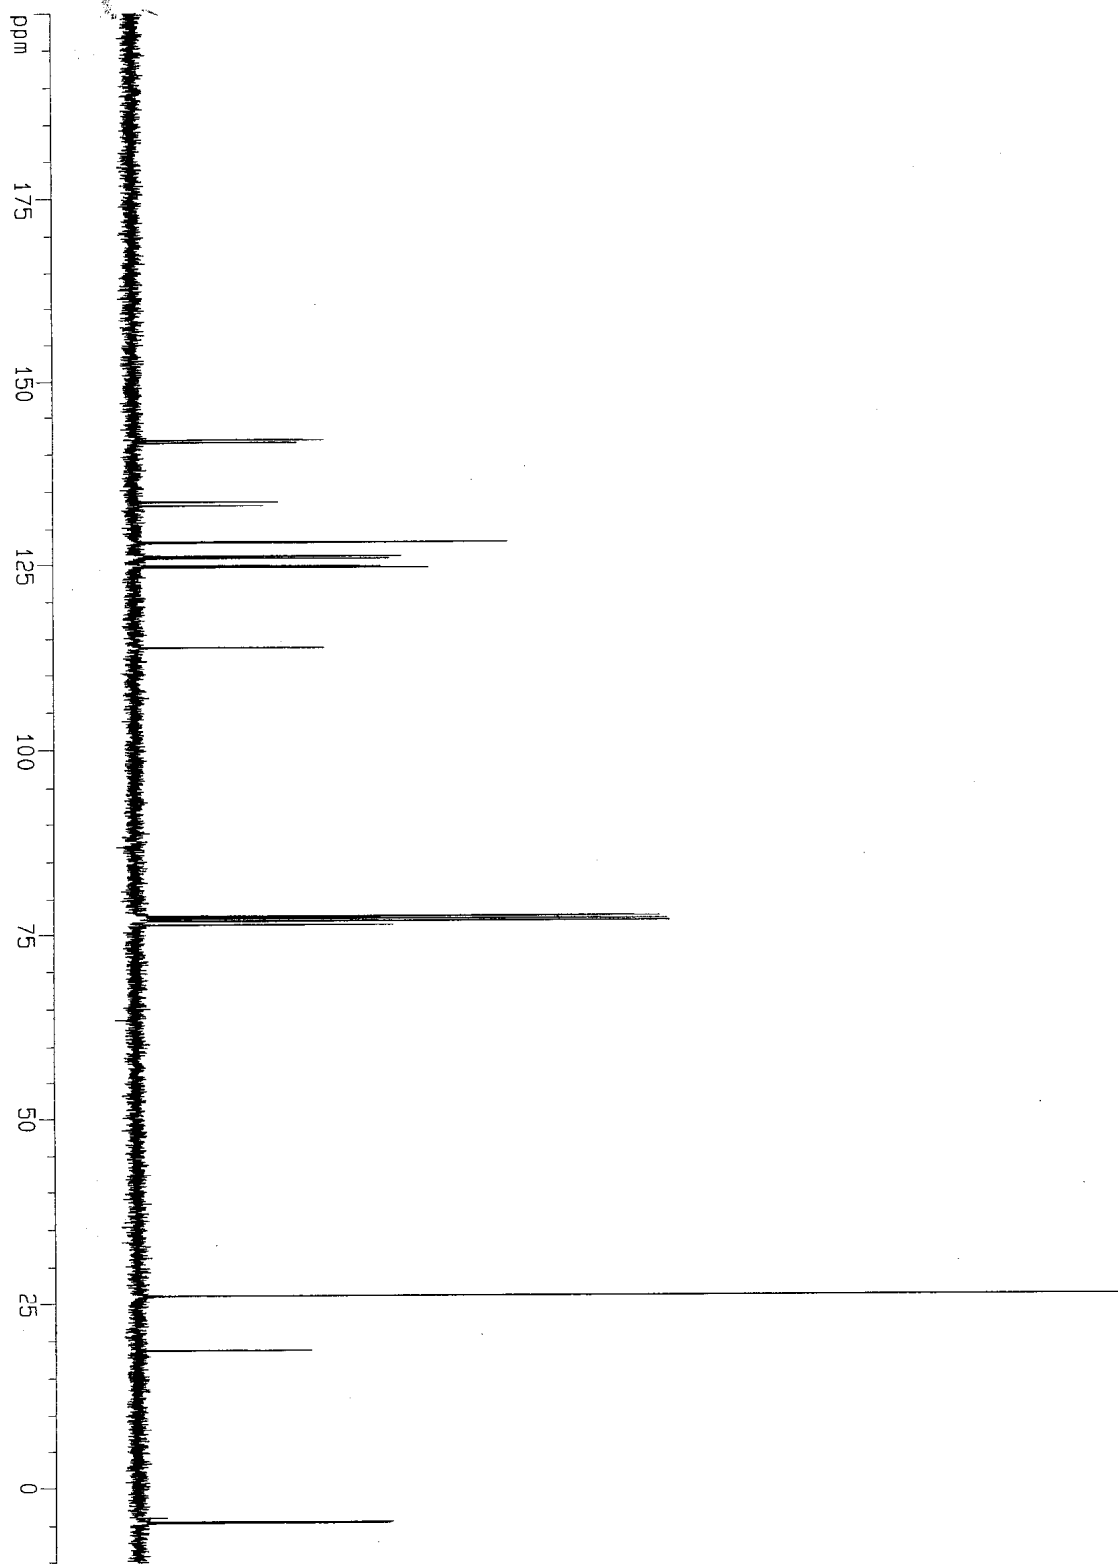

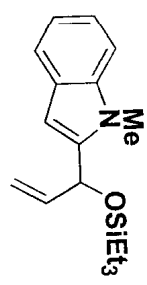

SN061116 mixture

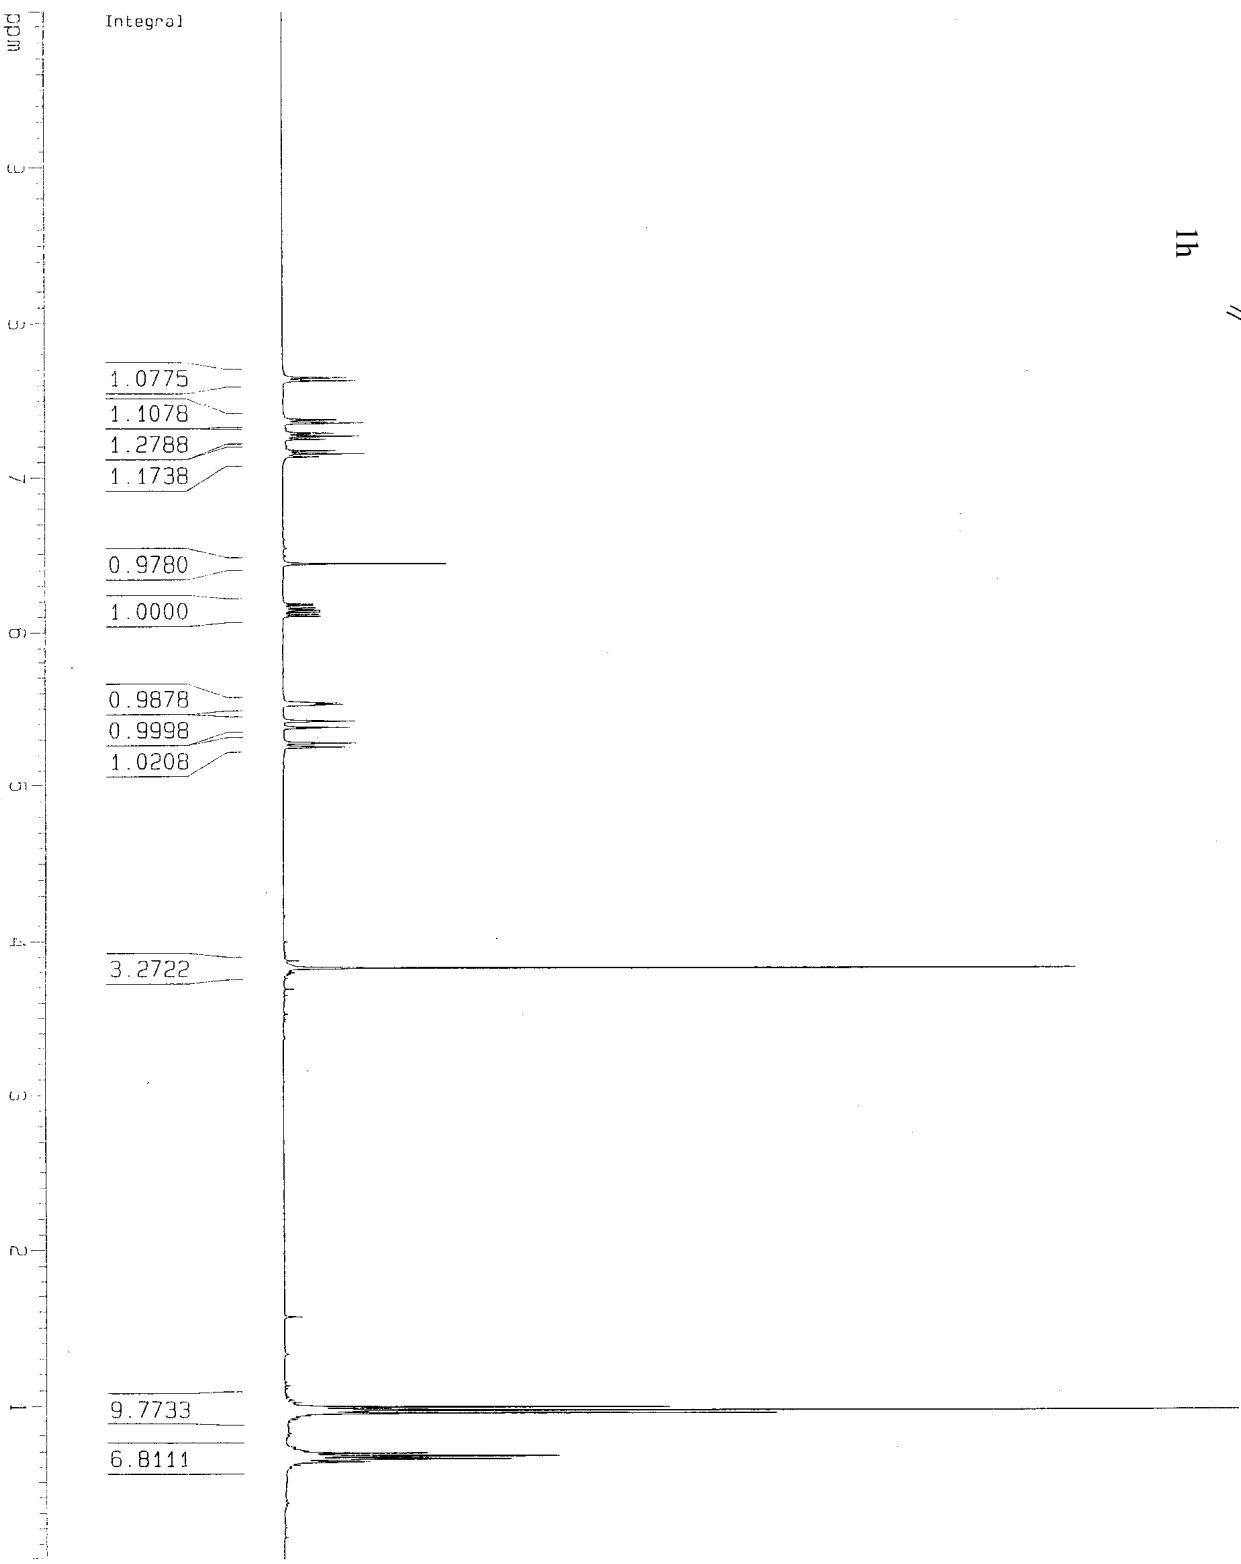

Current Data Parameters  
 NAME SN1116-H3  
 EXPNO 1  
 PROCNO 1

F2 - Acquisition Parameters  
 Date\_ 20060331  
 Time 20.18  
 INSTRUM spect  
 PROBD 5mm BBO BB-1  
 PULPROG zg30  
 TD 65536  
 SOLVENT CDCl3  
 NS 4  
 DS 2  
 SMH 8278.146 Hz  
 FIDRES 0.126314 Hz  
 AQ 3.9584243 sec  
 RG 128  
 DW 60.400 usec  
 DE 6.00 usec  
 TE 300.0 K  
 D1 1.00000000 sec

===== CHANNEL f1 =====  
 NUCL 1H  
 P1 7.90 usec  
 PL1 0.00 dB  
 SF01 400 1324710 MHz

F2 - Processing parameters  
 SI 32768  
 SF 400 1300000 MHz  
 WDW EM  
 SSB 0  
 LB 0.30 Hz  
 GB 0  
 PC 1.00

1D NMR plot parameters  
 CX 20.00 cm  
 F1P 10.000 ppm  
 F1 4001.30 Hz  
 F2P 0.000 ppm  
 F2 0.00 Hz  
 PPKCM 0.50000 ppm/cm  
 HZCM 200.06500 Hz/cm

SN061116 crude

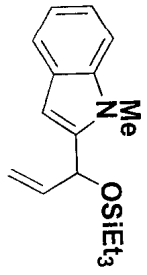

Current Data Parameters  
NAME SN1116-C  
EXPNO 1  
PROCNO 1

F2 - Acquisition Parameters  
Date\_ 20060331  
Time 19.32

INSTRUM spect  
PROBHD 5mm BBO BB-1  
PULPROG zgpg30  
TD 65536  
SOLVENT CDCl<sub>3</sub>  
NS 512  
DS 4

SMH 25129.629 Hz  
FIDRES 0.383387 Hz  
AQ 1.3042164 sec  
RG 2048

DW 19.900 usec  
DE 6.00 usec  
TE 300.0 K

D1 2.00000000 sec  
d11 0.03000000 sec  
d12 0.00020000 sec

===== CHANNEL f1 =====  
NUC1 13C

P1 15.25 usec  
PL1 3.00 dB  
SF01 100.6237959 MHz

===== CHANNEL f2 =====  
CPDPRG2 waltz16

NUC2 1H  
PCPD2 107.50 usec  
PL2 0.00 dB  
PL12 24.00 dB  
PL13 24.00 dB  
SF02 400.1316005 MHz

F2 - Processing parameters

SI 32768  
SF 100.6127492 MHz  
WDW EM  
SSB 0  
LB 1.00 Hz  
GB 0  
PC 1.40

ID NMR plot parameters

CX 20.00 cm  
F1P 200.000 ppm  
F1 20122.55 Hz  
F2P 0.000 ppm  
F2 0.00 Hz  
FREQCM 10.00000 ppm/cm  
HZCM 1006.12744 Hz/cm

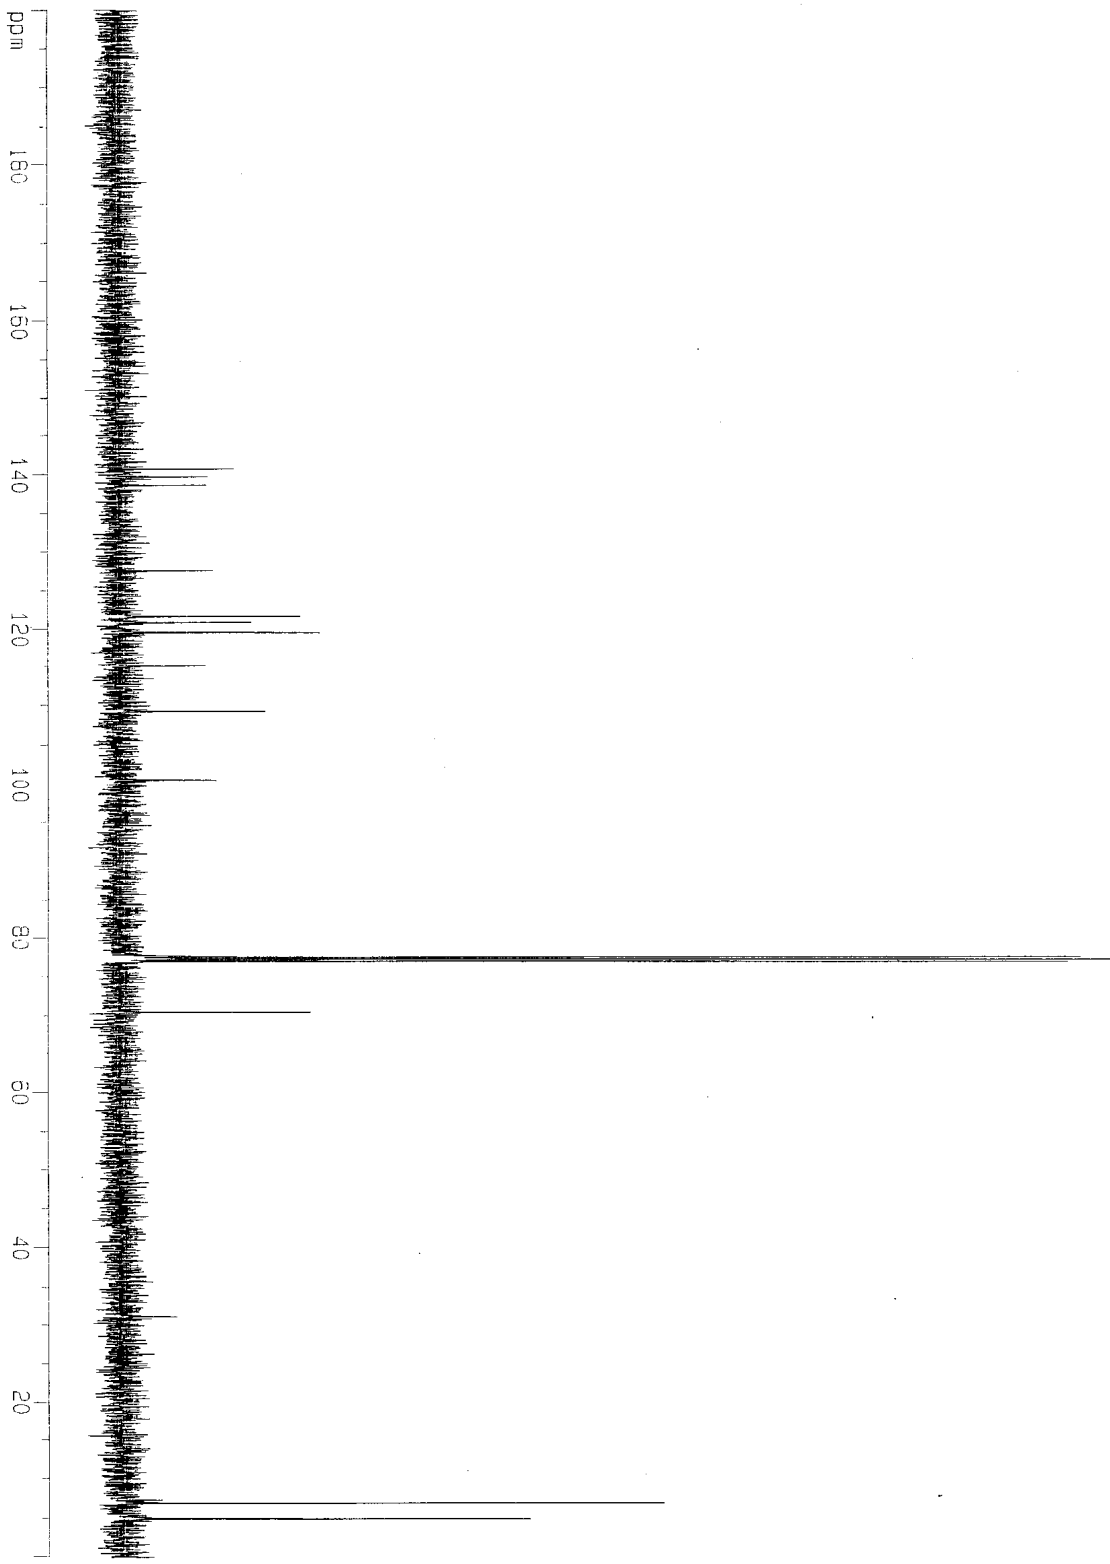

SN050721

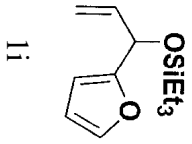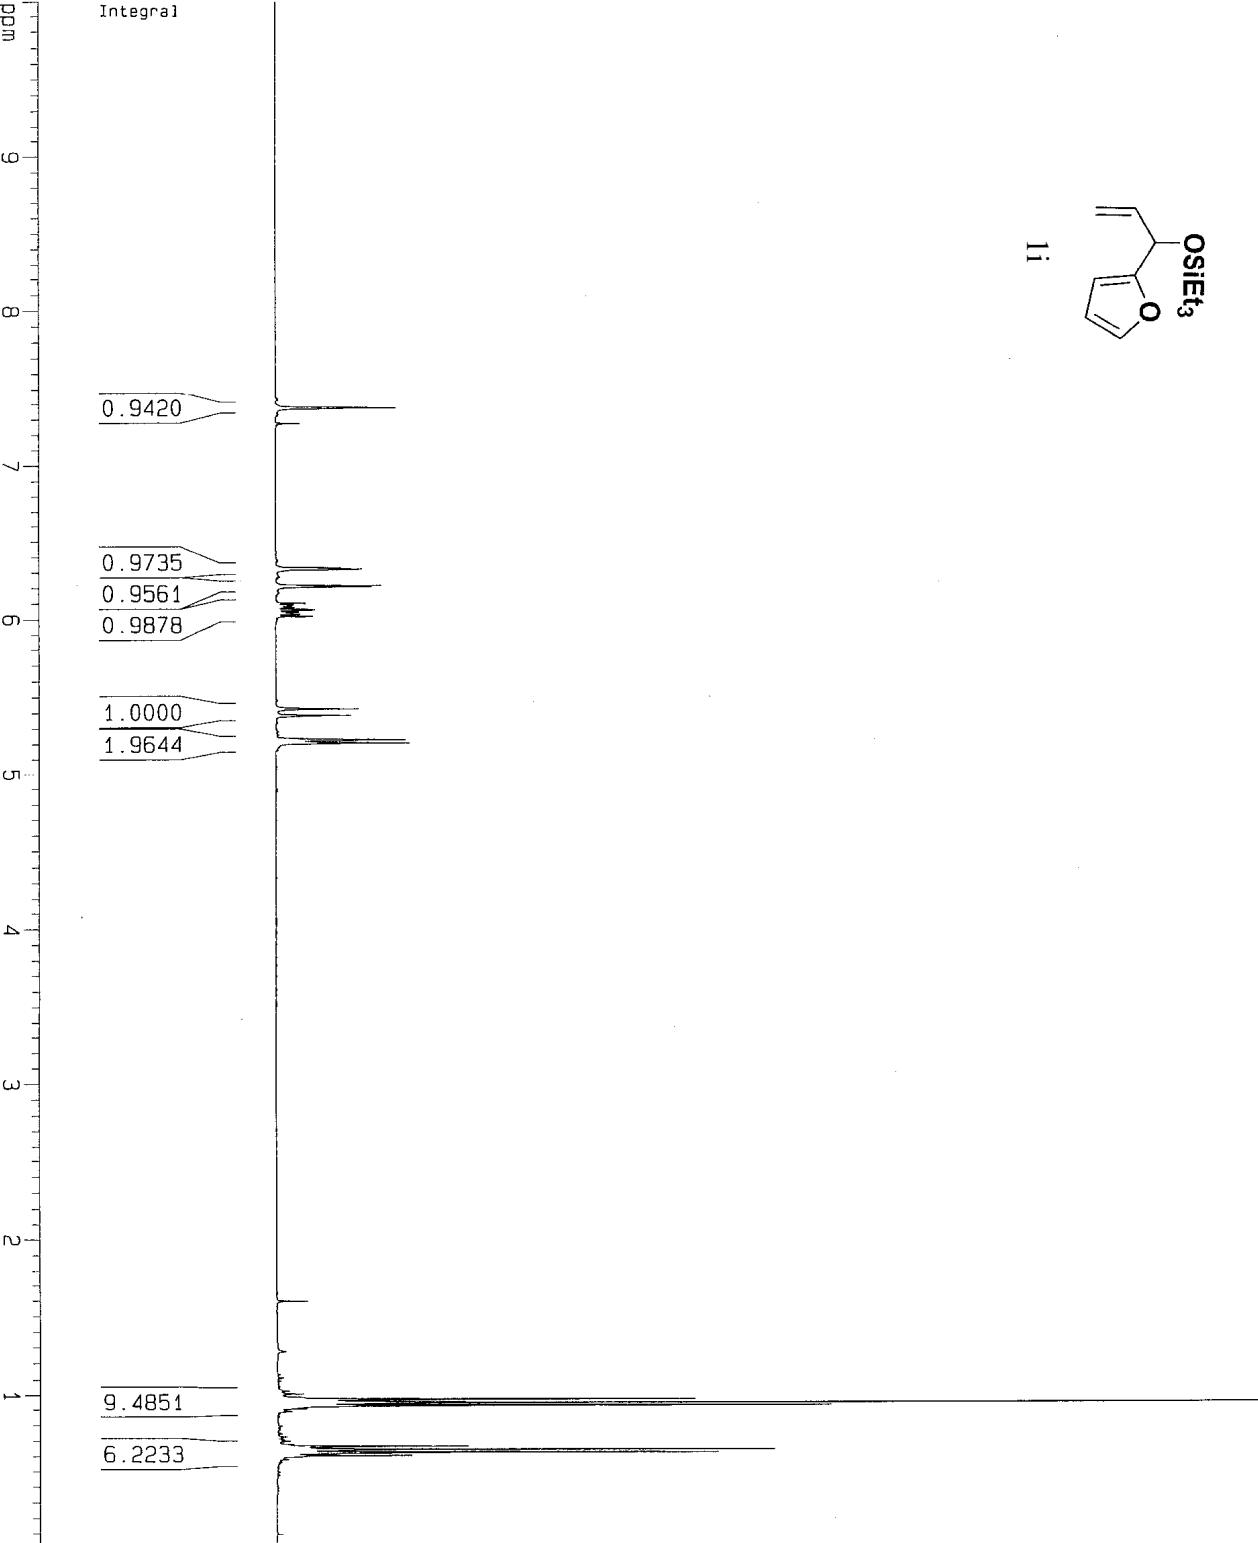

Current Data Parameters  
NAME SN721-maj-H  
EXPNO 1  
PROCNO 1

F2 - Acquisition Parameters  
Date\_ 20050720  
Time 12.24

INSTRUM spect  
PROBHD 5mm BBO BB-1  
PULPROG zg30  
TD 65536  
SOLVENT CDCl3  
NS 4  
DS 2

SWH 6278.146 Hz  
FIDRES 0.126314 Hz  
AQ 3.9584243 sec  
RG 50.8  
DM 60.400 usec  
DE 6.00 usec  
TE 300.0 K

D1 1.00000000 sec  
===== CHANNEL f1 =====

NUC1 1H  
P1 7.90 usec  
PL1 0.00 dB  
SF01 400.1324710 MHz

F2 - Processing parameters  
SI 32768  
SF 400.1300056 MHz  
WDW EM  
SSB 0  
LB 0.30 Hz  
GB 0  
PC 1.00

1D NMR plot parameters  
CX 20.00 cm  
F1P 10.000 ppm  
F1 4001.30 Hz  
F2P 0.000 ppm  
F2 0.00 Hz  
PPMCM 0.50000 ppm/cm  
HZCM 200.06500 Hz/cm

SN050721 major

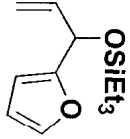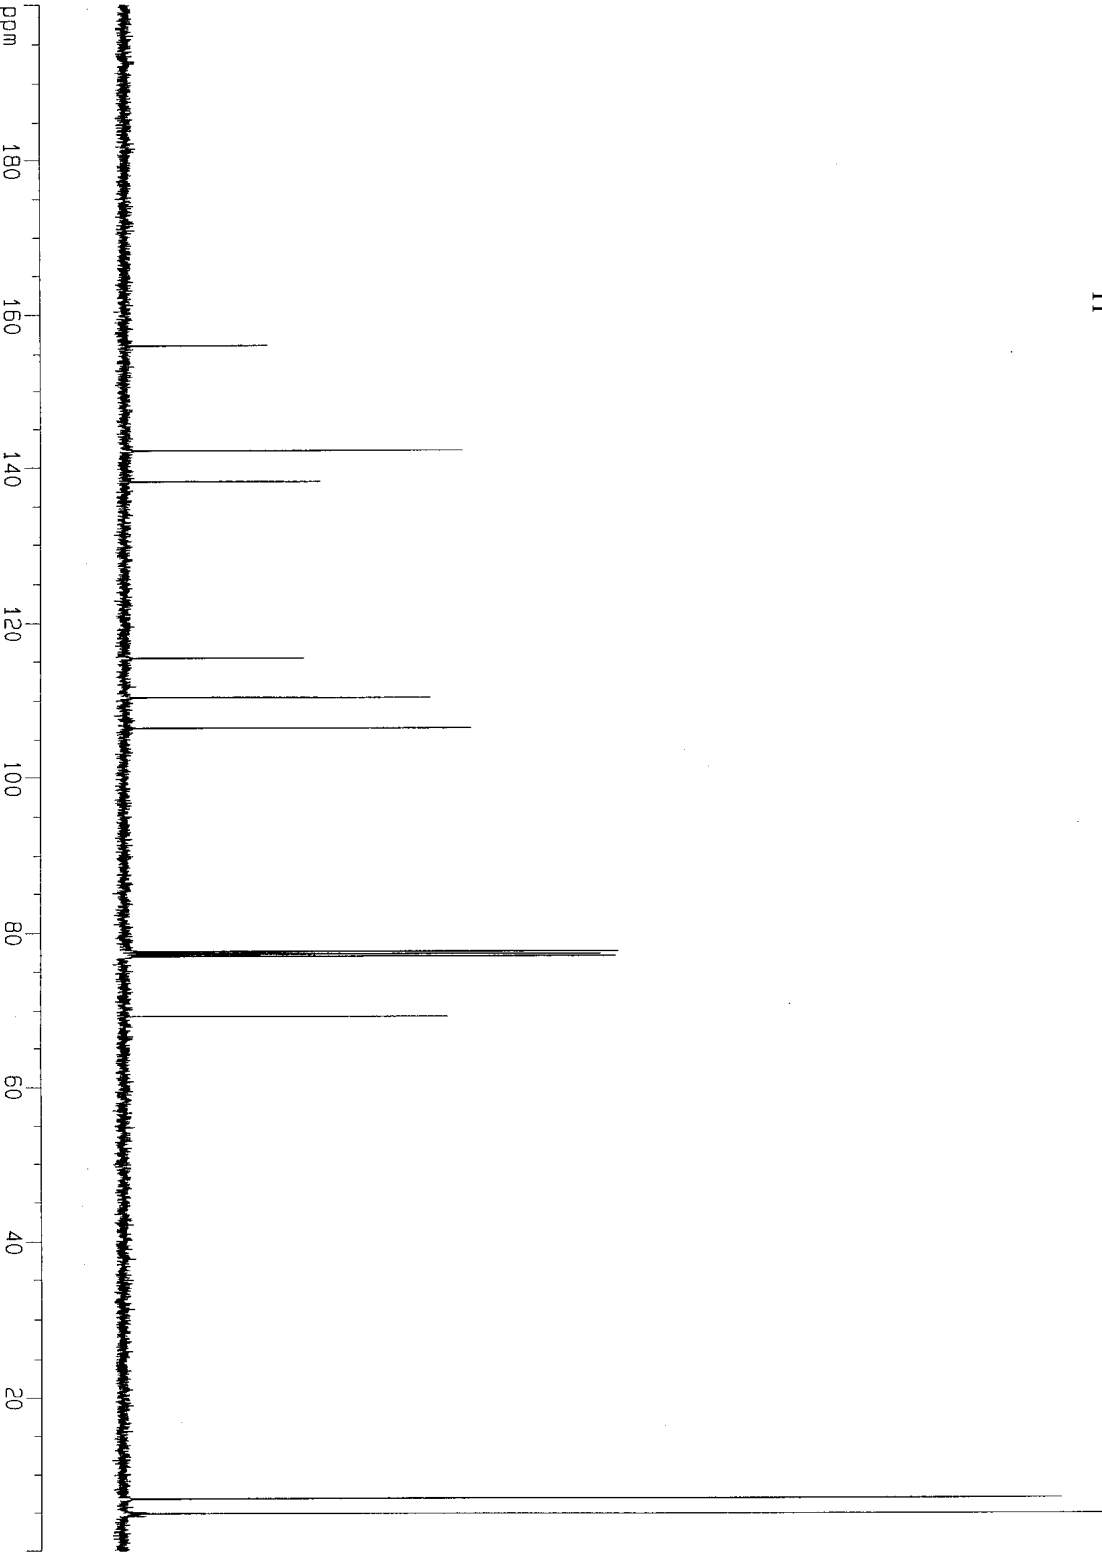

Current Data Parameters  
NAME SN721-C  
EXPNO 1  
PROCNO 1

F2 - Acquisition Parameters  
Date\_ 20050720  
Time 12.31

INSTRUM spect  
PROBHD 5mm BBO BB-1  
PULPROG zgpg30

TD 65536  
SOLVENT CDCl3  
NS 140  
DS 4

SWH 25125.629 Hz  
FIDRES 0.383387 Hz  
AQ 1.3042164 sec

RG 2048  
DM 19.900 usec  
DE 6.00 usec  
TE 300.0 K

D1 2.0000000 sec  
d11 0.0300000 sec  
d12 0.0000200 sec

===== CHANNEL f1 =====  
NUC1 13C  
P1 15.25 usec  
PL1 3.00 dB  
SF01 100.6237959 MHz

===== CHANNEL f2 =====  
CPDPRG2 waltz16  
NUC2 1H  
PCPD2 107.50 usec  
PL2 0.00 dB  
PL12 24.00 dB  
PL13 24.00 dB  
SF02 400.1316005 MHz

F2 - Processing parameters  
SI 32768  
SF 100.6127499 MHz  
WDW EM  
SSB 0  
LB 1.00 Hz  
GB 0  
PC 1.40

1D NMR plot parameters  
CX 20.00 cm  
F1P 200.000 DDM  
F1 20122.55 Hz  
F2P 0.000 DDM  
F2 0.00 Hz  
PPMCM 10.00000 DDM/cm  
HZCM 1006.12744 Hz/cm

570

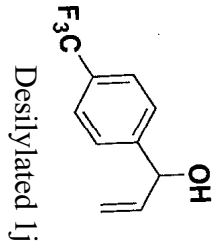

SN061118 OH

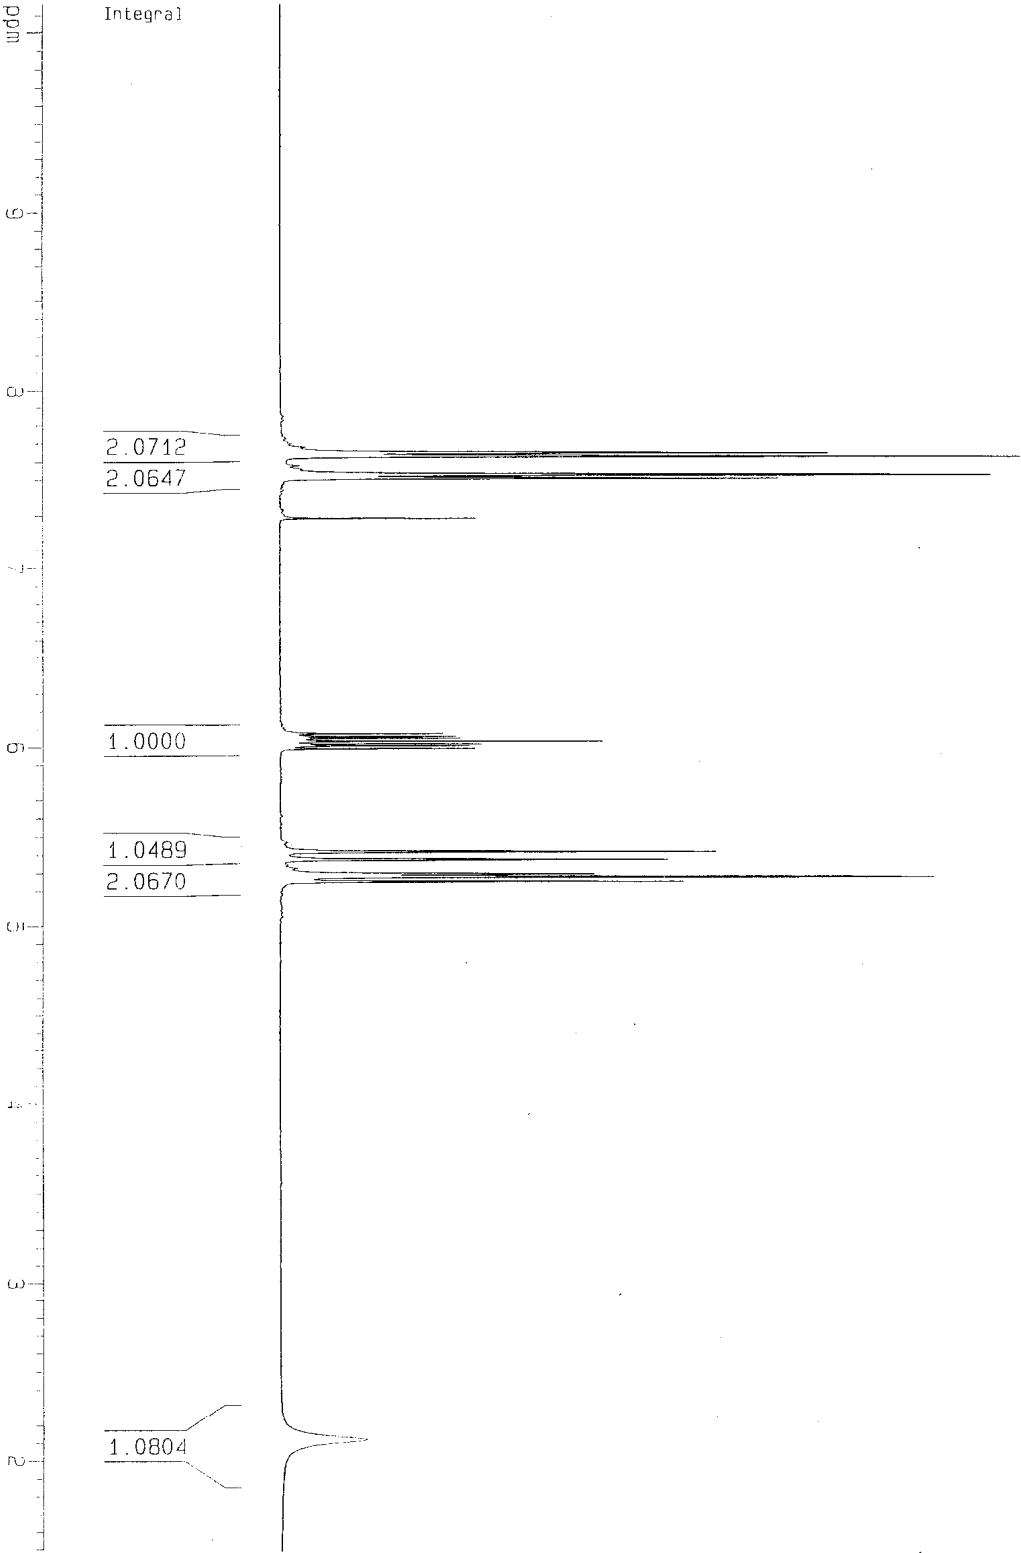

Current Data Parameters  
 NAME SN1118-OH-H  
 EXPNO 1  
 PROCNO 1

F2 - Acquisition Parameters  
 Date\_ 20060403  
 Time 20.32  
 INSTRUM spect  
 PROBHD 5mm BBO BB-1  
 PULPROG zg30  
 TD 65536  
 SOLVENT CDCl3  
 NS 4  
 DS 2  
 SWH 8278.146 Hz  
 FIDRES 0.126314 Hz  
 AQ 3.9584243 sec  
 RG 203.2  
 DW 60.400 usec  
 DE 6.00 usec  
 TE 300.0 K  
 D1 1.00000000 sec

==== CHANNEL f1 =====  
 NUC1 1H  
 P1 7.90 usec  
 PL1 0.00 dB  
 SF01 400.1324710 MHz

F2 - Processing parameters  
 SI 32768  
 SF 400.1300000 MHz  
 WDW EM  
 SSB 0  
 LB 0.30 Hz  
 GB 0  
 PC 1.00

1D NMR plot parameters  
 CX 20.00 cm  
 F1P 10.165 ppm  
 F1 4067.20 Hz  
 F2P 1.490 ppm  
 F2 596.32 Hz  
 PPMOH 0.43372 ppm/cm  
 HZOH 173.54408 Hz/cm

SN061118\_0H

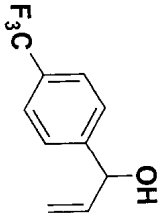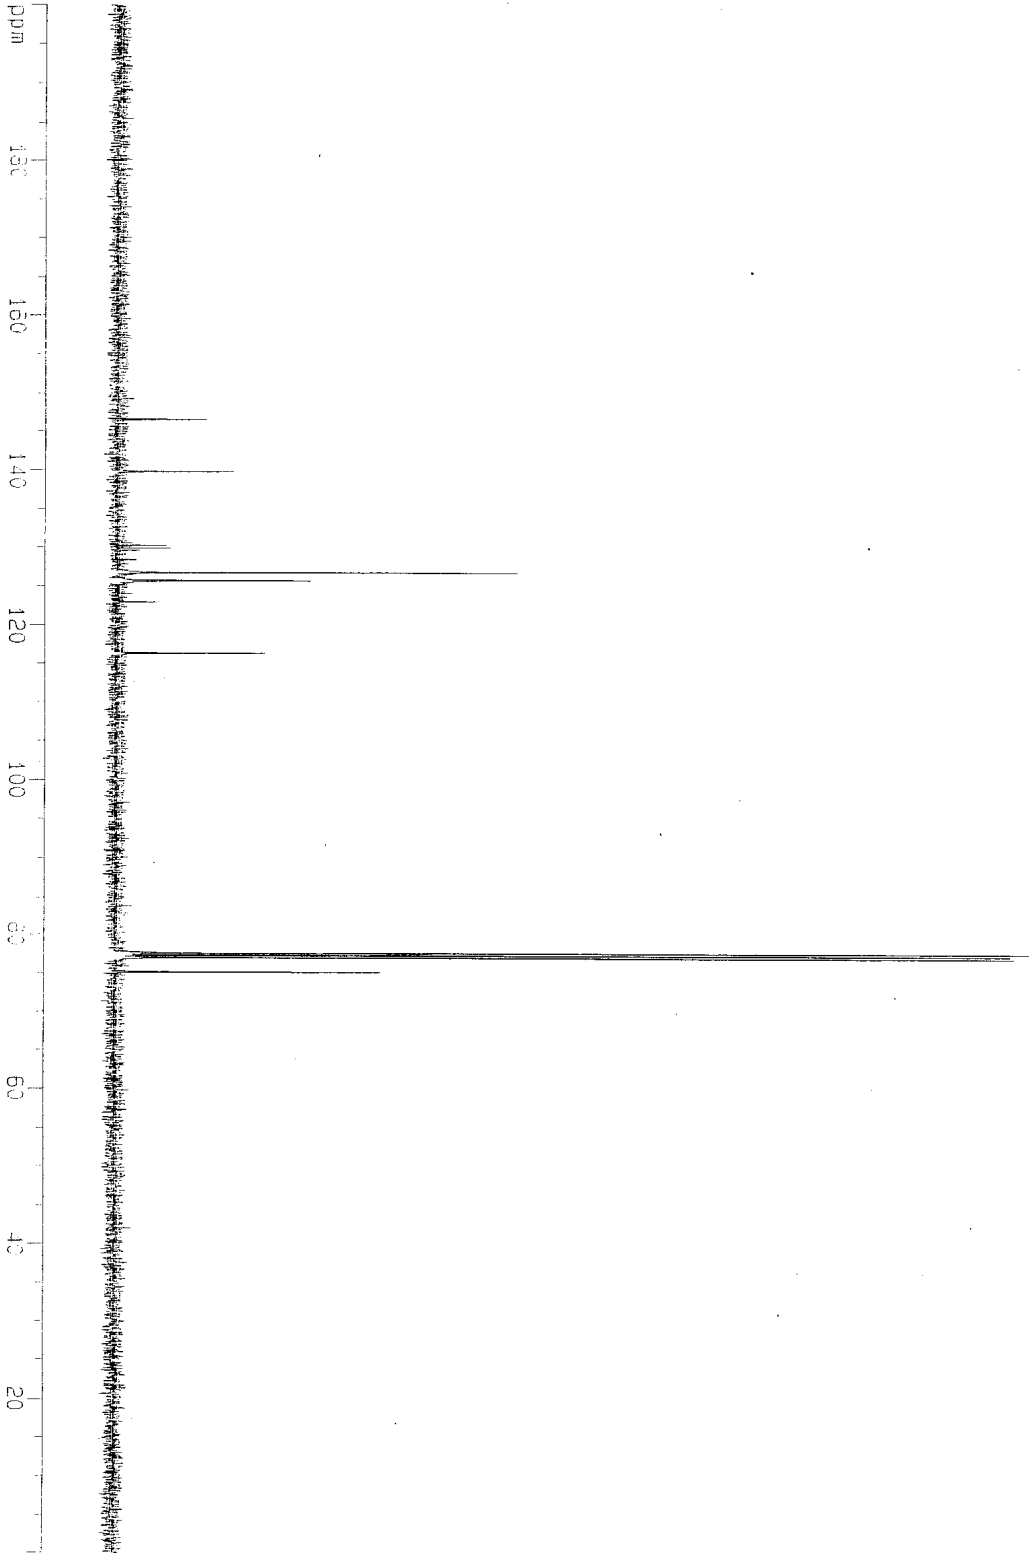

Current Data Parameters  
NAME SN1118-0H-C  
EXPNO 1  
PROCNO 1

F2 - Acquisition Parameters  
Date\_ 20060403  
Time 20.22

INSTRUM spect  
PROBHD 5mm BBO BB-1  
PULPROG zgpg30  
TD 65536  
SOLVENT CDCl3  
NS 946  
DS 4  
SWH 25125.629 Hz  
FIDRES 0.39397 Hz  
AQ 1.3042164 sec  
RG 1629.5  
DM 19.900 usec  
DE 6.00 usec  
TE 300.0 K  
D1 2.00000000 sec  
d11 0.03000000 sec  
d12 0.00002000 sec

CHANNEL f1  
NUC1 13C  
P1 15.25 usec  
PL1 3.00 dB  
SF01 100.6237959 MHz

CHANNEL f2  
CPDPRG2 waltz16  
NUC2 1H  
PCPD2 107.50 usec  
PL2 0.00 dB  
PL12 24.00 dB  
PL13 24.00 dB  
SF02 400.1316005 MHz

F2 - Processing Parameters  
SI 32768  
SF 100.6127492 MHz  
WDW EM  
SSB 0  
LB 1.00 Hz  
GB 0  
PC 1.40

1D NMR plot parameters  
CX 20.00 cm  
F1P 200.000 ppm  
F1 20122.55 Hz  
F2P 0.000 ppm  
F2 0.00 Hz  
FPMW 10.000000 ppm/cm  
HZCH 1006.12744 Hz/cm



SN051118 OH

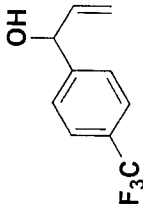

Desilylated Ij

ppm  
-66.812

Current Data Parameters  
NAME SN1118-OH-F  
EXPNO 1  
PROCNO 1

F2 - Acquisition Parameters  
Date\_ 20060403  
Time 18.34  
INSTRUM spect  
PROBHD 5 mm QNP 1H/1  
PULPROG zgfg1qn  
TD 131072  
SOLVENT C6D6  
NS 28  
DS 4  
SWH 75187.969 Hz  
FIDRES 0.573639 Hz  
AQ 0.8716788 sec  
RG 6502  
DM 6.650 usec  
DE 6.00 usec  
TE 291.5 K  
D1 1.0000000 sec

==== CHANNEL f1 =====  
NUC1 19F  
P1 19.50 usec  
PL1 -4.00 dB  
SF01 376.4607044 MHz

F2 - Processing parameters  
SI 65536  
SF 376.5000000 MHz  
WDW EM  
SSB 0  
LB 0.30 Hz  
GB 0  
PC 1.00

1D NMR plot parameters  
CX 20.00 cm  
CY 12.50 cm  
F1P -20.000 ppm  
F1 -7530.00 Hz  
F2P -100.000 ppm  
F2 -37650.00 Hz  
PPMCM 4.0000 ppm/cm  
HZCM 1506.00000 Hz/cm

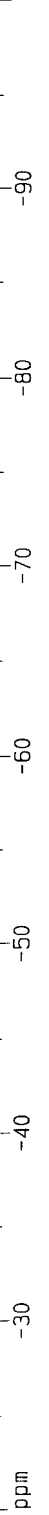

SN061117

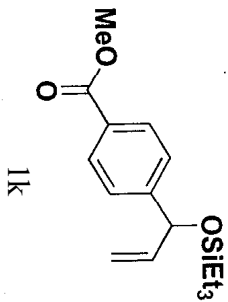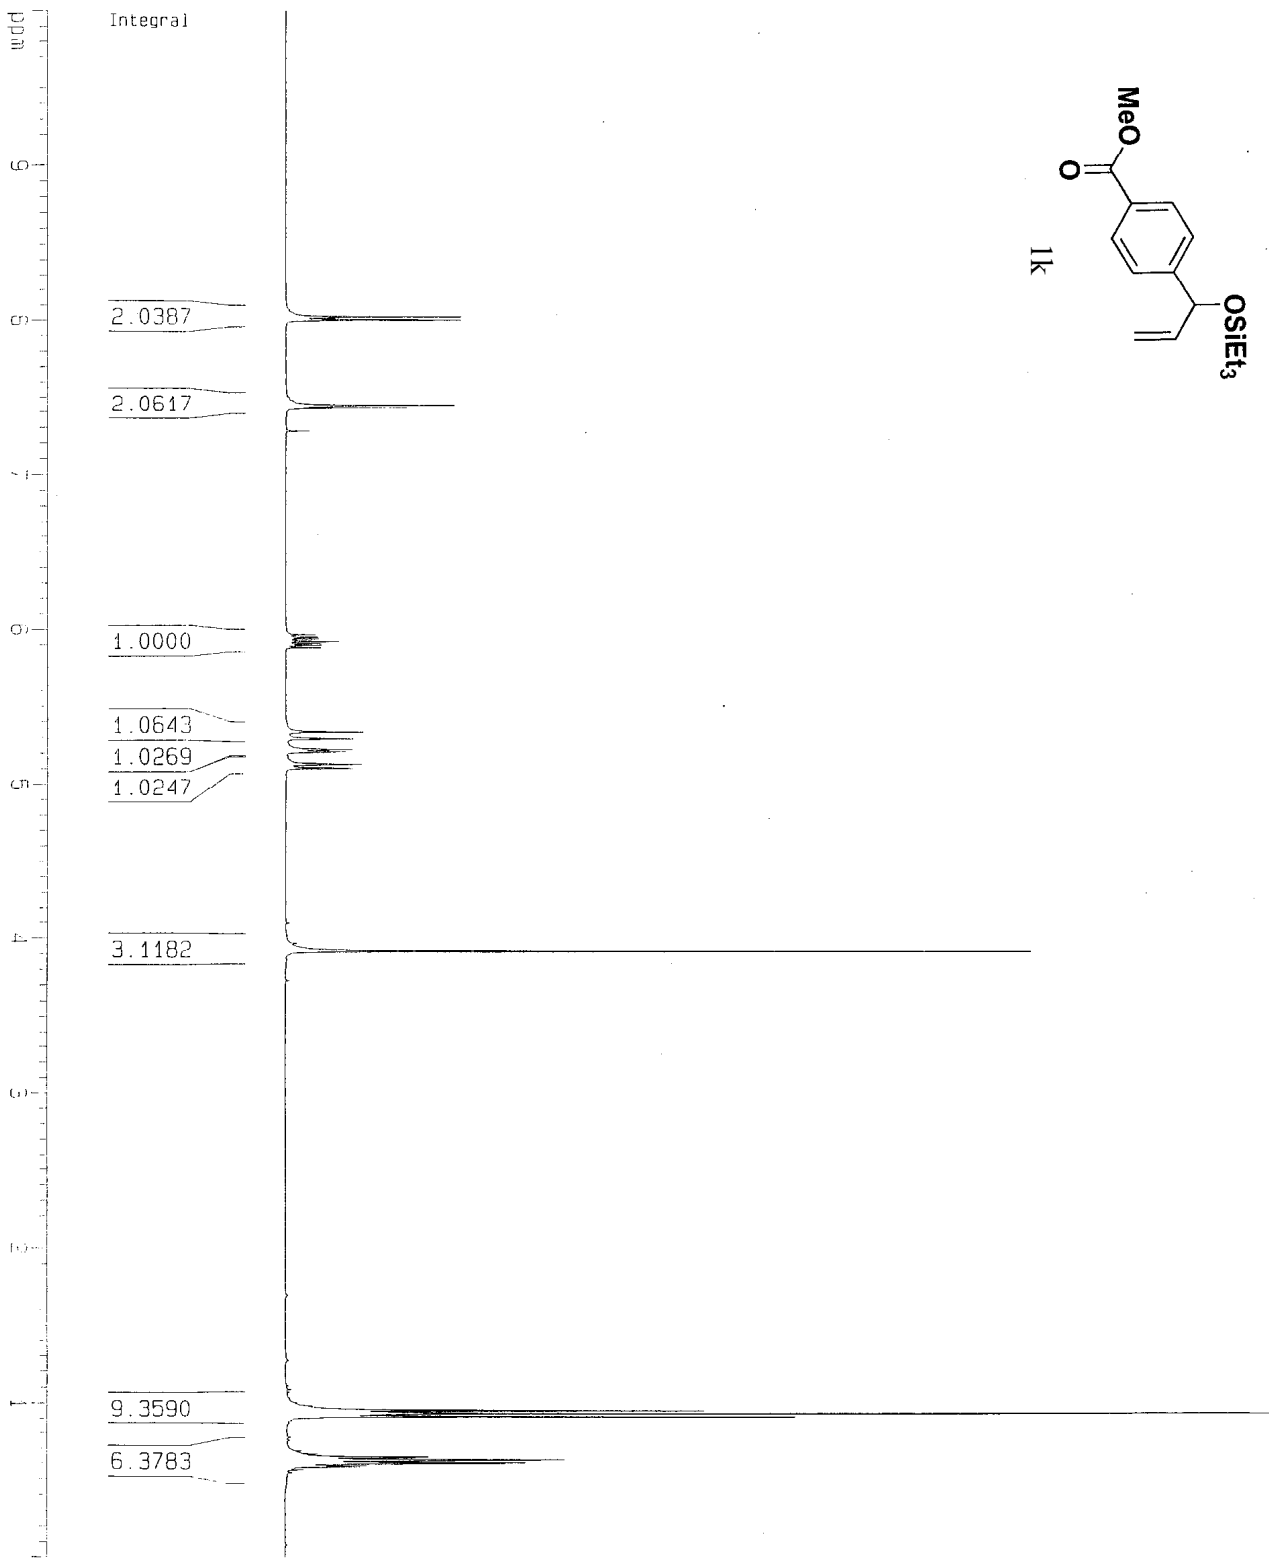

Current Data Parameters  
NAME SN117-H2  
EXPNO 1  
PROCNO 1

F2 - Acquisition Parameters  
Date\_ 20060403  
Time 18.10  
INSTRUM spect  
PROBHD 5mm BBO BB-1  
PULPROG zg30  
TD 65536  
SOLVENT CDCl3  
DS 2  
SWH 8278.146 Hz  
FIDRES 0.126314 Hz  
AQ 3.9584243 sec  
RG 57  
DE 60.400 usec  
TE 300.0 K  
D1 1.00000000 sec

==== CHANNEL f1 =====  
NUC1 1H  
P1 7.90 usec  
PL1 0.00 dB  
SF01 400.1324710 MHz

F2 - Processing parameters  
SI 32768  
SF 400.1300051 MHz  
WDW EM  
SSB 0  
LB 0.30 Hz  
GB 0  
PC 1.00

1D NMR plot parameters  
CX 20.00 cm  
F1P 10.000 ppm  
F1 4001.30 Hz  
F2P 0.000 ppm  
F2 0.00 Hz  
FINDM 0.50000 ppm/cm  
HZCM 200.06500 Hz/cm

S74

SN051117

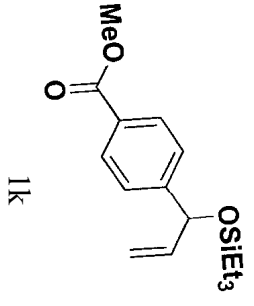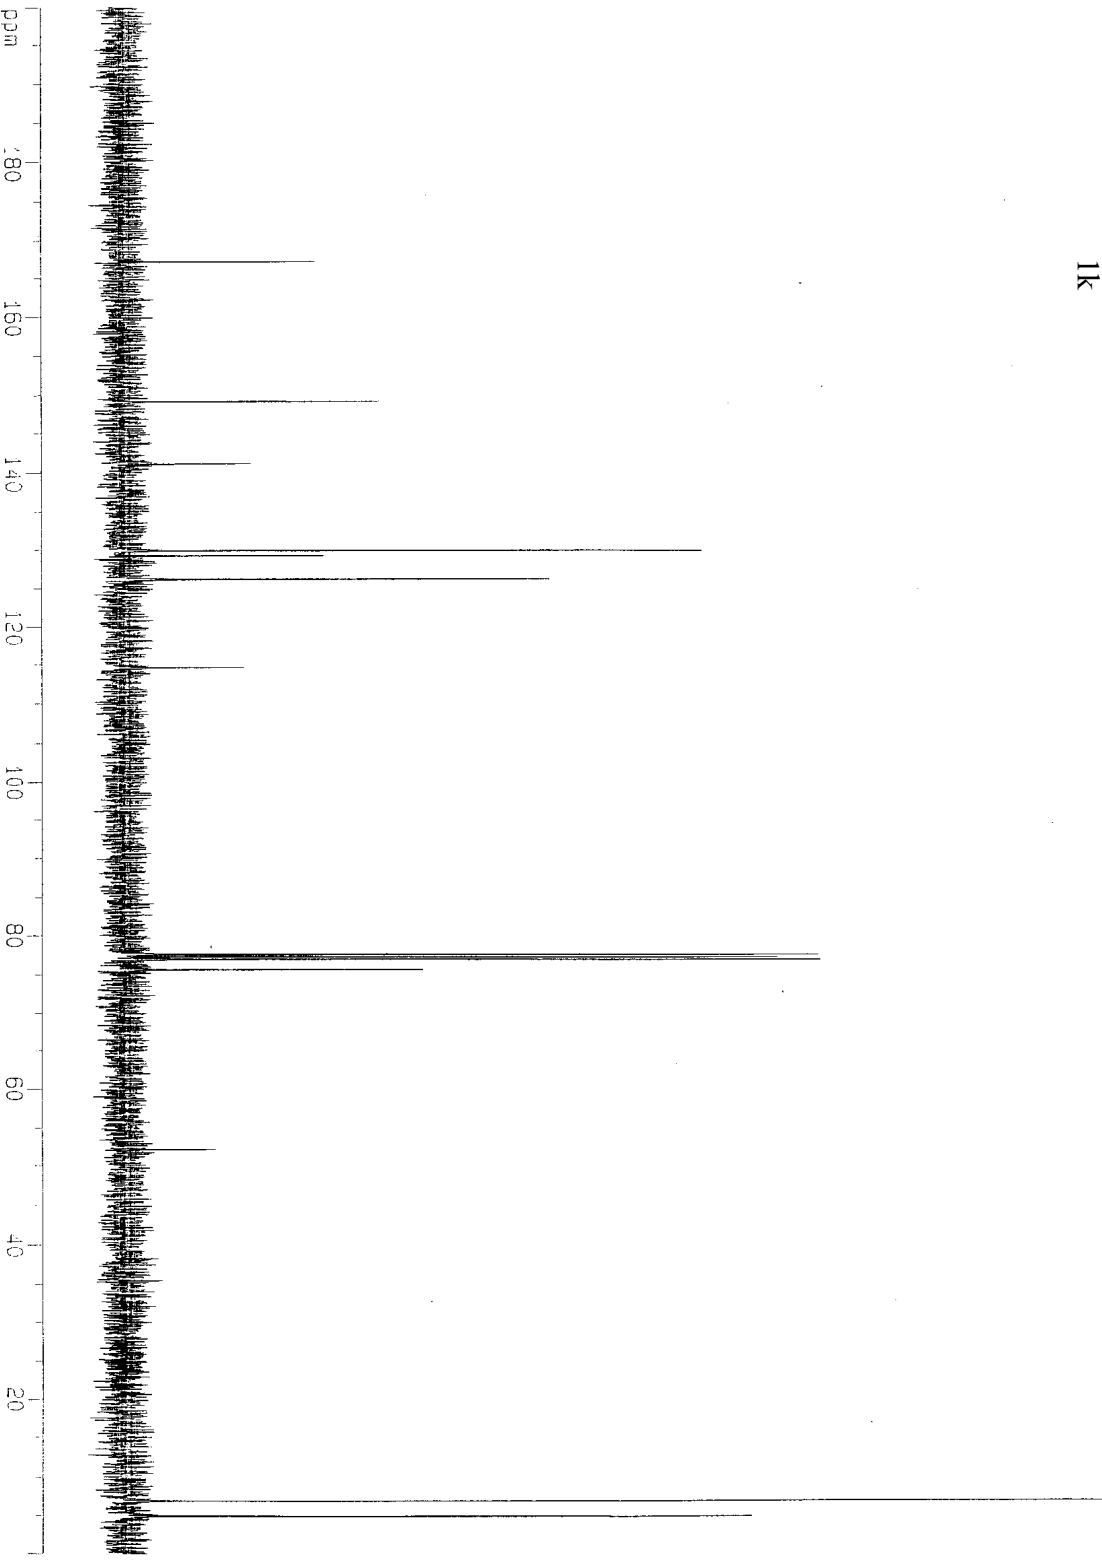

Current Data Parameters  
NAME SN1117-C2  
EXPNO 1  
PROCNO 1

F2 - Acquisition Parameters  
Date\_ 20050403  
Time 18:13

INSTRUM spect  
PROBHD 5mm BBO BB-1  
PULPROG zgpg30  
TD 65536  
SOLVENT CDCl3  
NS 84  
DS 4

SMH 25125.629 Hz  
FIDRES 0.383387 Hz  
AQ 1.3042164 sec  
RG 2048

DW 19.900 usec  
DE 6.00 usec  
TE 300.0 K

D1 2.00000000 sec  
d11 0.03600000 sec  
d12 0.00002000 sec

==== CHANNEL f1 =====

NUC1 13C  
P1 15.25 usec  
PL1 3.00 dB  
SF01 100.6237959 MHz

==== CHANNEL f2 =====

CPDPRG2 wa1tz16  
NUC2 1H  
PCPD2 107.50 usec  
PL2 0.00 dB  
PL12 24.00 dB  
PL13 24.00 dB  
SF02 400.1315005 MHz

F2 - Processing parameters

SI 32768  
SF 100.6127515 MHz  
WDW EM  
SSB 0  
LB 1.00 Hz  
GB 0  
PC 1.40

1D NMR plot parameters

CX 20.00 cm  
F1P 200.000 ppm  
F1 20122.55 Hz  
F2P 0.000 ppm  
F2 0.00 Hz  
PPMCM 10.00000 ppm/cm  
HZCM 1006.12756 Hz/cm

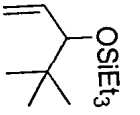

11

SN050733

Current Data Parameters  
 NAME SN733-H  
 EXPND 1  
 PROCNO 1

F2 - Acquisition Parameters  
 Date\_ 20050727  
 Time 22.00  
 INSTRUM spect  
 PROBHD 5mm BBO BB-1  
 PULPROG zg30  
 TD 65536  
 SOLVENT CDCl3  
 NS 4  
 DS 2  
 SWH 8278.146 Hz  
 FIDRES 0.126314 Hz  
 AQ 3.9584243 sec  
 RG 40.3  
 DW 80.400 usec  
 DE 6.00 usec  
 TE 300.0 K  
 D1 1.00000000 sec

===== CHANNEL f1 =====  
 NUC1 1H  
 P1 7.90 usec  
 PL1 0.00 dB  
 SFO1 400.1324710 MHz

F2 - Processing parameters  
 SI 32768  
 SF 400.1300056 MHz  
 MDM EM  
 SSB 0  
 LB 0.30 Hz  
 GB 0  
 PC 1.00

1D NMR plot parameters  
 CX 20.00 cm  
 F1P 10.000 ppm  
 F1 4001.30 Hz  
 F2P 0.000 ppm  
 F2 0.00 Hz  
 PPMCM 0.50000 DPM/cm  
 HZCM 200.06500 HZ/cm

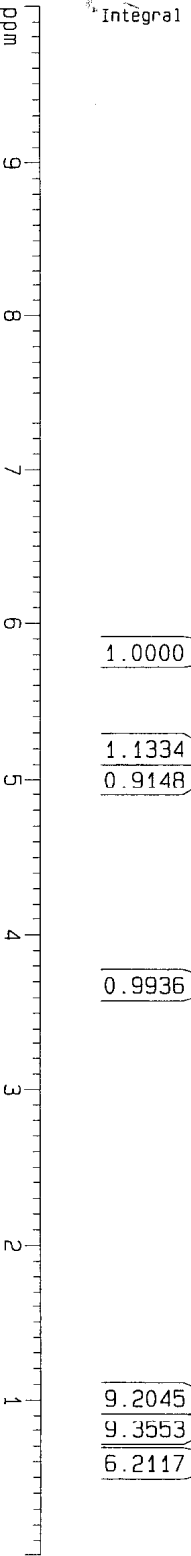

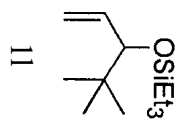

SNO50733

Current Data Parameters  
 NAME SN733-C  
 EXPNO 1  
 PROCNO 1

F2 - Acquisition Parameters  
 Date\_ 20050727  
 Time 22.05

INSTRUM spect  
 PROBHD 5mm BB0 BB-1  
 PULPROG zgpg30  
 TD 65536  
 SOLVENT CDCl3  
 NS 132  
 DS 4

SWH 25125.629 Hz  
 FIDRES 0.38387 Hz  
 AQ 1.3642164 sec  
 RG 4096

DW 19.900 usec  
 DE 6.00 usec  
 TE 300.0 K

D1 2.00000000 sec  
 d11 0.03600000 sec  
 d12 0.00002000 sec

===== CHANNEL f1 =====  
 NUC1 13C  
 P1 15.25 usec  
 PL1 3.00 dB  
 SF01 100.6237959 MHz

===== CHANNEL f2 =====  
 CPDPRG2 waltz16  
 NUC2 1H  
 PCPD2 107.50 usec  
 PL2 0.00 dB  
 PL12 24.00 dB  
 PL13 24.00 dB  
 SF02 400.1316005 MHz

F2 - Processing parameters  
 SI 32768  
 SF 100.6127469 MHz  
 WDW EM  
 SSB 0  
 LB 1.00 Hz  
 GB 0  
 PC 1.40

1D NMR plot parameters  
 CX 20.00 cm  
 F1P 200.000 ppm  
 F1 20122.55 Hz  
 F2P 0.000 ppm  
 F2 0.00 Hz  
 PPMCM 10.00000 ppm/cm  
 HZCM 1006.12744 Hz/cm

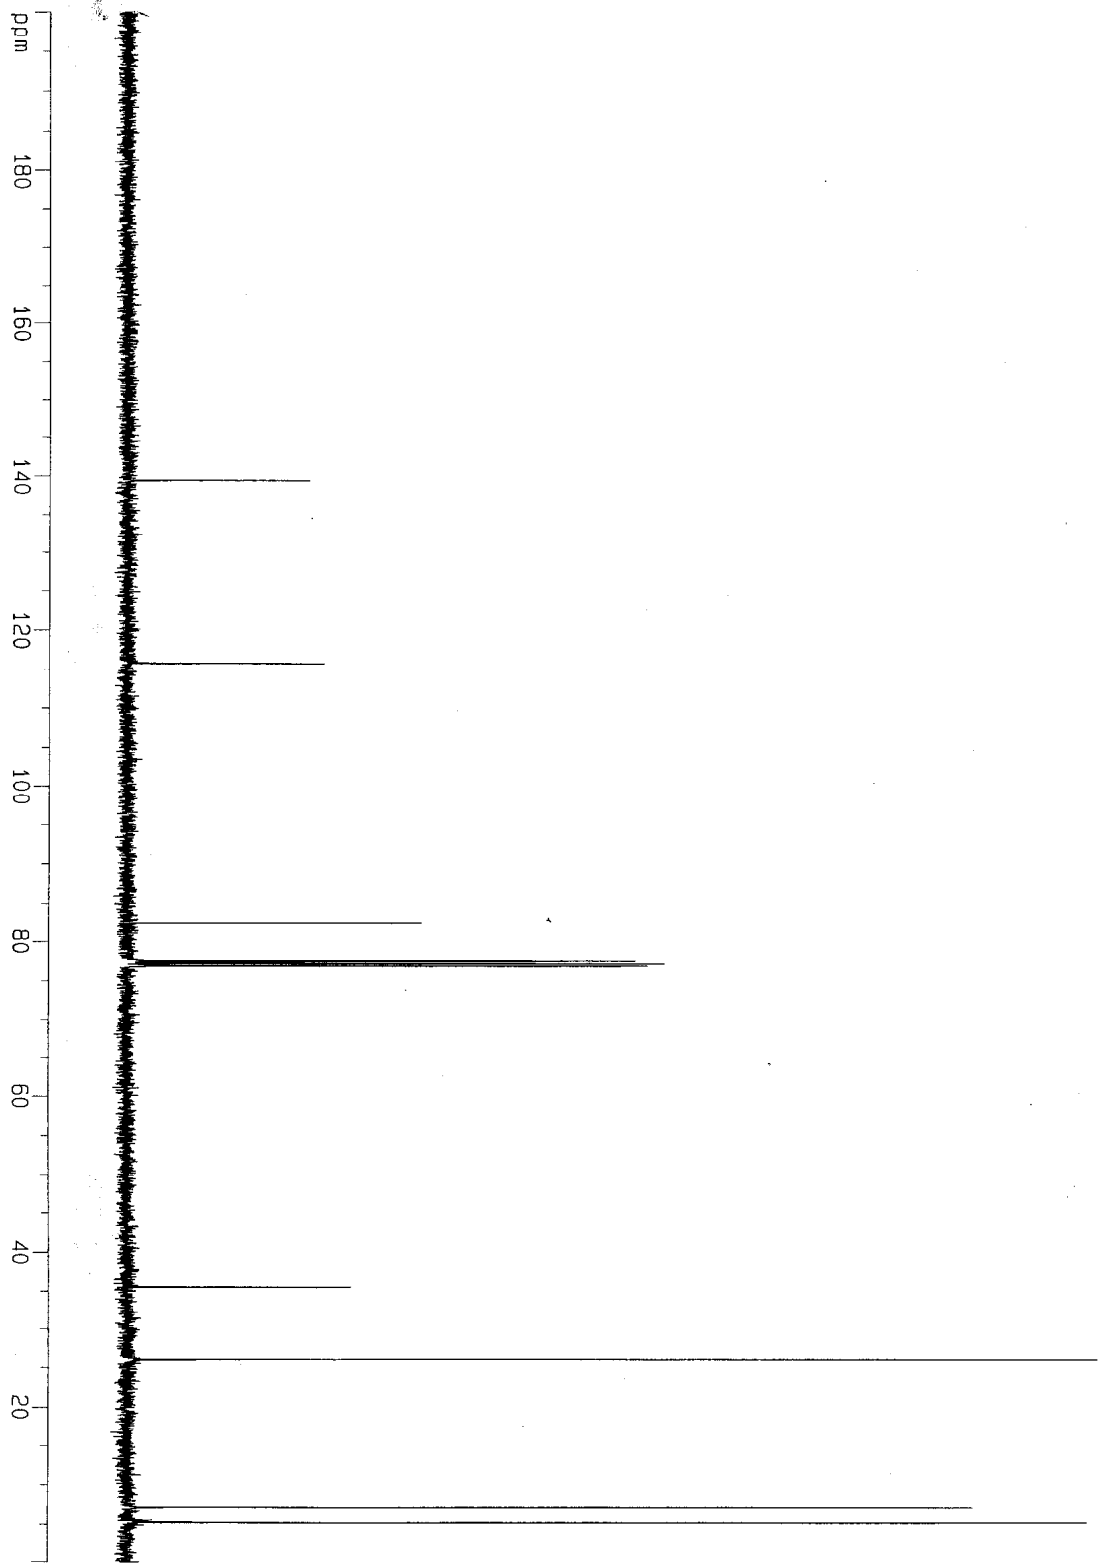

SN050745

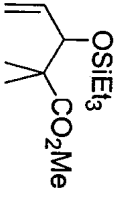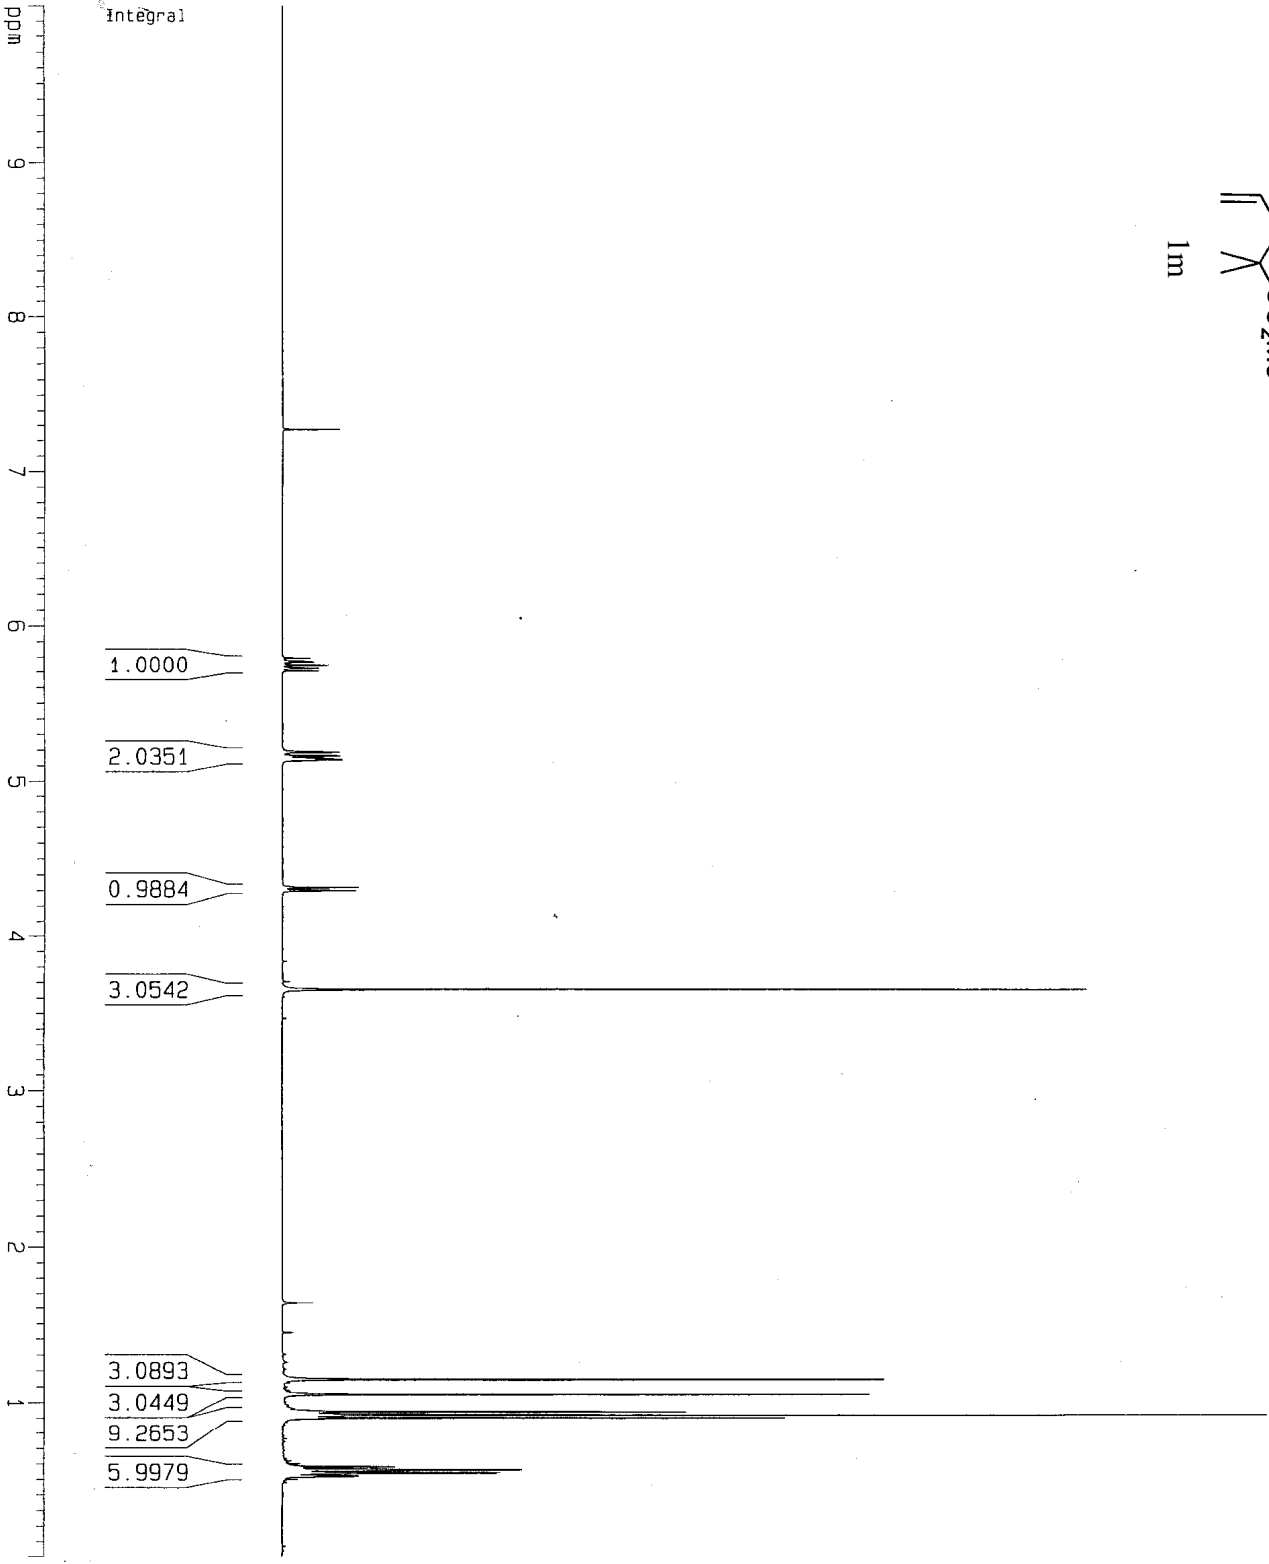

Current Data Parameters  
NAME SN745-H  
EXPNO 1  
PROCNO 1

F2 - Acquisition Parameters  
Date\_ 20050801  
Time 5.13  
INSTRUM spect  
PROBHD 5mm BBO BB-1  
PULPROG zg30  
TD 65536  
SOLVENT CDCl3  
NS 4  
DS 2  
SMH 8278.146 Hz  
FIDRES 0.126314 Hz  
AQ 3.9584243 sec  
RG 64  
DW 60.400 usec  
DE 6.00 usec  
TE 300.0 K  
D1 1.00000000 sec

===== CHANNEL f1 =====  
NUC1 1H  
P1 7.90 usec  
PL1 0.00 dB  
SF01 400.1324710 MHz

F2 - Processing parameters  
SI 32768  
SF 400.1300059 MHz  
WDW EM  
SSB 0  
LB 0.30 Hz  
GB 0  
PC 1.00

1D NMR plot parameters  
CX 20.00 cm  
F1p 10.000 ppm  
F1 4001.30 Hz  
F2p 0.000 ppm  
F2 0.00 Hz  
PPMCM 0.50000 ppm/cm  
HZCM 200.06500 Hz/cm

578

SN050745

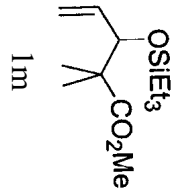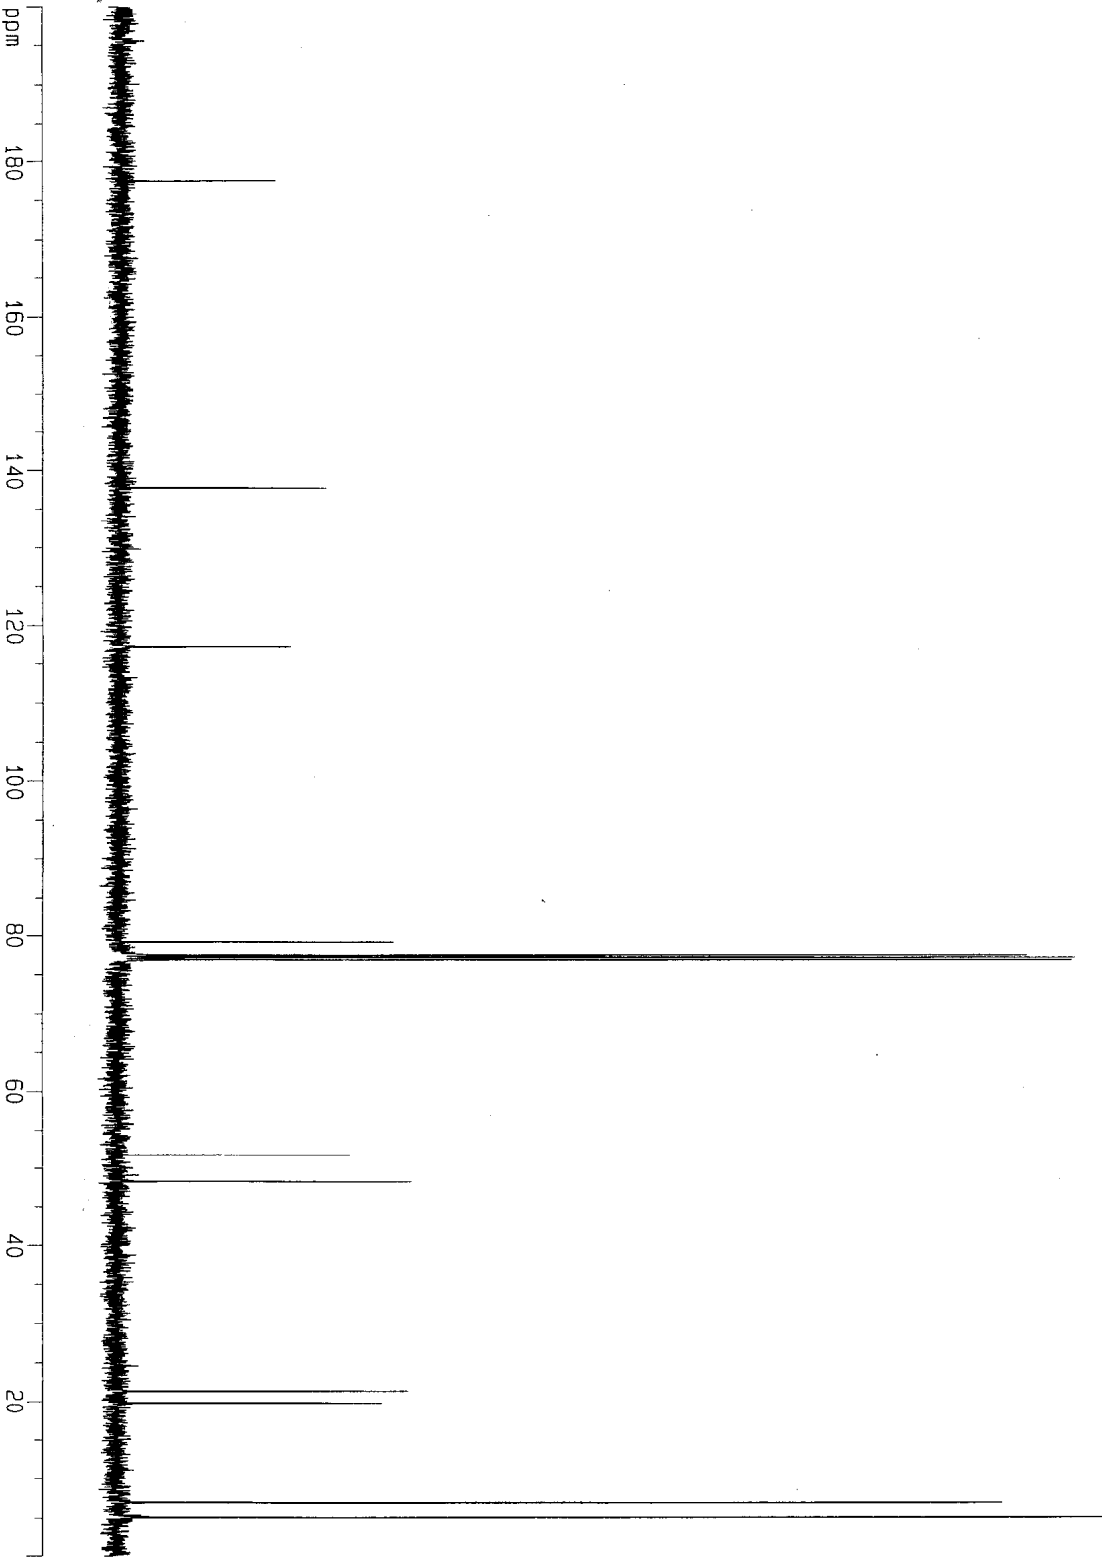

Current Data Parameters  
NAME SN745-C  
EXPNO 1  
PROCNO 1

F2 - Acquisition Parameters  
Date\_ 20050801  
Time 5.22

INSTRUM spect  
PROBHD 5mm BBO BB-1  
PULPROG zgpg30  
TD 65536  
SOLVENT CDCl3  
NS 150  
DS 4

SWH 25125.629 Hz  
FIDRES 0.383387 Hz  
AQ 1.3042164 sec  
RG 4096  
DW 19.900 usec  
DE 6.00 usec  
TE 300.0 K

D1 2.00000000 sec  
d11 0.03000000 sec  
d12 0.00002000 sec

===== CHANNEL f1 =====  
NUC1 13C  
P1 15.25 usec  
PL1 3.00 dB  
SFO1 100.6237959 MHz

===== CHANNEL f2 =====  
CPDPRG2 waltz16  
NUC2 1H  
PCPD2 107.50 usec  
PL2 0.00 dB  
PL12 24.00 dB  
PL13 24.00 dB  
SFO2 400.1315005 MHz

F2 - Processing Parameters  
SI 32768  
SF 100.5127492 MHz  
WDW EM  
SSB 0  
LB 1.00 Hz  
GB 0  
PC 1.40

1D NMR plot parameters  
CX 20.00 cm  
F1P 200.000 ppm  
F1 20122.55 Hz  
F2P 0.000 ppm  
F2 0.00 Hz  
PPMCM 10.00000 ppm/cm  
HZCM 1006.12744 Hz/cm

SN061104

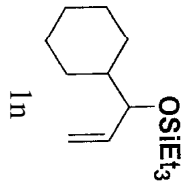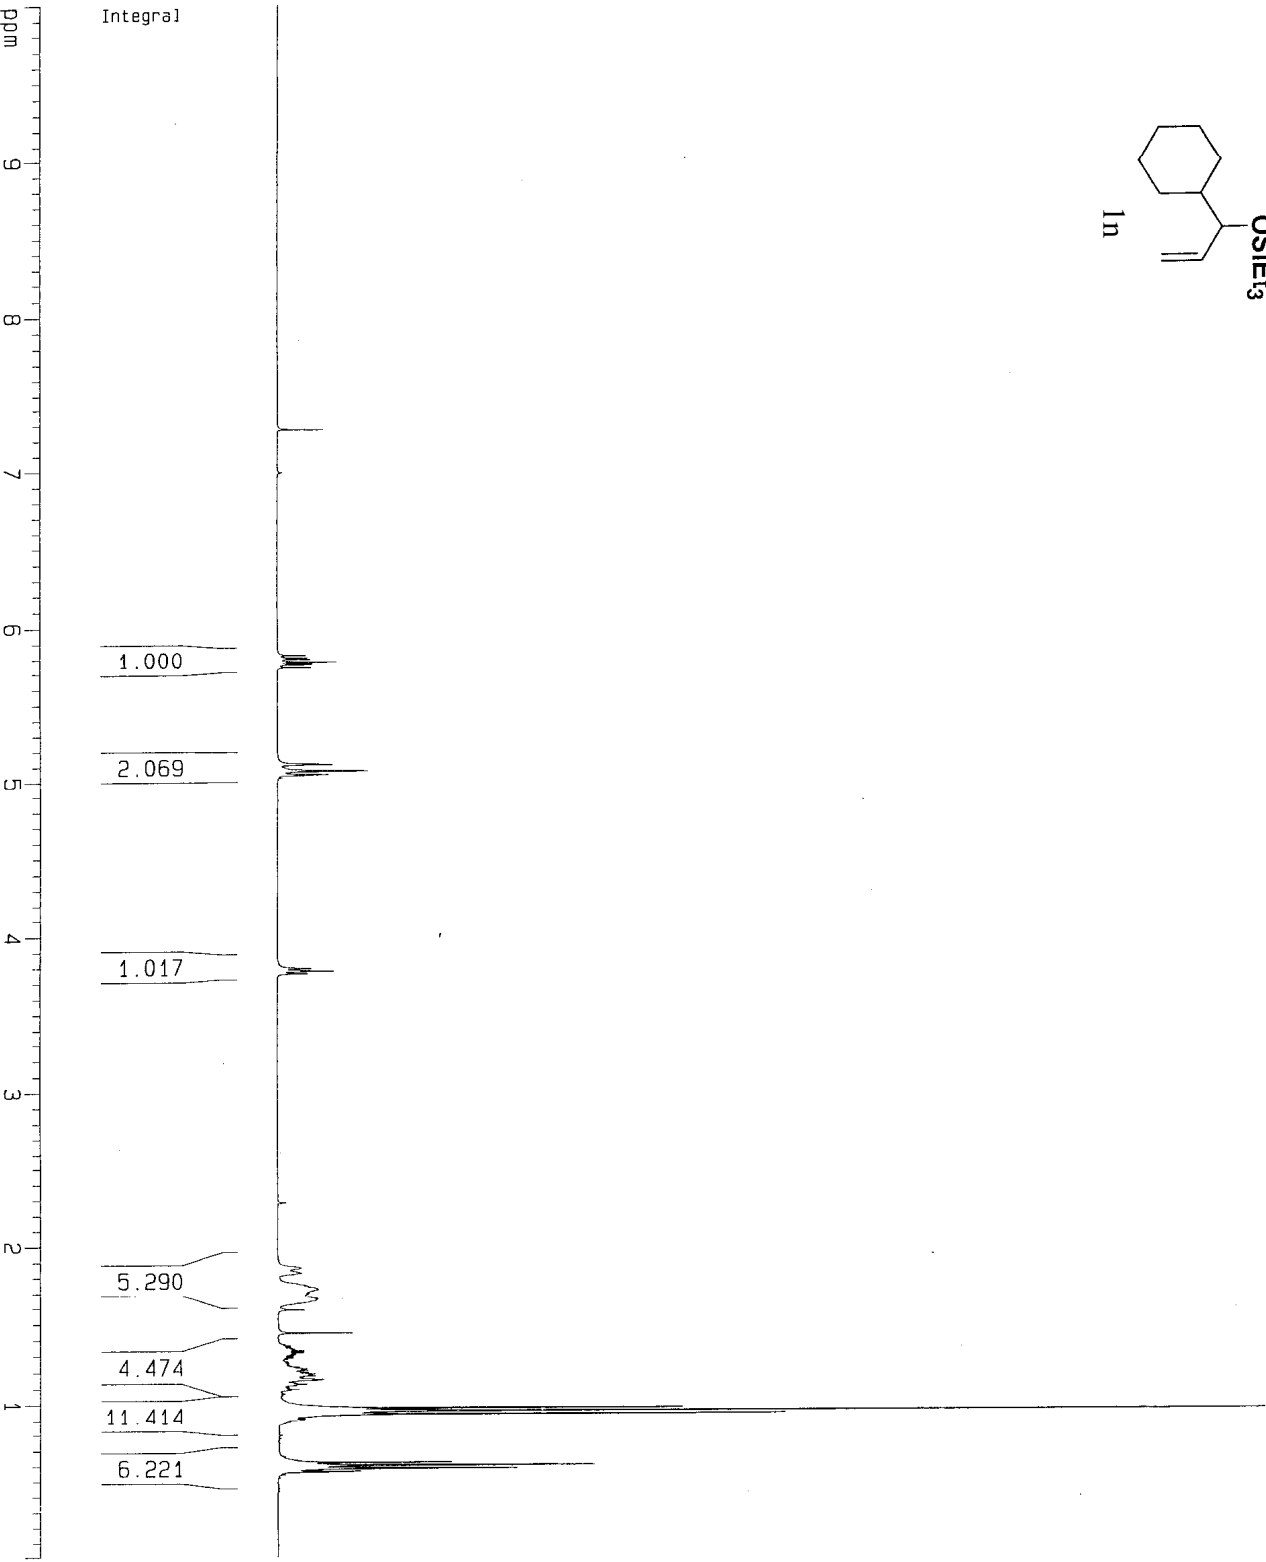

Current Data Parameters  
NAME SN1104-H  
EXPNO 1  
PROCNO 1

F2 - Acquisition Parameters

Date\_ 20060310  
Time 12.00  
INSTRUM spect  
PROBHD 5 mm QNP 1H/1  
PULPROG zg30  
TD 65536  
SOLVENT CDCl3  
NS 8  
DS 2  
SWH 8278.145 Hz  
FIDRES 0.126314 Hz  
AQ 3.9584243 sec  
RG 128  
DE 60.400 usec  
TE 292.5 K  
D1 1.0000000 sec  
MCREST 0.0000000 sec  
MCMRK 0.01500000 sec

===== CHANNEL f1 =====

NUC1 1H  
P1 9.88 usec  
PL1 3.00 dB  
SFO1 400.1324710 MHz

F2 - Processing parameters

SI 32768  
SF 400.1300054 MHz  
WDW EM  
SSB 0  
LB 0.30 Hz  
GB 0  
PC 1.00

10 NMR plot parameters

CX 20.00 cm  
CY 12.50 cm  
F1P 10.000 ppm  
F1 4001.30 Hz  
F2P 0.000 ppm  
F2 0.00 Hz  
PPMCM 0.50000 ppm/cm  
HZCV 200.06550 Hz/cm



SN061104

Solvent: CDCl3  
Ambient temperature  
User: I-14-87  
INOVA-500 "rocky"

PULSE SEQUENCE

Relax. delay 0.763 sec

Pulse 65.4 degrees

Acq. time 1.736 sec

Width 3735.8 Hz

64 repetitions

OBSERVE C13, 125.7832251 MHZ

DECUPLE H1, 500.2332753 MHZ

Power 37 dB

continuously on

WALTZ-16 modulated

DATA PROCESSING

Line broadening 0.3 Hz

FT size 131072

Total time 2 minutes

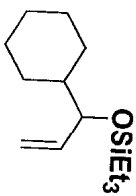

In

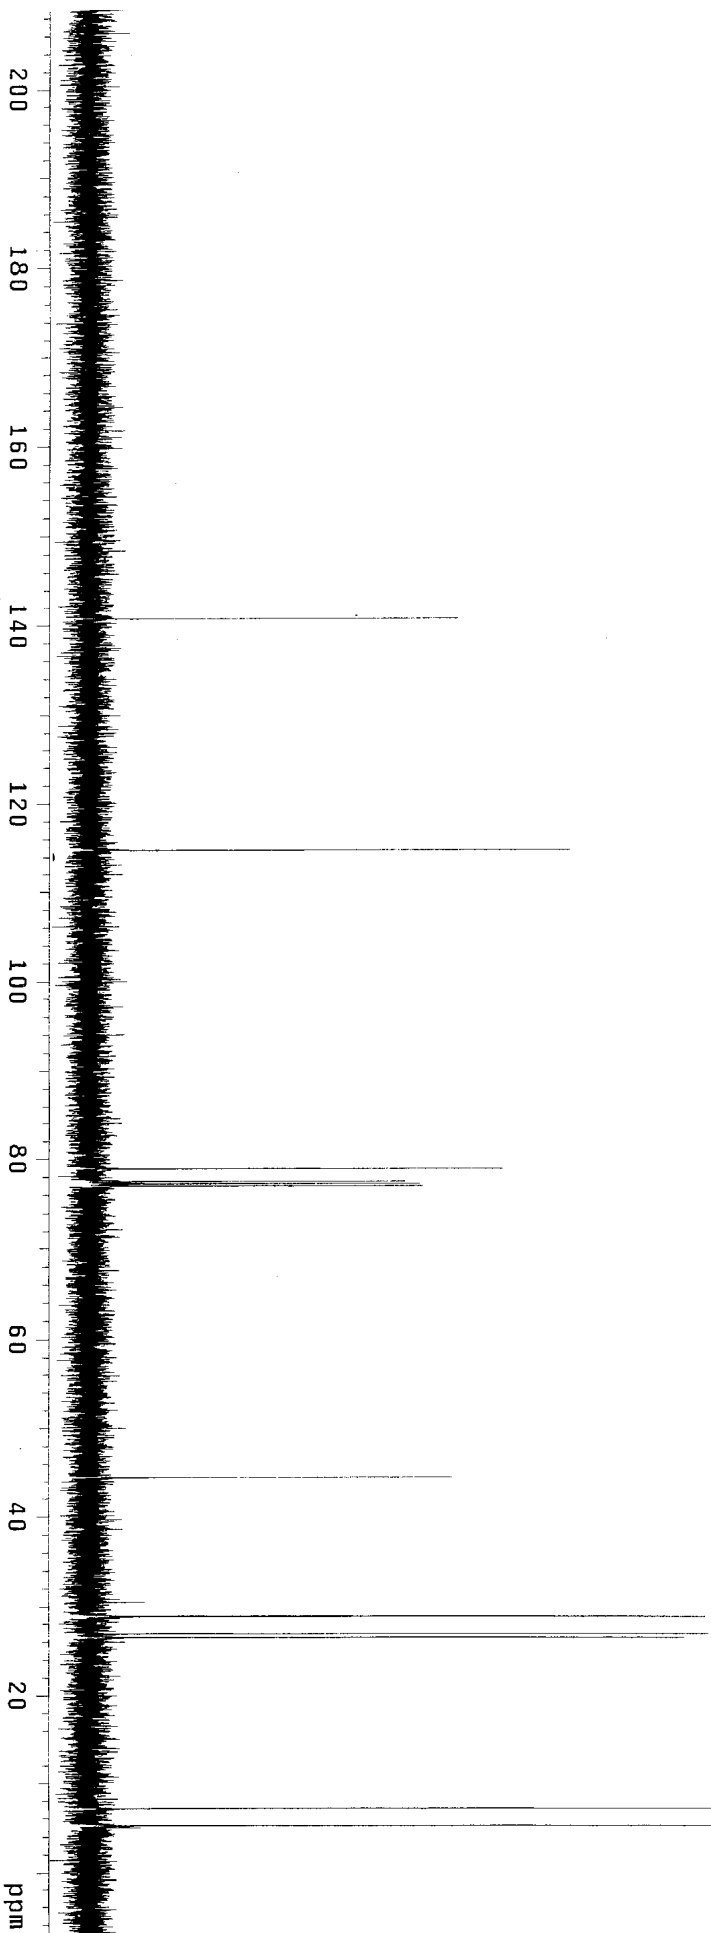

NY-8-89 H pdt

propene, H pdt

2a

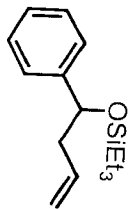

Current Data Parameters  
 NAME N0309-7601  
 EXPNO 1  
 PROCNO 1

F2 - Acquisition Parameters  
 Date\_ 20050112  
 Time 16.59  
 INSTRUM spect  
 PROBRD Shim B80 B8-1  
 PULPROG zg30  
 D0 2930  
 SOLVENT CCl<sub>4</sub>  
 NS 4  
 DS 2  
 SWH 8278.144 Hz  
 FIDRES 0.12634 Hz  
 AQ 3.3564243 sec  
 RG 35.4  
 DW 60.400 usec  
 DE 6.00 usec  
 TE 300.0 K  
 D1 1.00000000 sec

\*\*\*\*\* CHANNEL f1 \*\*\*\*\*  
 NUCL1 1H  
 P1 1.00  
 R1 7.50 usec  
 SFO1 400.1264710 MHz

F2 - Processing parameters  
 SI 32768  
 SF 400.1300016 MHz  
 KW EM  
 SSB 0  
 LB 0.30 Hz  
 GB 0  
 PC 1.00

LD NMR D10 Parameters  
 F2 24.00 cm  
 F1 10.530 Bpm  
 F0 420.00 Hz  
 F2P -200.07 Hz  
 F1P 0.45333 Bpm/cm  
 F2M 183.38291 Hz/cm

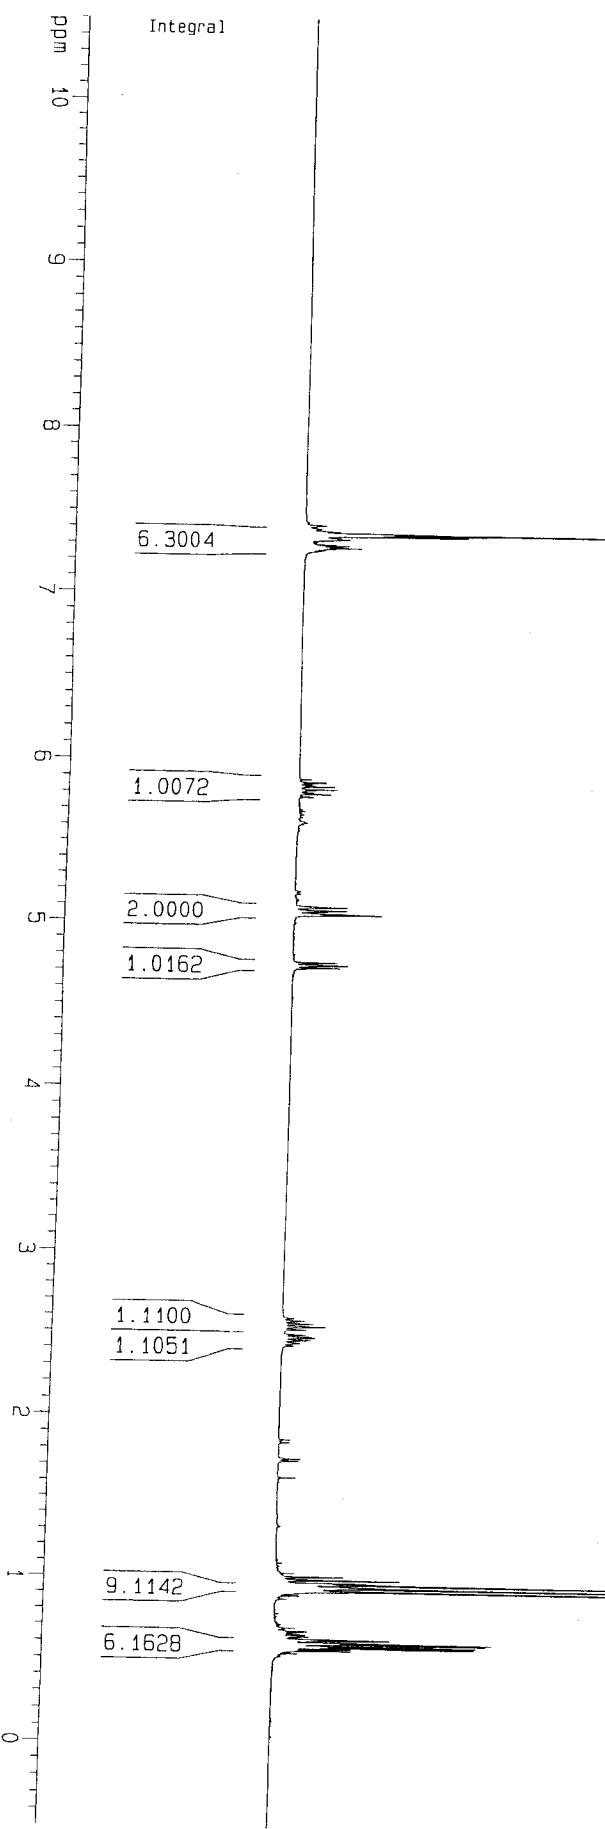

propene, H-pdt

2a

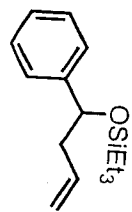

ppm

- 145.303
- 135.404
- 128.182
- 127.199
- 126.120
- 117.031
- 77.548
- 77.230
- 76.913
- 75.071
- 45.647
- 31
- 7.009
- 6.976
- 5.135
- 5.024

Current Data Parameters  
 NAME hcv8-09-hgdt  
 EXNO 2  
 PROCNO 1

F2 - Acquisition Parameters  
 Date\_ 20060112  
 Time 17.03  
 INSTRUM spect  
 PROBO 5mm BBP BB-1  
 PULPROG zgpg30  
 TD 65535  
 SFOVENT 140  
 NS 140  
 DS 140  
 SWH 24875.621 Hz  
 FIDRES 0.379572 Hz  
 AQ 1.3173235 sec  
 RG 1024  
 OW 20.100 usec  
 DE 6.00 usec  
 TE 300.0 K  
 D1 2.00000000 sec  
 d11 0.02000000 sec  
 d12 0.00000000 sec

\*\*\*\*\* CHANNEL f1 \*\*\*\*\*  
 NUC1 <sup>13</sup>C  
 P1 15.26 usec  
 PL1 3.00 dB  
 SFO1 100.6237959 MHz

\*\*\*\*\* CHANNEL f2 \*\*\*\*\*  
 CPDPRG2 waltz16  
 NUC2 <sup>1</sup>H  
 PULP2 107.50 usec  
 PC2 0.00 dB  
 PC12 24.00 dB  
 PC13 24.00 dB  
 SFO2 400.1316005 MHz

F2 - Processing parameters  
 SI 32768  
 SF 100.6127529 MHz  
 KW 64  
 EM 0  
 SSB 0  
 LB 1.00 Hz  
 GB 0  
 PC 1.40

10 NMR D101 Parameters  
 CK 24.00 cm  
 F1P 220.000 ppm  
 F2P 22134.80 Hz  
 F2 -10.000 ppm  
 F2 1006.13 Hz  
 PRNCK 32823 ppm/cm  
 HZCK 964.0531 Hz/cm

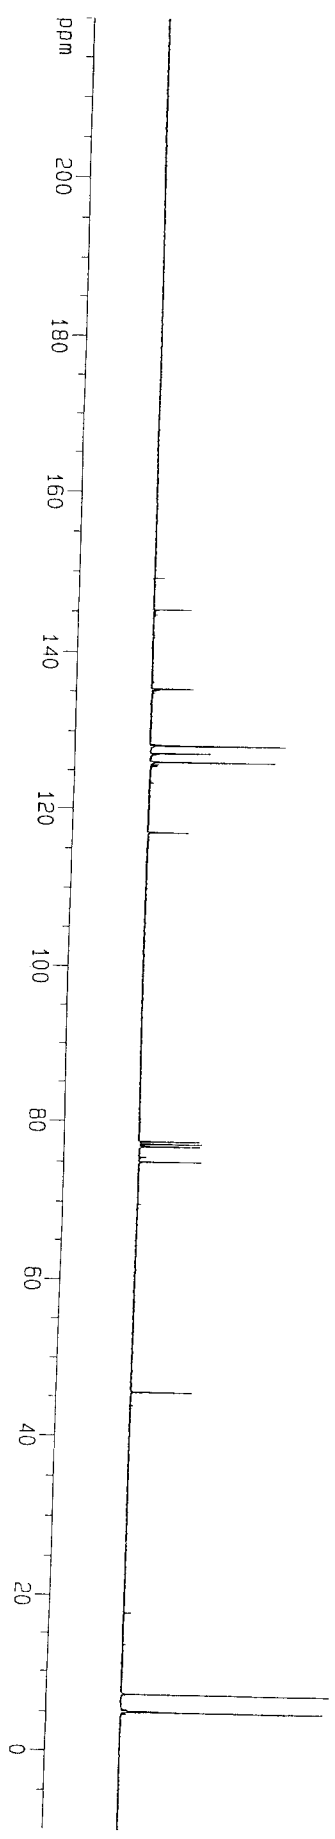

HCY - 8-89 Addt.

propene, A-pdt

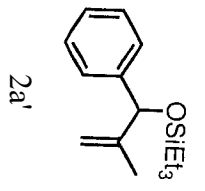

Current Data Parameters  
 NAME Ncy8-89-addt  
 EXPNO 1  
 PROCNO 1

F2 - Acquisition Parameters  
 Date\_ 20060112  
 Time 16.54  
 INSTRUM spect  
 PROBRD Ssm 860 B9-1  
 PULPROG zg30  
 ID 65536  
 SOLVENT CDCl3  
 NS 4  
 DS 2  
 SFR 8278.446 Hz  
 FIDRES 0.14524 Hz  
 AQ 3.958424 sec  
 RG 328.1  
 DM 60.400 usec  
 DE 6.00 usec  
 TE 300.0 K  
 D1 1.0000000 sec

\*\*\*\*\* CHANNEL f1 \*\*\*\*\*  
 NUCL1 1H  
 P1 7.90 usec  
 PL 0.00 dB  
 SFO1 400.1324710 MHz

F2 - Processing parameters  
 SI 32768  
 SF 400.1300016 MHz  
 KW 64  
 EN  
 MSB 0  
 SSB 0  
 LB 0.30 Hz  
 GB 0  
 PC 1.00

1D NMR plot parameters  
 CV 24.00 cm  
 F1 1.50000000 MHz  
 F1 420.132 MHz  
 F2 -200.07 Hz  
 PPMCM 0.45833 ppm/cm  
 HZCM 183.39291 Hz/cm

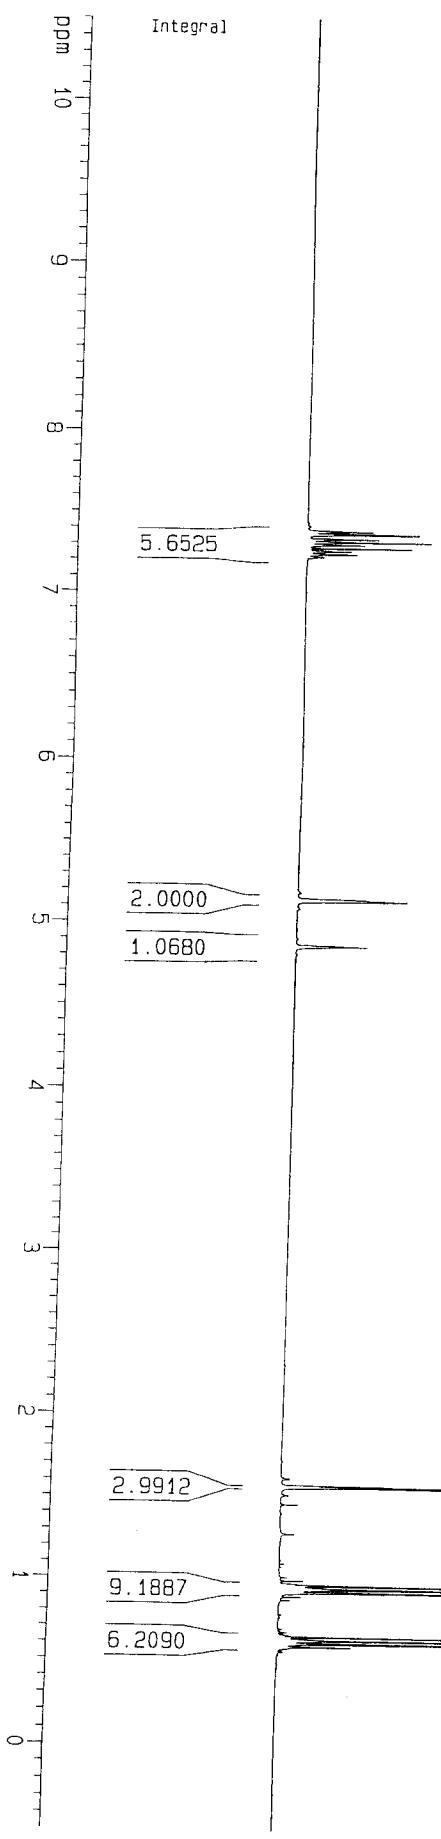

Propene, Apdt

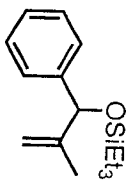

Current Data Parameters  
 NAME ncy8-89-Apdt  
 EXNO 2  
 PRODN 1

F2 - Acquisition Parameters  
 Date\_ 20060112  
 Time 17:18  
 INSTRUM spect  
 PROBHD 5mm BBO BB  
 PULPROG zgpg30  
 TO 65536  
 SOLVENT CDCl3  
 NS 800  
 DS 4  
 SMH 24875.621 Hz  
 FIDRES 0.379972 Hz  
 AQ 1.3173236 sec  
 RG 20.100 usec  
 DE 512  
 TE 300.2 K  
 TC 6.00 usec  
 TD 32768  
 O1 2.0000000 sec  
 O11 0.0300000 sec  
 O12 0.0000000 sec

\*\*\*\*\* CHANNEL f1 \*\*\*\*\*  
 NUC1 13C  
 P1 15.25 usec  
 PL1 3.00 dB  
 SFO1 100.627959 MHz

\*\*\*\*\* CHANNEL f2 \*\*\*\*\*  
 CPDPRG2 MGLCZ16  
 NUC2 1H  
 PPRG2 1H  
 P1 107.30 usec  
 PL2 2.00 dB  
 PL12 24.00 dB  
 PL13 24.00 dB  
 SFO2 400.1316005 MHz

F2 - Processing parameters  
 SI 32768  
 SF 100.612759 MHz  
 NDM EM  
 SSB 0  
 LB 1.00 Hz  
 GB 0  
 PC 1.40

1D NMR dip parameters  
 CX 24.000 cm  
 F1P 230400 ppm  
 F1 22134.60 Hz  
 F2 -10.000 dB  
 F2 -1006.13 Hz  
 PPMICM 9.58333 ppm/cm  
 HZCM 564.20351 Hz/cm

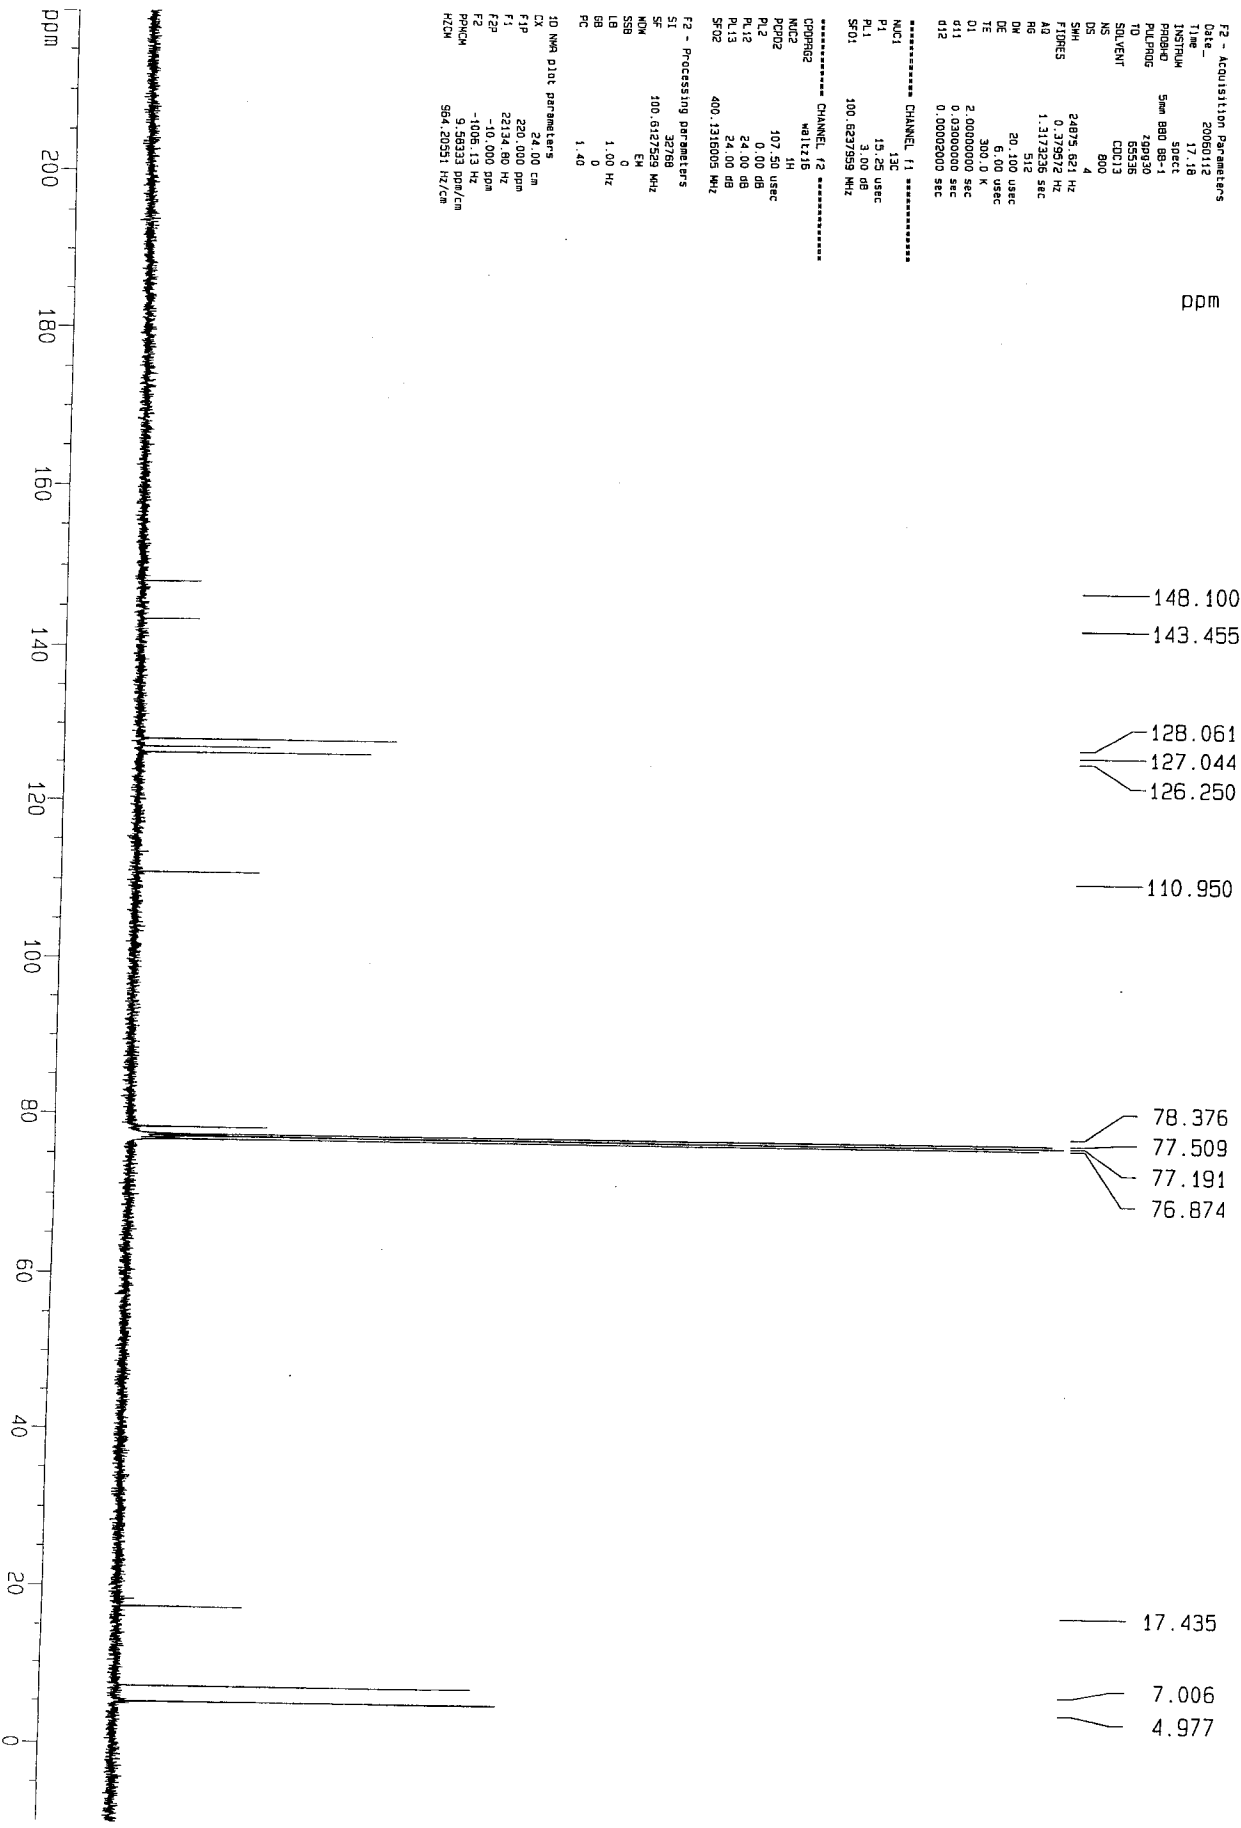

SN050658 ene product

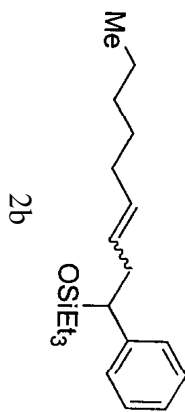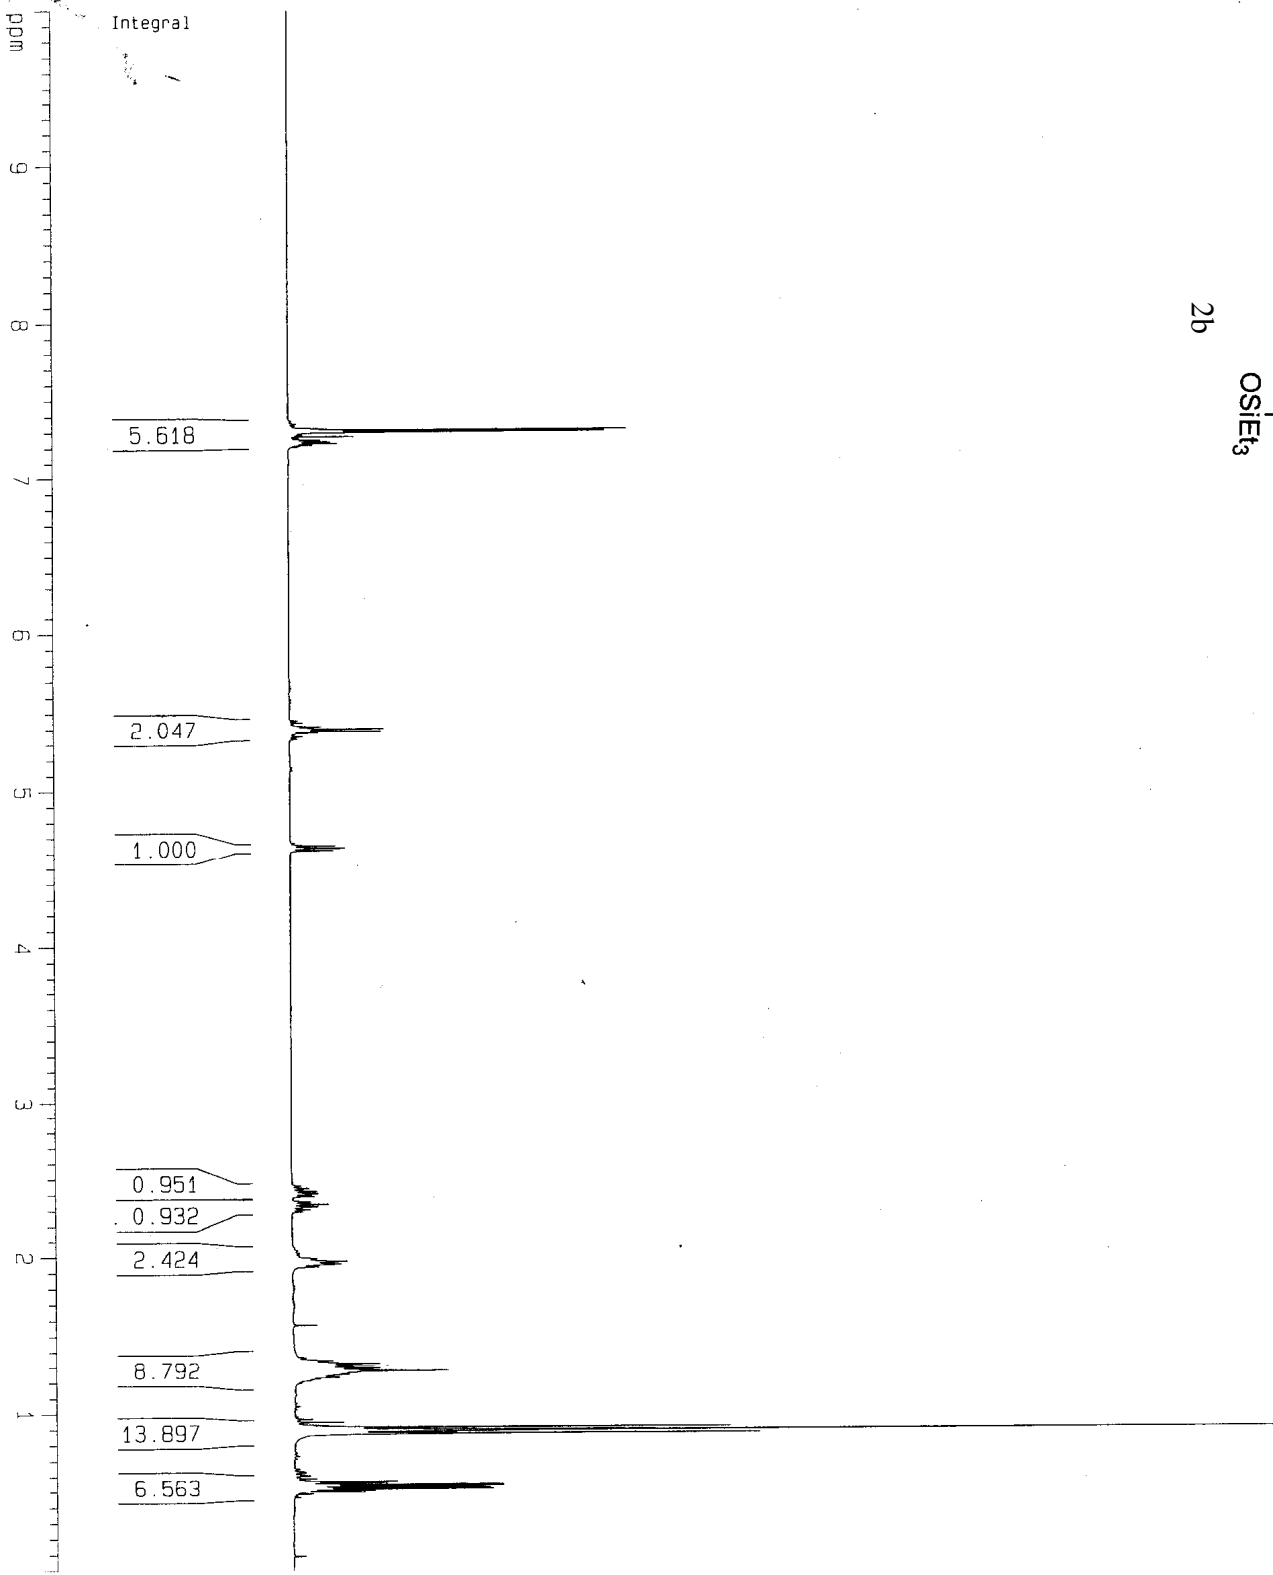

Current Data Parameters  
NAME SNS68ene-H  
EXPNO 1  
PROCNO 1

F2 - Acquisition Parameters  
Date\_ 20050614  
Time 19.59

INSTRUM spect  
PROBHD 5 mm QNP 1H  
PULPROG zg30  
TD 65536  
SOLVENT CDCl3  
NS 8  
DS 4

SWH 8278.146 Hz  
FIDRES 0.126314 Hz  
AQ 3.9584243 sec  
RG 128  
DM 60.400 usec  
DE 5.00 usec  
TE 300.0 K  
D1 1.00000000 sec

===== CHANNEL f1 =====  
NUC1 1H  
P1 9.50 usec  
PL1 2.00 dB  
SF01 400.1324710 MHz

F2 - Processing parameters  
SI 32768  
SF 400.1300559 MHz  
WDW EM  
SSB 0  
LB 0.30 Hz  
GB 0  
PC 1.00

1D NMR plot parameters  
CX 20.00 cm  
F1P 10.000 ppm  
F1 4001.30 Hz  
F2P 0.000 ppm  
F2 0.00 Hz  
PAMCM 0.50000 ppm/cm  
HZCM 200.06500 Hz/cm

octene benzaldehyde TESOTf ene

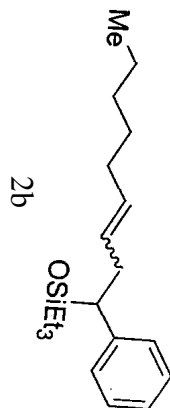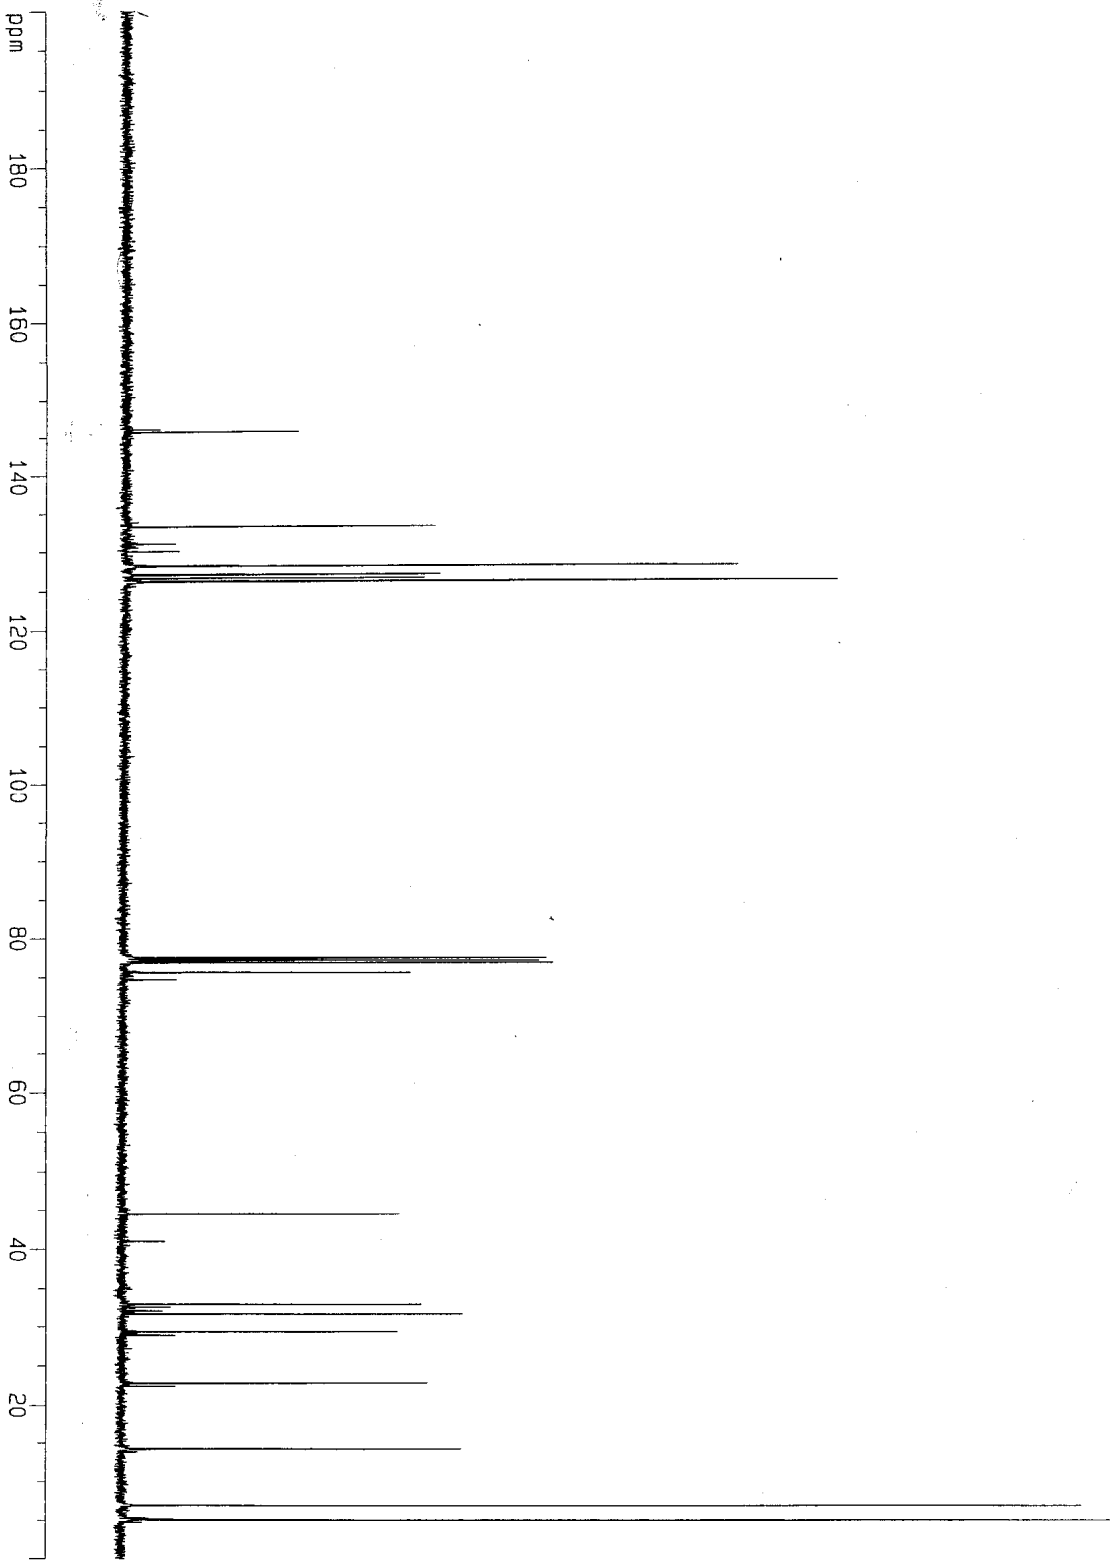

Current Data Parameters  
 NAME octene-ene-C  
 EXPNO 1  
 PROCNO 1

F2 - Acquisition Parameters  
 Date\_ 20050716  
 Time 22.11

INSTRUM spect  
 PROCBHD 5mm BBO BB-1  
 PULPROG zgpg30  
 TD 65536  
 SOLVENT CDCl3  
 NS 213  
 DS 4

SMH 25125.629 HZ  
 FIDRES 0.38387 HZ  
 AQ 1.3042164 sec  
 RG 1149.4  
 DW 19.900 usec  
 DE 6.00 usec  
 TE 300.0 K

D1 2.00000000 sel  
 d11 0.03000000 sel  
 d12 0.00002000 sel

==== CHANNEL f1 =====  
 NUC1 13C  
 P1 15.25 usec  
 PL1 3.00 dB  
 SFO1 100.6237959 MHz

==== CHANNEL f2 =====  
 CPDPRG2 waltz16  
 NUC2 1H  
 PCPD2 107.50 usec  
 PL2 0.00 dB  
 PL12 24.00 dB  
 PL13 24.00 dB  
 SFO2 400.1316005 MHz

F2 - Processing parameters  
 SI 32768  
 SF 100.6127476 MHz  
 WDM EM  
 SSB 0  
 LB 1.00 HZ  
 GB 0  
 PC 1.40

1D NMR plot parameters  
 CX 20.00 cm  
 F1p 200.000 ppm  
 F1 20122.55 HZ  
 F2p 0.000 ppm  
 F2 0.00 HZ

PPMCM 10.00000 ppm/cm  
 HZCM 1006.12744 HZ/cm

SN050658 allylic alcohol

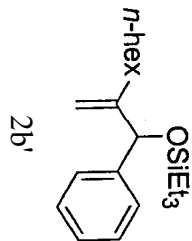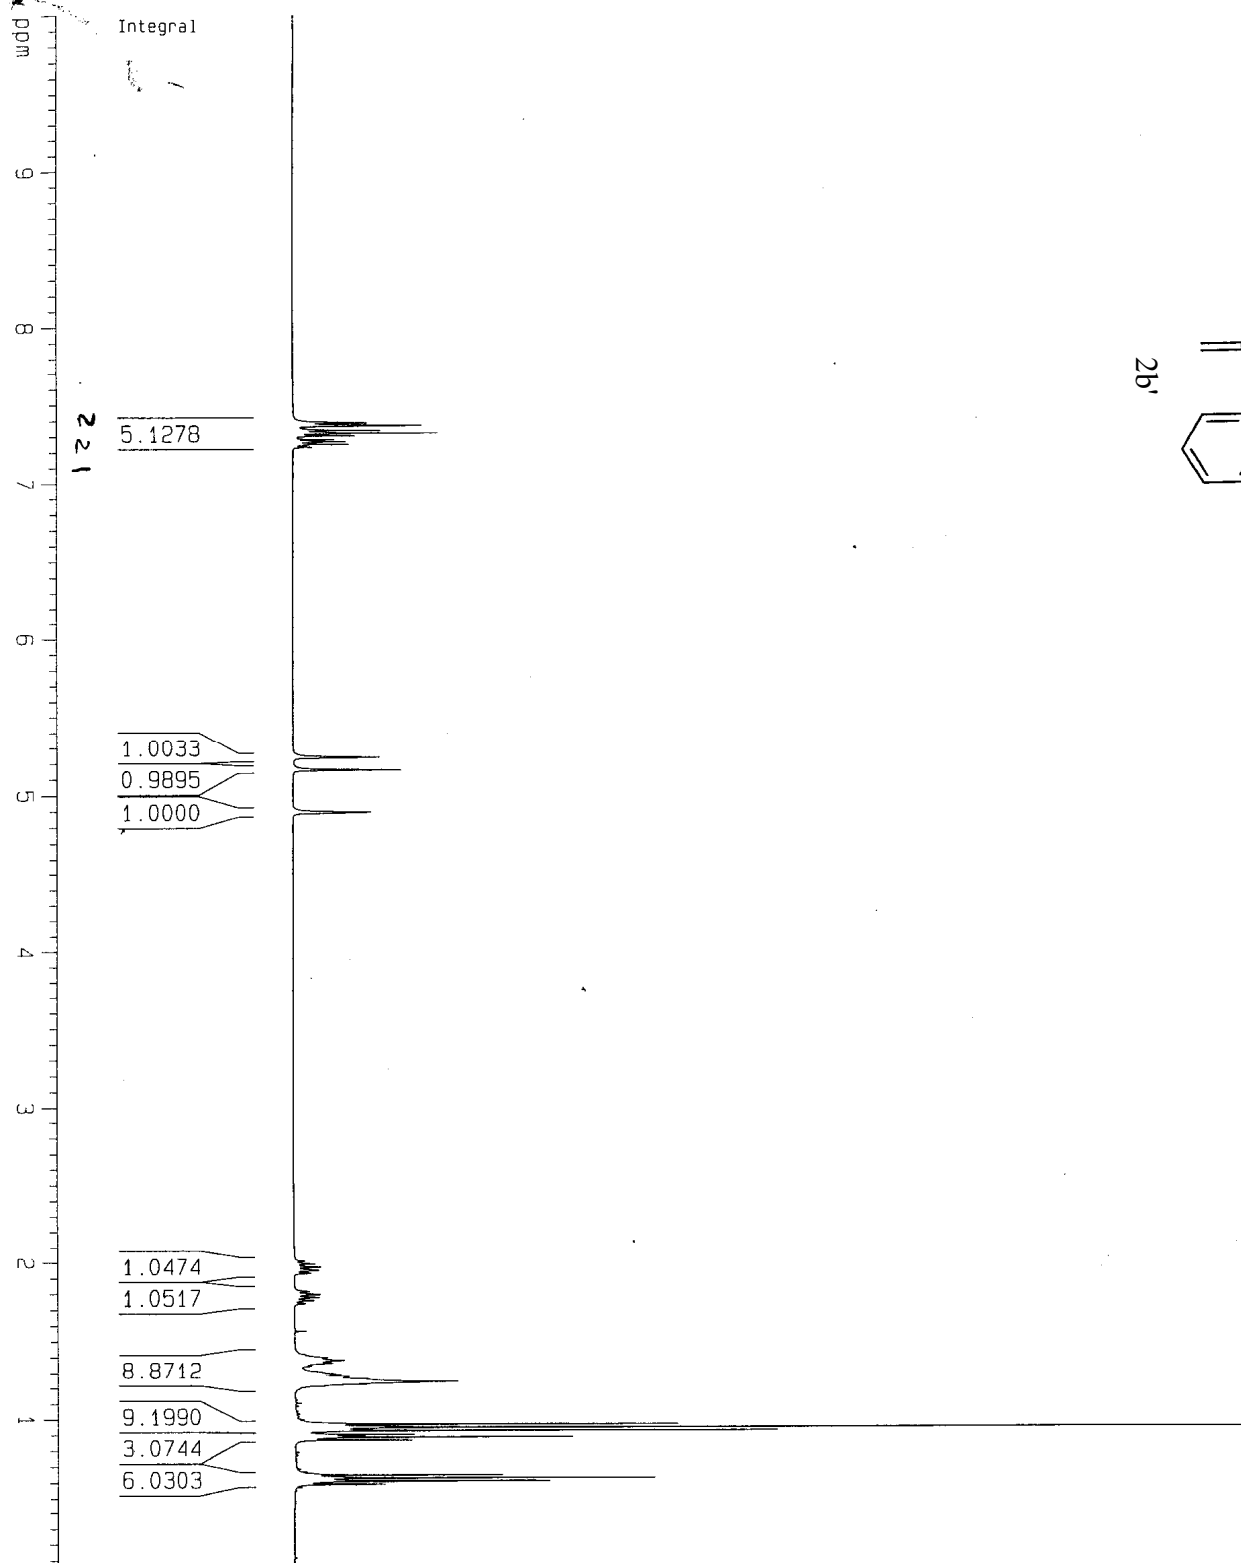

Current Data Parameters  
 NAME SN658neck-c  
 EXPNO 1  
 PROCNO 1

F2 - Acquisition Parameters  
 Date\_ 20050614  
 Time 19.05  
 INSTRUM spect  
 PROBHID 5 mm QNP 1H  
 PULPROG zg30  
 TD 65536  
 SOLVENT CDCl3  
 NS 8  
 DS 4  
 SMH 8278.146 Hz  
 FIDRES 0.126314 Hz  
 AQ 3.9584243 sec  
 RG 64  
 DM 60.400 usec  
 DE 6.00 usec  
 TE 300.0 K  
 D1 1.00000000 sec

===== CHANNEL f1 =====  
 NUC1 1H  
 P1 9.50 usec  
 PL1 2.00 dB  
 SF01 400.1324710 MHz

F2 - Processing parameters  
 SI 32768  
 SF 400.1300000 MHz  
 WDM EM  
 SSB 0  
 LB 0.30 Hz  
 GB 0  
 PC 1.00

1D NMR plot parameters  
 CX 20.00 cm  
 F1P 10.000 ppm  
 F1 4001.30 Hz  
 F2P 0.000 ppm  
 F2 0.00 Hz  
 PPMCM 0.50000 ppm/cm  
 HZCM 200.06500 Hz/cm



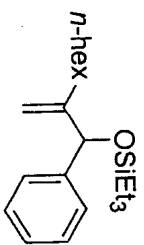

octene benzaldehyde TESOTf

Current Data Parameters  
 NAME octene-a1-C  
 EXPNO 1  
 PROCNO 1

F2 - Acquisition Parameters  
 Date\_ 20050716  
 Time 21.50

INSTRUM Spect  
 PROBHD 5mm BBO B8-1  
 PULPROG zgpg30  
 TD 65536  
 SOLVENT CDCl3  
 NS 95  
 DS 4

SMH 25125.629 Hz  
 FIDRES 0.38387 Hz  
 AQ 1.3042164 sec  
 RG 8192

DW 19.900 usec  
 DE 6.00 usec  
 TE 300.0 K

D1 2.00000000 sec  
 d11 0.03000000 sec  
 d12 0.00020000 sec

===== CHANNEL f1 =====  
 NUC1 13C  
 P1 15.25 usec  
 PL1 3.00 dB  
 SFG1 100.6237959 MHz

===== CHANNEL f2 =====  
 CPDPRG2 waltz16  
 NUC2 1H  
 PCPD2 107.50 usec  
 PL2 0.00 dB  
 PL12 24.00 dB  
 PL13 24.00 dB  
 SF02 400.1316005 MHz

F2 - Processing parameters  
 SI 32768  
 SF 100.6127484 MHz  
 WDW EM  
 SSB 0  
 LB 1.00 Hz  
 GB 0  
 PC 1.40

1D NMR plot parameters

CX 20.00 cm  
 F1p 200.000 ppm  
 F1 20122.55 Hz  
 F2p 0.000 ppm  
 F2 0.00 Hz  
 PPMCM :0.00000 ppm/cm  
 HZCM 1006.12744 Hz/cm

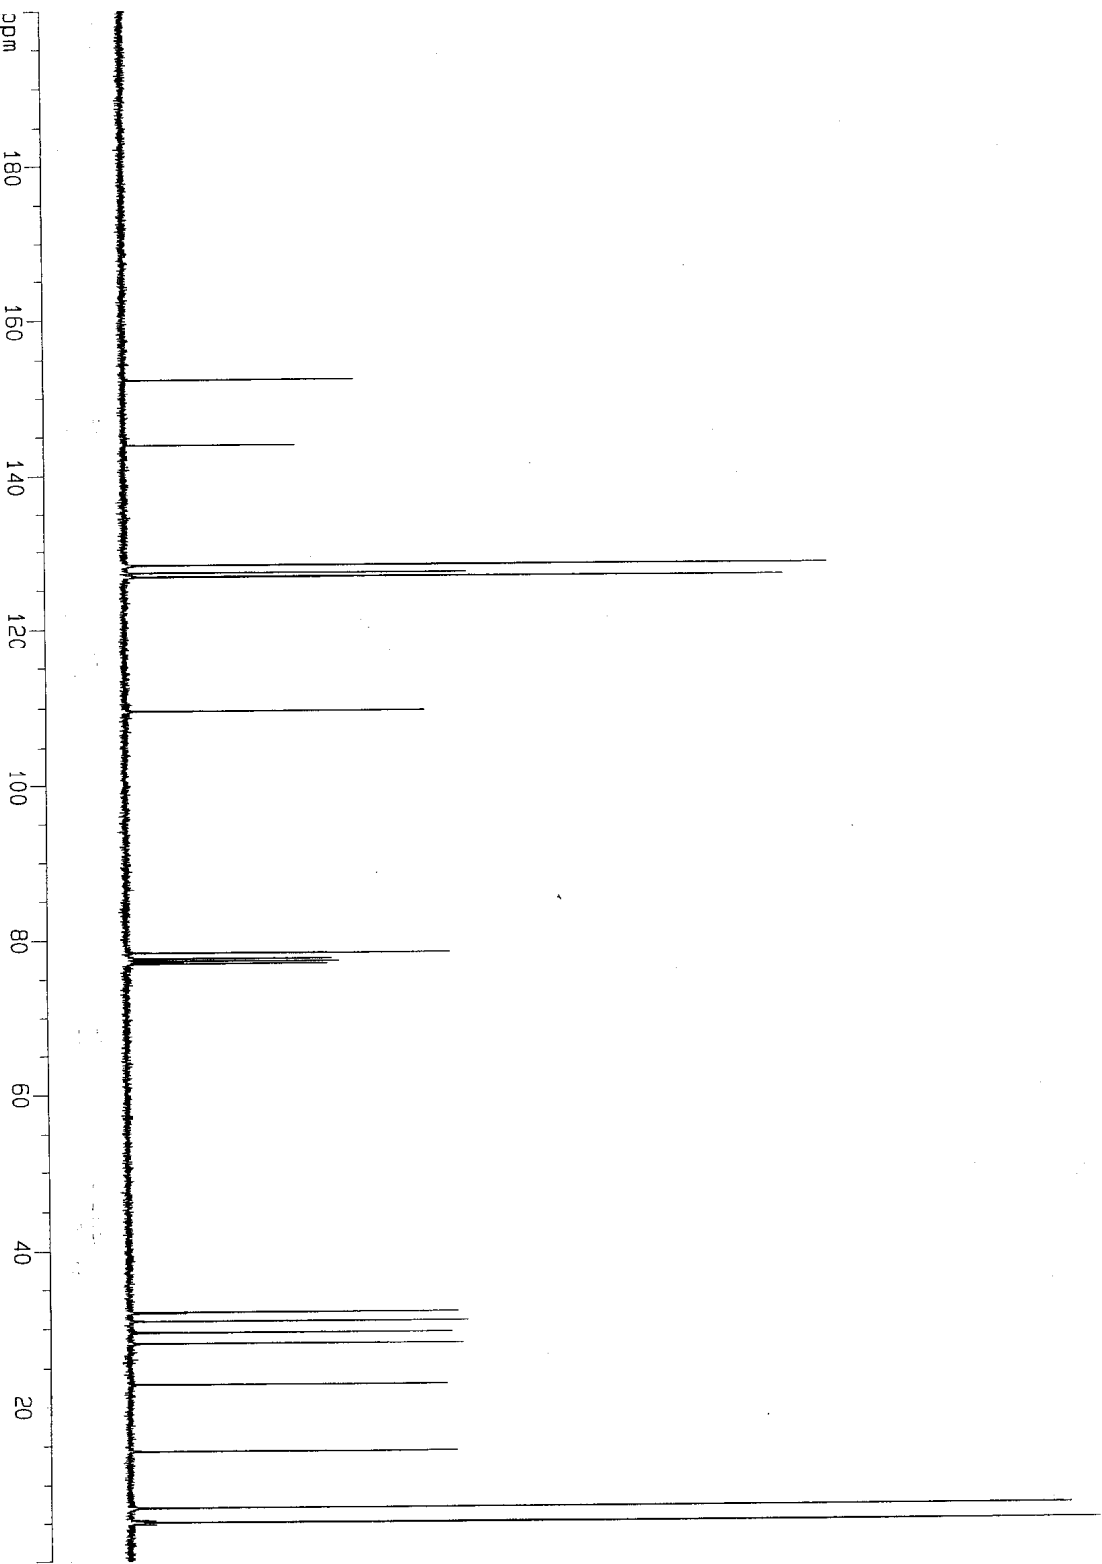

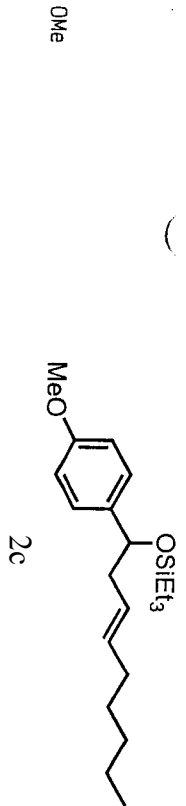

Current Data Parameters  
 NAME hcy-8-44p-Ome  
 EXPNO 1  
 PROCNO 1

F2 - Acquisition Parameters  
 Date\_ 20051028  
 Time 17.30  
 INSTRUM spect  
 PROBHD 5 mm QNP 1H/1  
 PULPROG zg30  
 TD 65536  
 SOLVENT CDCl3  
 NS 4  
 DS 1  
 SMH 8278.146 Hz  
 FIDRES 0.126314 Hz  
 AQ 3.9584243 sec  
 RG 90.5  
 DW 60.400 usec  
 DE 6.00 usec  
 TE 294.8 K  
 D1 1.00000000 sec  
 MCREST 0.00000000 sec  
 MCMRK 0.01500000 sec

===== CHANNEL f1 =====  
 NUC1 1H  
 P1 9.88 usec  
 PL1 3.00 dB  
 SF01 400.1324710 MHz

F2 - Processing parameters  
 SI 32768  
 SF 400.1300054 MHz  
 WDW EM  
 SSB 0  
 LB 0.30 Hz  
 GB 0  
 PC 1.00

1D NMR plot parameters  
 CX 20.00 cm  
 CY 9.19 cm  
 F1P 10.500 ppm  
 F1 4201.37 Hz  
 F2P -0.500 ppm  
 F2 -200.07 Hz  
 PPMCM 0.55000 ppm/cm  
 HZCM 220.07150 Hz/cm

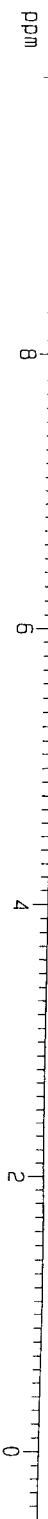

Integral

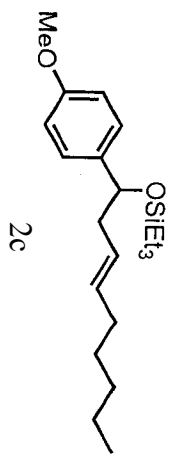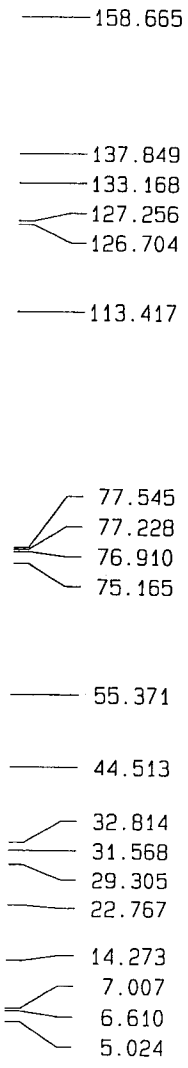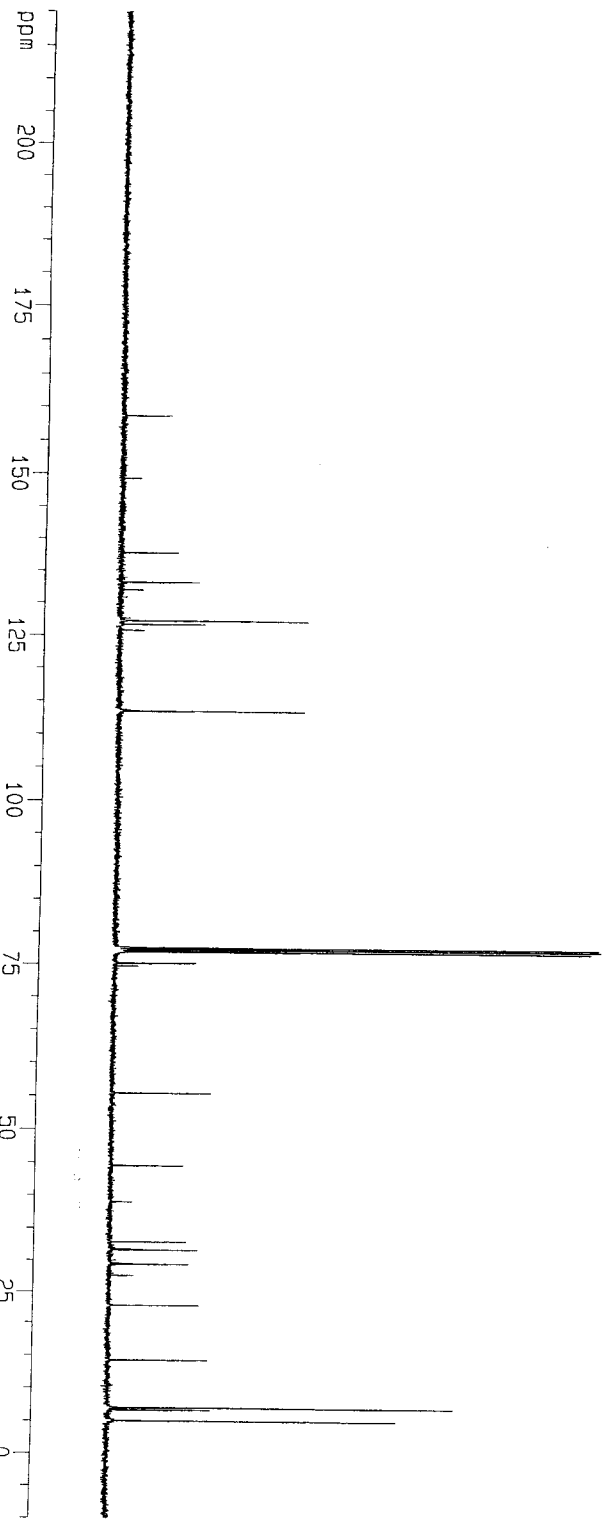

Current Data Parameters  
 NAME hcy-8-44-OMe  
 EXPNO 2  
 PROCNO 1

F2 - Acquisition Parameters  
 Date\_ 20051028  
 Time 16.05  
 INSTRUM spect  
 PROBHD 5mm BBO BB-1  
 PULPROG zgpg30  
 TD 65536  
 SOLVENT CDCl3  
 NS 1024  
 DS 4

SMH 24875.621 HZ  
 FIDRES 0.379572 HZ  
 AQ 1.3173236 sec  
 RG 1024

DM 20.100 usec  
 DE 6.00 usec  
 TE 300.0 K  
 D1 2.00000000 sec  
 d11 0.03000000 sec  
 d12 0.00002000 sec

===== CHANNEL f1 =====  
 NUC1 13C  
 P1 15.25 usec  
 PL1 3.00 dB  
 SF01 100.6237959 MHz

===== CHANNEL f2 =====  
 CPOPRG2 waltz16  
 NUC2 1H  
 PCPD2 107.50 usec  
 PL2 0.00 dB  
 PL12 24.00 dB  
 PL13 24.00 dB  
 SF02 400.1316005 MHz

F2 - Processing parameters  
 SI 32768  
 SF 100.6127499 MHz  
 MDW EM  
 SSB 0  
 LB 1.00 Hz  
 GB 0  
 PC 1.40

10 NMR plot parameters  
 CX 20.00 cm  
 FIP 220.000 ppm  
 F1 22134.80 HZ  
 F2 -1006.13 HZ  
 PPMCM 11.50000 ppm/cm  
 HZCM 1157.04563 HZ/cm

C1

2d

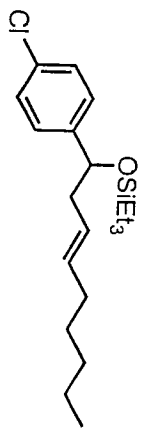

Current Data Parameters  
 NAME hcy-8-44p-C1  
 EXPNO 1  
 PROCNO 1

F2 - Acquisition Parameters  
 Date\_ 20051028  
 Time 17.34  
 INSTRUM spect  
 PROBHD 5 mm QNP 1H/1  
 PULPROG zg30  
 TD 65536  
 SOLVENT CDCl<sub>3</sub>  
 NS 8  
 DS 1  
 SWH 8278.146 Hz  
 FIDRES 0.126314 Hz  
 AQ 3.9584243 sec  
 RG 90.5  
 DW 60.400 usec  
 DE 6.00 usec  
 TE 294.8 K  
 D1 1.00000000 sec  
 MCREST 0.00000000 sec  
 MCMRK 0.01500000 sec

\*\*\*\*\* CHANNEL f1 \*\*\*\*\*  
 NUC1 1H  
 P1 9.88 usec  
 PL1 3.00 dB  
 SF01 400.1324710 MHz

F2 - Processing parameters  
 SI 32768  
 SF 400.1300054 MHz  
 MDW EM  
 SSB 0  
 LB 0.30 Hz  
 GB 0  
 PC 1.00

1D NMR plot parameters  
 CX 20.00 cm  
 CY 9.19 cm  
 F1P 10.500 ppm  
 F1 4201.37 Hz  
 F2P -0.500 ppm  
 F2 -200.07 Hz  
 PPMCM 0.55000 ppm/cm  
 HZCM 220.07150 Hz/cm

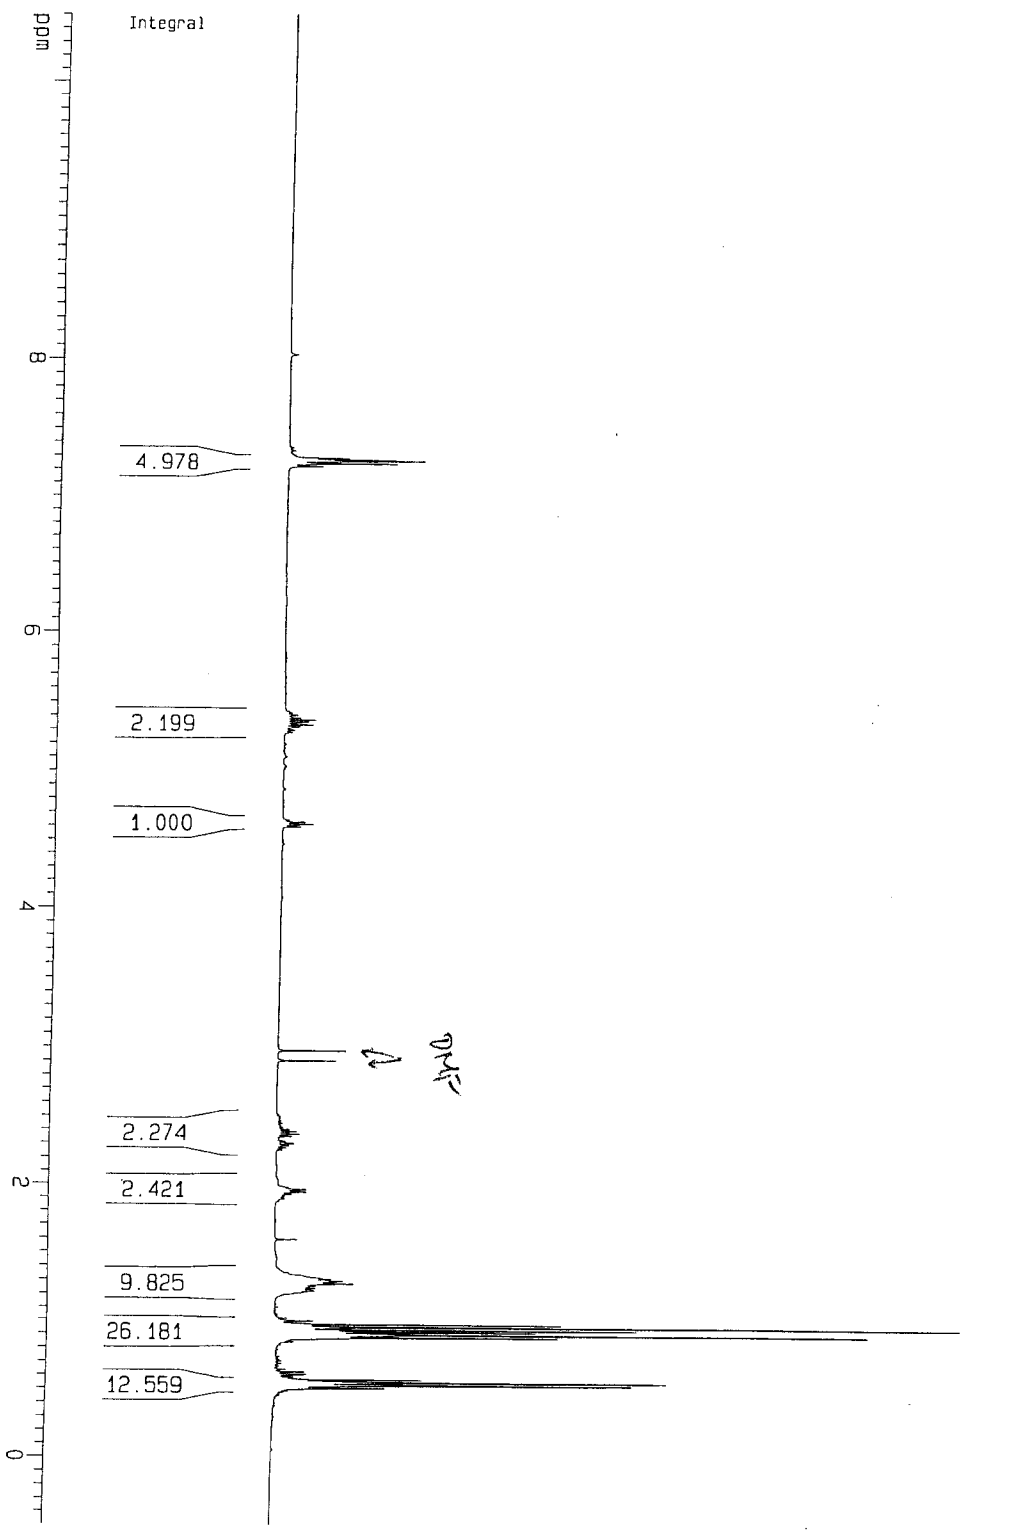

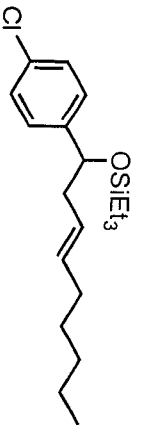

C1

2d

144.082  
133.726  
132.541  
128.240  
127.507  
125.962

77.530  
77.214  
76.896  
74.808

44.370  
32.774  
31.536  
29.248  
22.744  
14.259  
7.010  
6.968  
6.602  
5.104  
4.980

Current Data Parameters  
NAME hcy-8-44-C1  
EXPNO 2  
PROCNO 1

F2 - Acquisition Parameters  
Date\_ 20031028

Time 12.15  
INSTRUM spect  
PROBHD 5 mm QNP 1H/1  
PULPROG zgpg30  
TD 65536  
SOLVENT CDCl3  
NS 800  
DS 4

SWH 2390.814 Hz  
FIDRES 0.365918 Hz  
AQ 1.3664756 sec  
RG 1824.6  
DM 20.850 usec  
DE 6.00 usec  
TE 294.8 K

D1 2.00000000 sec  
DELTA 0.03000000 sec  
DELTA 1.89999998 sec  
MCREST 0.00000000 sec  
MCMRK 0.01500000 sec

CHANNEL f1 \*\*\*\*\*  
NUC1 13C  
P1 8.50 usec  
PL1 3.00 dB  
SF01 100.6282898 MHz

CHANNEL f2 \*\*\*\*\*  
CPDPRG2 waltz16  
NUC2 1H  
PCPD02 88.01 usec  
PL2 3.00 dB  
PL12 22.00 dB  
PL13 22.00 dB  
SF02 400.1316005 MHz

F2 - Processing parameters  
SI 32768  
SF 100.6127505 MHz  
WDW EM  
SSB 0  
LB 1.00 Hz  
GB 0  
PC 1.40

1D NMR plot parameters  
CX 20.00 cm  
CY 12.50 cm  
F1P 219.353 ppm  
F1 22069.67 Hz  
F2P -18.995 ppm  
F2 -1911.15 Hz  
PPMCM 11.91738 ppm/cm  
HZCM 1199.04077 Hz/cm

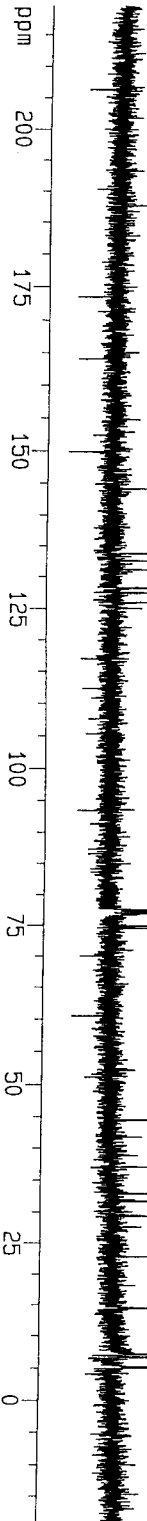

NCH-8-87P. 35c

Current Data Parameters  
NAME hcy-87n-p  
EXNO 11  
PROCNO 1

F2 - Acquisition Parameters  
Date 2006109  
Time 17.29  
INSTRUM spect  
PROBHD 5mm BBO BB-1  
PULPROG zgpg30  
TD 65536  
SOLVENT CDCl3  
DS 2  
OS 3  
SHH 9278.146 Hz  
FIDRES 0.126314 Hz  
AQ 3.568443 sec  
RG 25.4  
DM 60.400 usec  
DE 6.00 usec  
TE 300.0 K  
D1 1.00000000 sec

\*\*\*\*\* CHANNEL f1 \*\*\*\*\*  
NUC1 1H  
P1 7.90 usec  
R1 0.00 dB  
SFO1 400.1362710 MHz

F2 - Processing parameters  
SI 32768  
SF 400.1300016 MHz  
WDW EM  
SSB 0  
LB 0.30 Hz  
GB 0  
PC 1.00

D0 NMR plot parameters  
F1 24.00 cm  
F2 10.500 ppm  
F3 40.57 Hz  
F4 0.50 ppm  
F5 -200.07 Hz  
PRNCK 0.46933 ppm/cm  
HZCK 183.38281 Hz/cm

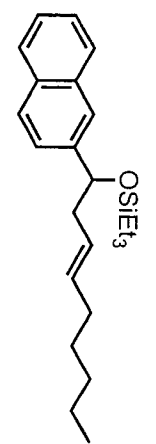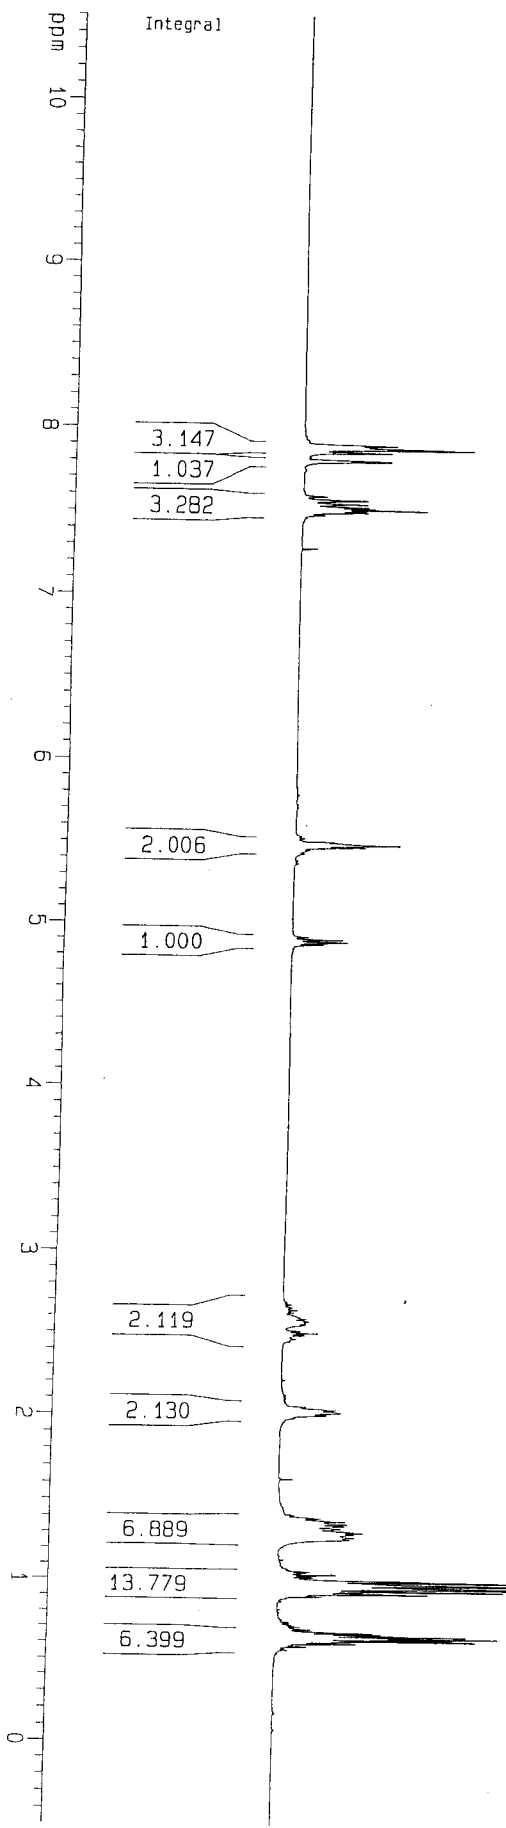

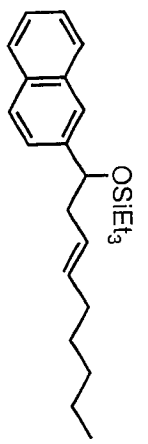

2e

ppm

- 143.093
- 143.011
- 133.441
- 133.402
- 133.003
- 132.279
- 128.114
- 127.913
- 127.865
- 126.494
- 126.009
- 125.991
- 125.617
- 125.592
- 125.514
- 124.730
- 124.688
- 124.675
- 124.616
  
- 77.550
- 77.232
- 76.915
- 75.705
- 75.299
  
- 44.437
- 38.915
- 32.830
- 31.718
- 31.565
- 29.462
- 29.307
- 27.606
- 22.762
- 14.259
- 7.080
- 7.040
- 5.189
- 5.073

```

Current Data Parameters
NAME      ncp4-87n1-p
EXPNO    22
PROCNO   1
-----
F2 - Acquisition Parameters
Date_    20060109
Time     17.45
INSTRUM  spect
PROBHD   5mm BBO BB-1
PULPROG  zgpg30
TD        65536
SOLVENT  CDCl3
NS        2048
DS        4
SWH       24875.821 Hz
FIDRES    0.379572 Hz
AQ        1.3173286 sec
RG         1024
DM        20.100 usec
DE        6.00 usec
TE        300.0 K
D1        2.00000000 sec
d11       0.03000000 sec
d12       0.00002000 sec
-----
CHANNEL F1 *****
NUC1      13C
P1        15.25 usec
PL1       3.00 dB
SFO1     100.627959 MHz
-----
CHANNEL F2 *****
CPDPRG2  waltz16
NUC2      1H
P2        107.50 usec
PL2       0.00 dB
PL12      24.00 dB
PL13      24.00 dB
SFO2     400.136005 MHz
-----
F2 - Processing parameters
SI        32768
SF        100.6127544 MHz
WDW       EM
SSB       0
LB        1.00 Hz
GB        0
PC        1.40
-----
1D NMR Plot Parameters
CX        24.00 cm
F1P       220.000 ppm
F1        220.000 MHz
F2P       -10.000 ppm
F2        -1006.13 Hz
PPHCK     9.98333 ppm/cm
HZCM      964.20251 Hz/cm
  
```

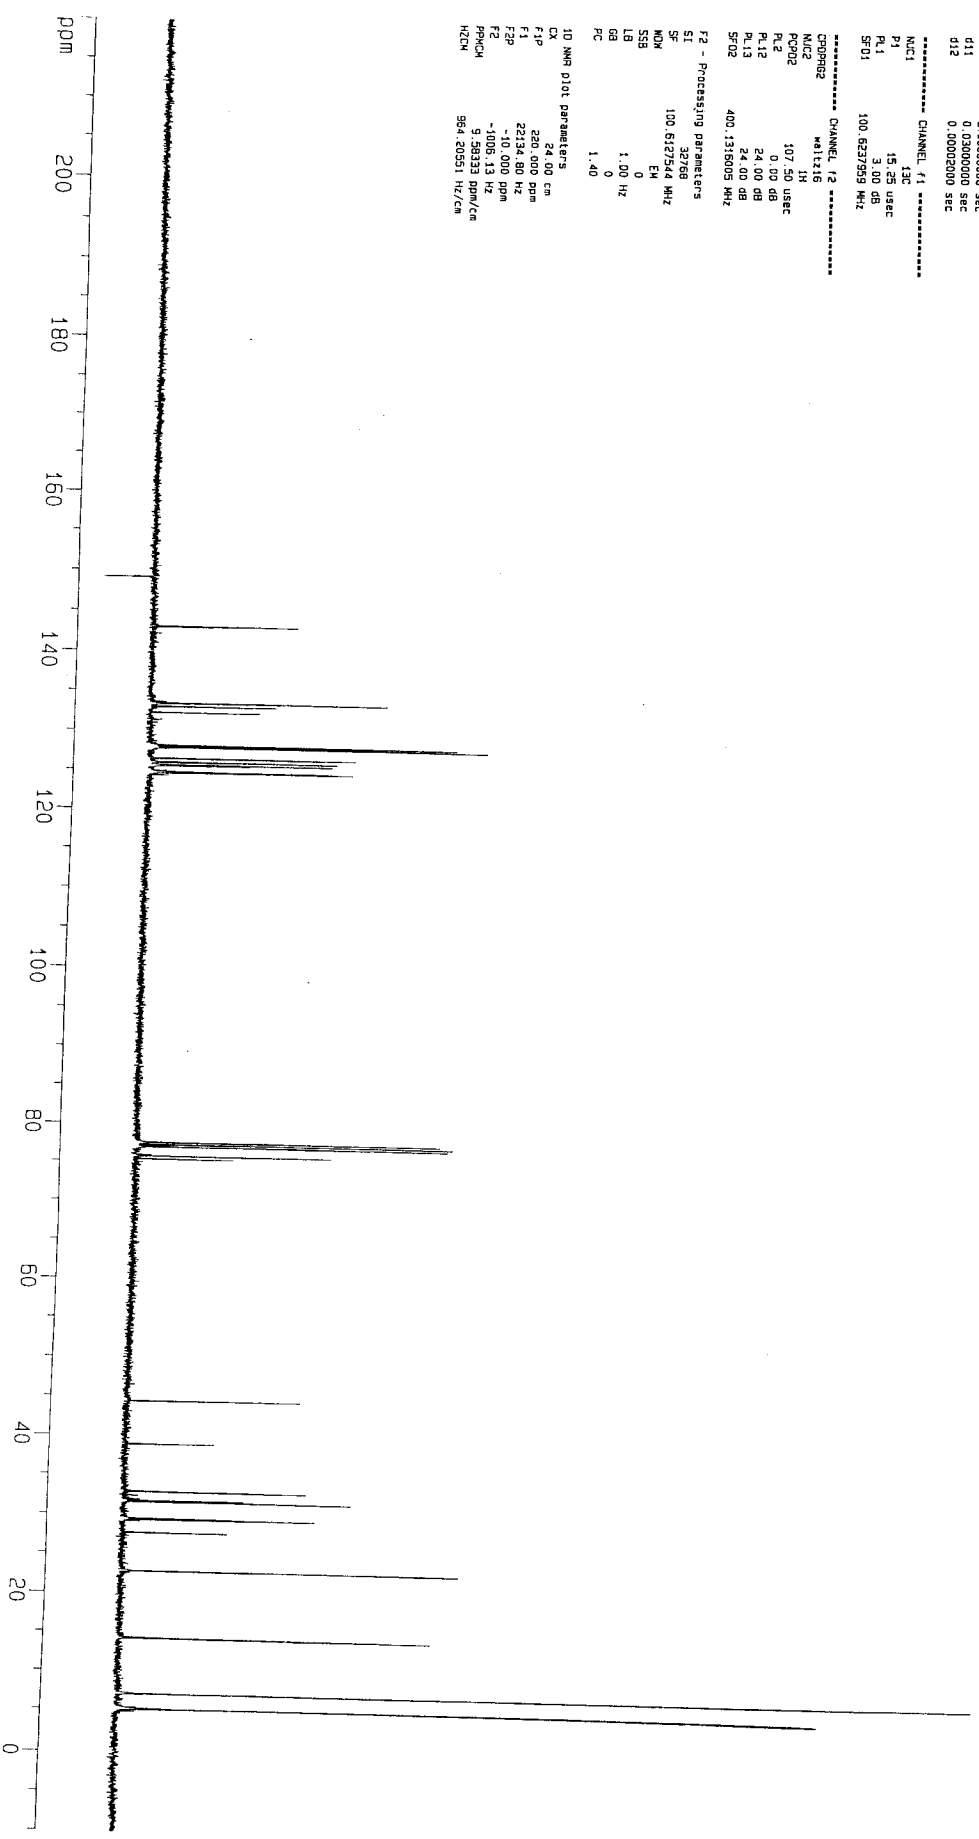

Me-indole-2-CHO, f1

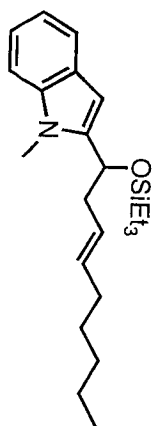

2f

Current Data Parameters  
 NAME hcy-8-52-ind-2  
 EXPNO 1  
 PROCNO 1

F2 - Acquisition Parameters  
 Date\_ 20051110  
 Time 12.10

INSTRUM spect  
 PROBHD 5mm BBO BB-1  
 PULPROG zg30  
 TD 65536  
 SOLVENT CDCl3

NS 8  
 DS 2  
 SWH 8278.146 Hz  
 FIDRES 0.126314 Hz  
 AQ 3.9584243 sec  
 RG 18

DW 60.400 usec  
 DE 6.00 usec  
 TE 300.0 K  
 D1 1.00000000 sec

==== CHANNEL f1 =====  
 NUC1 1H  
 P1 7.90 usec  
 PL1 0.00 dB  
 SF01 400.1324710 MHz

F2 - Processing parameters  
 SI 32768  
 SF 400.1300016 MHz  
 WDW EM  
 SSB 0  
 LB 0.30 Hz  
 GB 0  
 PC 1.00

1D NMR plot parameters  
 CX 20.00 cm  
 F1P 10.500 ppm  
 F1 4201.37 Hz  
 F2P -0.500 ppm  
 F2 -200.07 Hz  
 PPMCM 0.55000 ppm/cm  
 HZCM 220.07150 Hz/cm

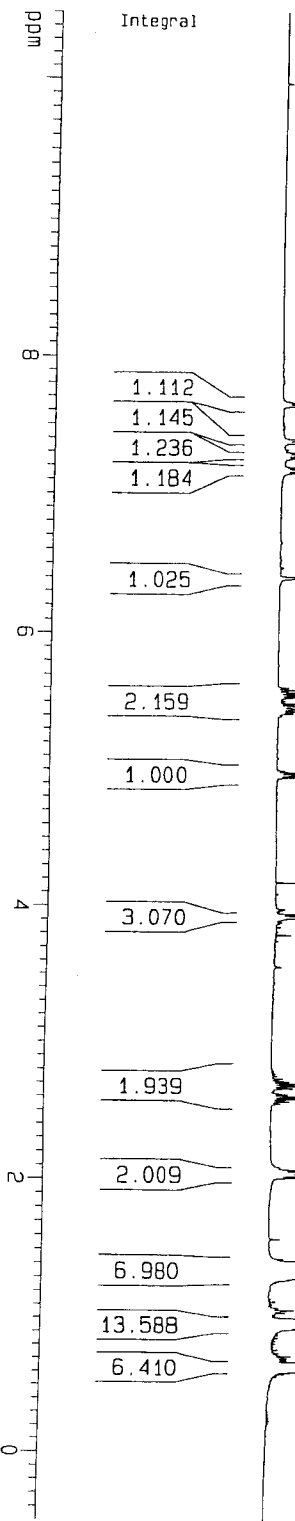



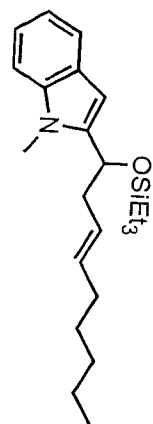

2f

- 142.280
- 138.383
- 133.691
- 127.670
- 126.236
- 121.293
- 120.677
- 119.432
- 109.071
- 100.181
- 77.587
- 77.269
- 76.952
- 70.584
- 42.188
- 32.818
- 31.611
- 31.038
- 29.295
- 22.784
- 14.296
- 6.999
- 5.029

ppm

ppm 200 175 150 125 100 75 50 25 0

Current Data Parameters  
 NAME hcy-8-52-ind-2  
 EXPNO 2  
 PROCNO 1

F2 - Acquisition Parameters

Date\_ 20051110  
 Time 12.17  
 INSTRUM spect  
 PROBRD 5mm BBO BB-1  
 PULPROG zgpg30  
 TD 65536  
 SOLVENT CDCl3  
 NS 434  
 DS 4  
 SMH 24875.621 Hz  
 FIDRES 0.379572 Hz  
 AQ 1.3173236 sec  
 RG 1024  
 DW 20.100 usec  
 DE 6.00 usec  
 TE 300.0 K  
 D1 2.00000000 sec  
 d11 0.03000000 sec  
 d12 0.00002000 sec

===== CHANNEL f1 =====

NUC1 13C  
 P1 15.25 usec  
 PL1 3.00 dB  
 SF01 100.6237959 MHz

===== CHANNEL f2 =====

CPDPRG2 wa1tz16  
 NUC2 1H  
 PCPD2 107.50 usec  
 PL2 0.00 dB  
 PL12 24.00 dB  
 PL13 24.00 dB  
 SF02 400.1316005 MHz

F2 - Processing Parameters

SI 32768  
 SF 100.6127529 MHz  
 MDW EM  
 SSB 0  
 LB 1.00 Hz  
 GB 0  
 PC 1.40

1D NMR plot parameters

CX 20.00 cm  
 F1P 220.000 DPM  
 F1 22134.80 Hz  
 F2P -10.000 DPM  
 F2 -1006.13 Hz  
 PPMCM 11.50000 ppm/cm  
 HZCM 1157.04663 Hz/cm

124-8-95 - H-pdt.

H-pdt

2g

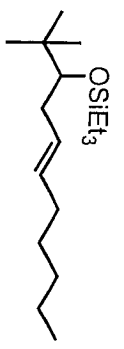

Current Data Parameters  
 Name: 124-8-95  
 EXPNO: 1  
 PROCNO: 1

F2 - Acquisition Parameters  
 Date\_: 20060120  
 Time: 12.41  
 INSTRUM: spect  
 PROBNM: 5mm BB0-BB-1  
 PULPROG: zg30  
 TD: 65536  
 SOLVENT: CDCl3  
 NS: 4  
 DS: 2  
 SWH: 8278.146 Hz  
 FIDRES: 0.28214 Hz  
 AQ: 3.582429 sec  
 RG: 60.400 usec  
 DE: 6.00 usec  
 TE: 300.0 K  
 D1: 1.00000000 sec

\*\*\*\*\* CHANNEL f1 \*\*\*\*\*  
 NUC1: 1H  
 P1: 7.50 usec  
 PL1: 0.00 dB  
 SFO1: 400.1324710 MHz

F2 - Processing parameters  
 SI: 32768  
 SF: 400.1300000 MHz  
 MDW: 0  
 SSB: 0  
 LB: 0.30 Hz  
 GB: 0  
 PC: 1.00

1D NMR plot parameters  
 CX: 24.00 cm  
 F1P: 10.500 ppm  
 F1: 4201.36 Hz  
 F2P: -0.500 ppm  
 F2: -200.07 Hz  
 PRNUC1: 0.45593 ppm/cm  
 HZCM: 183.32531 Hz/cm

Integral

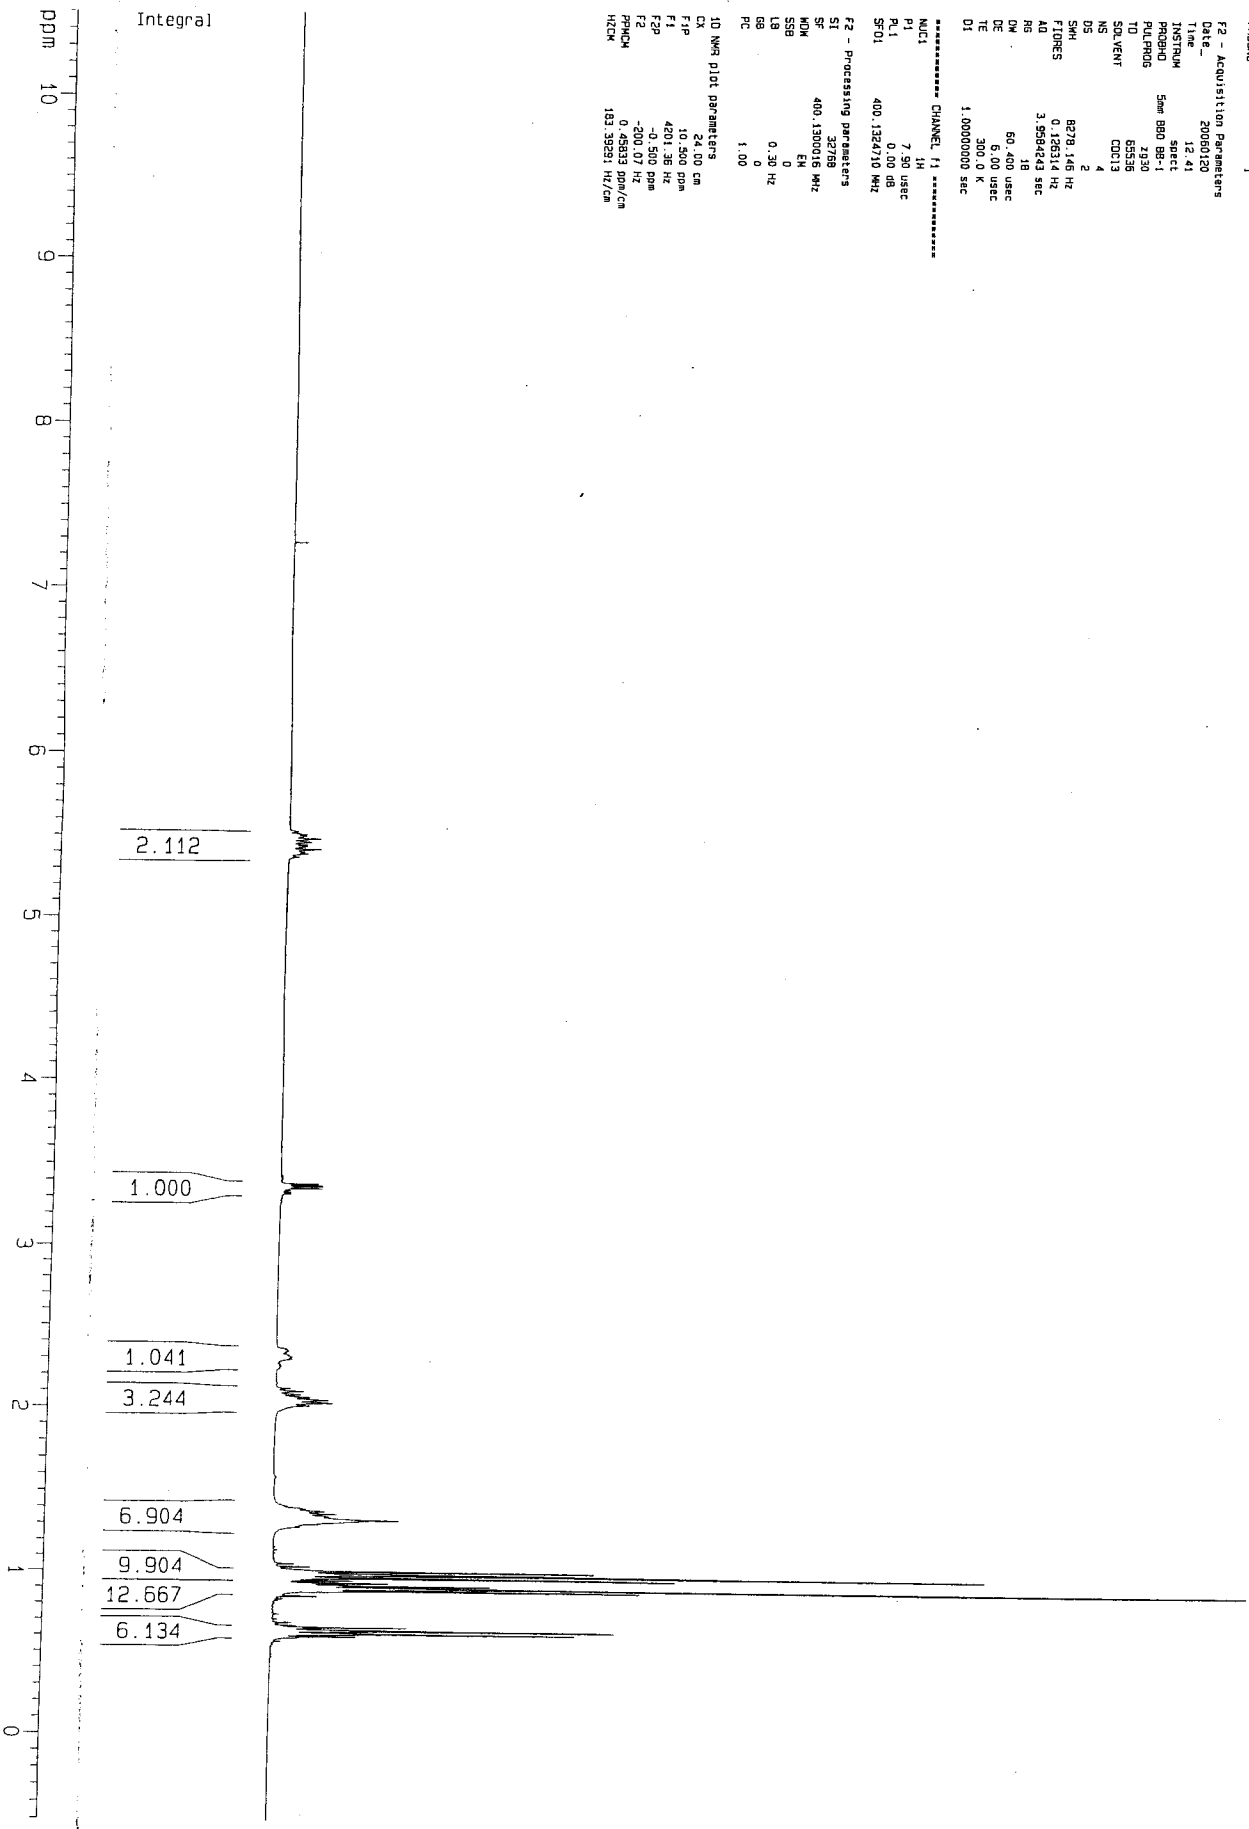

H-pdt

2g

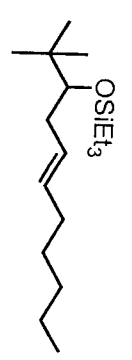

Current Data Parameters  
 NAME hcy8-shgcat  
 EXPNO 2  
 PROCNO 1

F2 - Acquisition Parameters  
 Date\_ 20060120  
 Time 12.55  
 INSTRUM spect  
 PROBHD 5mm BBO BB-1  
 PULPROG zgpg30  
 SOLVENT CDCl<sub>3</sub>  
 NS 239  
 DS 4

SIHF 24875.624 Hz  
 FIDRES 0.372652 Hz  
 AQ 1.3172265 sec  
 RG 1143.4  
 DM 20.100 usec  
 DE 6.00 usec  
 TE 300.0 K  
 D1 2.00000000 sec  
 d11 0.03000000 sec  
 d12 0.00002000 sec

\*\*\*\*\* CHANNEL f1 \*\*\*\*\*  
 NUCL1 13C  
 P1 13.63 usec  
 PL 1.40 dB  
 SFO1 100.6237529 MHz

\*\*\*\*\* CHANNEL f2 \*\*\*\*\*  
 CPDPRG2 waltz16  
 NUCL2 1H  
 PCPD2 107.50 usec  
 PL2 0.00 dB  
 PL12 24.00 dB  
 PL13 24.00 dB  
 SF02 400.1316005 MHz

F2 - Processing parameters  
 SI 32788  
 SF 100.6127529 MHz  
 KW 24  
 SSB 0  
 LB 1.00 Hz  
 GB 0  
 PC 1.40

1D NMR plot parameters  
 CX 24.00 cm  
 F1P 220.000 ppm  
 F2P 23134.80 Hz  
 F2 -10.000 ppm  
 F2 -1008.13 Hz  
 FPCW 3.58533 ppm/cm  
 NZCW 964.2831 Hz/cm

- 130.612
- 128.506
- 81.205
- 77.479
- 77.161
- 76.844
- 36.155
- 31.793
- 31.355
- 29.463
- 27.601
- 26.480
- 22.775
- 14.241
- 7.293
- 5.693
- 5.671

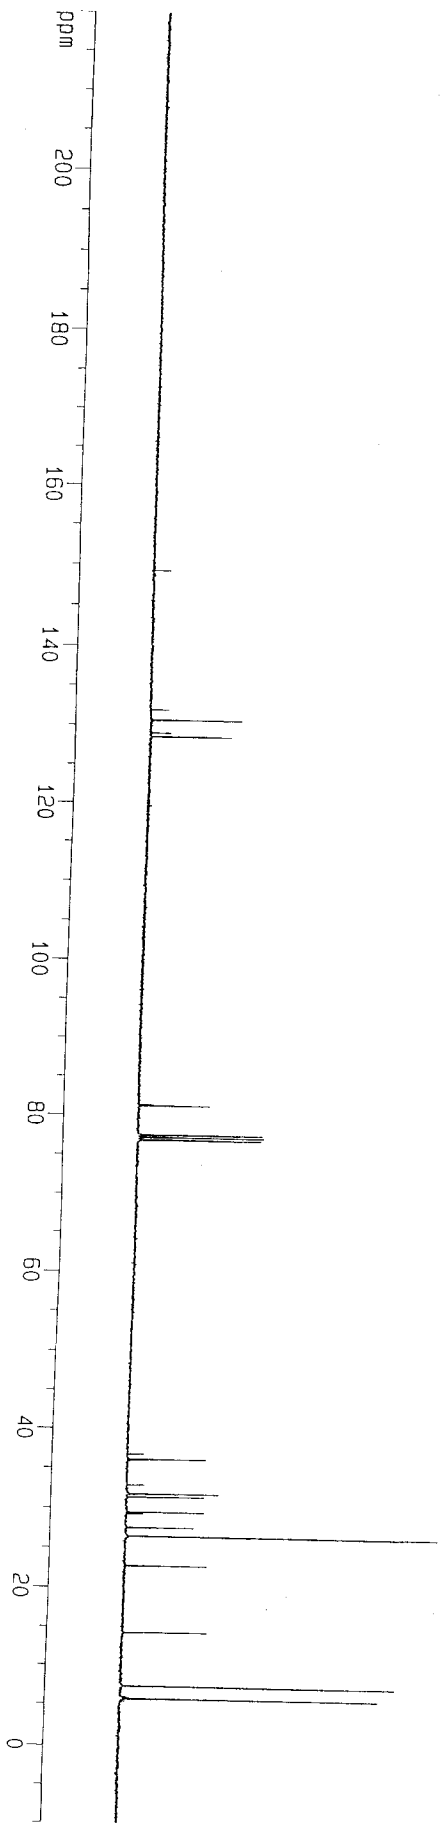

H-pdt

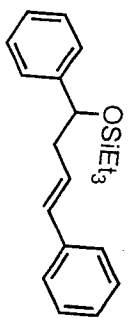

Current Data Parameters  
NAME a11yicmtr01/3  
EXNO 1  
PROCNO 1

F2 - Acquisition Parameters  
Date\_ 20080206  
Time 18:07  
INSTRUM spect  
PROBHD 5 mm QNP 1H/1  
PULPROG zgpg30  
TD 65536  
SOLVENT CDCl3  
NS 5  
DS 1  
SWH 8278.146 Hz  
FIDRES 0.126314 Hz  
AQ 3.5964243 sec  
RG 35.9  
DM 60.400 usec  
DE 6.00 usec  
TE 294.2 K  
NUC1 13C  
MAGNET 100.626150 MHz  
KORRKT 0.0150000 sec

\*\*\*\*\* CHANNEL f1 \*\*\*\*\*  
NUC1 1H  
P1 9.88 usec  
PL1 3.00 dB  
SFO1 400.1324710 MHz

F2 - Processing parameters  
SI 32768  
SF 400.1300054 MHz  
WDW EM  
SSB 0  
GB 0.30 Hz  
PC 1.00

1D NMR D101 parameters  
CX 24.00 cm  
CY 9.71 cm  
F1JP 10.500 ppm  
F1 4201.36 Hz  
F2P -0.500 ppm  
F2 -200.07 Hz  
PPhOH 0.45833 ppm/cm  
HZOH 183.35824 Hz/cm

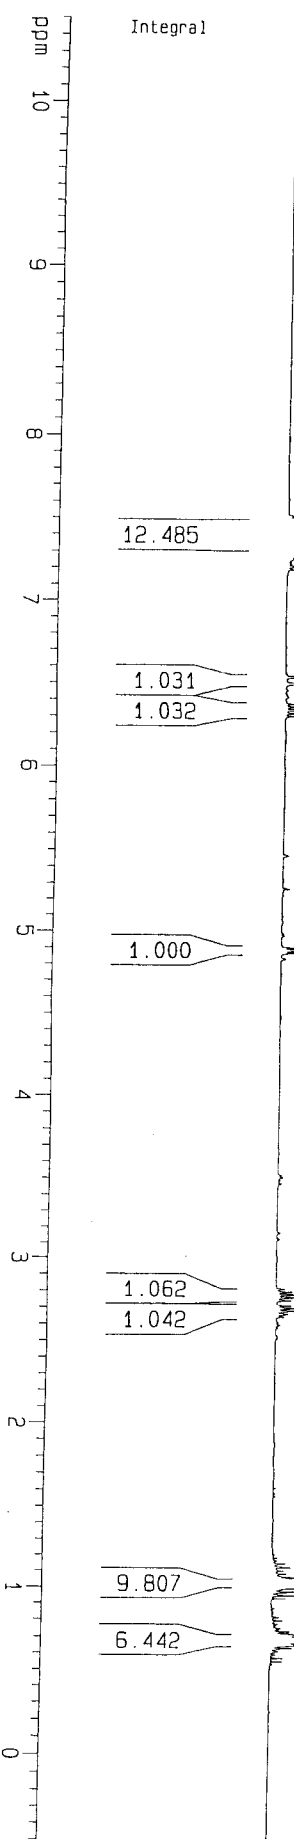

Current Data Parameters  
 NAME 01111control13  
 EXPNO 2  
 PROCNO 1

F2 - Acquisition Parameters  
 Date\_ 20060205  
 Time 16.10  
 INSTRUM spect  
 PROBRG 5 aa dnp h/1  
 PULPROG zgpg30  
 DO 10  
 SOLVENT CDCl3  
 NS 63  
 DS 2  
 SMH 2390.814 Hz  
 FIDRES 0.366918 Hz  
 AQ 1.3664726 sec  
 RG 1625.5  
 DW 20.650 usec  
 DE 6.00 usec  
 TE 294.8 K  
 D1 2.0000000 sec  
 d11 0.0300000 sec  
 DELTA 1.8895998 sec  
 WDEXT 1.0000000 sec  
 HXPRGK 0.0150000 sec

\*\*\*\*\* CHANNEL f1 \*\*\*\*\*  
 NUC1 13C  
 P1 8.50 usec  
 PL1 3.00 dB  
 SFO1 100.6282628 MHz

\*\*\*\*\* CHANNEL f2 \*\*\*\*\*  
 CPDPRG2 waltz16  
 NUCE 1H  
 P2 89.01 usec  
 PL2 2.00 dB  
 PL12 22.00 dB  
 PL13 22.00 dB  
 SFO2 400.1315005 MHz

F2 - Processing parameters  
 SI 32768  
 SF 100.6127505 MHz  
 MDW EM  
 SSB 0  
 LB 1.00 Hz  
 GB 0  
 PC 1.40

1D NMR plot parameters  
 CX 24.00 cm  
 CY 2.29 cm  
 FIP 219.353 ppm  
 F1 22068.67 Hz  
 F2P -18.995 ppm  
 F2 -1911.15 Hz  
 PPRCKA 9.93115 ppm/cm  
 HZCK 999.20062 Hz/cm

- 145.469
- 138.043
- 132.395
- 128.764
- 128.384
- 127.398
- 127.348
- 127.242
- 126.322
- 126.189
  
- 77.687
- 77.369
- 77.052
- 75.459
  
- 45.019
  
- 7.124
- 5.175
- 5.125

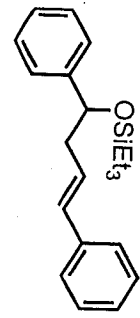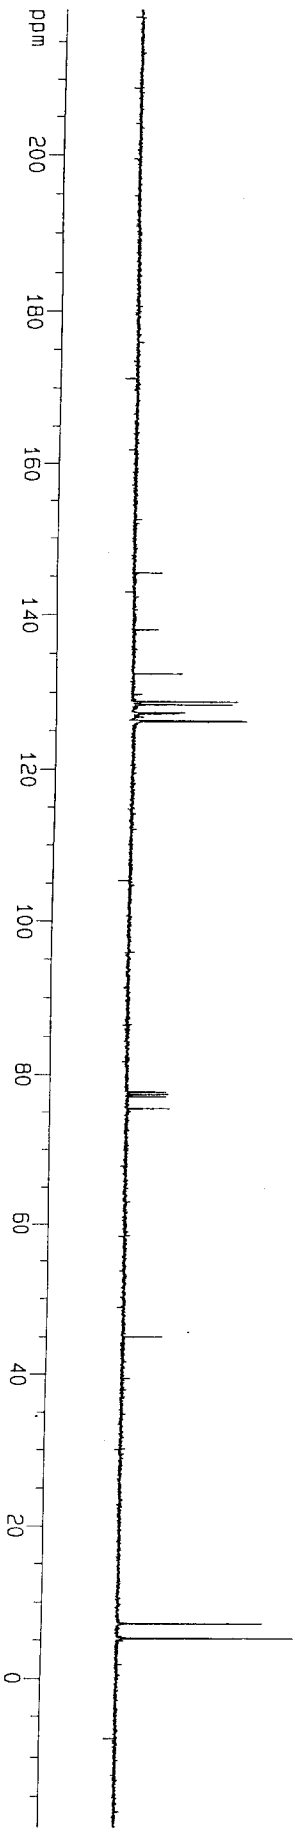

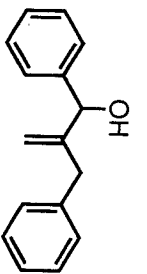

2h<sup>1</sup> (TES group deprotected)

TES deprotection, Apdt

Current Data Parameters  
 NAME hc9d-320mde-4p  
 EXPNO 1  
 PROCNO 1

F2 - Acquisition Parameters  
 Date\_ 20060209  
 Time 13:04  
 INSTRUM spect  
 PROBD 5mm BBO BB-1  
 PULPROG zgpg30  
 SO 2930  
 NO 65395  
 DS 2  
 SWH 8278.146 Hz  
 FIDRES 0.126314 Hz  
 AQ 3.994243 sec  
 RG 574.7  
 DM 50.400 usec  
 DE 6.00 usec  
 TE 300.0 K  
 D1 1.00000000 sec

\*\*\*\*\* CHANNEL f1 \*\*\*\*\*  
 NUC1 <sup>1</sup>H  
 P1 7.50 usec  
 PL 0.10 dB  
 SF01 400.1324710 MHz

F2 - Processing parameters  
 SI 32768  
 SF 400.1300016 MHz  
 KDN 0  
 SSB 0  
 LB 0.30 Hz  
 GB 0  
 PC 1.00

1D NMR plot parameters  
 CA 24.00 cm  
 F1 130.000 DPM  
 F2 420.500 Hz  
 F3P 420.500 Hz  
 F2 -200.07 Hz  
 PPHW 0.46833 ppm/cm  
 HZCM 183.39291 Hz/cm

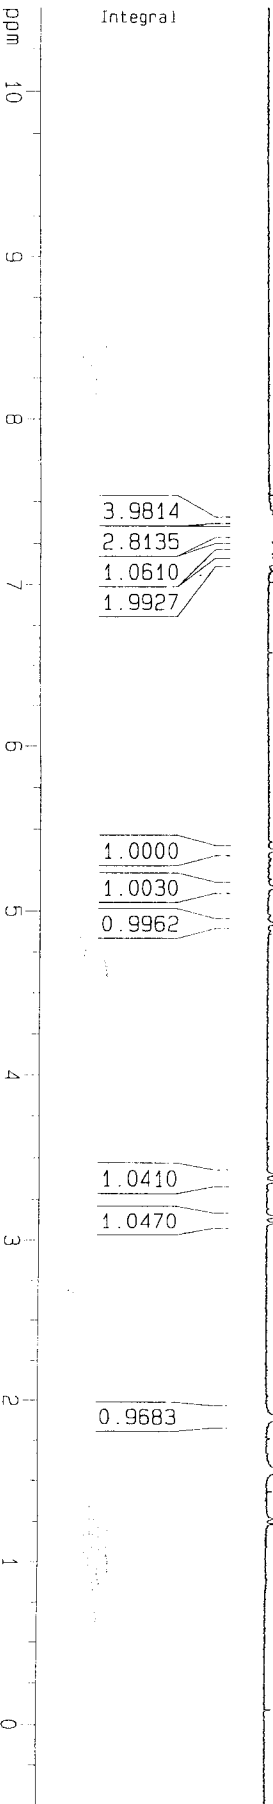

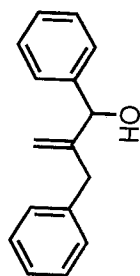

2h<sup>1</sup> (TES group deprotected)

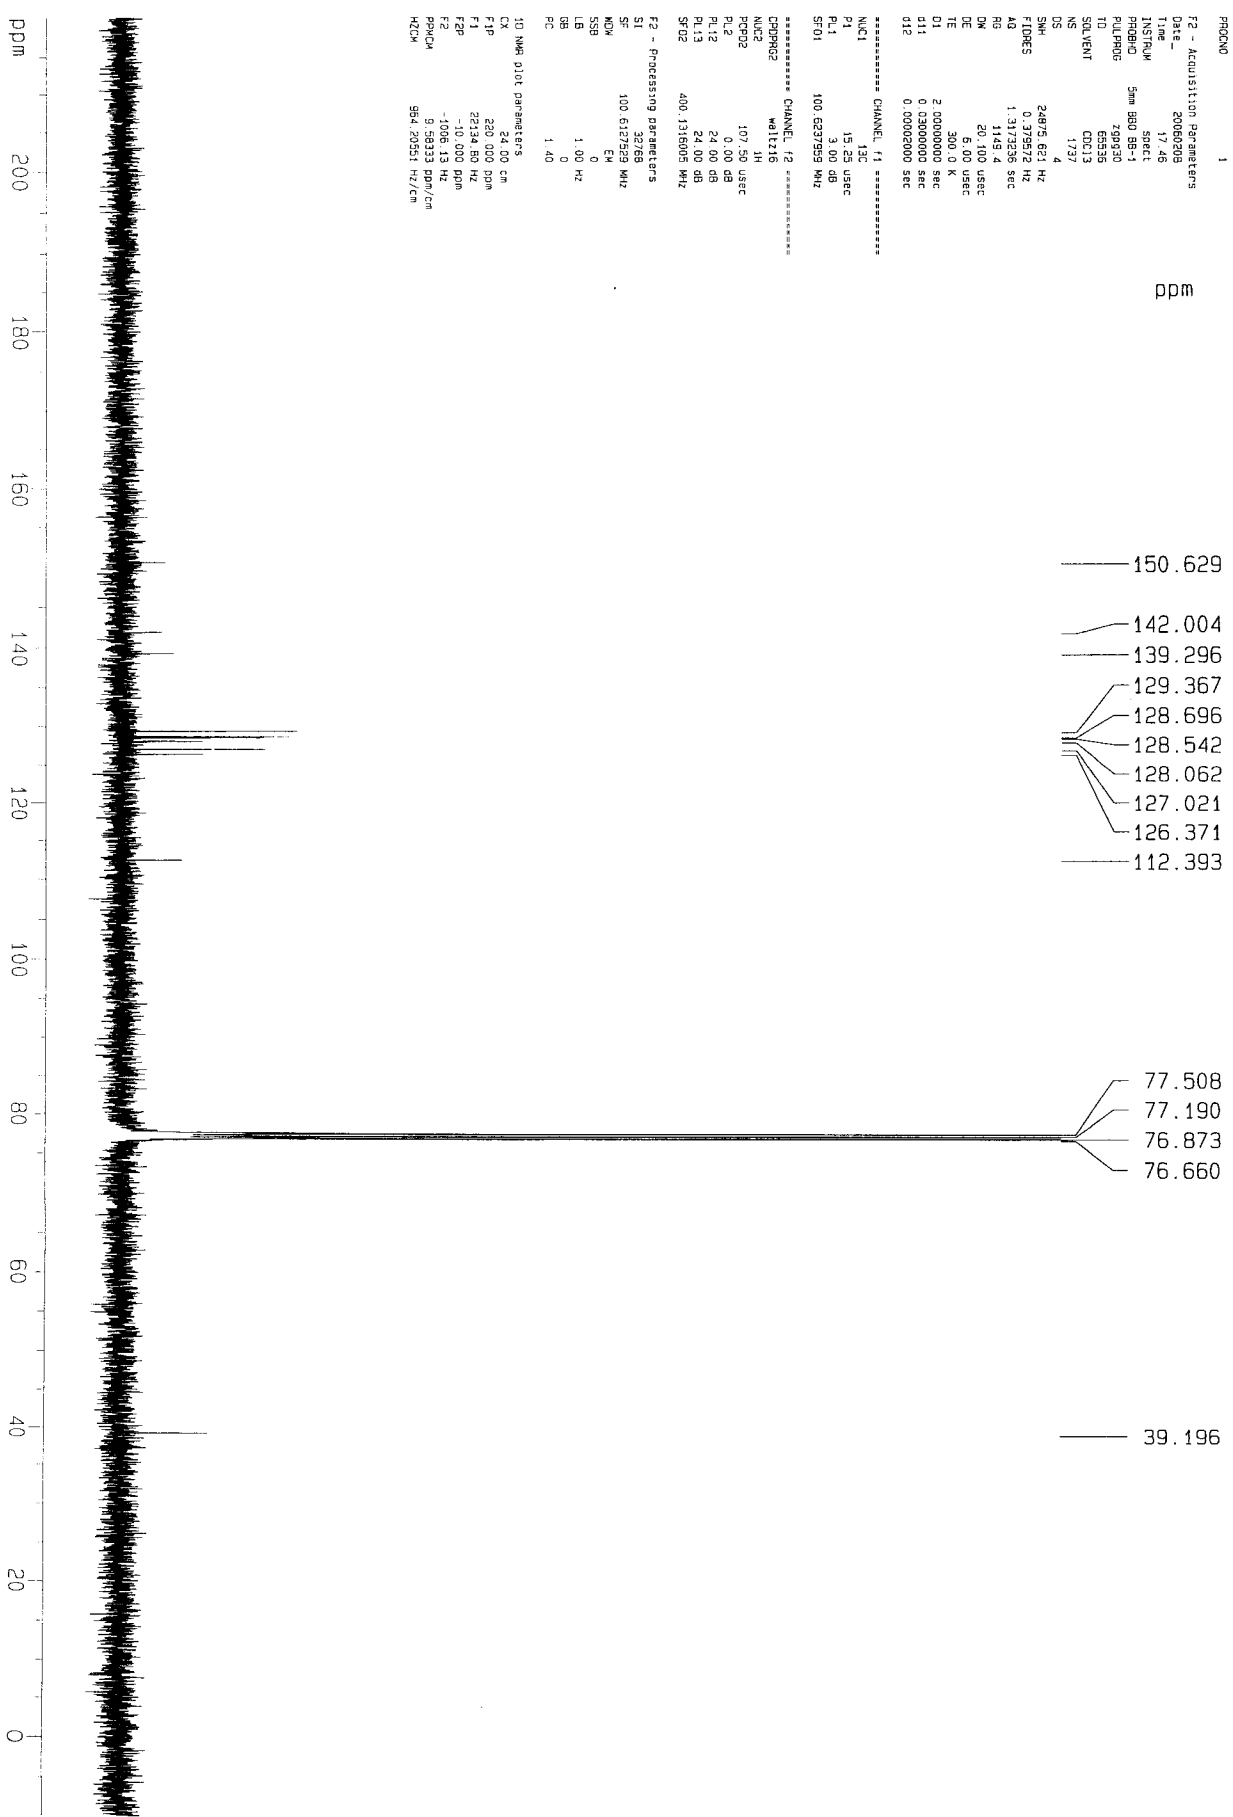

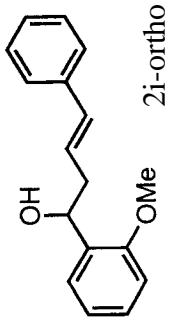

o-OMe, TES deprot

```

===== CHANNEL f1 =====
NAME          NUC1  IH
EXPNO         1
PROCNO        1
=====
F2 - Acquisition Parameters
Date_         20080403
Time          15.56
INSTRUM       spect
PROBHD        Smm 6SD BB-1
PULPROG       zgpg30
TD            65536
SOLVENT       COCl3
NS            7
DS            2
SWH           6279.146 Hz
FIDRES       0.126314 Hz
AQ           3.996243 sec
RG           71.8
DM           60.400 usec
DE           6.00 usec
TE           300.0 K
D1           1.0000000 sec
=====
F2 - Processing parameters
SI           32768
SF           400.1300016 MHz
WDW          EM
SSB          0
LB           0 Hz
GB           0
PC           0.001
=====
F2 - NMR D1/D2 Parameters
SI           32768
SF           400.1300016 MHz
WDW          EM
SSB          0
LB           0 Hz
GB           0
PC           0.001
=====

```

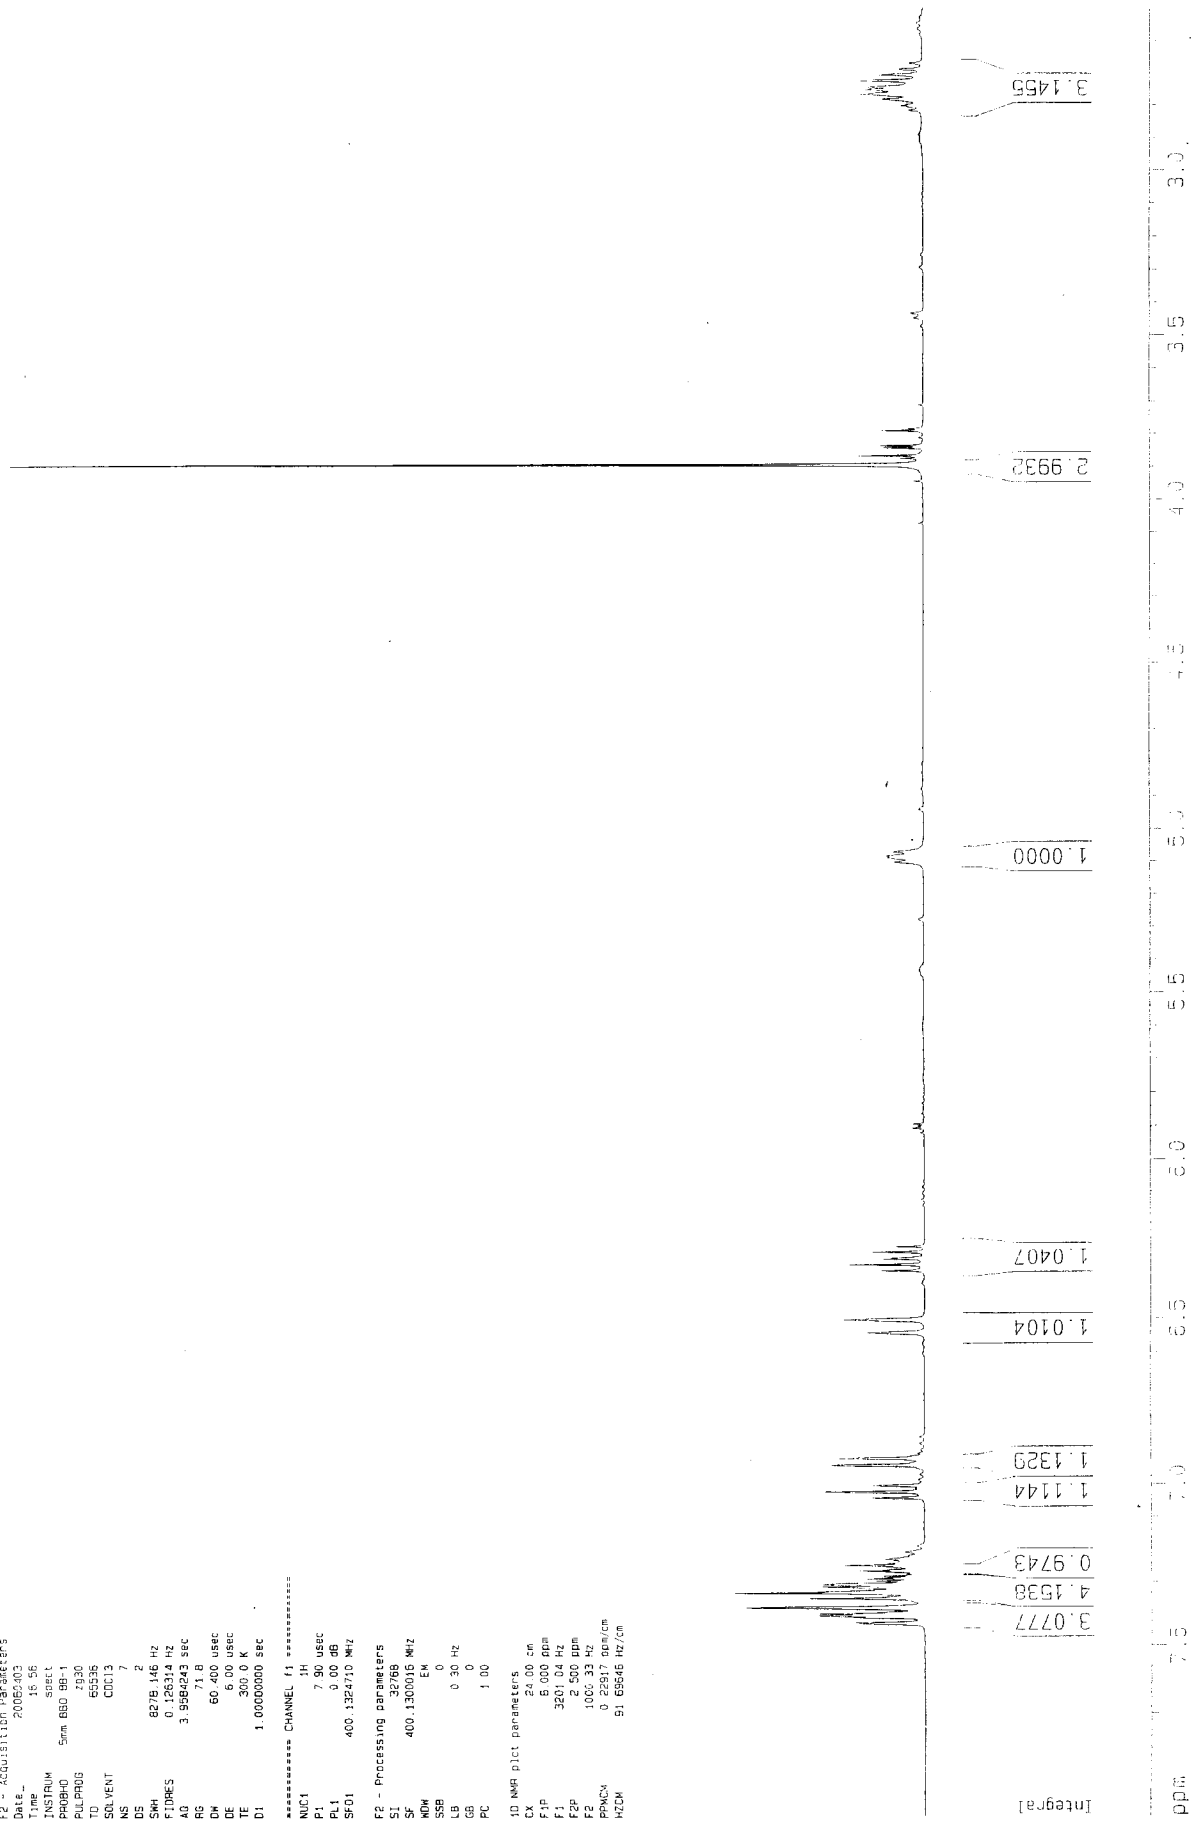



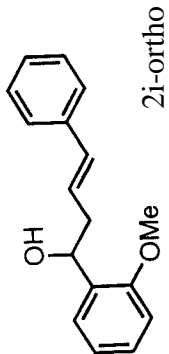

Current List Parameters  
 NAME 15.6-1520  
 EXPNO 22  
 PROCNO 1

F2 - Acquisition Parameters

Date\_ 20060403  
 Time 11:04  
 INSTRUM spect  
 PROBRW 5  
 PULPROG zgpg30  
 TD 65536  
 SOLVENT CDCl3  
 NS 299  
 DS 4  
 SWH 24875.621 Hz  
 FIDRES 0.379572 Hz  
 AQ 1.3113236 sec  
 RG 1824.6  
 DW 20.100 usec  
 DE 6.00 usec  
 TE 300.0 K  
 D1 2.0000000 sec  
 d11 0.0300000 sec  
 d12 0.0002000 sec

\*\*\*\*\* CHANNEL f1 \*\*\*\*\*

NUC1 13C  
 P1 15.25 usec  
 PL1 3.00 dB  
 SF01 100.6237569 MHz

\*\*\*\*\* CHANNEL f2 \*\*\*\*\*

CPDPRG2 waltz16  
 NUC2 1H  
 P2 107.50 usec  
 PL2 0.00 dB  
 PL12 24.00 dB  
 PL13 24.00 dB  
 SF02 400.1318000 MHz

F2 - Processing parameters

SI 32768  
 SF 100.6127569 MHz  
 KW 64  
 SSB 0  
 LB 1.00 Hz  
 GB 0  
 PC 1.40

1D NMR Plot Parameters

CX 24.00 cm  
 F1P 170.000 ppm  
 F1 17104.17 Hz  
 F2P 35.000 ppm  
 F2 3521.45 Hz  
 PRACH 5.62500 ppm/cm  
 HZCW 555.94578 Hz/cm

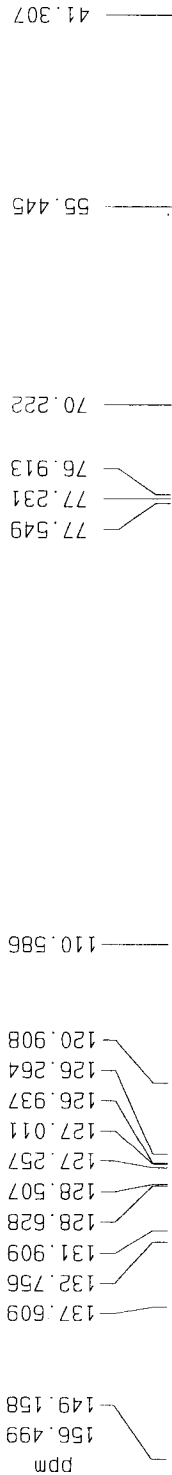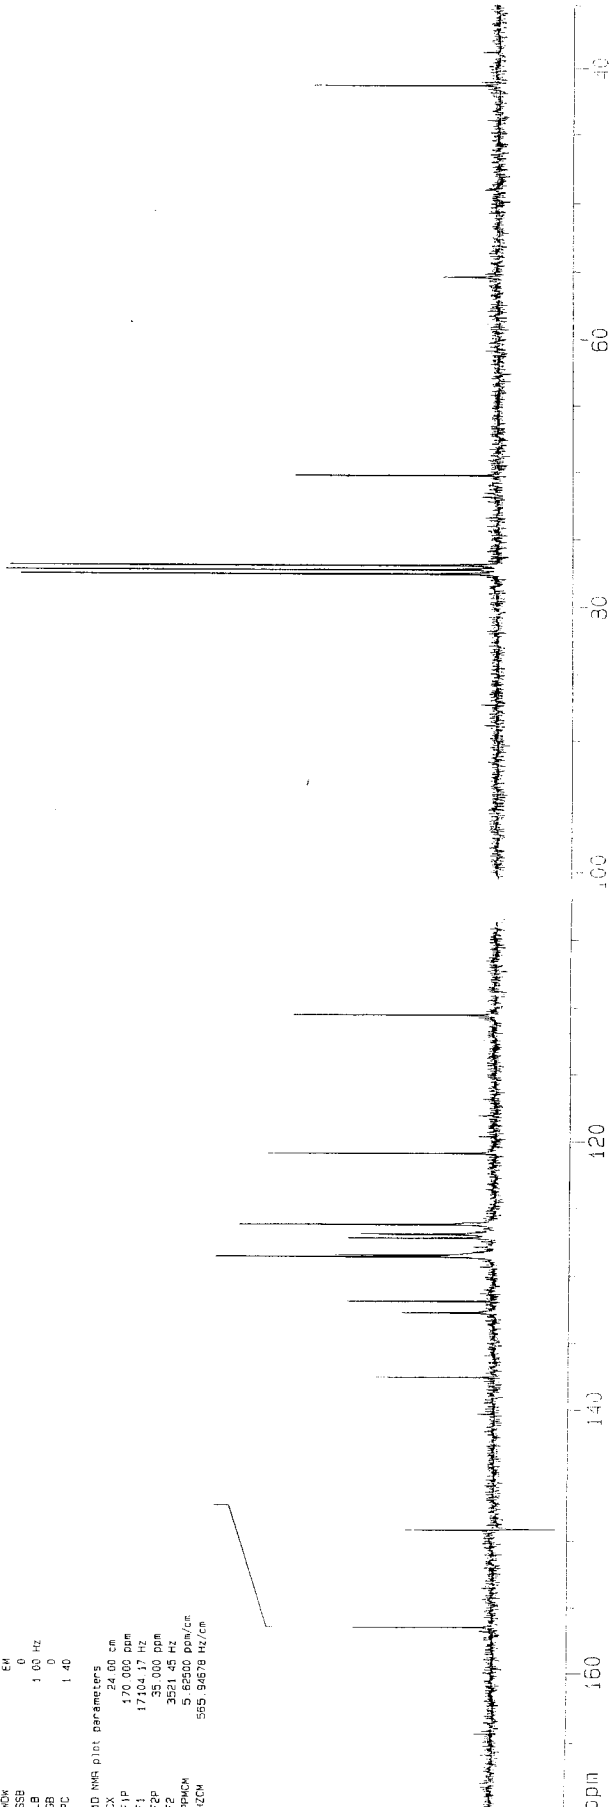

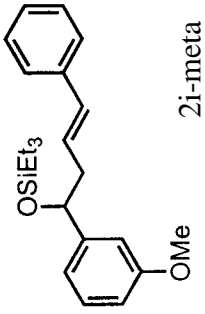

Current Data Parameters  
 Name hcy6-15612  
 EXPNO 1  
 PROCNO 1

F2 - Acquisition Parameters  
 Date\_ 20060403  
 Time 12.45  
 INSTRUM spect  
 PROBHD 5 mm QNP 1H/1  
 PULPROG zg30  
 TO 65536  
 SOLVENT CDCl<sub>3</sub>  
 NS B  
 DS 1  
 SWH 8278.146 Hz  
 FIDRES 0.8784 Hz  
 AQ 0.956243 sec  
 RG 398.5  
 DM 60.400 usec  
 DE 6.00 usec  
 TE 292.6 K  
 D1 1.00000000 sec  
 ACQRES1 0.00000000 sec  
 MC-MRK 0.01500000 sec

\*\*\*\*\* CHANNEL f1 \*\*\*\*\*  
 NUC1 1H  
 P1 9.86 usec  
 PL1 0.00 dB  
 SFO1 400.1324710 MHz

F2 - Processing parameters  
 SI 32768  
 SF 400.1300054 MHz  
 EM  
 C 0  
 B 0.30 Hz  
 S 0  
 B 0  
 C 1.00

D MMR plot parameters  
 X 0.00 cm  
 Y 0.00 cm  
 F1 400.500 dm  
 F1 4001.36 MHz  
 F2 -0.500 dm  
 F2 -200.07 Hz  
 PRFCH 0.45833 dm/cm  
 HZCN 163.39281 Hz/cm

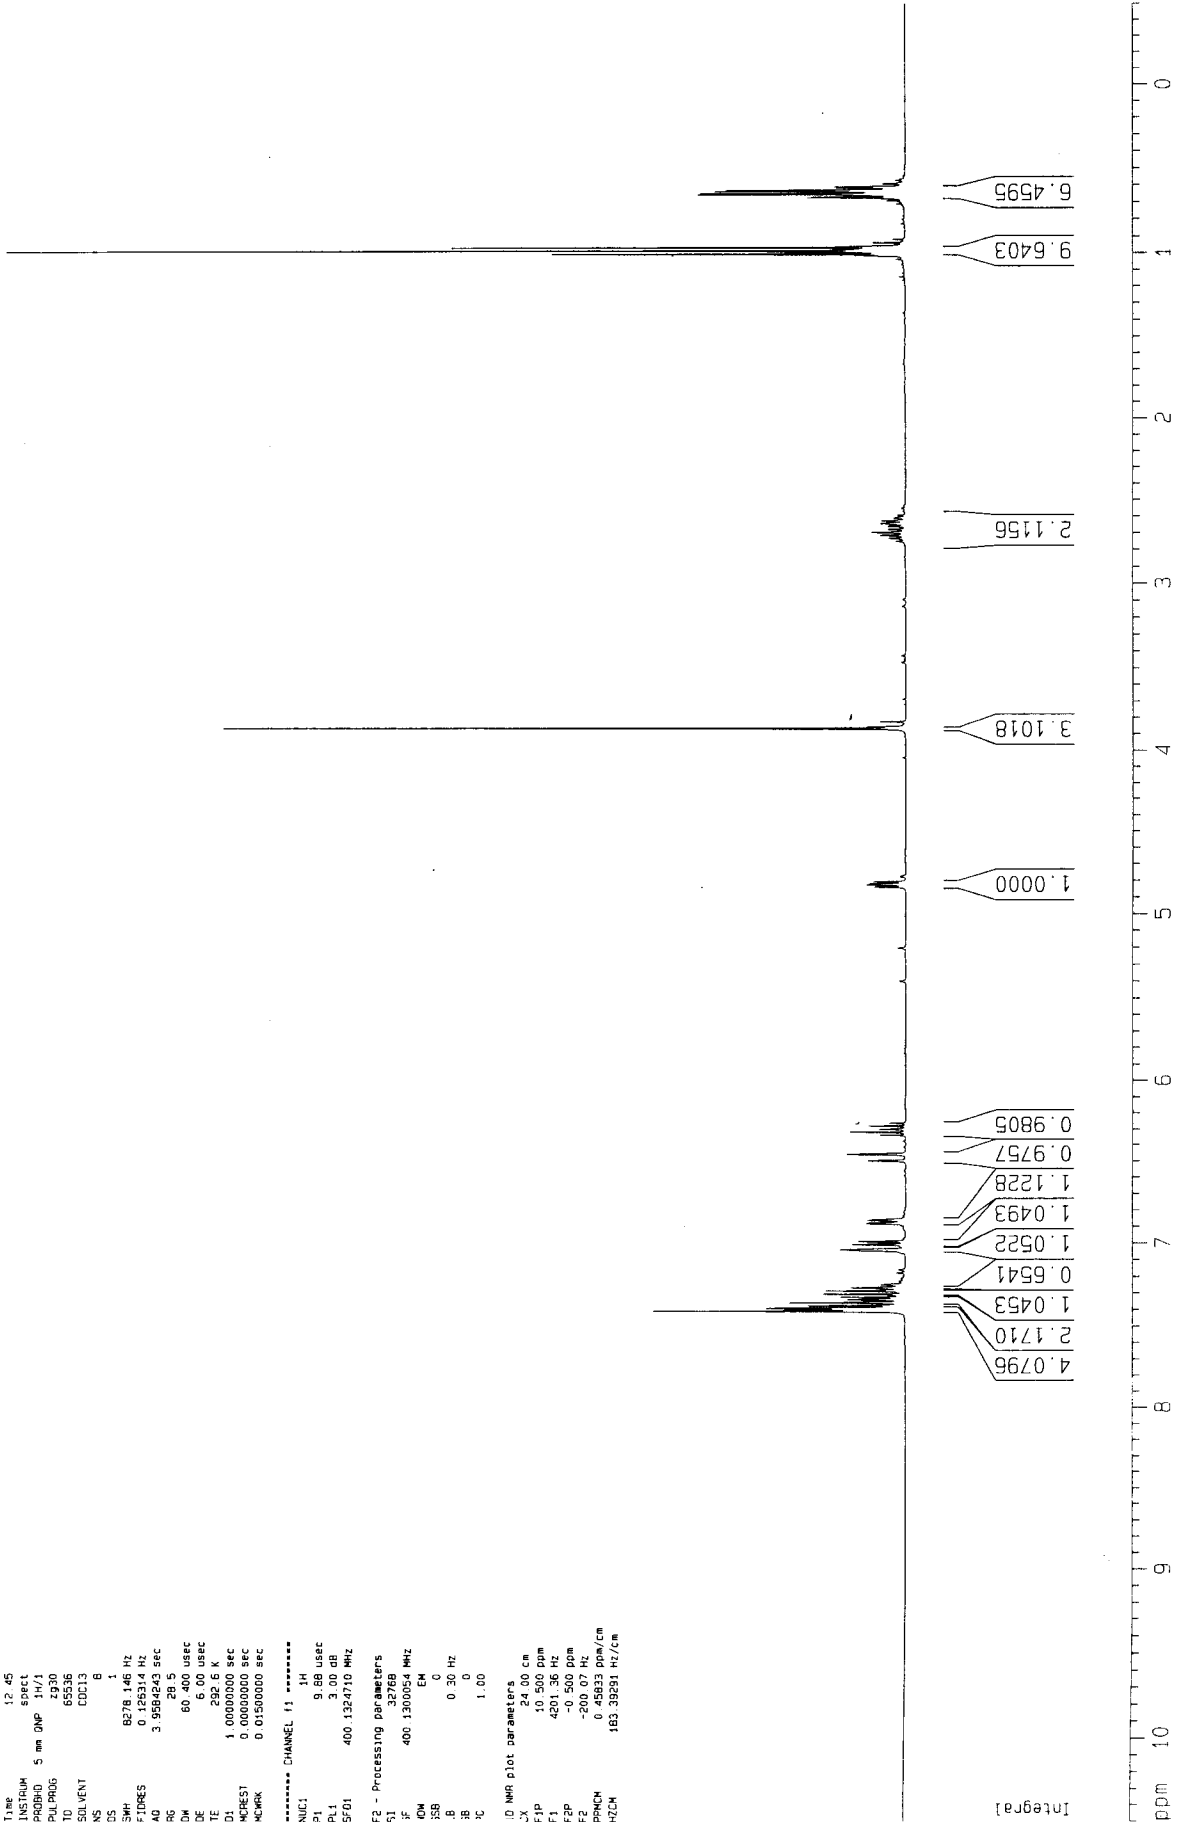

-91S-

Current Data Parameters  
 NAME hcy8-158r12  
 EXPNO 2  
 PROCNO 1

F2 - Acquisition Parameters

Date\_ 20060403  
 Time 12:51  
 INSTRUM spect  
 PROCNO 5  
 PULPROG zgpg30  
 TO 55:35  
 SOLVENT CDCl3  
 NS 92  
 DS 4  
 SWH 23580.614 Hz  
 FIDRES 0.365918 Hz  
 AQ 1.3864756 sec  
 RG 3251  
 DW 20.850 usec  
 DE 6.00 usec  
 TE 292.5 K  
 DE 2.0000000 sec  
 d11 0.0300000 sec  
 DELTA 1.8958888 sec  
 MGREST 0.0000000 sec  
 MOVIEK 0.01500000 sec

\*\*\*\*\* CHANNEL f1 \*\*\*\*\*  
 NUC1 13C  
 P1 8.50 usec  
 PL1 3.00 dB  
 SFO1 100.628258 MHz

\*\*\*\*\* CHANNEL f2 \*\*\*\*\*  
 CPDPRG2 waltz16  
 NUC2 13C  
 P2 88.01 usec  
 PL2 3.00 dB  
 PL12 22.00 dB  
 PL13 22.00 dB  
 SFO2 400.1316005 MHz

F2 - Processing parameters  
 S1 32768  
 SF 100.6127615 MHz  
 WDW EM  
 SSB 0  
 GB 1.00 Hz  
 SC 1.40

1D NMR Plot parameters  
 CX 24.00 cm  
 CY 6.33 cm  
 F1 215.353 ppm  
 F2 22069.67 Hz  
 F2 -1511.15 Hz  
 PRMCM 9.93115 ppm/cm  
 HZCM 999.40081 Hz/cm

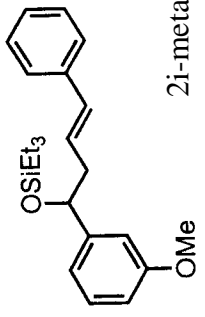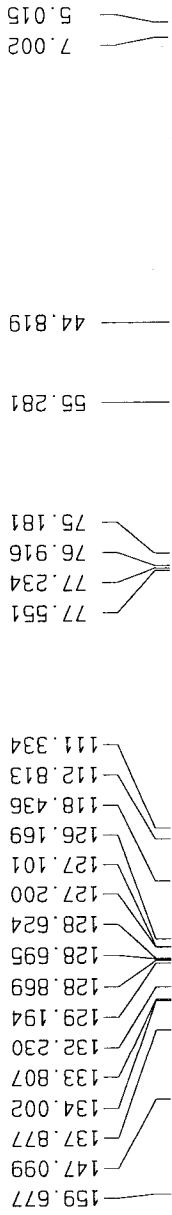

ppm

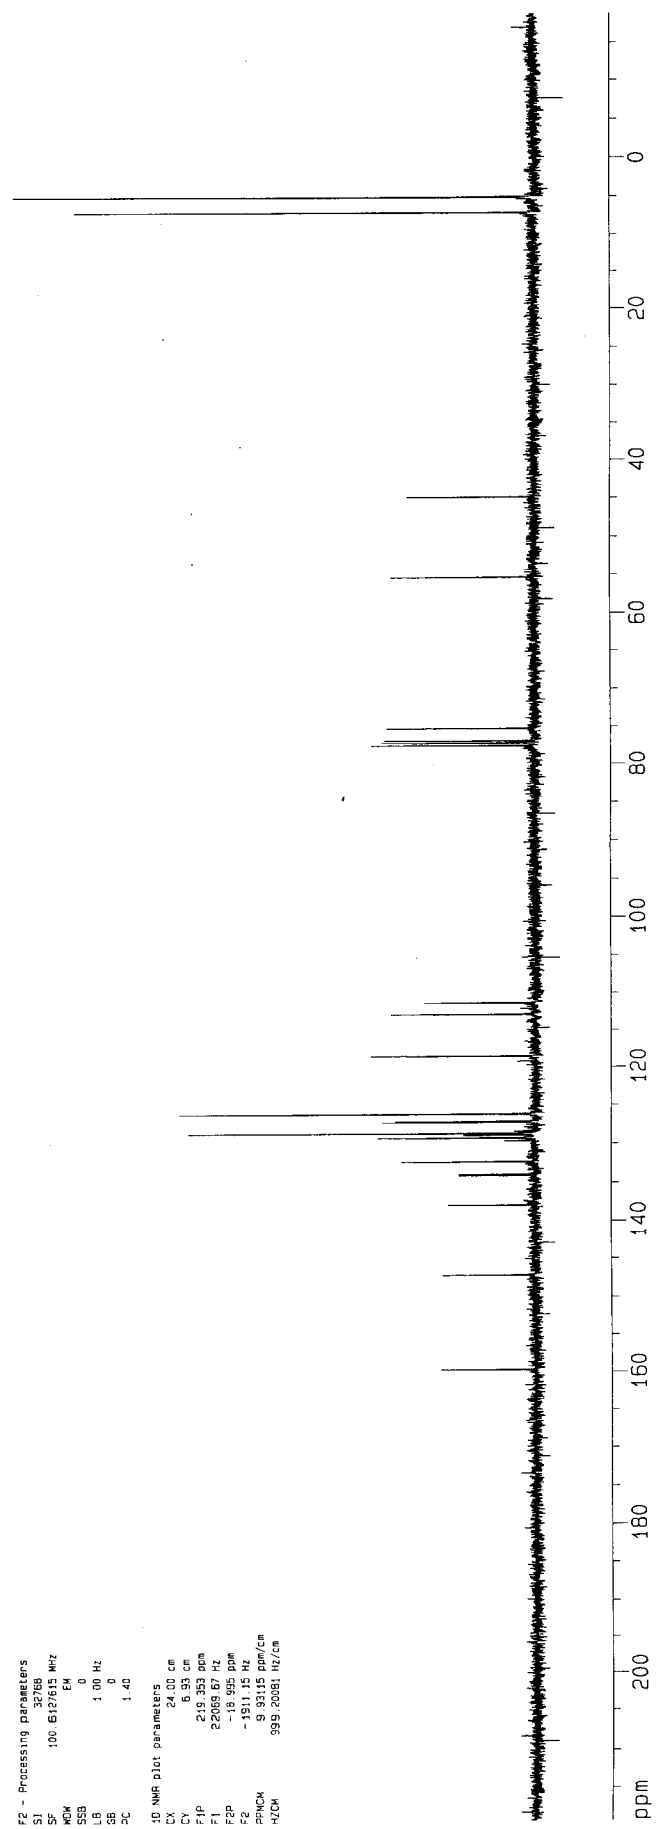

1  
H-pdt  
104-8-98

H-pdt

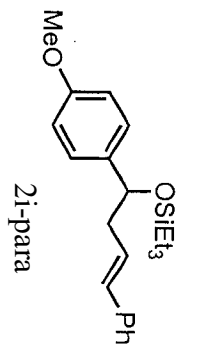

Current Data Parameters  
NAME H-pdt  
EXPNO 1  
PROCNO 1

F2 - Acquisition Parameters  
Date\_ 20060122  
Time 14.39  
INSTRUM spect  
PROBHD 5mm BBO BB-1  
PULPROG zg30  
TD 65536  
SOLVENT CCl3  
NS 5  
DS 2  
SWH 8278.146 Hz  
FIDRES 0.162614 Hz  
AQ 3.359222 sec  
RG 68  
OW 60.400 usec  
DE 6.00 usec  
TE 300.0 K  
D1 1.00000000 sec

\*\*\*\*\* CHANNEL f1 \*\*\*\*\*  
NUC1 1H  
P1 7.90 usec  
PL1 0.00 dB  
SFO1 400.1324710 MHz

F2 - Processing parameters  
SI 32768  
SF 400.1300018 MHz  
WDW EM  
SSB 0  
LB 0.30 Hz  
GB 0  
PC 1.00

10 MHz plot parameters  
CX 24.00 cm  
F1P 10.500 ppm  
F1 4201.36 Hz  
F2P -0.500 ppm  
F2 -200.07 Hz  
FREQ/M 0.05833 ppm/cm  
HZ/CM 183.35291 Hz/cm

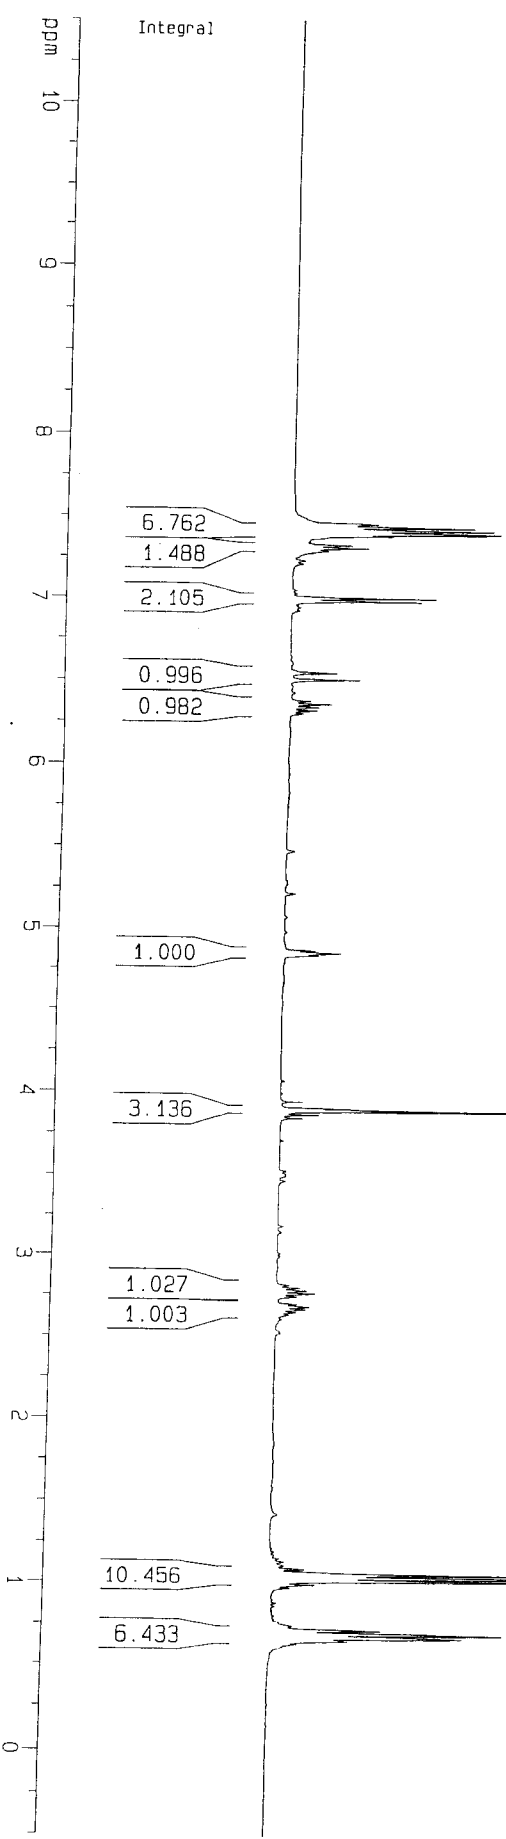

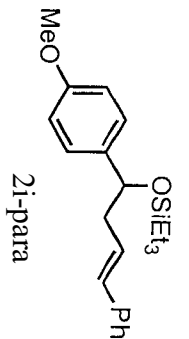

Current Data Parameters  
 NAME hcv8-38shot  
 EXNO 2  
 PROCNO 1

F2 - Acquisition Parameters  
 Date 2006122  
 Time 14.43  
 INSTRUM spect  
 PULPROG zgpg30  
 TD 65536  
 SOLVENT CDCl3  
 NS 93  
 DS 4  
 SFO1 2487.5821 Hz  
 FIDRES 0.379572 Hz  
 AQ 1.3172236 sec  
 RG 1024  
 DE 20.100 usec  
 TE 300.0 K  
 D1 2.000000 sec  
 d11 0.080000 sec  
 d12 0.0002000 sec

\*\*\*\*\* CHANNEL f1 \*\*\*\*\*  
 NUC1 13C  
 P1 15.25 usec  
 PL1 3.00 dB  
 SFO1 100.6237959 MHz

\*\*\*\*\* CHANNEL f2 \*\*\*\*\*  
 CPDPRG2 waltz16  
 NUC2 1H  
 P2 107.50 usec  
 PL2 0.00 dB  
 PL12 24.00 dB  
 PL13 24.00 dB  
 SFO2 400.1316005 MHz

F2 - Processing parameters  
 SI 32768  
 SF 100.6127529 MHz  
 KW EM  
 SSB 0  
 GB 1.00 Hz  
 PC 1.40

10 NMR plot parameters  
 CX 24.00 cm  
 FIP 220.000 ppm  
 F1 23134.80 Hz  
 F2 -10.000 ppm  
 F2 -1005.13 Hz  
 PPMCM 9.59333 ppm/cm  
 HZCM 964.20551 Hz/cm

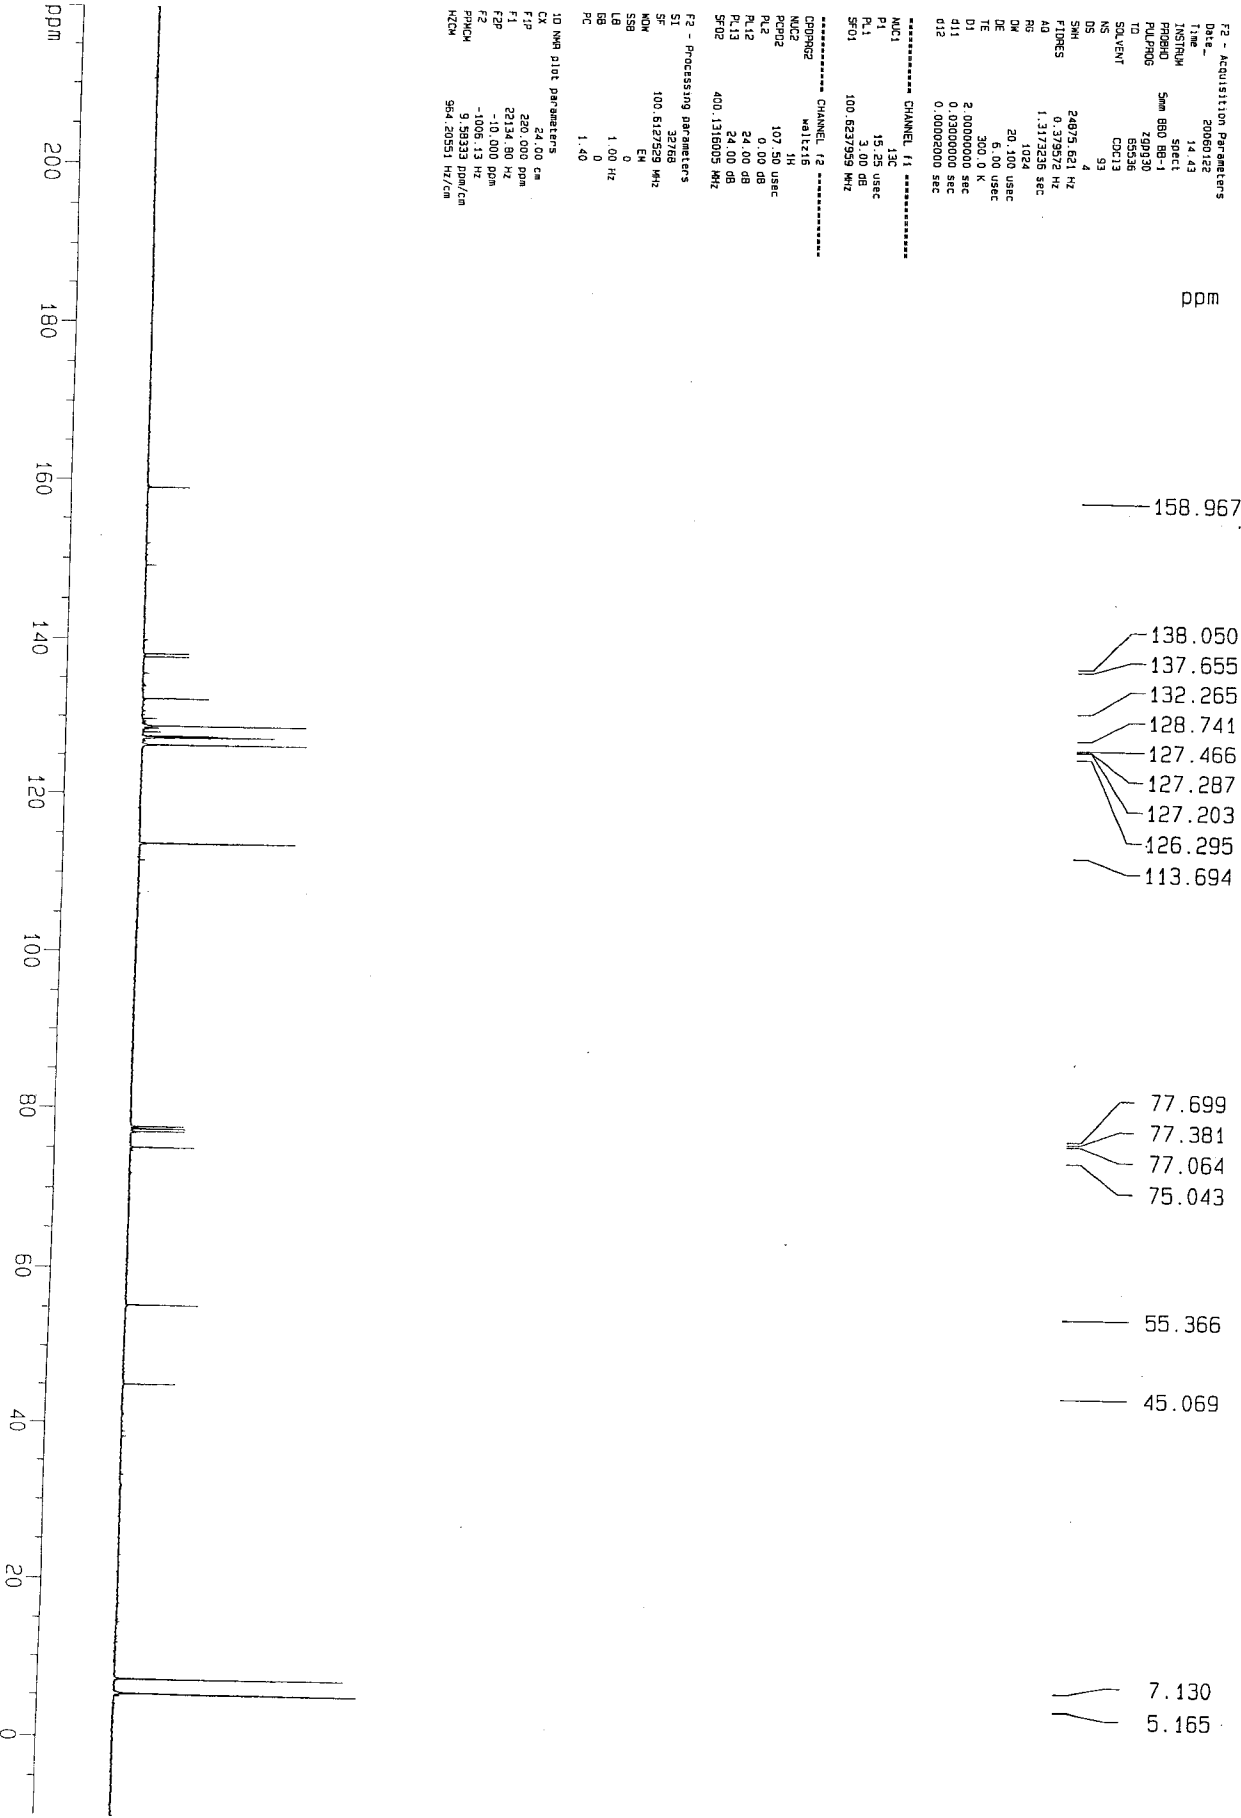

NY-8-99 H-pdt

H-pdt

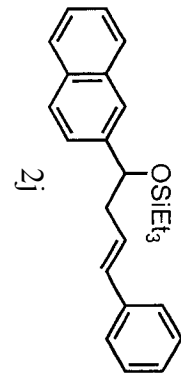

Current Data Parameters  
 NAME NY-8-99-Hpdt  
 EXPNO 1  
 PROCNO 1

F2 - Acquisition Parameters  
 Date\_ 20060126  
 Time 15:56  
 INSTRUM spect  
 PROBR4 Sma BBO BB-1  
 PULPROG zgpg30  
 TO 65536  
 SOLVENT CDCl3  
 NS 3  
 DS 2  
 SWH 8278.146 Hz  
 FIDRES 0.126314 Hz  
 AQ 3.9584243 sec  
 RG 2072  
 DW 60.400 usec  
 DE 5.500 usec  
 TE 300.0 K  
 D1 1.00000000 sec

\*\*\*\*\* CHANNEL f1 \*\*\*\*\*  
 NUC1 1H  
 P1 7.90 usec  
 PL1 0.00 dB  
 SFO1 400.1324710 MHz

F2 - Processing parameters  
 SI 32768  
 SF 400.1300010 MHz  
 MDW 64  
 SSB 0  
 LB 0.30 Hz  
 GB 0  
 PC 1.00

10 NMR data parameters  
 CX 24.00 cm  
 F1P 10.500 ppm  
 F1 4201.36 Hz  
 F2P -0.500 ppm  
 F2 -200.07 Hz  
 PRNCH 0.45833 ppm/cm  
 NCH 189.59291 Hz/cm

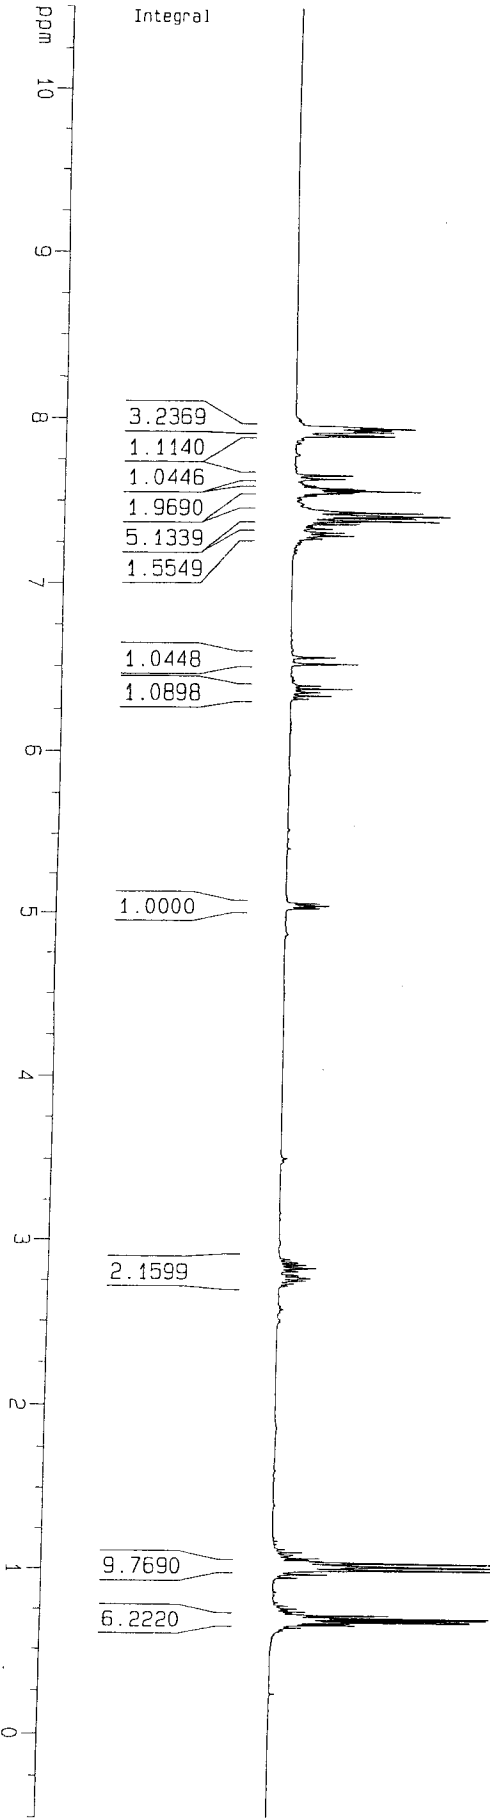

Current Data Parameters  
 NAME 103957-N004  
 EXPNO 2  
 PROCNO 1

F2 - Acquisition Parameters  
 Date\_ 20060326  
 Time 16:40  
 INSTRUM spect  
 PROBRD 5mm BBO BB-1  
 PULPROG zgpg30  
 TD 65536  
 SOLVENT CDCl3  
 NS 772  
 DS 4  
 SWH 24875.621 Hz  
 FIDRES 0.379572 Hz  
 AQ 1.317259 sec  
 RG 64  
 DW 20.104 usec  
 DE 6.00 usec  
 TE 300.0 K  
 D1 2.00000000 sec  
 d11 0.03000000 sec  
 d12 0.00002000 sec

\*\*\*\*\* CHANNEL f1 \*\*\*\*\*  
 NUCL1 13C  
 P1 15.25 usec  
 F1 3.00 dB  
 SFO1 100.6237959 MHz

\*\*\*\*\* CHANNEL f2 \*\*\*\*\*  
 GPCPRG2 waltz16  
 NUCL2 1H  
 PCPR2 107.50 usec  
 PL2 0.00 dB  
 PL12 24.00 dB  
 PL13 24.00 dB  
 SFO2 400.1316005 MHz

F2 - Processing parameters  
 SI 32768  
 SF 100.6127628 MHz  
 WHW 0  
 SSB 0  
 LB 1.00 Hz  
 GB 0  
 PC 1.40

ID NMR plot parameters  
 CX 24.00 cm  
 FIP 220.000 ppm  
 F1 22134.80 Hz  
 F2P -10.000 ppm  
 F2 -1006.13 Hz  
 PPHC0 3.58333 DM/cm  
 HZCM 964.20557 Hz/cm

ppm

- 142.858
- 137.865
- 133.427
- 133.065
- 132.365
- 128.645
- 128.137
- 128.048
- 127.893
- 127.140
- 126.214
- 126.099
- 125.723
- 124.559
  
- 77.551
- 77.233
- 76.915
- 75.448
  
- 44.851
  
- 7.040
- 5.061

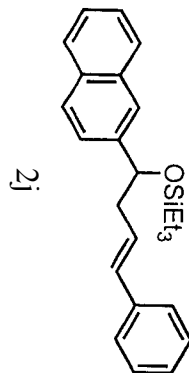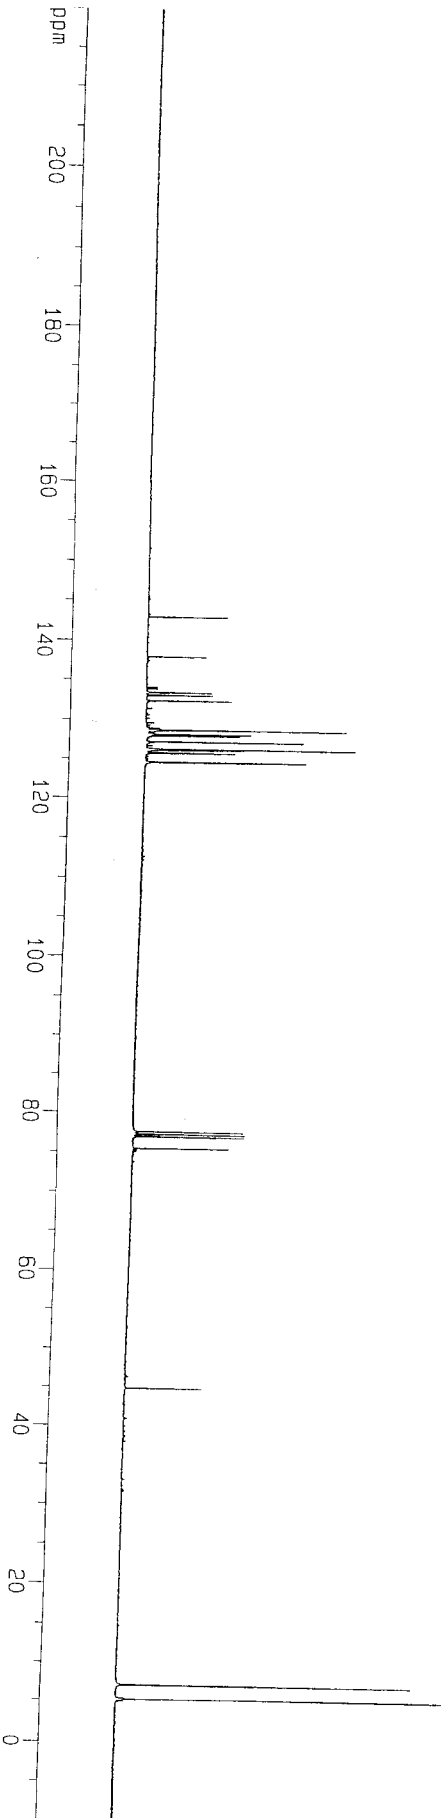

MSY-8-104 dr - Apdt

TES deprotection, Apdt

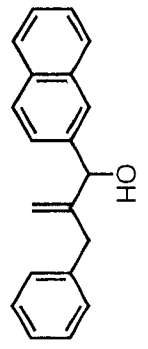

2j' (TES group deprotected)

Current Data Parameters  
 NAME MSY-104dr-Apdt  
 EXPNO 1  
 PROCNO 1

F2 - Acquisition Parameters  
 Date\_ 20060202  
 Time 17.33  
 INSTRUM spect  
 PROBRD 5mm BBO BB-1  
 PULPROG zg30  
 ID 65536  
 SOLVENT CDCl3  
 NS 7  
 DS 2  
 SM 6278.148 Hz  
 FIDRES 0.21314 Hz  
 AQ 3.56463 sec  
 RG 456.4  
 DW 60.400 usec  
 DE 6.00 usec  
 TE 300.2 K  
 D1 1.00000000 sec

\*\*\*\*\* CHANNEL f1 \*\*\*\*\*  
 NUCL1 1H  
 P1 7.50 usec  
 PL 0.00 dB  
 SF01 400.1324710 MHz

F2 - Processing parameters  
 SI 32768  
 SF 400.1300016 MHz  
 WDW EM  
 SSB 0  
 LB 0.30 Hz  
 GB 0  
 PC 1.00

10 MHz plot parameters  
 DX 24.00 cm  
 F1 10.500 ppm  
 F2 420.38 Hz  
 F3 -30.000 ppm  
 F4 -30.000 Hz  
 PH0CM 0.46933 Hz/cm  
 HZCM 183.39291 Hz/cm

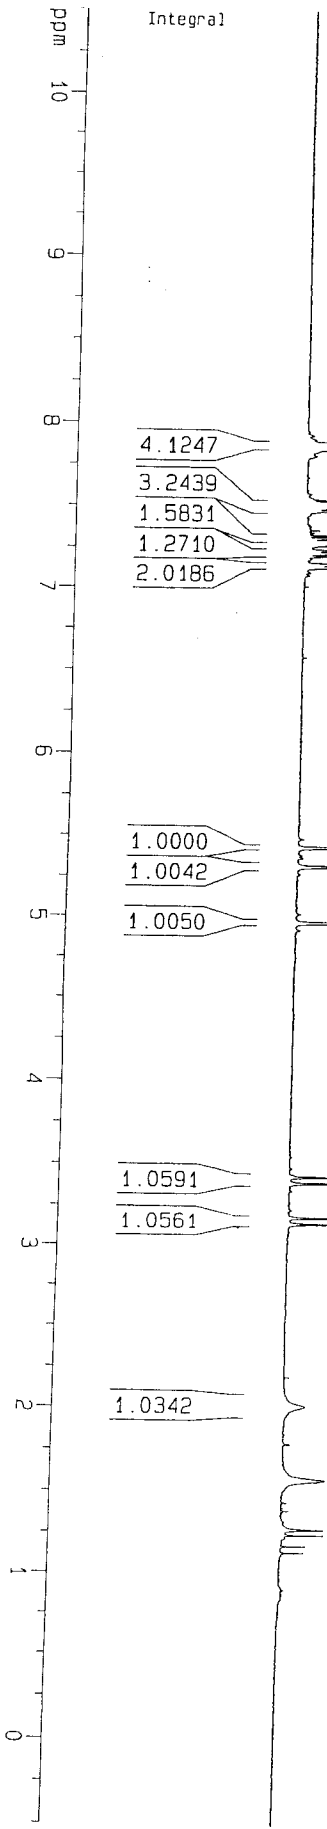



Current Data Parameters  
 NAME hcpd-10car-40a  
 EXPNO 1  
 PROCNO 1

F2 - Acquisition Parameters  
 Date\_ 20060203  
 Time 17.57  
 INSTRUM spect  
 PROBHD 5mm BBO BB-1  
 PULPROG zgpg30  
 TO 209930  
 SOLVENT DMSO  
 NS 2483  
 DS 4  
 SWH 24875.621 Hz  
 FIDRES 0.32782 Hz  
 AQ 1.317232 sec  
 RG 574.7  
 DW 20.100 usec  
 DE 300.0 K  
 TE 6.00 usec  
 D1 2.00000000 sec  
 D11 0.02000000 sec  
 D12 0.00002000 sec

\*\*\*\*\* CHANNEL f1 \*\*\*\*\*  
 NUC1 13C  
 P1 19.29 usec  
 PL1 3.00 dB  
 SFO1 100.6237959 MHz  
 \*\*\*\*\* CHANNEL f2 \*\*\*\*\*  
 CPDPRG2 waltz16  
 NUC2 1H  
 P2 107.50 usec  
 PL2 0.00 dB  
 PL12 24.00 dB  
 PL13 24.00 dB  
 SFO2 400.1315005 MHz

F2 - Processing parameters  
 SI 32768  
 SF 100.6127525 MHz  
 MGHZ EM  
 SSB 0  
 LB 1.00 Hz  
 GB 0  
 PC 1.40

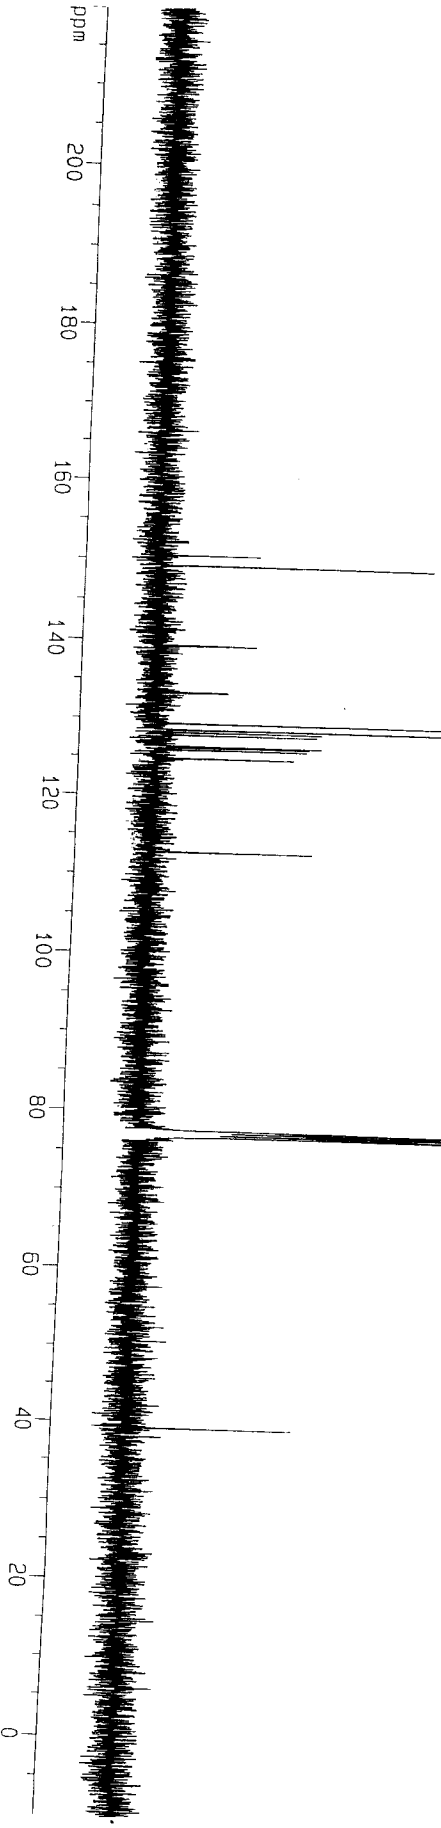

- 150.510
- 149.210
- 139.370
- 139.268
- 133.424
- 133.277
- 129.397
- 128.558
- 128.211
- 127.880
- 126.395
- 126.359
- 126.215
- 125.969
- 124.846
- 112.791
  
- 77.511
- 77.397
- 77.193
- 76.876

39.212

2j' (TES group deprotected)

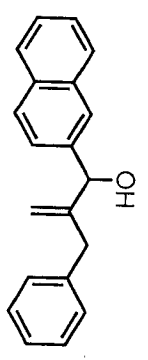

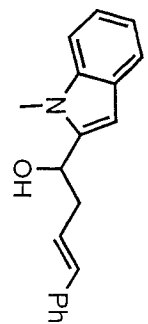

2k (TES group deprotected)

Me-Indo-2-CHO AllylPh coupling, H pdt deprotection

Current Data Parameters  
 NAME: HCV8-7106-Hpdt  
 EXPNO: 1  
 PROCNO: 1

F2 - Acquisition Parameters  
 Date\_: 20051210  
 Time: 12.45  
 F1FHM: 500.136314 MHz  
 PULPROG: zgpg30  
 TD: 65536  
 SOLVENT: CDCl3  
 NS: 5  
 DS: 2  
 SMI: 8278.146 Hz  
 FIDRES: 0.126314 Hz  
 AQ: 3.984243 sec  
 RG: 297.4  
 DM: 60.400 usec  
 DE: 6.00 usec  
 TE: 300.0 K  
 D1: 1.00000000 sec

\*\*\*\*\* CHANNEL f1 \*\*\*\*\*  
 NUC1: 1H  
 P1: 7.50 usec  
 PL1: 0.00 dB  
 SFO1: 400.1324710 MHz

F2 - Processing parameters  
 SI: 32768  
 SF: 400.1300018 MHz  
 MDW: EM  
 SSB: 0  
 LB: 0.30 Hz  
 GB: 0  
 PC: 1.00

1D NMR plot parameters  
 CX: 24.00 cm  
 F1P: 10.500 ppm  
 F1: 4201.36 Hz  
 F2P: -0.500 ppm  
 F2: -200.07 Hz  
 PPM/CM: 0.45833 ppm/cm  
 HZ/CM: 183.39291 Hz/cm

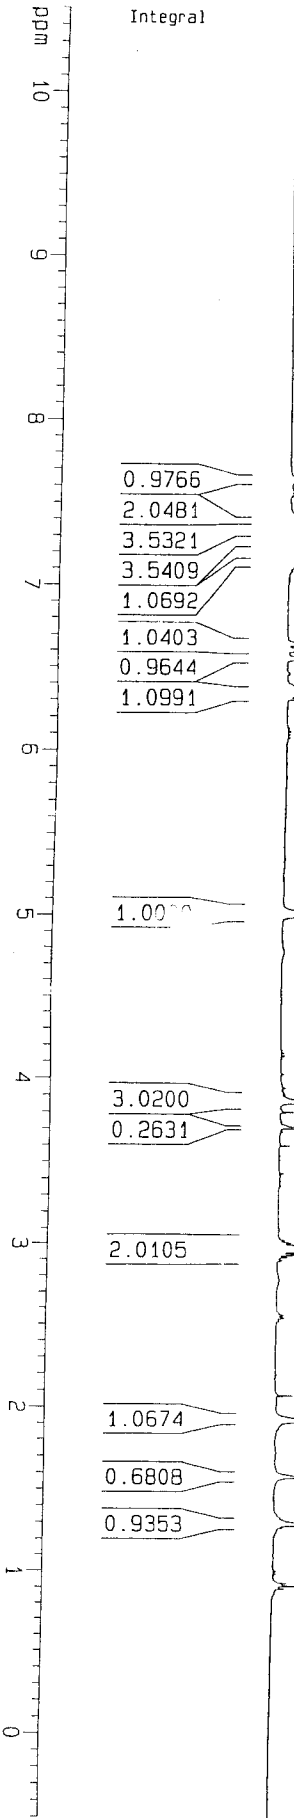

2k (TEES group deprotected)

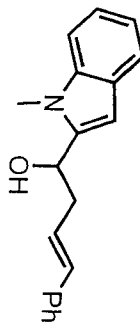

- 149.210
- 141.305
- 138.119
- 137.200
- 133.821
- 128.741
- 127.632
- 127.298
- 126.378
- 125.677
- 122.056
- 120.961
- 119.768
- 109.320
- 99.376
- 77.521
- 77.203
- 76.886
- 66.921
- 40.166
- 30.353

Current Data Parameters  
 NAME NS18-708-INDT  
 EXPNO 2  
 PROCNO 1

F2 - Acquisition Parameters  
 Date\_ 20051210  
 Time 12.49  
 INSTRUM spect  
 PROBRD 5mm BBO BB-1  
 PULPROG zgpg30  
 TD 65536  
 SOLVENT CDCl3  
 NS 651  
 DS 4  
 SWH 24875.621 Hz  
 FTWRES 0.379572 Hz  
 AQ 1.322626 sec  
 RG 64  
 DW 20.100 usec  
 DE 6.00 usec  
 TE 300.0 K  
 D1 2.00000000 sec  
 d12 0.03000000 sec  
 0.00002000 sec

\*\*\*\*\* CHANNEL f1 \*\*\*\*\*  
 NUCl1 13C  
 P1 15.25 usec  
 SFO1 100.6237959 MHz

\*\*\*\*\* CHANNEL f2 \*\*\*\*\*  
 CDPORG2 NA1TC14  
 NUCl2 1H  
 P2 107.50 usec  
 PCPR2 0.00 dB  
 PL12 24.00 dB  
 PL13 24.00 dB  
 SFO2 400.1316005 MHz

F2 - Processing parameters  
 SI 32766  
 SF 100.6127529 MHz  
 SW 4000.000000 Hz  
 EM 0  
 SSB 0  
 LB 1.00 Hz  
 GB 0  
 PC 1.40

10 NMR plot parameters  
 CX 24.00 cm  
 FIP 220.000 ppm  
 F1 22134.80 Hz  
 F2P -10.000 ppm  
 F2 -1005.13 Hz  
 PPRCM 9.58333 ppm/cm  
 MCM 954.20051 Hz/cm

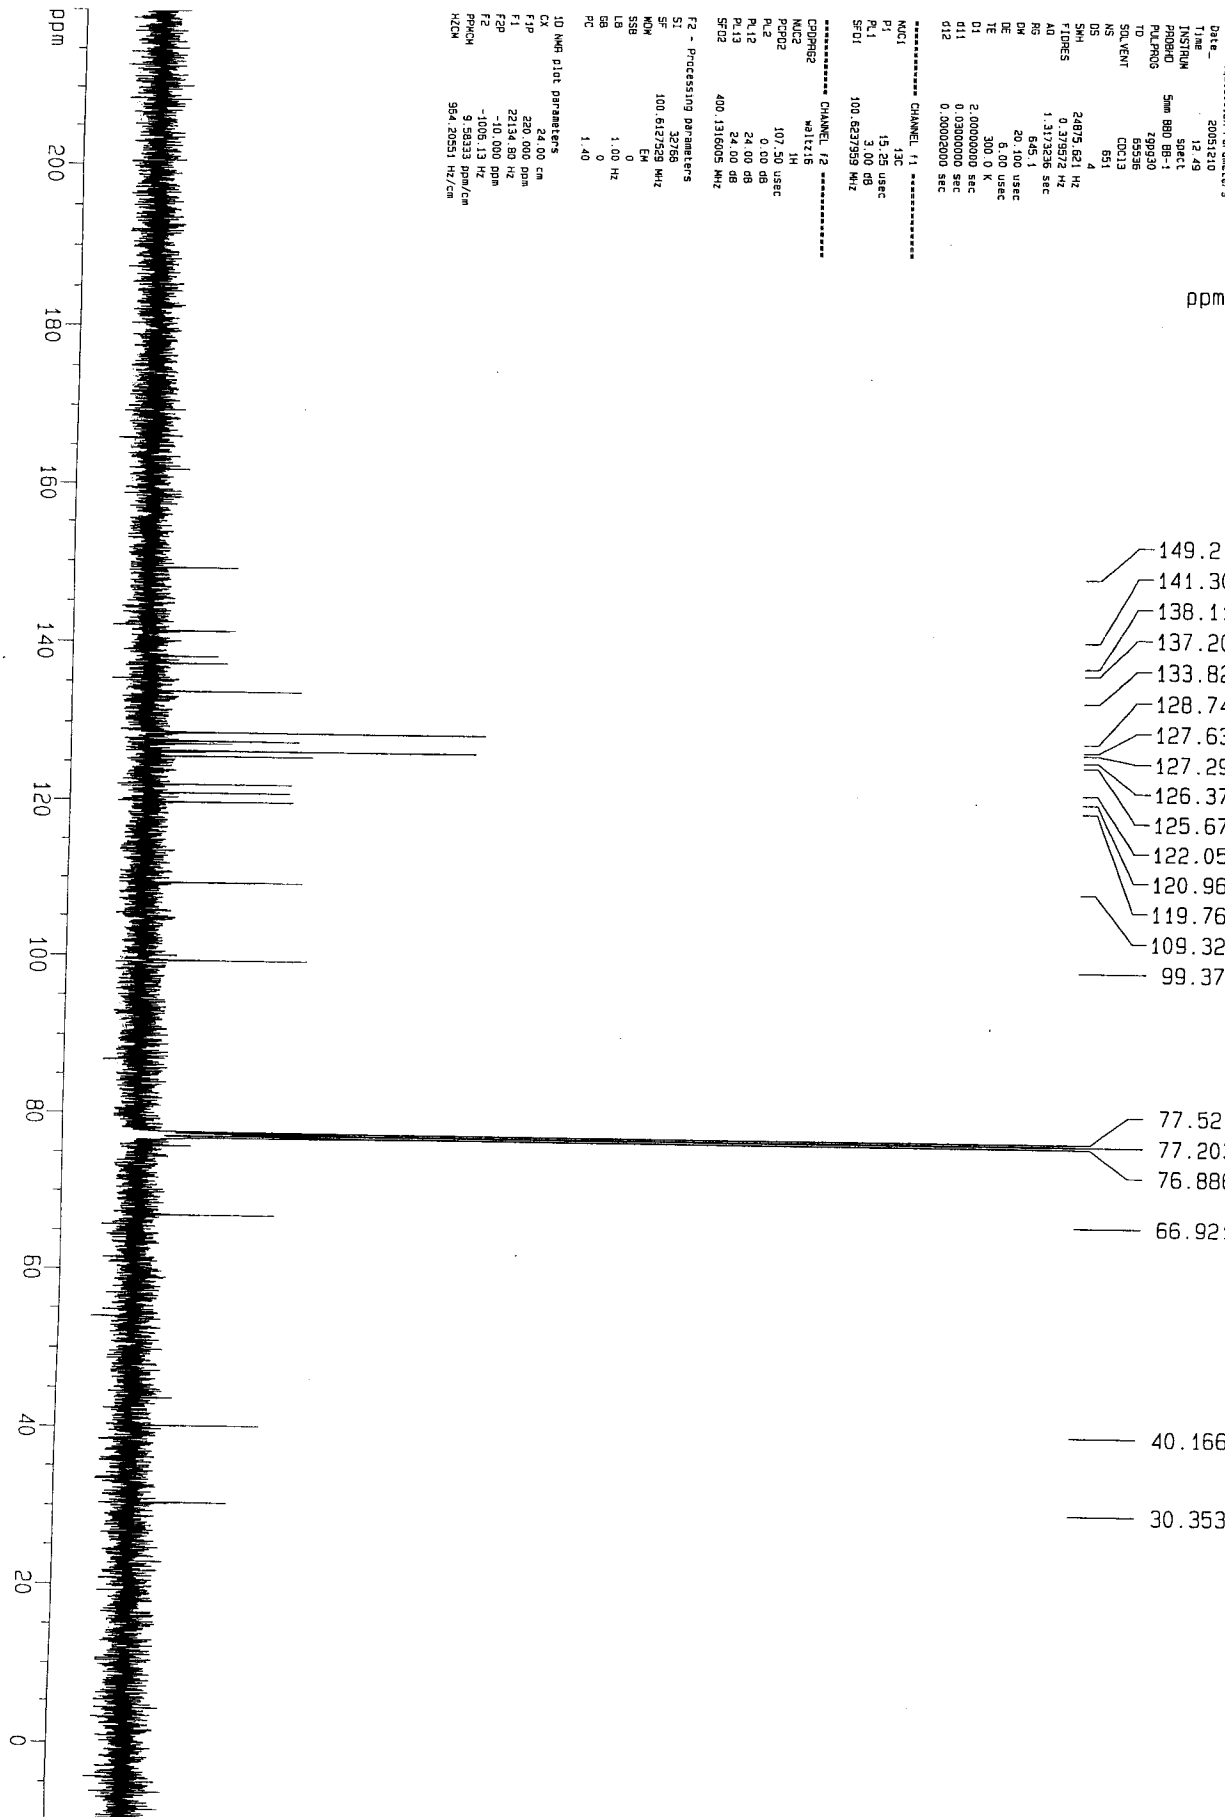

Cy2PPh f9 deprotection, f6

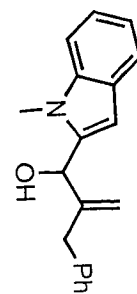

2K' (TES group deprotected)

Current Data Parameters  
 Name: cy2p-ph-700c19-6  
 ExpNO: 1  
 F2ProcNO: 1

F2 - Acquisition Parameters  
 Date\_: 20051222  
 Time: 14:52  
 INSTRUM: spect  
 PROBRD: 5mm BBO BB-1  
 PULPROG: zg30  
 TO: 65536  
 SOLVENT: CDCl3  
 NS: 12  
 DS: 2  
 SWH: 8278.146 Hz  
 FIDRES: 0.182914 Hz  
 AQ: 3.9584443 sec  
 RG: 181  
 DW: 60.400 usec  
 DE: 300.0 K  
 TE: 1.00000000 sec  
 O1: 1.00000000 sec

\*\*\*\*\* CHANNEL f1 \*\*\*\*\*  
 NUC1: 1H  
 P1: 7.90 usec  
 PL1: 0.00 dB  
 SF01: 400.1384710 MHz

F2 - Processing parameters  
 SI: 32768  
 SF: 400.1380018 MHz  
 KW: 64  
 SSB: 0  
 LB: 0.30 Hz  
 GB: 0  
 PC: 1.00

10 NMR Plot Parameters  
 CX: 24.00 cm  
 F1P: 10.500 ppm  
 F1: 4201.36 Hz  
 F2P: -0.500 ppm  
 F2: 200.07 Hz  
 FREQCN: 9.48833 ppm/cm  
 HZCN: 183.3921 Hz/cm

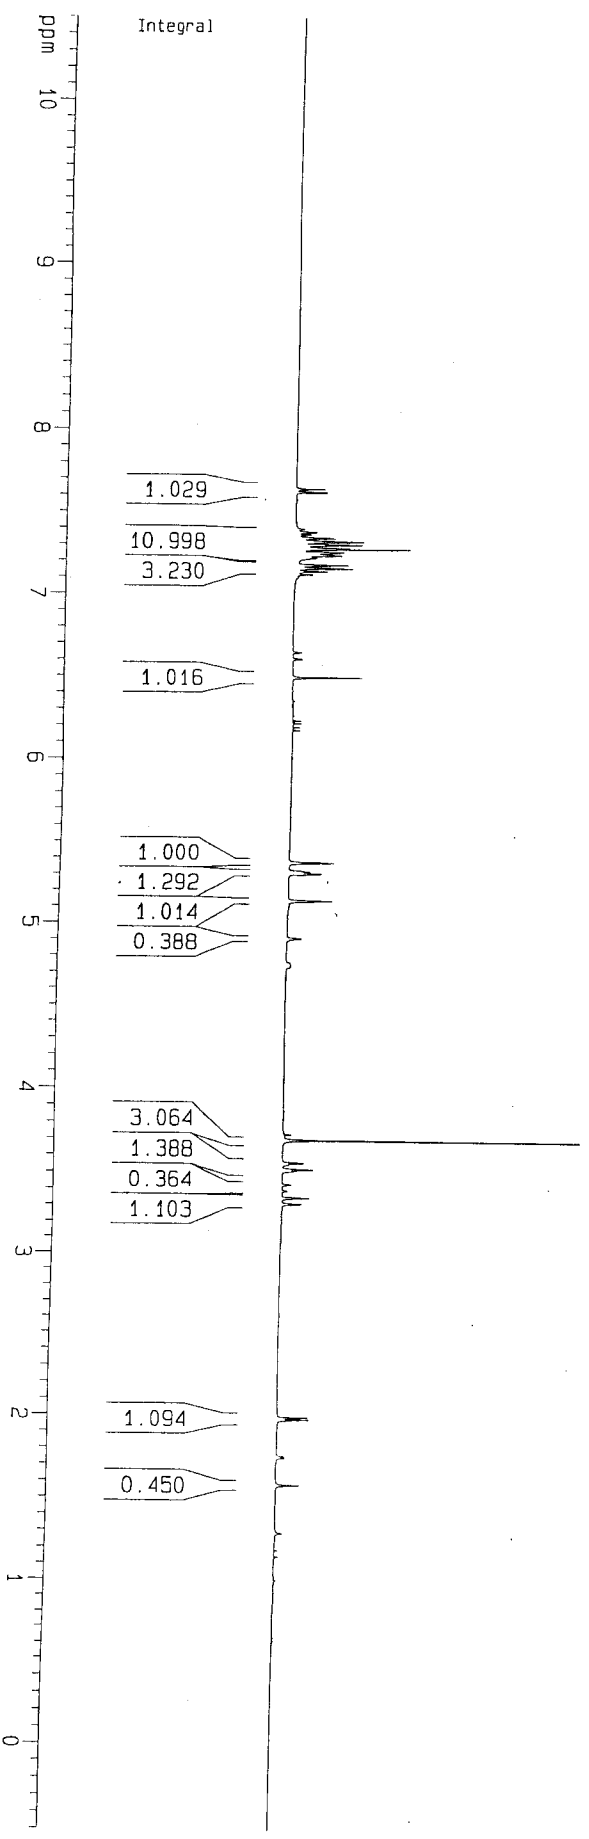

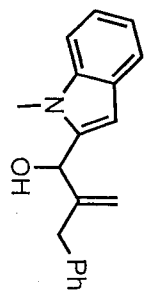

2K<sup>1</sup> (TMS group deprotected)

Current Data Parameters  
 NAME hc98-700cy19-6  
 EXPNO 2  
 PROCNO 1

F2 - Acquisition Parameters  
 Date\_ 20031212  
 Time 15:01  
 INSTRUM spect  
 PROBHD 5mm BBO 500  
 PULPROG zgpg30  
 TD 65536  
 SOLVENT CDCl3  
 NS 593  
 DS 4  
 SFO1 24875.621 Hz  
 FIDRES 0.379572 Hz  
 AQ 1.3172326 sec  
 RG 1629.5  
 DM 20.100 usec  
 DE 6.00 usec  
 TE 300.0 K  
 D1 2.0000000 sec  
 d11 0.0300000 sec  
 d12 0.0000000 sec

\*\*\*\*\* CHANNEL f1 \*\*\*\*\*  
 NUC1 13C  
 P1 15.25 usec  
 PL1 3.00 dB  
 SFO1 100.627959 MHz

\*\*\*\*\* CHANNEL f2 \*\*\*\*\*  
 CPDPRG2 waltz16  
 NUC2 1H  
 P2 107.50 usec  
 PL2 0.00 dB  
 PL13 24.00 dB  
 PL14 24.00 dB  
 SFO2 400.131800 MHz

F2 - Processing parameters  
 S1 32768  
 SF 100.612759 MHz  
 NHW 0  
 SSB 0  
 LB 1.00 Hz  
 GB 0  
 PC 1.40

10 NMR D1/D2 parameters  
 CA 24.00 cm  
 F1 220.000 ppm  
 F2 22134.80 Hz  
 F3P -10.000 ppm  
 F3 -1006.13 Hz  
 PPRCM 3833 ppm/cm  
 NZCM 964.0593 Hz/cm

- 148.669
- 139.626
- 139.078
- 138.405
- 129.426
- 129.284
- 128.766
- 128.598
- 127.277
- 126.748
- 126.529
- 126.424
- 122.042
- 120.963
- 119.725
- 113.198
- 109.320
- 101.450
  
- 77.522
- 77.204
- 76.887
- 69.611
  
- 40.225
- 30.292

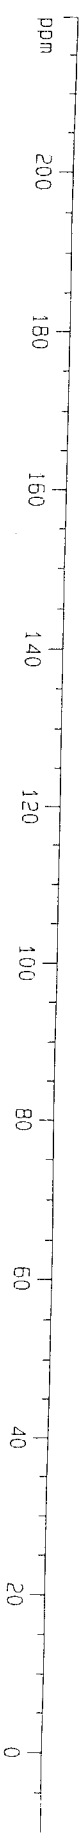

H-pdt

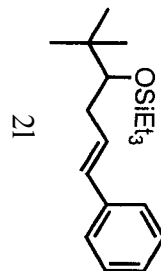

Current Data Parameters  
NAME hcs-15-hdt  
EXPNO 1  
PROCNO 1

F2 - Acquisition Parameters  
Date\_ 20060213  
Time 12:03  
INSTRUM Sma BBO BB-1  
PROBHD 4930  
PULPROG zgpg30  
TD 65536  
SOLVENT CDCl3  
NS 5  
DS 2  
SWH 8278.146 Hz  
FIDRES 0.129314 Hz  
AQ 3.9584243 sec  
RG 25.4  
DM 50.400 usec  
DE 5.00 usec  
TE 300.0 K  
D1 1.00000000 sec

\*\*\*\*\* CHANNEL f1 \*\*\*\*\*  
NUC1 1H  
P1 7.90 usec  
PL1 0.00 dB  
SFO1 400.136270 MHz

F2 - Processing parameters  
SI 32768  
SF 400.130016 MHz  
WDW EM  
SSB 0  
LB 0.30 Hz  
GB 0  
PC 1.00

ID NMR plot Parameters  
CX 24.00 cm  
FIP 10.500 DPM  
F1 4201.56 Hz  
F2 10.500 DPM  
PCWDW 6.45833 Hz/cm  
HZCN 183.38291 Hz/cm

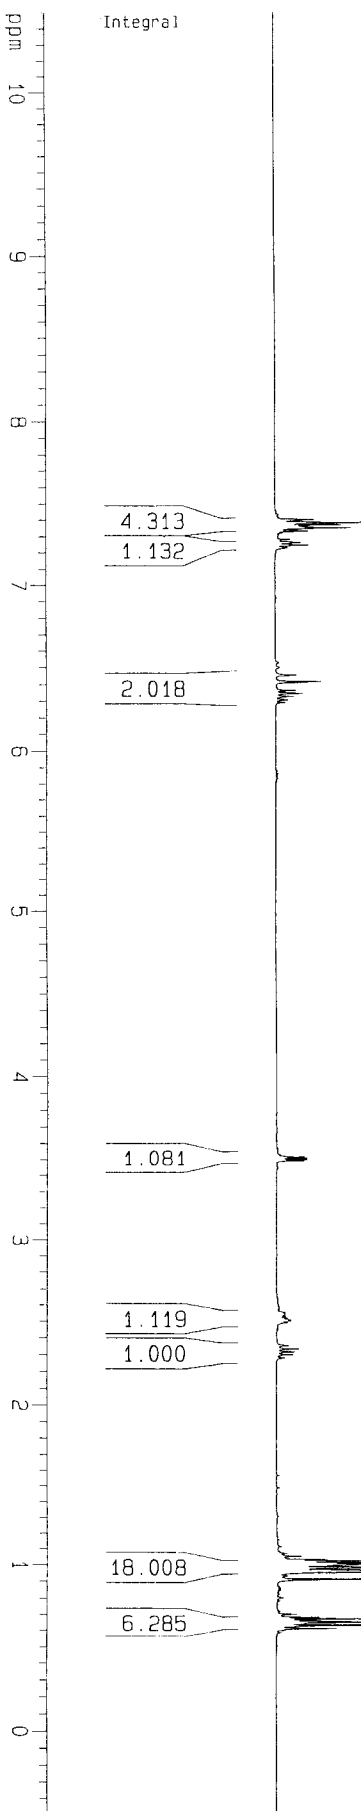

Current Data Parameters  
 NAME Rc/p-15-Hent  
 EXPGN 2  
 PROCNO 1

F2 - Acquisition Parameters  
 Date\_ 20060213  
 Time 12:07  
 INSTRUM spect  
 PROBNM Smm\_BBD\_BB-1  
 PULPROG zgpg30  
 TD 65536  
 SOLVENT CDCl3  
 NS 38  
 DS 4  
 SWH 24976.821 Hz  
 FIDRES 0.375821 Hz  
 AQ 1.317224 sec  
 RG 1024  
 DM 20.100 usec  
 DE 5.00 usec  
 TE 300.0 K  
 D1 2.0000000 sec  
 d11 0.0300000 sec  
 d12 0.0002000 sec

\*\*\*\*\* CHANNEL f1 \*\*\*\*\*  
 NUC1 13C  
 P1 15.25 usec  
 PL1 3.00 dB  
 SFO1 100.6257959 MHz

\*\*\*\*\* CHANNEL f2 \*\*\*\*\*  
 GPRPG2 waltz16  
 NUC2 1H  
 P2 107.50 usec  
 PL2 0.00 dB  
 PL12 24.00 dB  
 PL13 24.00 dB  
 SFO2 400.1316005 MHz

F2 - Processing parameters  
 SI 32768  
 SF 100.617582 MHz  
 MDK EM  
 SSB 0  
 LB 1.00 Hz  
 GB 0  
 PC 1.40

10 NMR plot parameters  
 CX 24.00 cm  
 F1P 220.000 ppm  
 F1 22134.80 Hz  
 F2P -10.000 ppm  
 F2 -1006.13 Hz  
 PRCM 9.58333 ppm/cm  
 NZCM 984.20551 Hz/cm

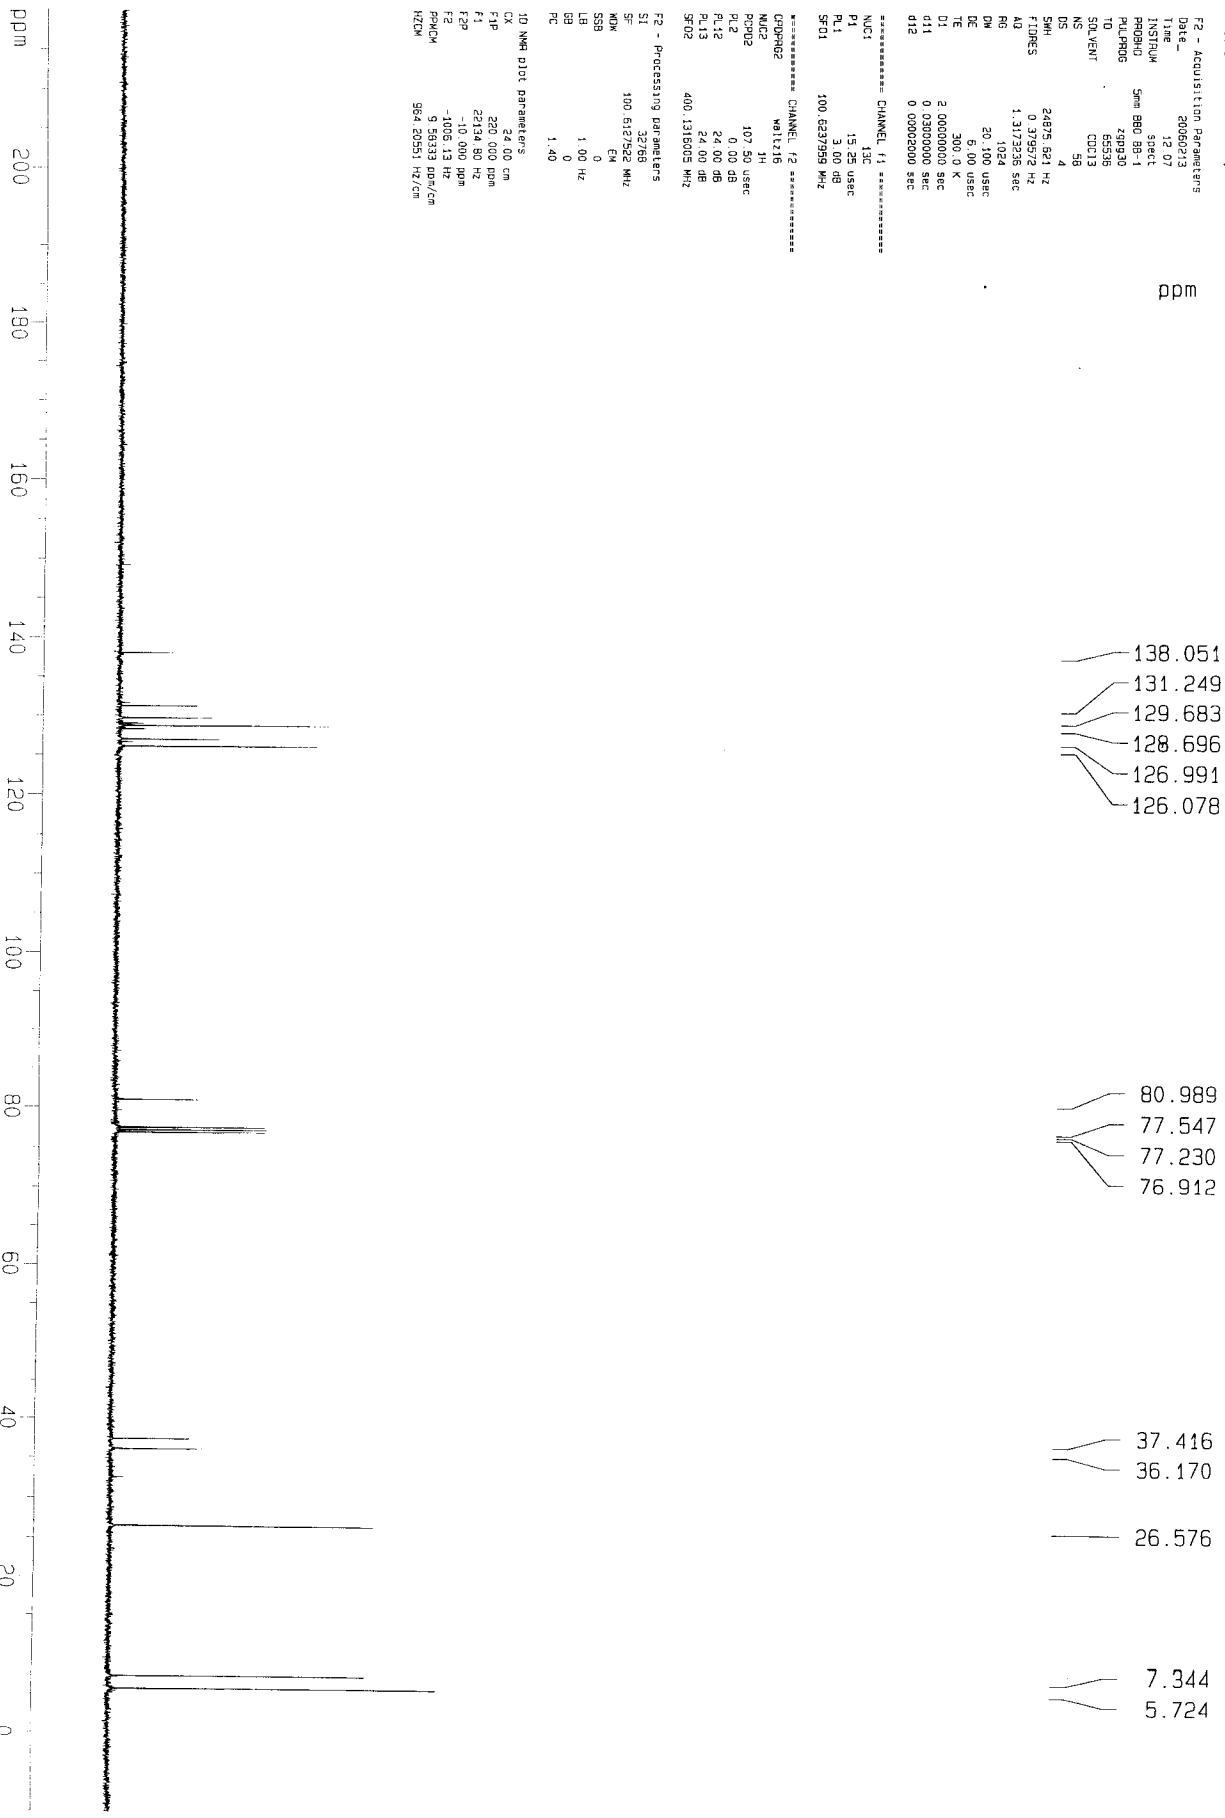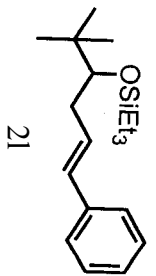

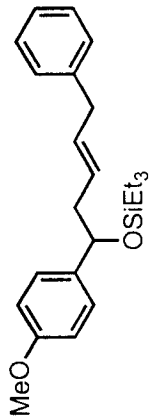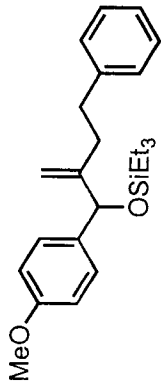

```

Current: 100.000 MHz
NAME: 100.000 MHz
EXPNO: 1
PROCNO: 1
F2 - Acquisition Parameters
Date_UTC: 20060901
Time: 12.11
INSTRUM: spect
PROBHD: 5mm BBO BB-1
PULPROG: zgpg30
TD: 65536
SOLVENT: CDCl3
NS: 7
DS: 2
SWH: 8278.146 Hz
FIDRES: 0.126314 Hz
AQ: 3.9584243 sec
RG: 40.3
AQ: 40.3
DE: 60.403 usec
TE: 300.2 K
D1: 1.00000000 sec
***** CHANNEL f1 *****
NUC1: 1H
P1: 7.50 usec
PL1: 0.00 dB
SFO1: 400.1324710 MHz
F2 - Processing parameters
SF: 400.1300019 MHz
WDW: EM
SSB: 0
LB: 0.30 Hz
GB: 0
PC: 1.00
ID: NMR plot parameters
CX: 22.50 cm
FID: 10.500 cm
F1: 4201.36 Hz
F2: -0.500 cm
F3: -250.07 Hz
PPMCK: 0.45833 ppm/cm
H2CK: 193.38591 Hz/cm
  
```

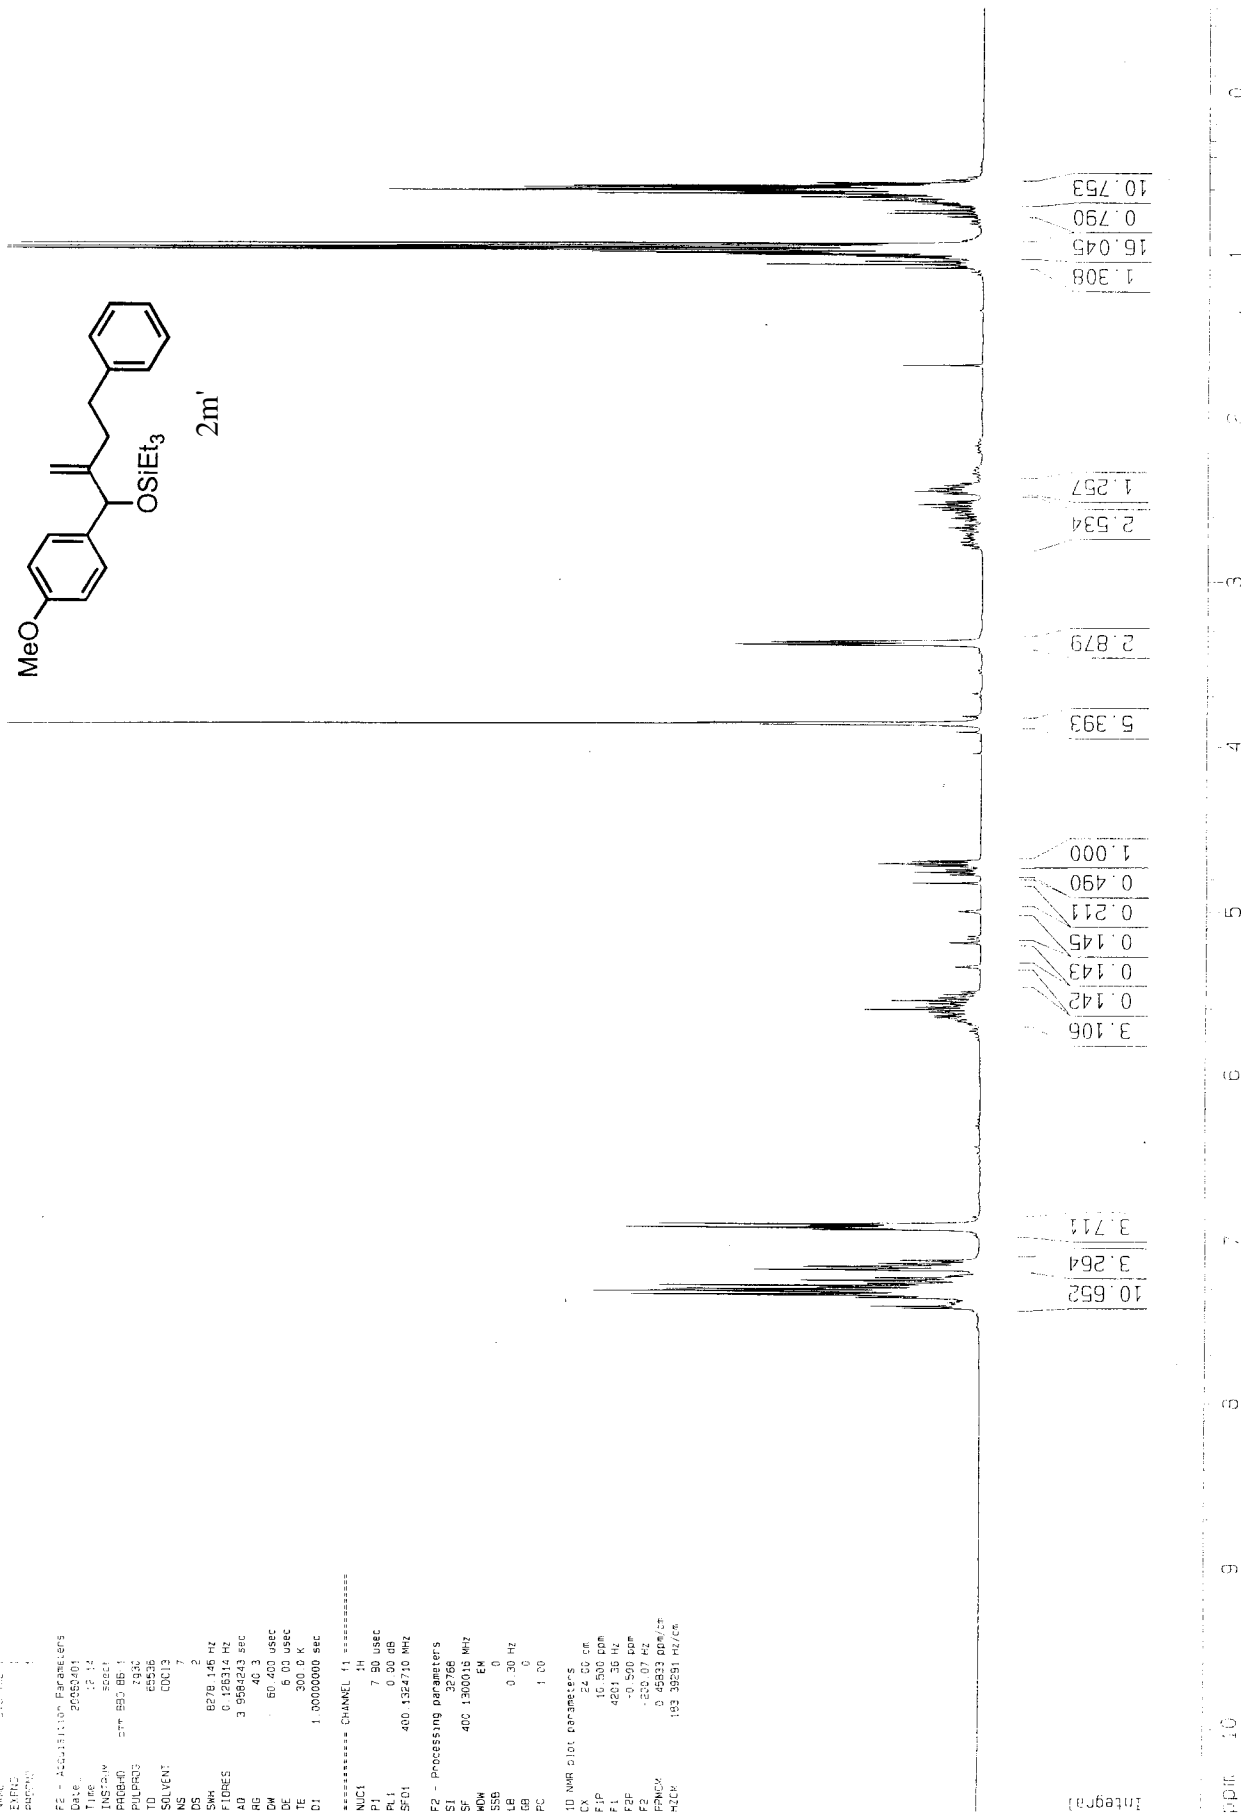



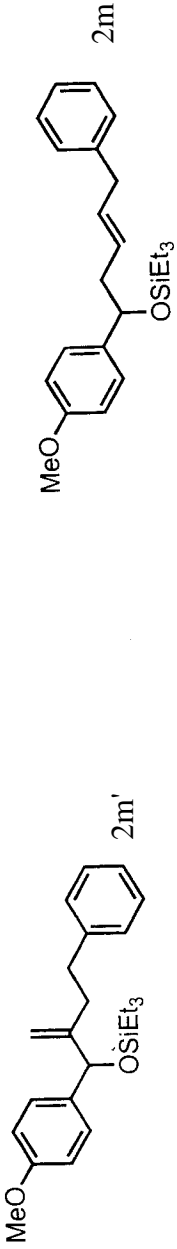

```

Current Data Parameters
NAME      TUB 45B 15B 1
EXPNO    1
PROCNO   1
Date_    20060401
Time     12.16
INSTRUM  spect
PROBHD   5mm BBO BB-1
PULPROG  zgpg30
TD       65536
SOLVENT  CDCl3
NS       169
DS       4
SWH      24875.621 Hz
FIDRES   0.375572 Hz
AQ       1.317326 sec
RG       512
DM       20.100 usec
DE       6.00 usec
TE       300.0 K
D1       2.0000000 sec
d11      0.0300000 sec
d12      0.0000000 sec

***** CHANNEL f1 *****
NUC1     13C
P1       15.25 usec
PL1      3.00 dB
SFO1     100.6227955 MHz

***** CHANNEL f2 *****
CPDPRG2  msc1216
NUC2     1H
P2       107.50 usec
PL2      0.00 dB
PL12     24.00 dB
PL13     24.00 dB
SFO2     400.1316005 MHz

F2 - Processing parameters
SI       32768
SF       100.6127890 MHz
WDW      EM
SSB      0
LB       1.00 Hz
GB       0
PC       1.40

1D NMR plot parameters
CX       24.00 cm
F1P      220.000 dB
F1       22134.80 Hz
F2P      -10.000 dB
F2       -1006.13 Hz
PC1MW    9.258335 dBm/cm
PC2MW    9.258335 dBm/cm

```

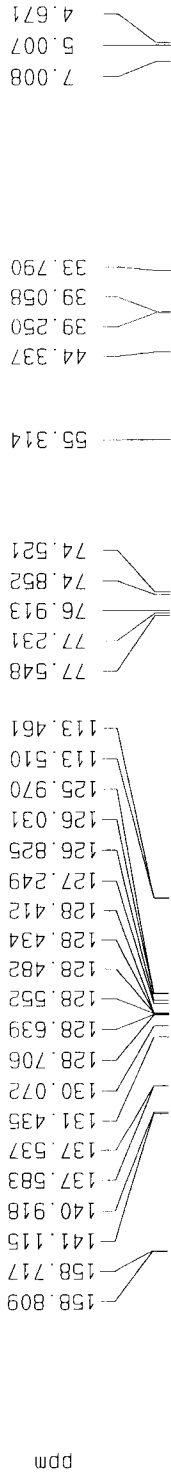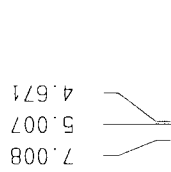

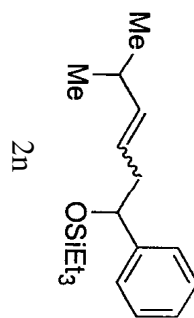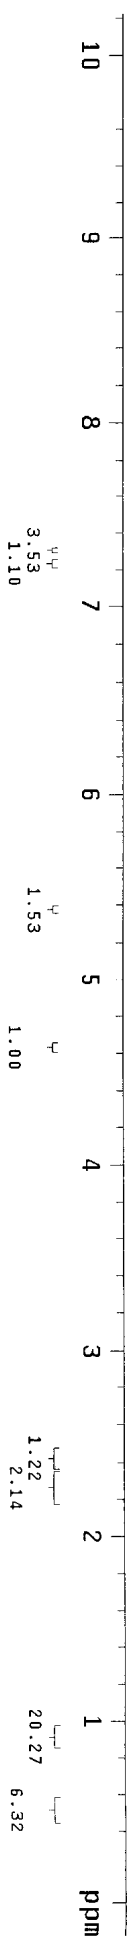

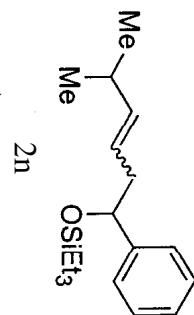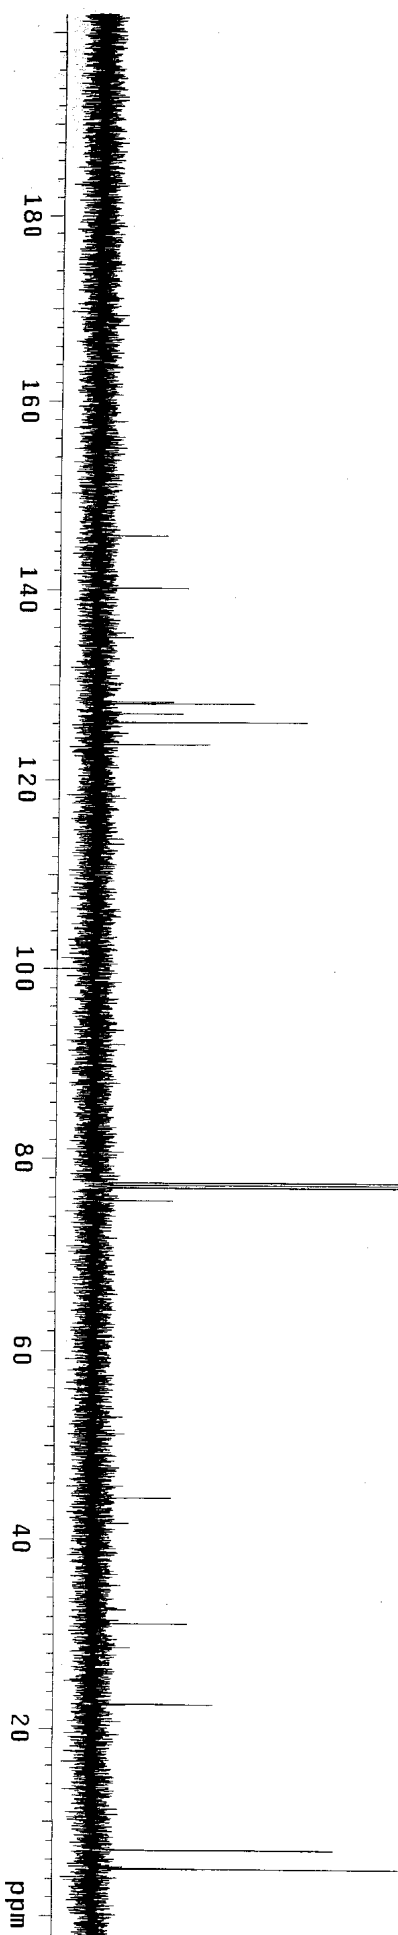

SN050726 allylic alcohol

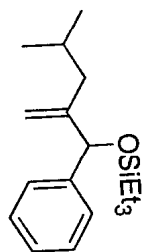

2n'

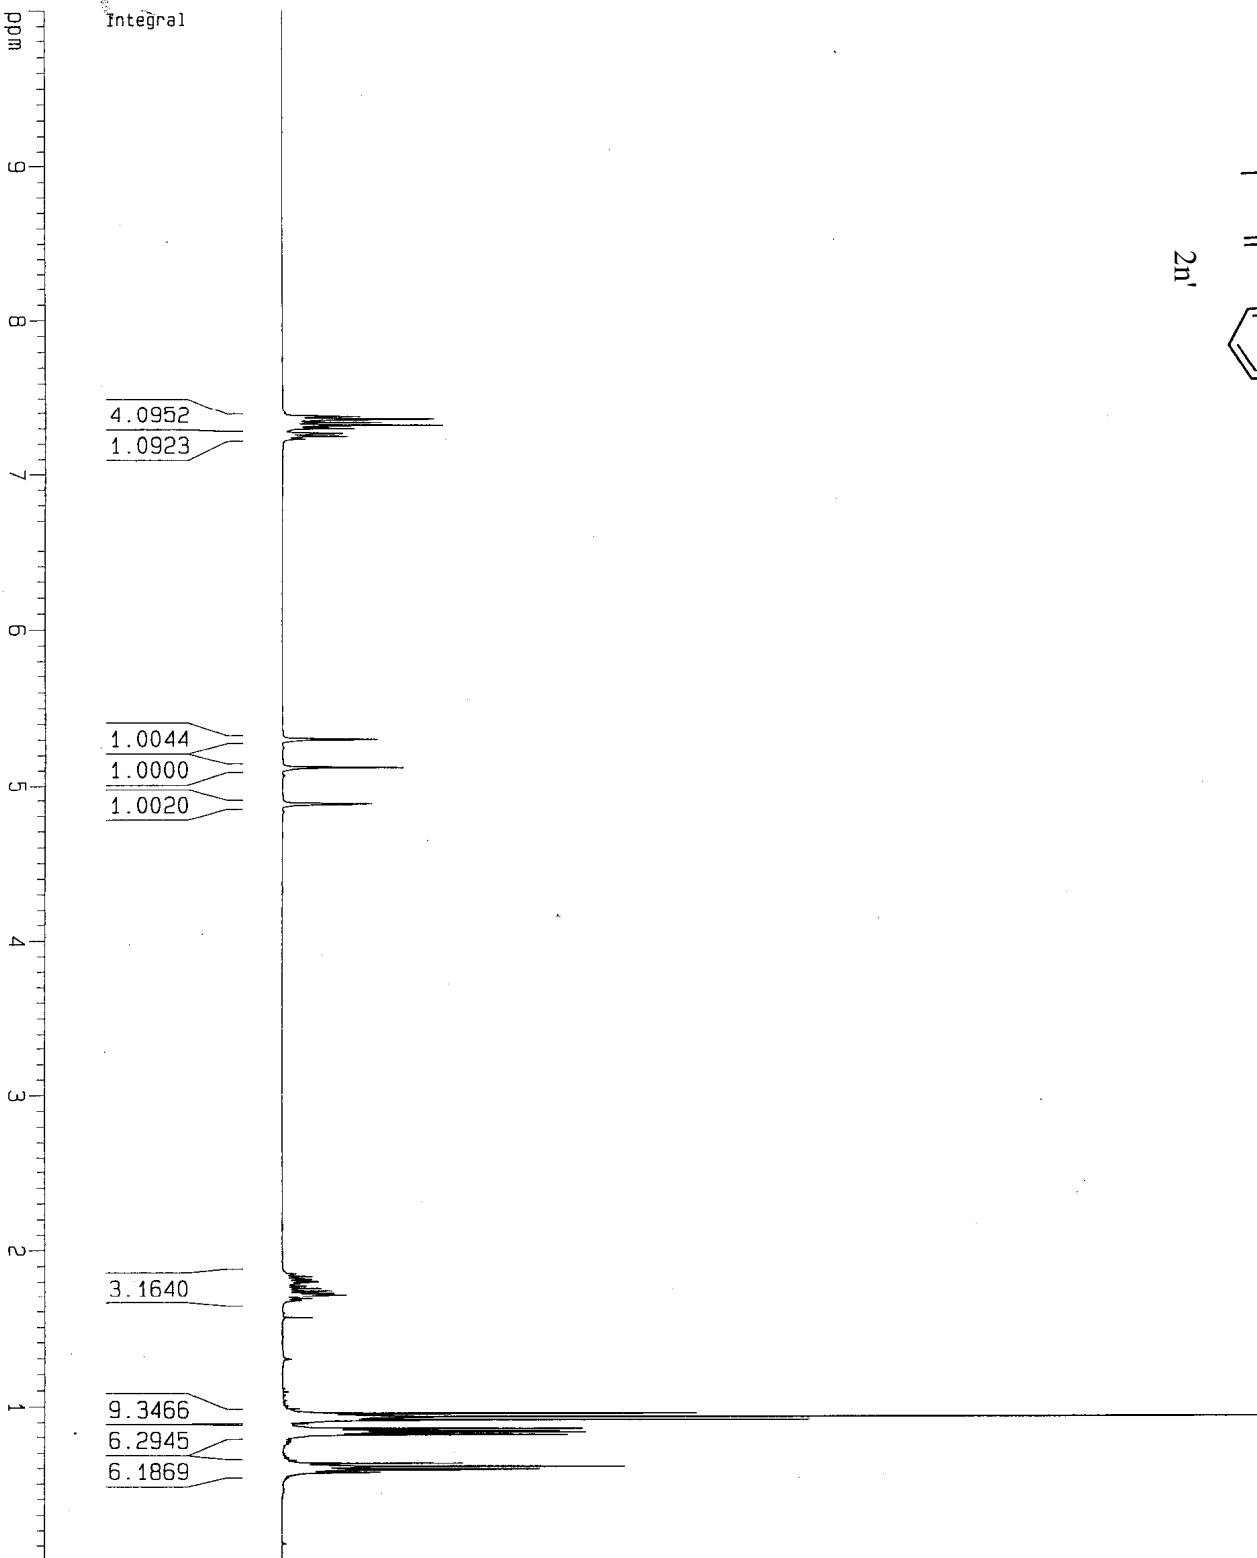

Current Data Parameters  
 NAME SN726-ally-H  
 EXPNO 1  
 PROCNO 1

F2 - Acquisition Parameters  
 Date\_ 20050722  
 Time 21:51  
 INSTRUM spect  
 PROBHD 5mm BBO BB-1  
 PULPROG zg30  
 TD 65536  
 SOLVENT CDCl3  
 NS 8  
 DS 2  
 SWH 8278.146 Hz  
 FIDRES 0.126314 Hz  
 AQ 3.9584243 sec  
 RG 32  
 DW 60.400 usec  
 DE 6.00 usec  
 TE 300.0 K  
 D1 1.00000000 sec

===== CHANNEL f1 =====  
 NUC1 1H  
 P1 7.90 usec  
 PL1 0.00 dB  
 SF01 400.1324710 MHz

F2 - Processing parameters  
 SI 32768  
 SF 400.1300056 MHz  
 MDM EM  
 SSB 0  
 LB 0.30 Hz  
 GB 0  
 PC 1.00

1D NMR plot parameters  
 CX 20.00 cm  
 F1P 10.000 ppm  
 F1 4001.30 Hz  
 F2P 0.000 ppm  
 F2 0.00 Hz  
 PPMCM 0.50000 ppm/cm  
 HZCM 200.06500 Hz/cm

SN050726 allylic alcohol

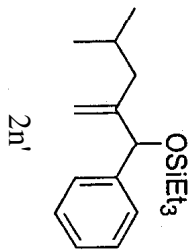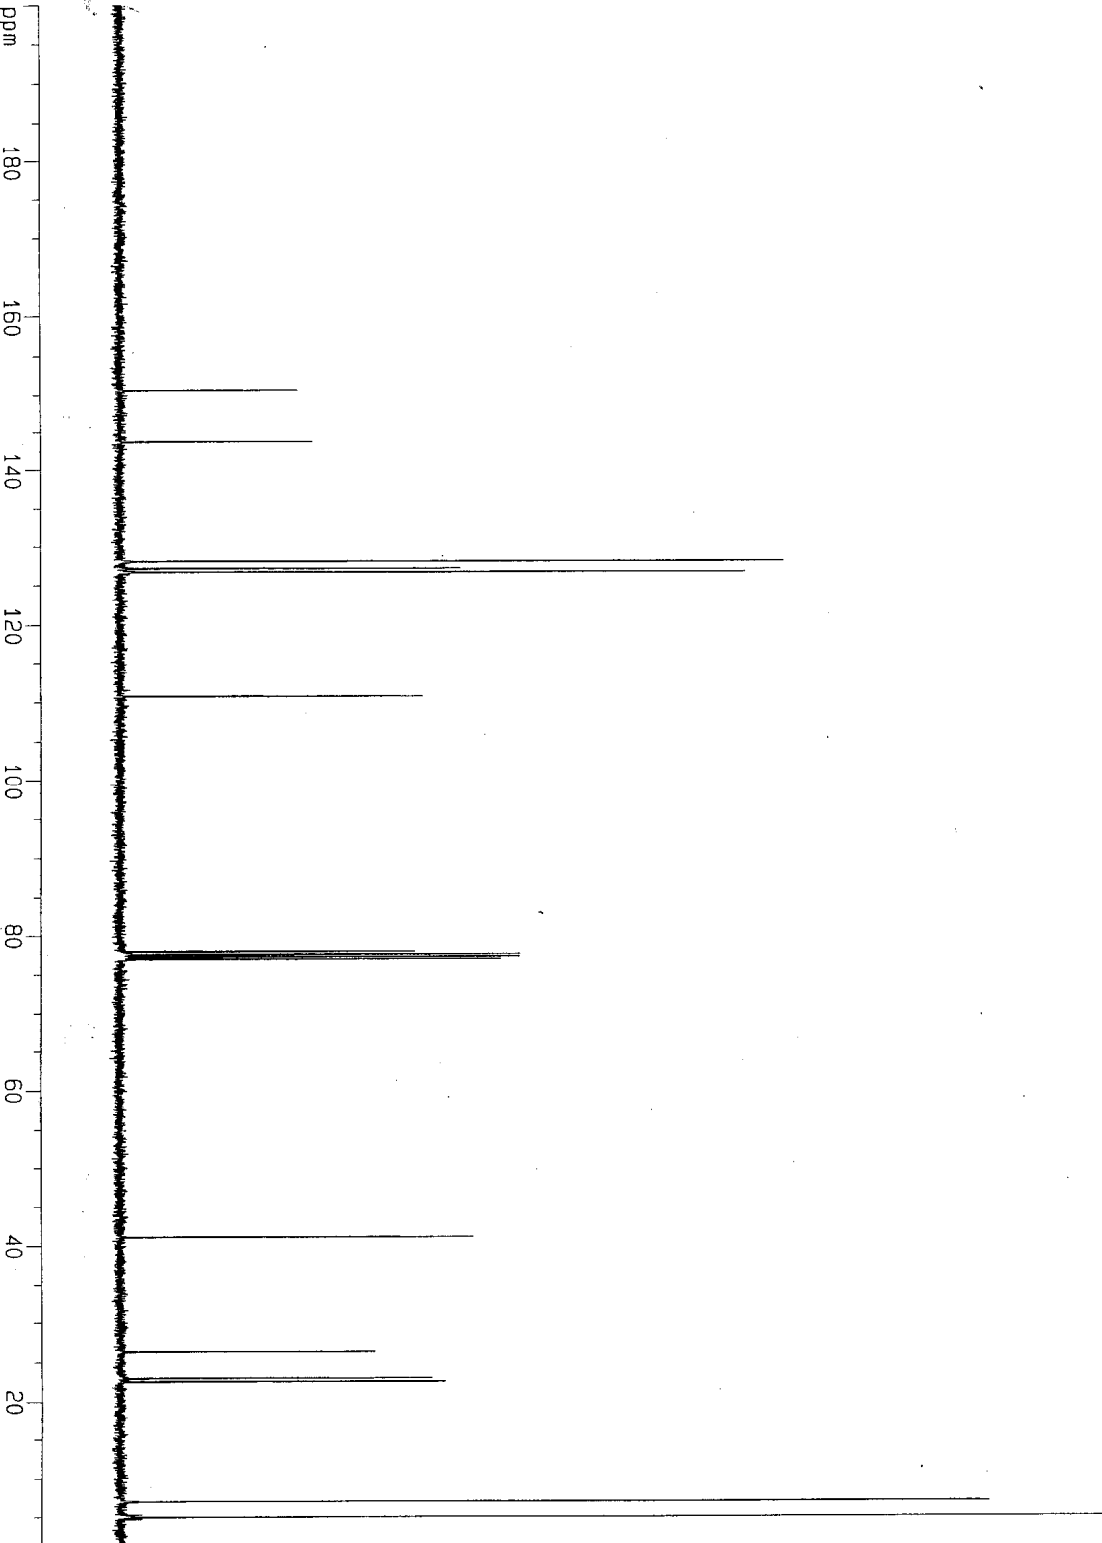

Current Data Parameters  
 NAME SN726-ajj-c  
 EXPNO 1  
 PROCNO 1

F2 - Acquisition Parameters  
 Date\_ 20050722  
 Time 21:53

INSTRUM spect  
 PROBHD 5mm BBO BB-1  
 PULPROG zgpg30  
 TD 65536  
 SOLVENT CDCl3  
 NS 159  
 DS 4

SMH 25125.629 HZ  
 FIDRES 0.383387 HZ  
 AQ 1.3042164 sec  
 RG 8192

DW 19.900 usec  
 DE 6.00 usec  
 TE 300.0 K

D1 2.00000000 sec  
 d11 0.03000000 sec  
 d12 0.00002000 sec

===== CHANNEL f1 =====  
 NUC1 13C

P1 15.25 usec  
 PL1 3.00 dB  
 SFO1 100.6237959 MHz

===== CHANNEL f2 =====  
 CPDPRG2 waltz16

NUC2 1H  
 PCPD2 107.50 usec  
 PL2 0.00 dB  
 PL12 24.00 dB  
 PL13 24.00 dB  
 SFO2 400.1315005 MHz

F2 - Processing parameters  
 SI 32768

SF 100.6127499 MHz  
 MDW EM  
 SSB 0  
 LB 1.00 Hz  
 GB 0  
 PC 1.40

1D NMR plot parameters

CX 20.00 cm  
 F1P 200.000 ppm  
 F1 20122.55 Hz  
 F2P 0.000 ppm  
 F2 0.00 Hz  
 PPKCM 10.00000 ppm/cm  
 HZCW 1006.12744 Hz/cm

NY-8-90

20

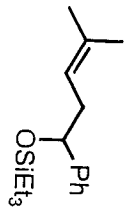

Current Data Parameters  
 NAME ncy8-90mg  
 EXPNO 1  
 PROCNO 1

F2 - Acquisition Parameters  
 Date\_ 20080113  
 Time 12 01  
 INSTRM spect  
 PROBRG Sma 890 BR-1  
 PULPROG zgpg  
 TO 54.90  
 SOLVENT CDCl3  
 NS 8  
 DS 2  
 SWH 8278.146 Hz  
 FIDRES 0.126314 Hz  
 AQ 3.5984243 sec  
 RG 14.3  
 DW 60.400 usec  
 DE 5.00 usec  
 TE 300.0 K  
 D1 1.00000000 sec

\*\*\*\*\* CHANNEL f1 \*\*\*\*\*  
 NUC1 1H  
 P1 7.00 usec  
 PL1 0.20 dB  
 SFO1 400.1324710 MHz

F2 - Processing parameters  
 SI 32768  
 SF 400.1300015 MHz  
 NQ 1  
 EM 0  
 SS 0  
 LB 0.30 Hz  
 GB 0  
 PC 1.00

1D NMR 01st Parameters  
 CX 24.000 cm  
 F1P 14.500 ppm  
 F1 4201.36 Hz  
 F2p -200.07 Hz  
 F2 0.45833 ppm/cm  
 HZCM 183.39291 Hz/cm

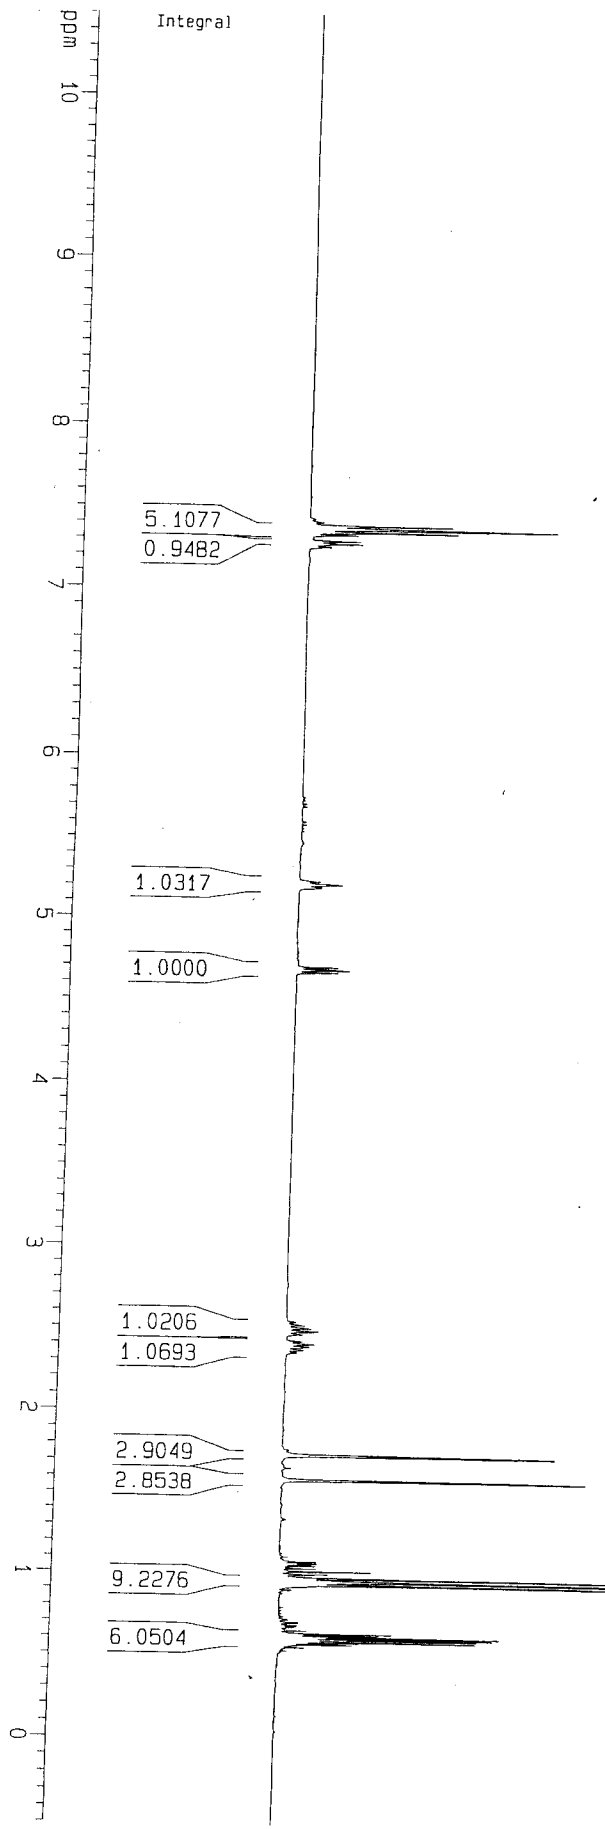

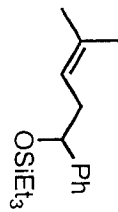

20

Current Data Parameters  
 NAME: hcyB50pmo  
 EXPNO: 2  
 PROCNO: 1

F2 - Acquisition Parameters  
 Date\_: 20060113  
 Time: 12.04  
 INSTRUM: spect  
 PROBRD: 5mm BB0 BB-1  
 PULPROG: zgpg30  
 TD: 65536  
 SOLVENT: CDCl3  
 NS: 151  
 DS: 4  
 SWH: 24875.621 Hz  
 FIDRES: 0.376972 Hz  
 AQ: 1.3173236 sec  
 RG: 1024  
 DW: 20.100 usec  
 DE: 6.00 usec  
 TE: 309.0 K  
 D1: 2.00000000 sec  
 d11: 0.03000000 sec  
 d12: 0.00002000 sec

\*\*\*\*\* CHANNEL f1 \*\*\*\*\*  
 NUC1: <sup>13</sup>C  
 P1: 15.26 usec  
 PL1: 3.00 dB  
 SF01: 100.6237599 MHz

\*\*\*\*\* CHANNEL f2 \*\*\*\*\*  
 CPDPRG2: waltz16  
 NUC2: <sup>1</sup>H  
 P2: 107.50 usec  
 PL2: 0.00 dB  
 PL12: 24.00 dB  
 PL13: 24.00 dB  
 SF02: 400.1316005 MHz

F2 - Processing parameters  
 SI: 32768  
 SF: 100.6127529 MHz  
 MW: 64  
 SSB: 0  
 LB: 1.00 Hz  
 GB: 0  
 PC: 1.40

D0 NMR plot parameters  
 CA: 24.00 cm  
 FAP: 220.000 ppm  
 F1: 22134.80 Hz  
 F2: -1005.72 Hz  
 PPM0: 9.58333 ppm/cm  
 HZ0: 964.20551 Hz/cm

- 145.817
- 133.554
- 128.093
- 127.021
- 126.111
- 121.036
- 77.561
- 77.244
- 76.926
- 75.366
- 39.980
- 25.972
- 18.008
- 6.965
- 5.028

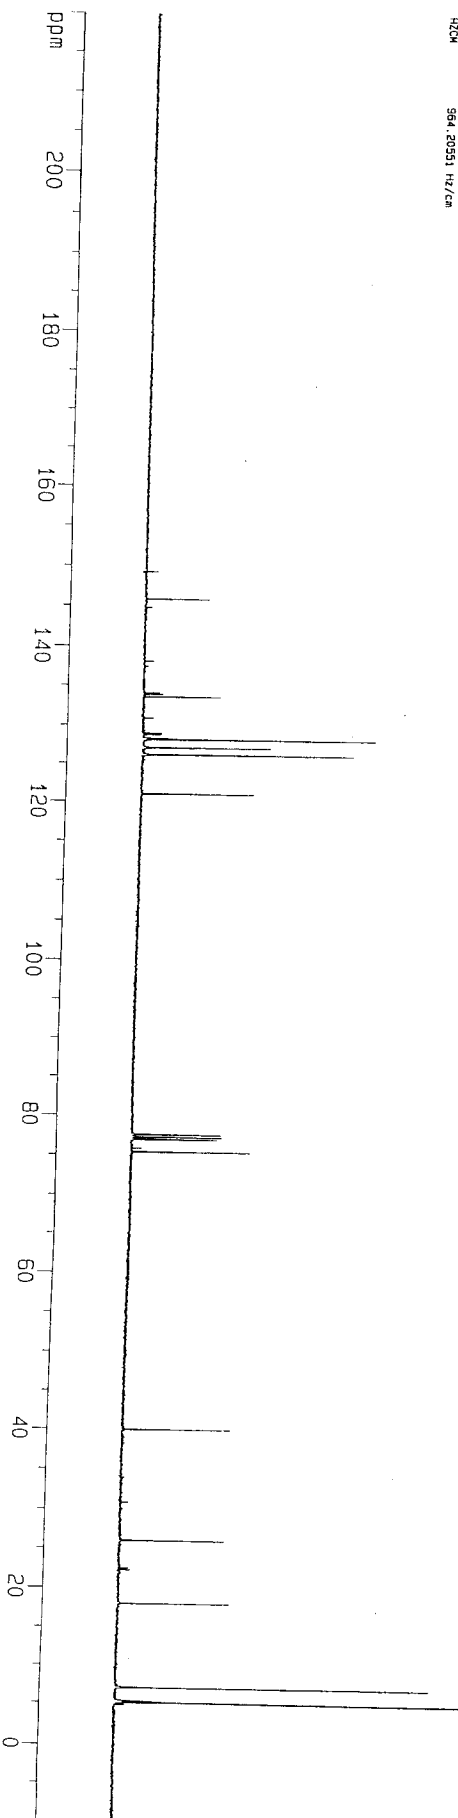

120

Current Data Parameters  
 NAME: HCV9-B2BET  
 EXPNO: 1  
 PROCNO: 1

F2 - Acquisition Parameters  
 Date\_: 20080104  
 Time: 17.00  
 INSTRUM: spect  
 PROBRD: 5mm BBO BB-1  
 PULPROG: zgpg30  
 TD: 65536  
 SFO1: 400.1324710 MHz  
 SOLVENT: CDCl3  
 NS: 2  
 DS: 2  
 SWH: 8278.146 Hz  
 FIDRES: 0.128314 Hz  
 AQ: 3.9584243 sec  
 RG: 15  
 DM: 60.400 usec  
 DE: 5.00 usec  
 TE: 300.0 K  
 D1: 1.00000000 sec

\*\*\*\*\* CHANNEL f1 \*\*\*\*\*  
 NUCL1: 13  
 P1: 7.50 usec  
 PL1: 0.00 dB  
 SFO1: 400.1324710 MHz

F2 - Processing parameters  
 SI: 32768  
 SF: 400.130018 MHz  
 MDW: EN  
 SSB: 0  
 LB: 0.30 Hz  
 GB: 0  
 PC: 1.00

1D NMR plot parameters  
 CX: 4.00 cm  
 F1P: 1.00000000  
 F3: 420.1324710 MHz  
 FFP: -0.50000000  
 F2: -200.07 Hz  
 FPMCN: 0.45833000/cm  
 HZCN: 183.39291 Hz/cm

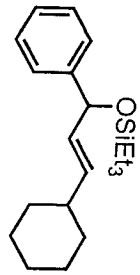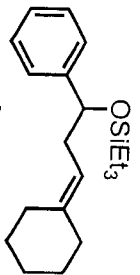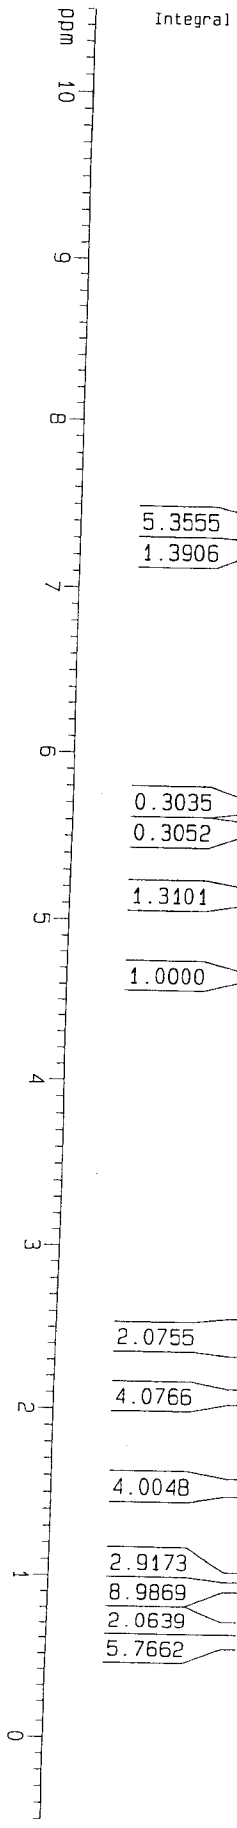



Current Data Parameters  
 NAME ncis-8512  
 EXPNO 2  
 PROCNO 1

F2 - Acquisition Parameters  
 Date\_ 20080104  
 Time 17.03  
 INSTRUM spect  
 PROBR0 5mm BBO BB-1  
 PULPROG zgpg30  
 CH1 95536  
 SOLVENT CDCl3  
 NS 512  
 DS 4  
 SWH 24875.631 Hz  
 FIDRES 0.37857 Hz  
 AQ 1.317235 sec  
 RB 1024  
 DM 20.100 usec  
 DE 6.00 usec  
 TE 300.0 K  
 D1 2.00000000 sec  
 d12 0.03000000 sec  
 d12 0.00000000 sec

\*\*\*\*\* CHANNEL f1 \*\*\*\*\*  
 NUCl1 13C  
 P1 19.23 usec  
 PL1 0.00 dB  
 SFO1 100.627359 MHz

\*\*\*\*\* CHANNEL f2 \*\*\*\*\*  
 CDPORG2 water16  
 MUC2 HI  
 PCPD2 107.50 usec  
 RL2 0.00 dB  
 RL12 24.00 dB  
 RL13 24.00 dB  
 SF02 400.1318005 MHz

F2 - Processing parameters  
 SI 32768  
 SF 100.617562 MHz  
 KW 64  
 SSB 0  
 LB 1.00 Hz  
 GB 0  
 PC 1.40

1D NMR plot parameters  
 F1P 24.00 cm  
 F1 250.000 ppm  
 F2P 23134.50 Hz  
 F2 100.000 ppm  
 PPMCH -1005.1 Hz  
 HZCH 9.408213 ppm/cm  
 964.20551 Hz/cm

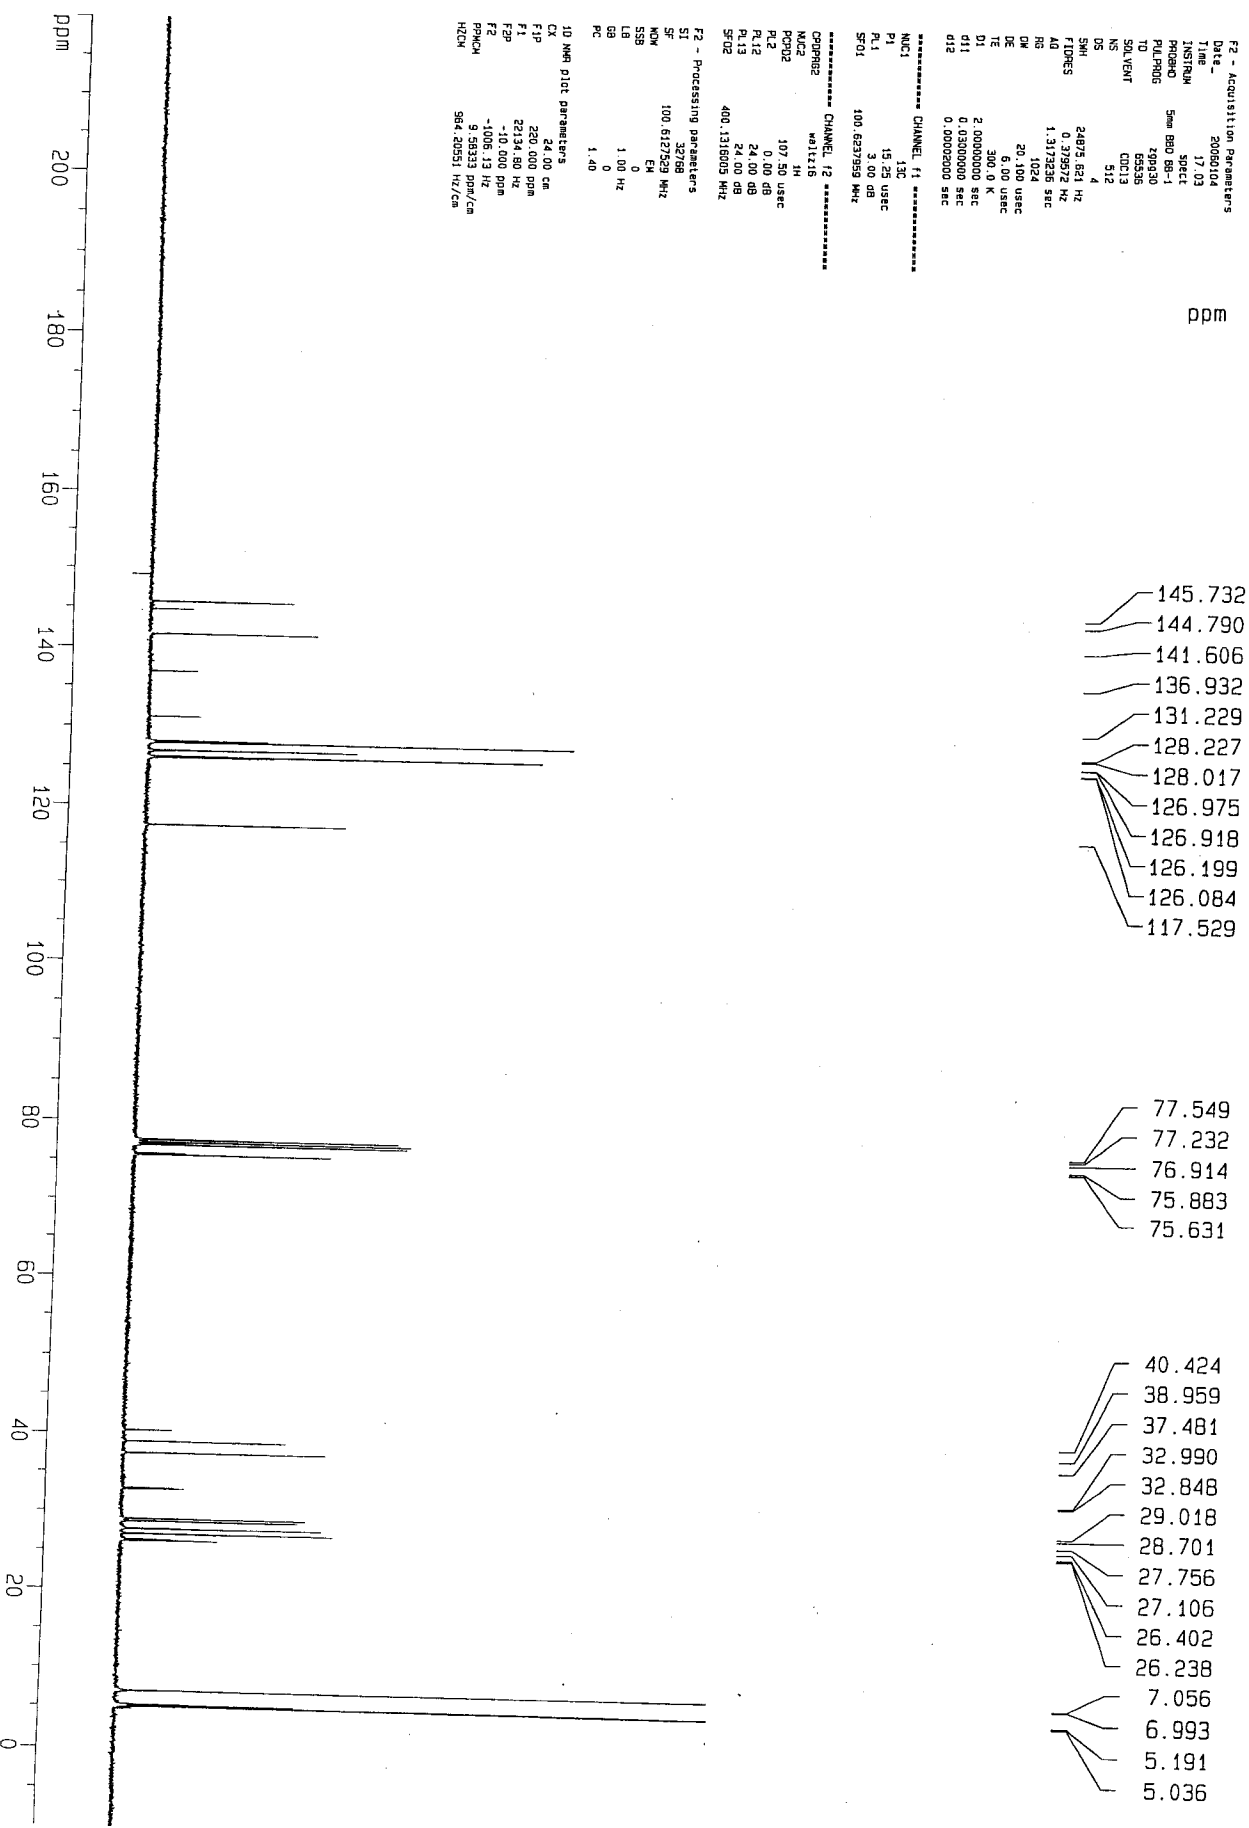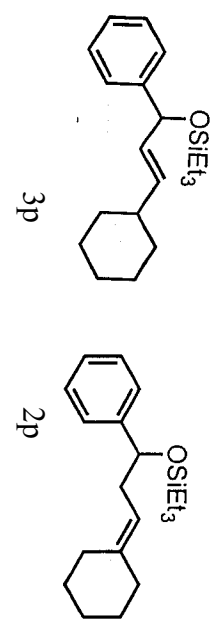

SN061114 allylic

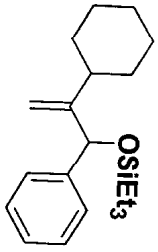

2p'

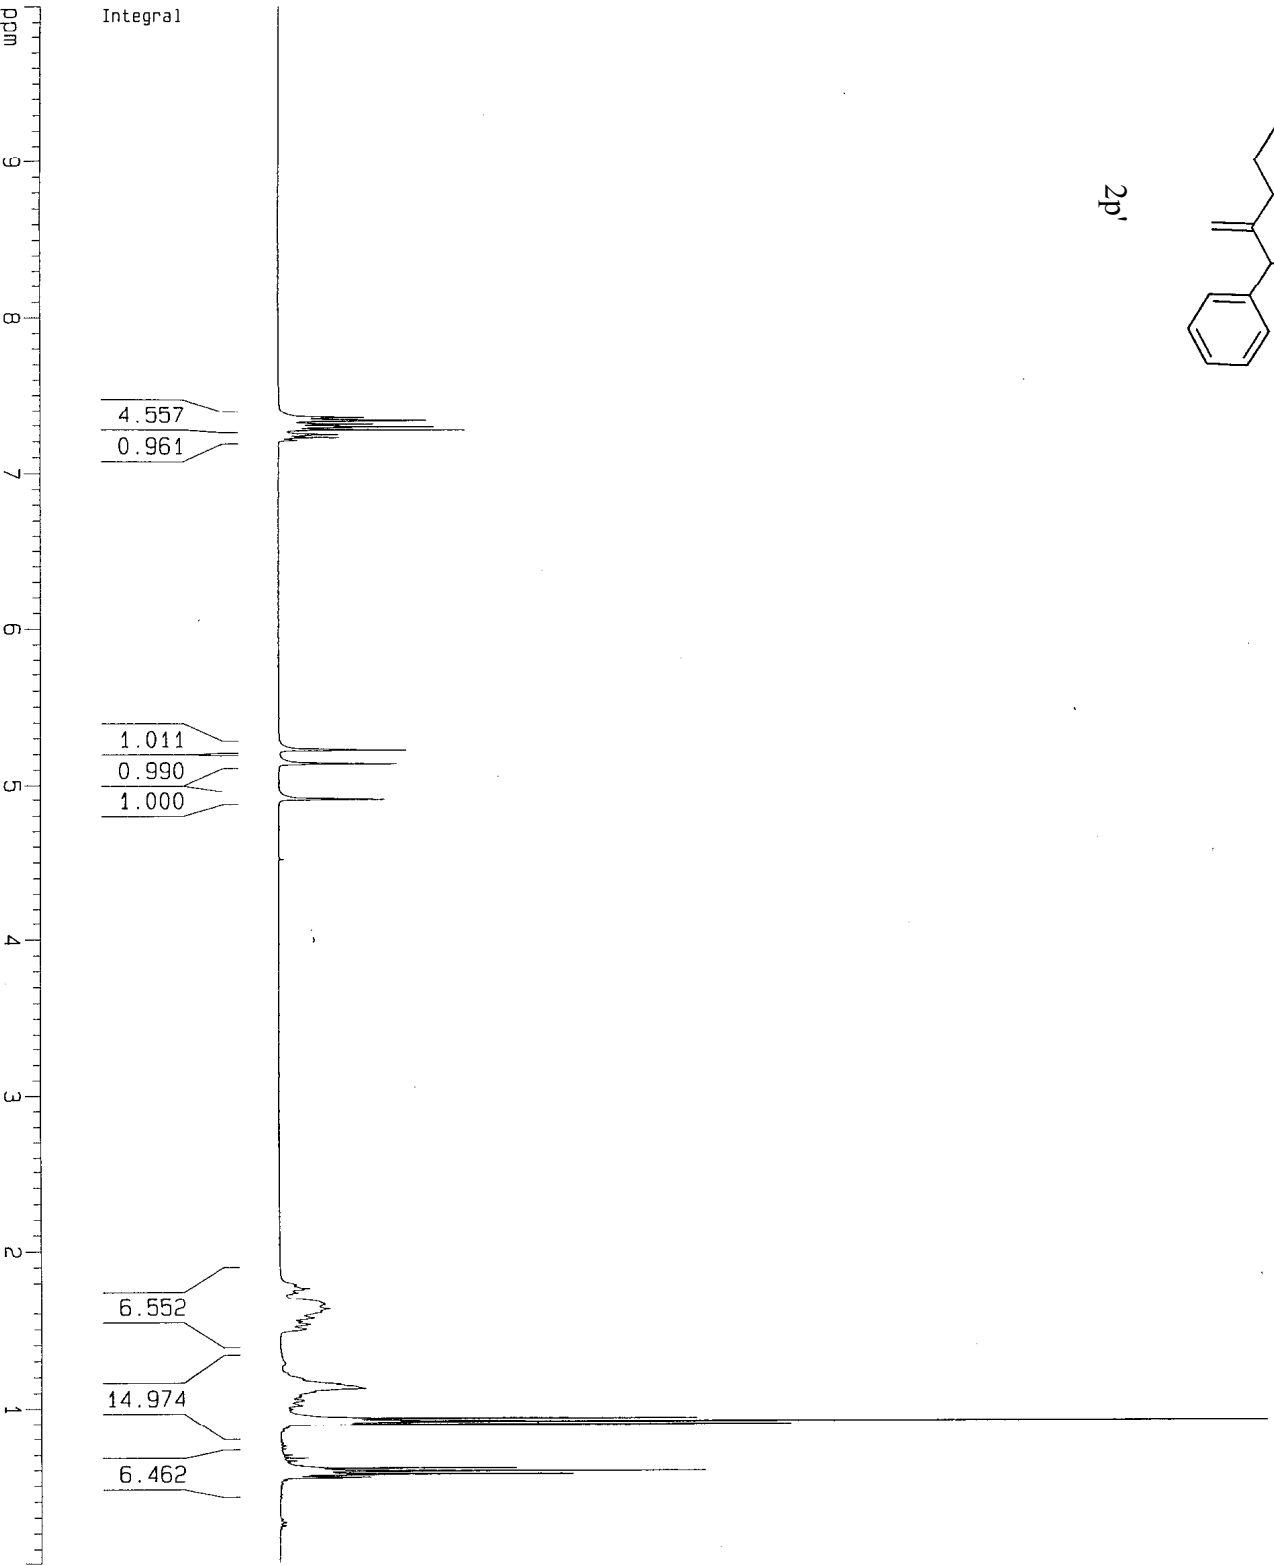

Current Data Parameters  
NAME SN1114A-H  
EXPNO 1  
PROCNO 1

F2 - Acquisition Parameters

Date\_ 20060321  
Time 16:57  
INSTRUM spect  
PROBHD 5 mm GNP 1H/1  
PULPROG zg30  
TD 65536  
SOLVENT CDCl3  
NS 8  
DS 2  
SWH 8278.146 Hz  
FIDRES 0.126314 Hz  
AQ 3.9584243 sec  
RG 256  
DE 60.400  
TE 299.1

D1 1.00000000  
MCREST 0.00000000 sec  
MCWPK 0.01500000 sec

===== CHANNEL f1 =====

NUC1 1H  
P1 9.88 usec  
PL1 3.00 dB  
SF01 400.1382710 MHz

F2 - Processing parameters

SI 32768  
SF 400.1300054 MHz  
WDW EM  
SSB 0  
LB 0.30 Hz  
GB 0  
PC 1.00

1D NMR plot parameters  
CX 20.00 cm  
CY 12.50 cm  
F1P 10.000 ppm  
F1 4001.30 Hz  
F2P 0.000 ppm  
F2 0.00 Hz  
PPKCM 0.50000 ppm/cm  
HZCM 200.06500 Hz/cm

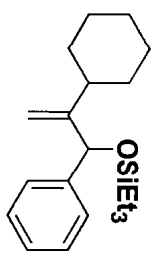

2p'

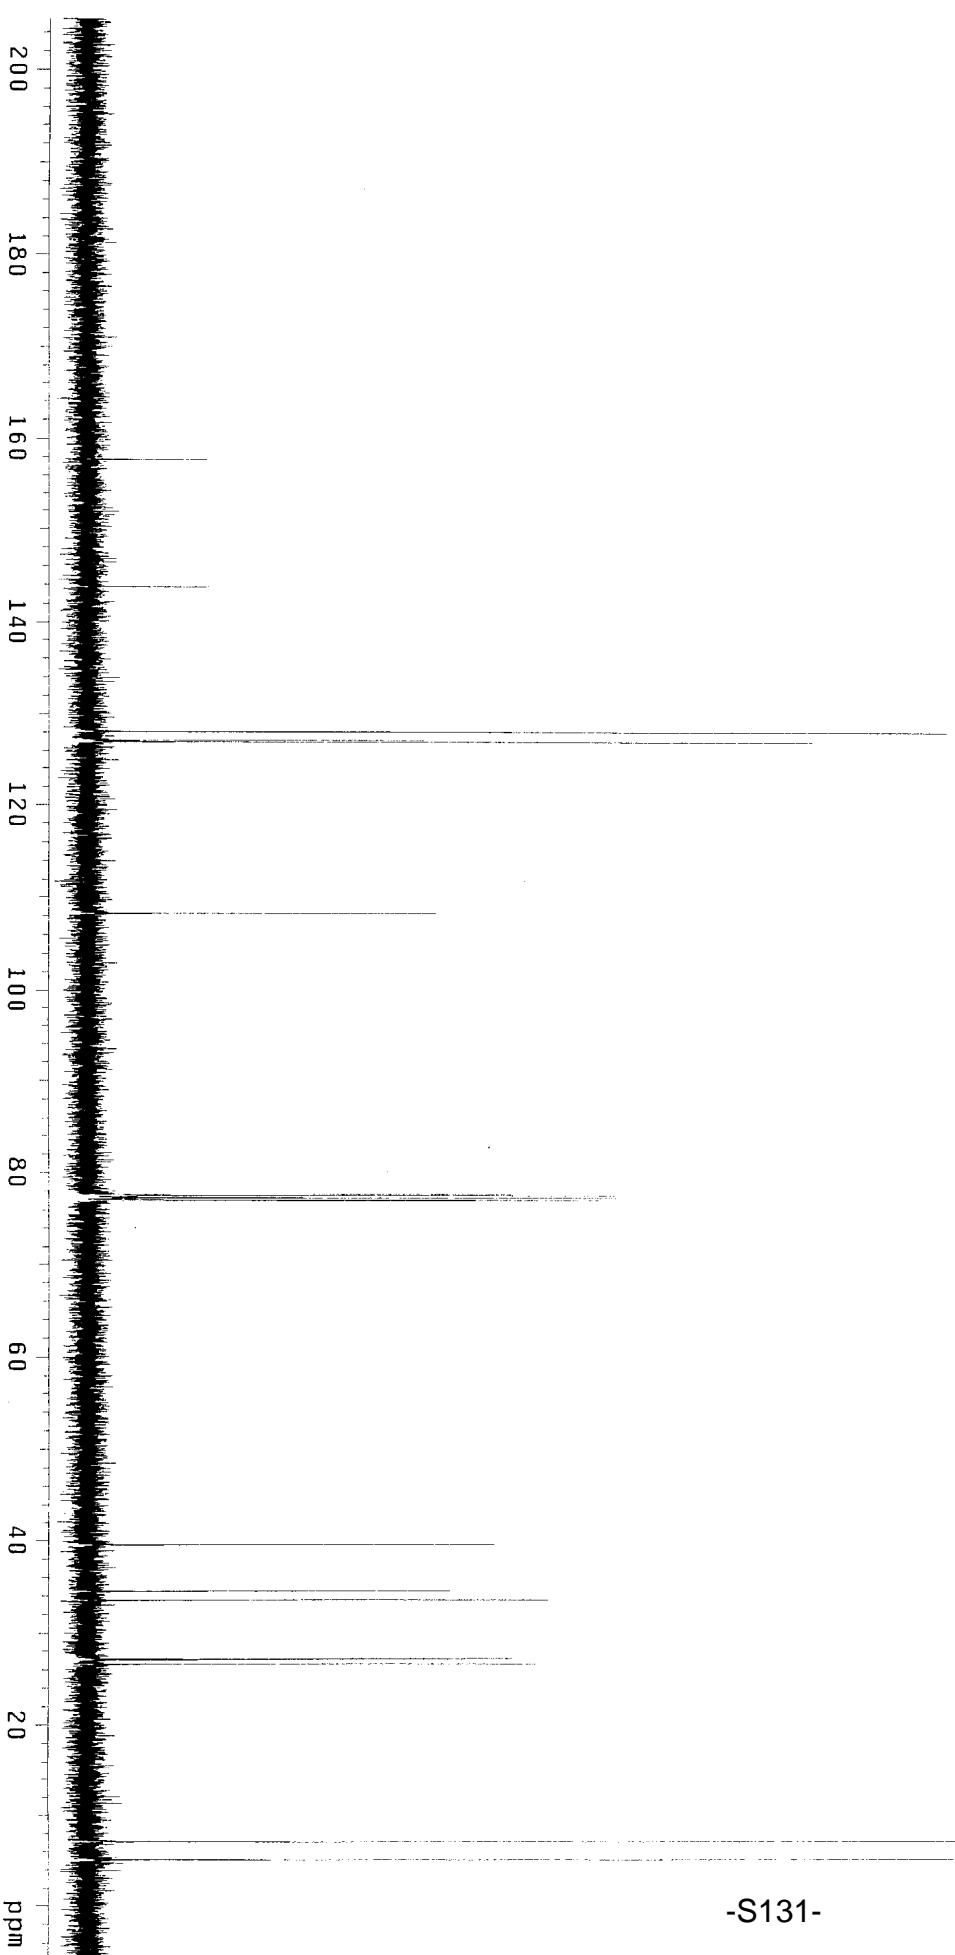

tBu-vinyl, TES deprotection

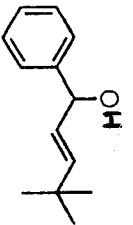

3q (TES group deprotected)

Current Data Parameters  
NAME: NEV61006  
EXPNO: 1  
PROCNO: 1

F2 - Acquisition Parameters  
Date\_ : 20081114  
Time : 11:11:34  
INSTRUM : spect  
PROBHD : Sm 800 BB-1  
PULPROG : zg30  
TD : 65536  
SOLVENT : DMS-D6  
NS : 3  
DSH : 2  
SWH : 9378.148 Hz  
FIDRES : 0.17031 Hz  
AQ : 3.998243 sec  
RG : 143.7  
DN : 50.400 uSAC  
DE : 6.00 uSAC  
TE : 300.0 K  
D1 : 1.00000000 sec

----- Channel f1 -----  
NUC1 : 13C  
P1 : 7.00 uSAC  
PL1 : 0.00 dB  
SFO1 : 400.1264710 MHz

F2 - Processing parameters  
SI : 32768  
SF : 400.1300018 MHz  
WDW : EM  
SSB : 0  
LB : 0.30 Hz  
GB : 0  
PC : 1.00

1D FID plot parameters  
SI : 32768  
SF : 400.1300018 MHz  
WDW : EM  
SSB : 0  
LB : 0.30 Hz  
GB : 0  
PC : 1.00

F1 : 24.00 cm  
F2 : 1.00000000  
F3 : 4801.36 Hz  
F4 : -0.500 uSAC  
F5 : -200.07 Hz  
PRNCH : 0.45633 ppm/cm  
MCOM : 183.39251 Hz/cm

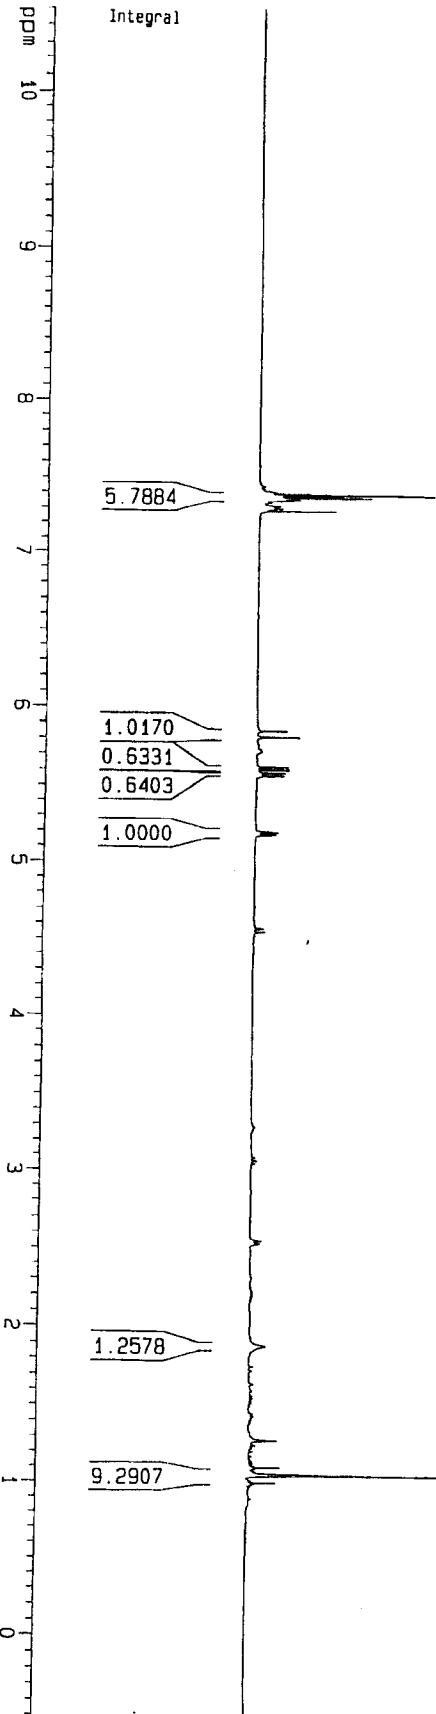

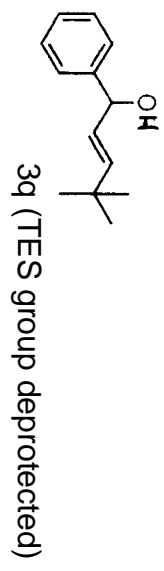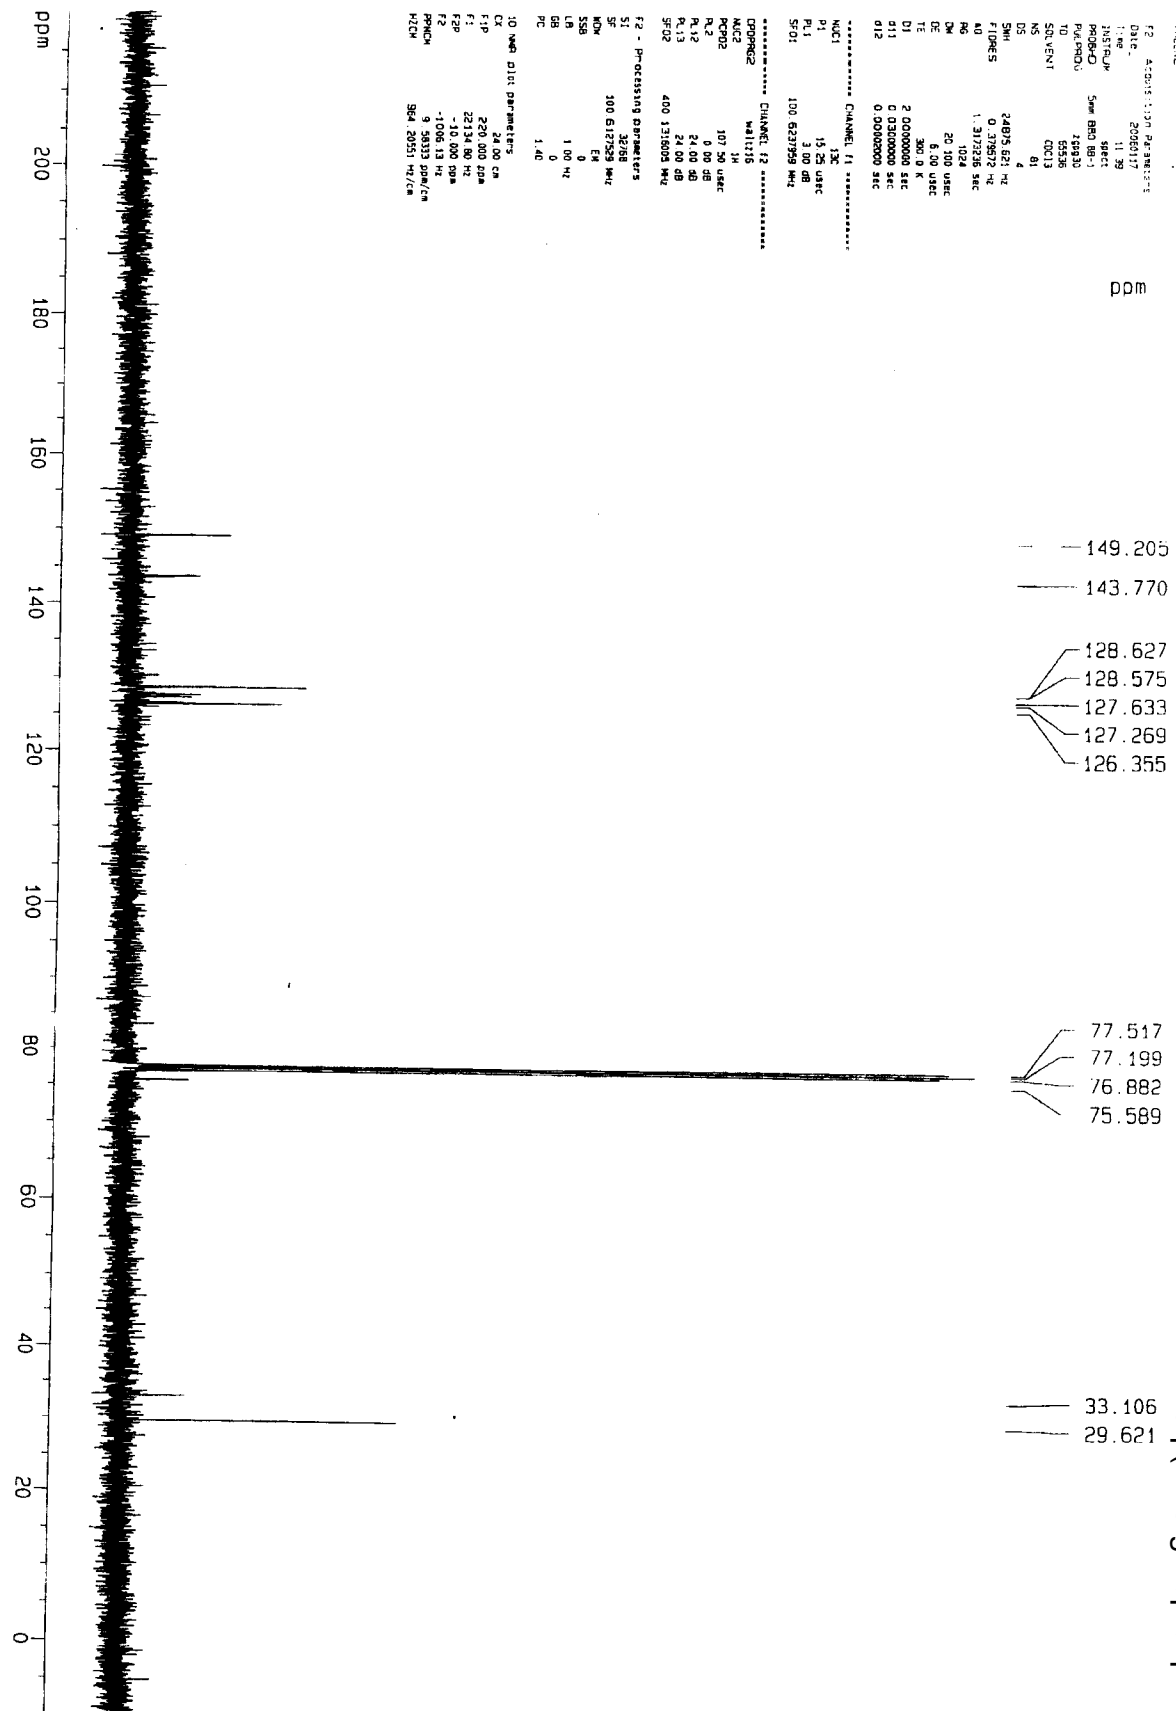

Current: 0.19 Parameters  
 Name: noyb 3000  
 EPRNO: 2  
 PROCNO: 1  
 F2 - Acq: 1:130 Parameters  
 Date\_: 200112  
 Time: 01:12  
 INSTRUM: spect  
 PROBHD: 5mm BBO BB-1  
 PULPROG: zgpg30  
 TD: 26830  
 SFO1: 503.21  
 SOLVENT: DMS-D6  
 NS: 61  
 DS: 4  
 SWH: 24876.575 Hz  
 FIDRES: 0.378671 Hz  
 AQ: 1.3172226 sec  
 RG: 1024  
 DM: 20.100 usec  
 DE: 6.00 usec  
 TE: 300.2 K  
 D1: 2.0000000 sec  
 d11: 0.0300000 sec  
 d12: 0.0000000 sec  
 \*\*\*\*\* CHANNEL f1 \*\*\*\*\*  
 NUC1 13C  
 P1 15.25 usec  
 PL1 3.00 dB  
 SFO1 100.6277959 MHz  
 \*\*\*\*\* CHANNEL f2 \*\*\*\*\*  
 CONPRG2 waltz16  
 NUC2 13C  
 PERD2 107.50 usec  
 PC2 0.00 dB  
 PL12 24.00 dB  
 PL13 24.00 dB  
 SFO2 400.1316004 MHz  
 F2 - Processing Parameters  
 SI 32768  
 SF 100.6127258 MHz  
 MDX EM  
 SSB 0  
 LB 1.00 MHz  
 GB 0  
 PC 1.40  
 ID: NMR Data Parameters  
 CX 24.00 cm  
 FIP 220.000 20A  
 F1 22134.80 Hz  
 F2P -10.000 50A  
 F2 -1006.13 Hz  
 PRNCH 9 58333 20W/cm  
 RICH 384.20551 Hz/cm

SN050835 allylic

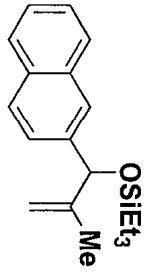

2<sup>1</sup>

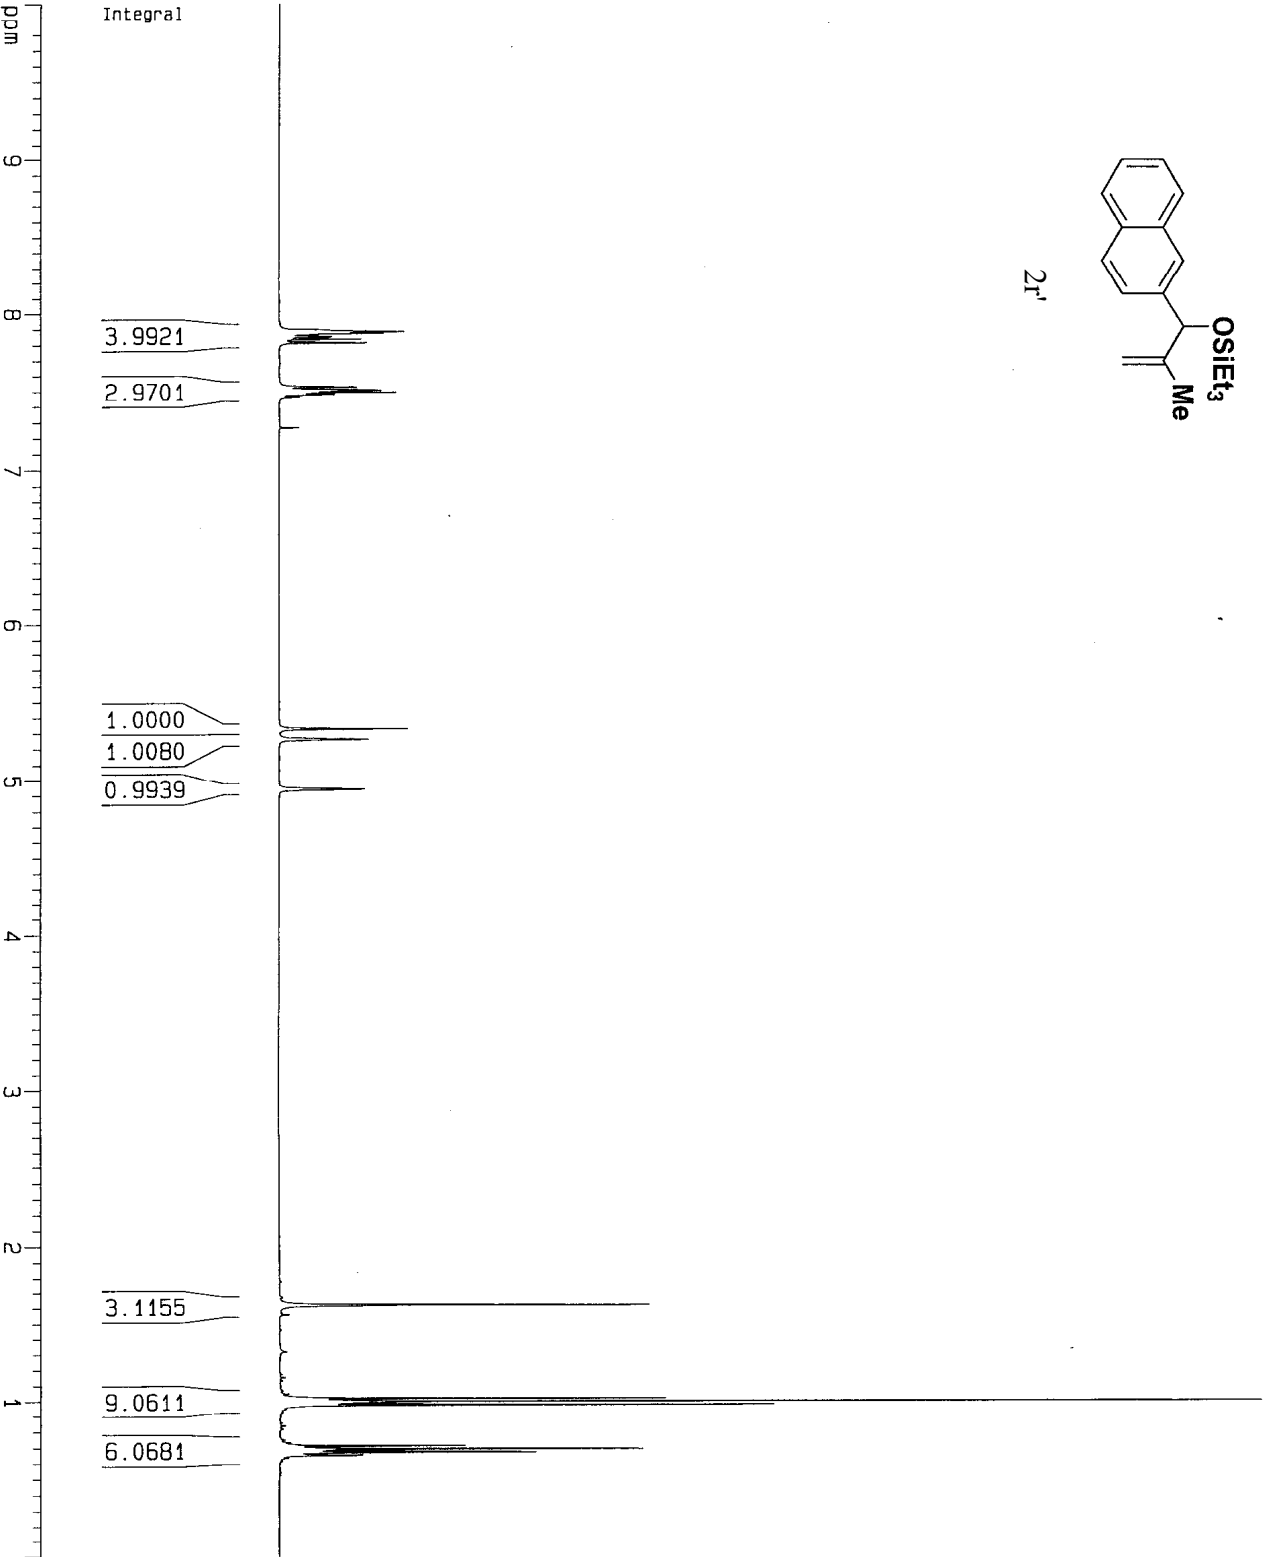

Current Data Parameters  
NAME SN835-aj1-H  
EXPNO 1  
PROCNO 1

F2 - Acquisition Parameters  
Date\_ 20051014  
Time 12.08

INSTRUM spect  
PROBHD 5 mm QNP 1H/1  
PULPROG zg30  
TD 65536  
SOLVENT CDCl3  
NS 8  
DS 2

SWH 8278.146 Hz  
FIDRES 0.126314 Hz  
AQ 3.9584243 sec  
RG 71.8  
DM 60.400  
DE 6.00  
TE 294.8

D1 1.00000000  
MCREST 0.00000000  
MCMRK 0.01500000 sec  
S134

==== CHANNEL f1 =====  
NUC1 1H  
P1 9.88 usec  
PL1 3.00 dB  
SF01 400.1324710 MHz

F2 - Processing parameters  
SI 32768  
SF 400.130059 MHz  
MDW EM  
SSB 0  
LB 0.30 Hz  
GB 0  
PC 1.00

1D NMR plot parameters  
CX 20.00 cm  
CY 12.50 cm  
F1P 10.000 ppm  
F1 4001.30 Hz  
F2P 0.000 ppm  
F2 0.00 Hz  
PPMCM 0.50000 ppm/cm  
HZCM 200.06500 Hz/cm

SN050835 a11y11c

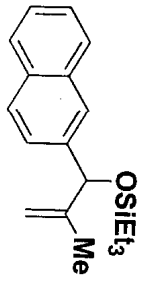

2r'

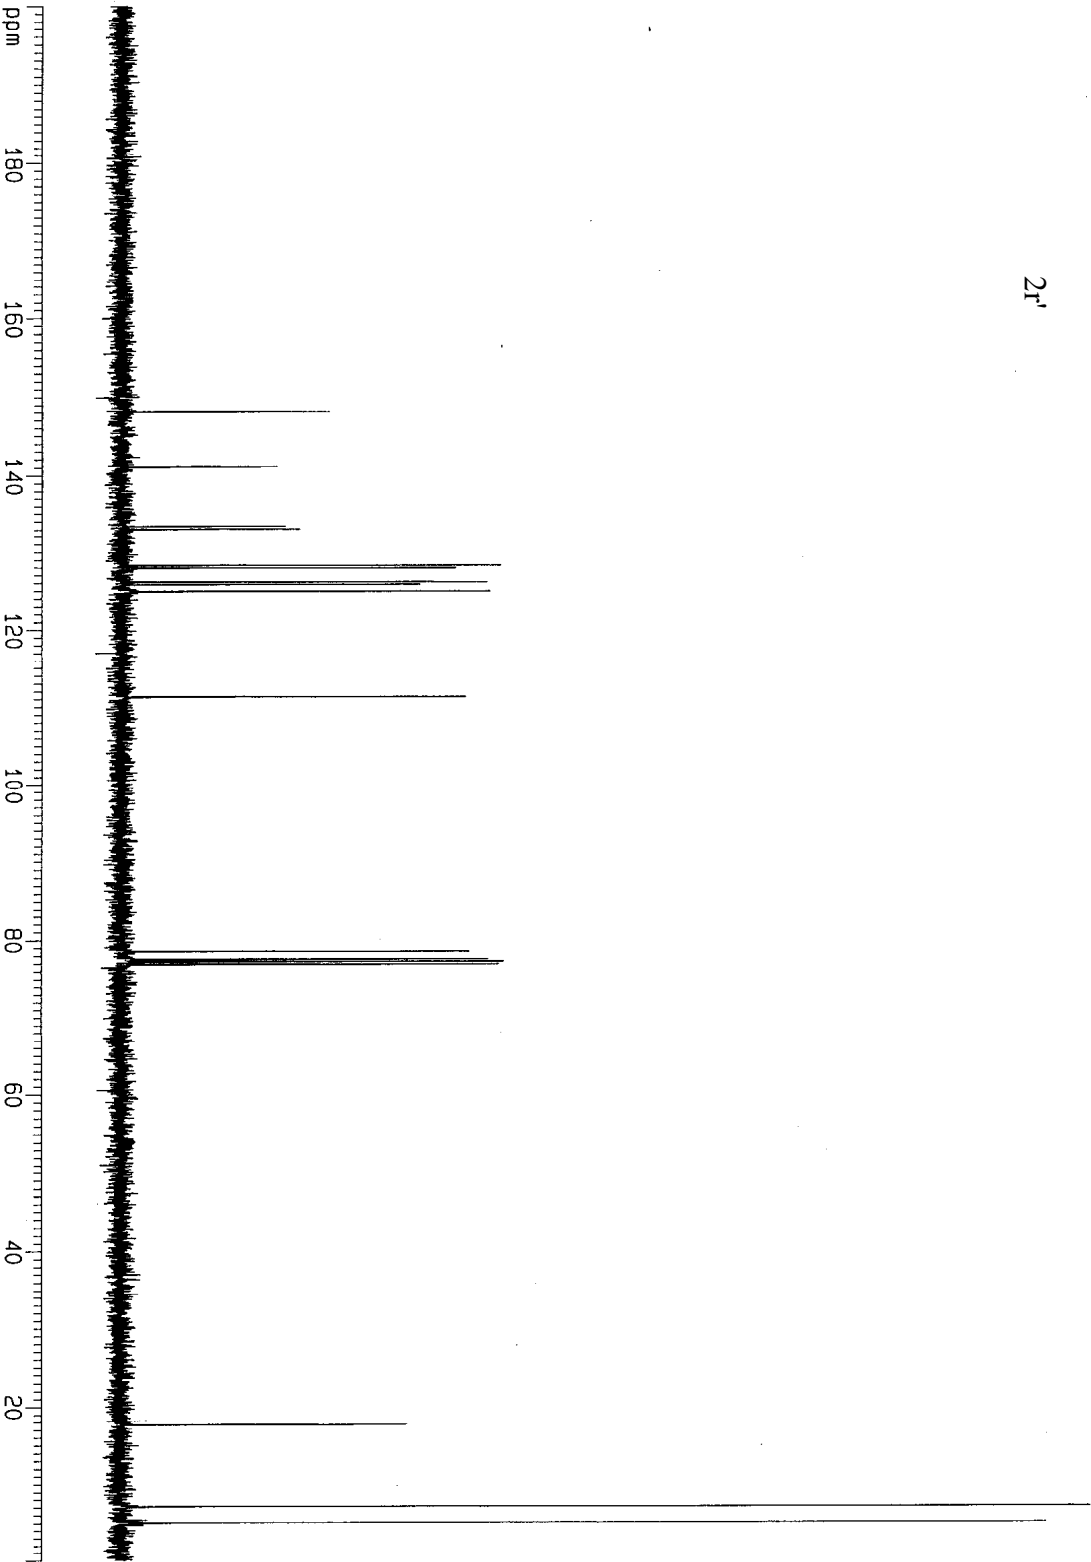

Current Data Parameters  
NAME SNB35-a11-C  
EXPNO 1  
PROCNO 1

F2 - Acquisition Parameters

Date\_ 20051014  
Time 12.16  
INSTRUM spect  
PROBHD 5 mm QNP 1H/1  
PULPROG zgpg30  
TO 65536  
SOLVENT CDCl3  
NS 193  
DS 4  
SWH 23980.814 Hz  
FIDRES 0.35918 Hz  
AQ 1.3664756 sec  
RG 2396.3  
DM 20.850 usec  
DE 6.00 usec  
TE 294.8 K  
D1 2.00000000 sec  
d11 0.03000000 sec  
DELTA 1.89999998 sec  
MCREST 0.00000000 sec  
MCWRK 0.01500000 sec

135-

==== CHANNEL f1 =====  
NUC1 13C  
P1 8.50 usec  
PL1 3.00 dB  
SFO1 100.628298 MHz

==== CHANNEL f2 =====  
CPDPRG2 waltz16  
NUC2 1H  
PCPD2 88.01 usec  
PL2 3.00 dB  
PL12 22.00 dB  
PL13 22.00 dB  
SFO2 400.1316005 MHz

F2 - Processing parameters  
SI 32768  
SF 100.6127535 MHz  
WDW EM  
SSB 0  
LB 1.00 Hz  
GB 0  
PC 1.40

1D NMR plot parameters

CX 20.00 cm  
CY 12.50 cm  
F1P 200.000 ppm  
F1 20122.55 Hz  
F2P 0.000 ppm  
F2 0.00 Hz  
PPMCM 10.00000 ppm/cm  
HZCM 1006.12756 Hz/cm

SN050835 homoallylic

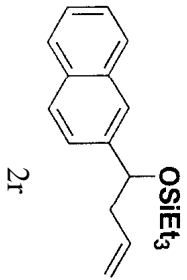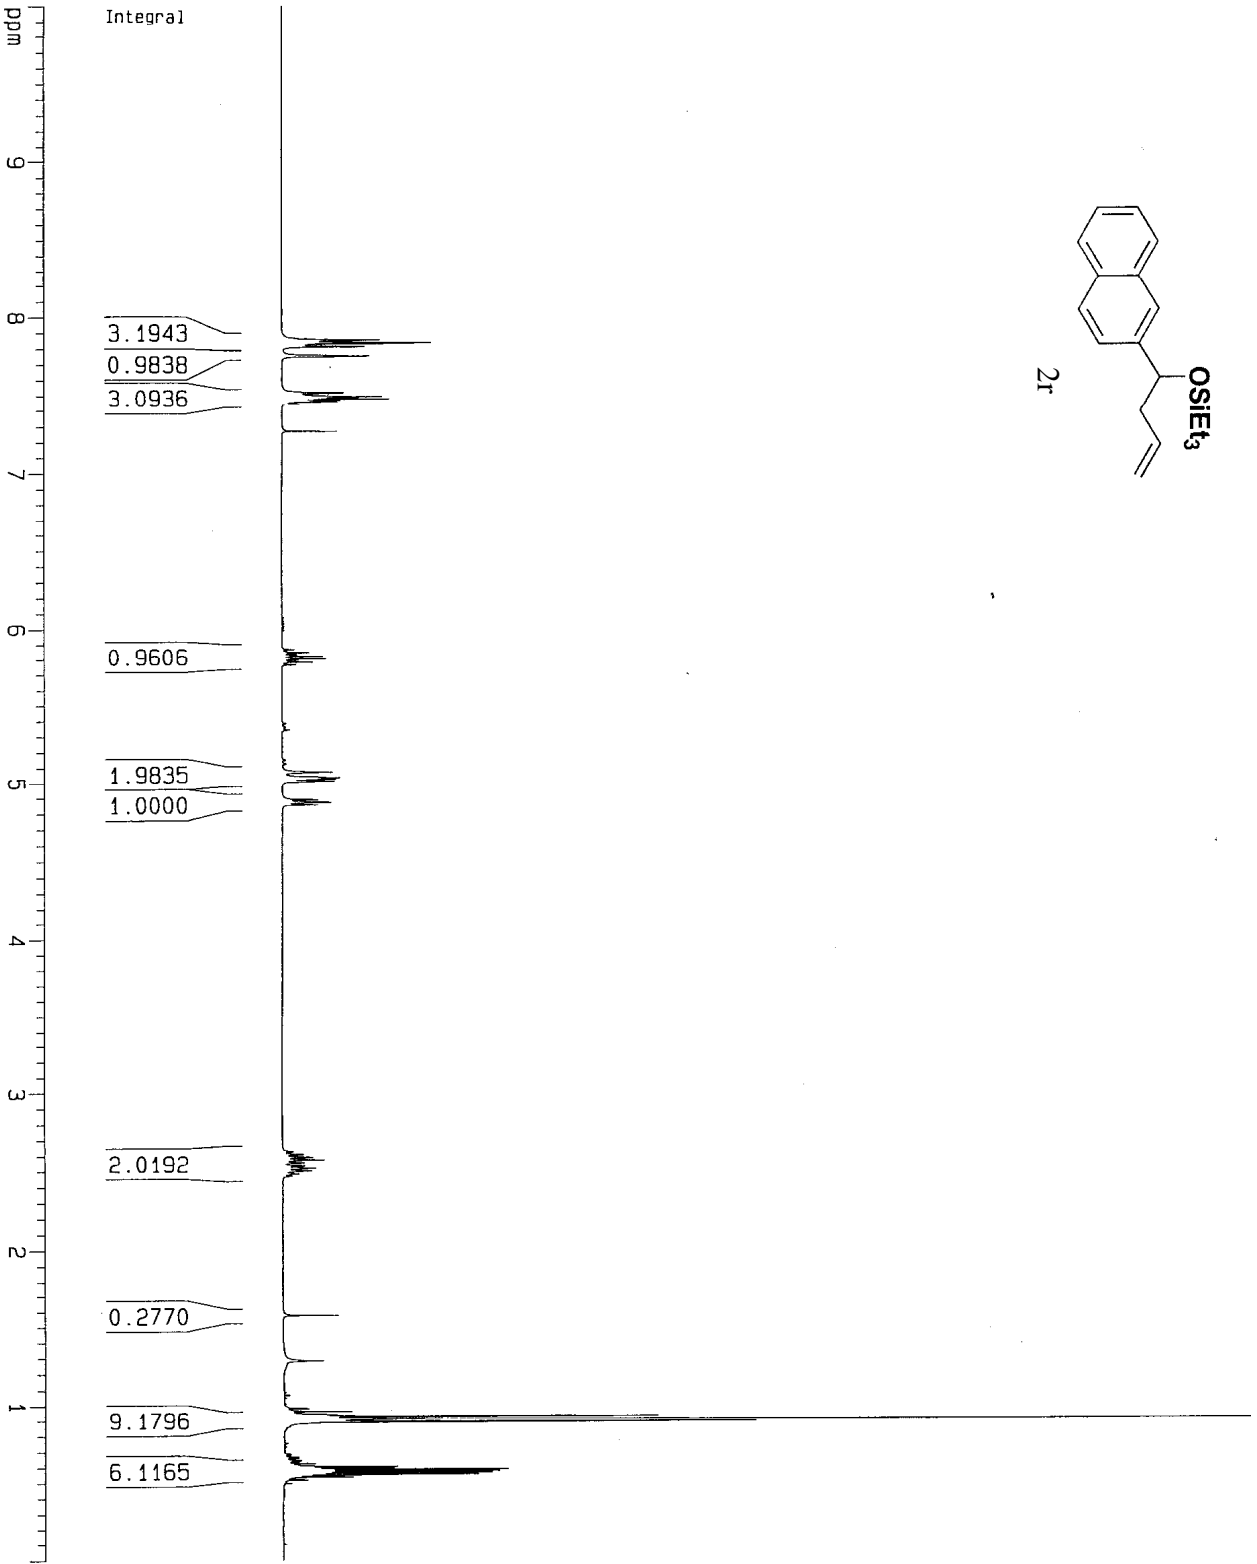

Current Data Parameters  
NAME SN835-ho-C  
EXPNO 1  
PROCNO 1

F2 - Acquisition Parameters

Date\_ 20051014  
Time 12:27  
INSTRUM spect  
PROBHD 5 mm QNP 1H/1  
PULPROG zg30  
TD 65536  
SOLVENT CDCl3  
NS 8  
DS 2  
SMH 8278.146 Hz  
FIDRES 0.126314 Hz  
AQ 3.9584243 sec  
RG 143.7  
DM 60.400  
DE 5.00  
TE 294.8  
D1 1.00000000  
MCREST 0.00000000 s/c  
MCWRR 0.01500000 sec

===== CHANNEL f1 =====  
NUC1 1H  
P1 9.88 usec  
PL1 3.00 dB  
SF01 400.1324710 MHz

F2 - Processing parameters  
SI 32768  
SF 400.1300054 MHz  
WDW EM  
SSB 0  
LB 0.30 Hz  
GB 0  
PC 1.00

1D NMR plot parameters  
CX 20.00 cm  
CY 12.50 cm  
F1P 10.000 ppm  
F1 4001.30 Hz  
F2P 0.000 ppm  
F2 0.00 Hz  
PPKM 0.50000 ppm/cm  
HZCM 200.06500 Hz/cm



SN050835 homoallylic

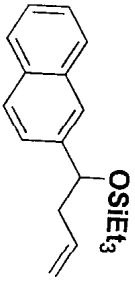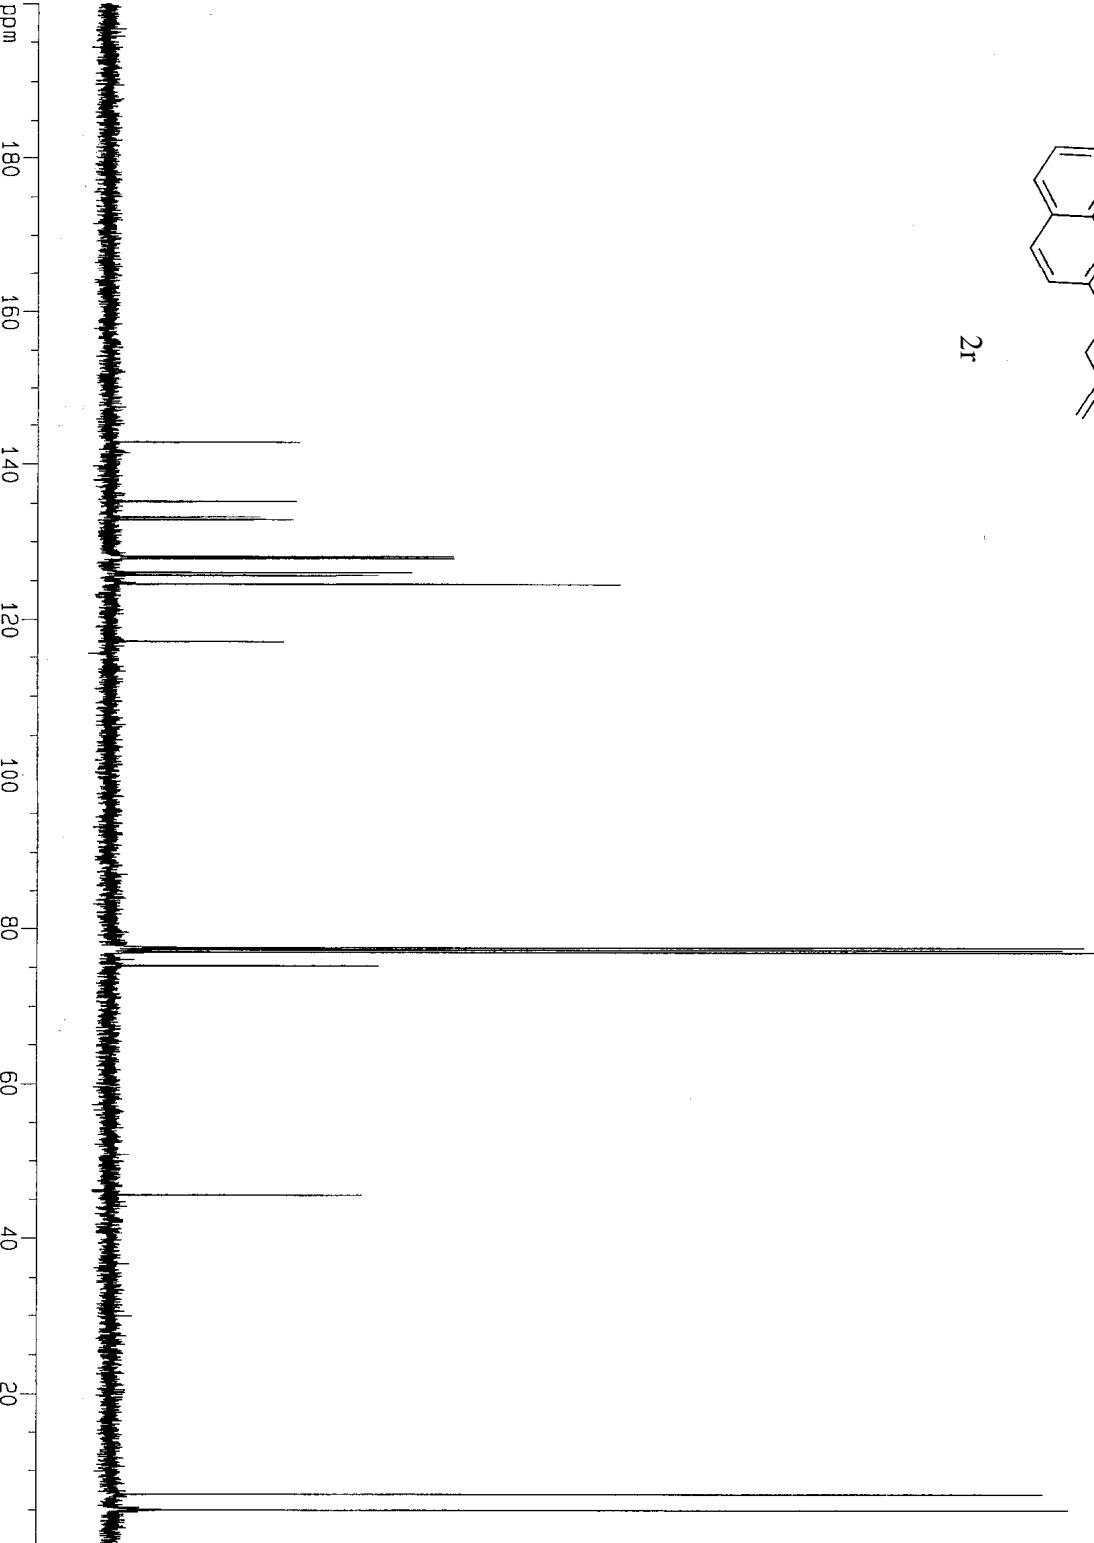

Current Data Parameters  
 NAME SN05-ho-C  
 EXPNO 1  
 PROCNO 1

F2 - Acquisition Parameters  
 Date\_ 20051015  
 Time 12.12

INSTRUM spect  
 PROBD 5mm BBO BB-1  
 PULPROG zgpg30  
 TD 65536  
 SOLVENT CDCl3  
 NS 302  
 DS 4

SWH 25125.629 Hz  
 FIDRES 0.383387 Hz  
 AQ 1.3042164 sec  
 RG 2048  
 DM 19.900 usec  
 DE 6.00 u  
 TE 300.0 K

D1 2.00000000 s  
 d11 0.03000000 s  
 d12 0.00002000 s

CHANNEL f1  
 NUC1 13C  
 P1 15.25 usec  
 PL1 3.00 dB  
 SF01 100.6237959 MHz

CHANNEL f2  
 NUC2 1H  
 P2 107.50 usec  
 PL2 0.00 dB  
 PL12 24.00 dB  
 PL13 24.00 dB  
 SF02 400.1316005 MHz

F2 - Processing parameters  
 SI 32768  
 SF 100.6127507 MHz  
 WDM EM  
 SSB 0  
 LB 1.00 Hz  
 GB 0  
 PC 1.40

1D NMR plot parameters  
 CX 20.00 cm  
 F1P 200.000 ppm  
 F1 20122.55 Hz  
 F2P 0.000 ppm  
 F2 0.00 Hz  
 PPMCM 10.0000 ppm/cm  
 HZCM 1006.12738 Hz/cm

-S137-

SN061027 TBAF

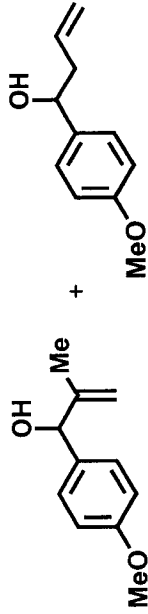

Current Data Parameters  
NAME SN1027-TBAF-C  
EXPNO 1  
PROCNO 1

F2 - Acquisition Parameters  
Date\_ 20060131  
Time 19.23  
INSTRUM spect  
PROBHD 5mm BBO BB-1  
PULPROG zgpg30  
TD 65536  
SOLVENT CDCl3  
NS 98  
DS 4  
SWH 25125.629 Hz  
FIDRES 0.383387 Hz  
AQ 1.3042164 sec  
RG 3649.1  
DW 19.900 usec  
DE 6.00 usec  
TE 300.0 K  
D1 2.00000000 sec  
d11 0.03000000 sec  
d12 0.00002000 sec

NUC1 13C  
P1 15.25 usec  
PL1 3.00 dB  
SF01 100.6237959 MHz

===== CHANNEL f2 =====  
CPOPRG2 waltz16  
NUC2 1H  
PCPD2 107.50 usec  
PL2 0.00 dB  
PL12 24.00 dB  
PL13 24.00 dB  
SF02 400.1316005 MHz

F2 - Processing parameters  
SI 32768  
SF 100.6127553 MHz  
WDW EM  
SSB 0  
LB 1.00 Hz  
GB 0  
PC 1.40

1D NMR plot parameters  
CX 20.00 cm  
F1P 200.000 ppm  
F1 20422.55 Hz  
F2P 0.000 ppm  
F2 0.00 Hz  
PPMCM 10.0000 ppm/cm  
HZCM 1006.12756 Hz/cm

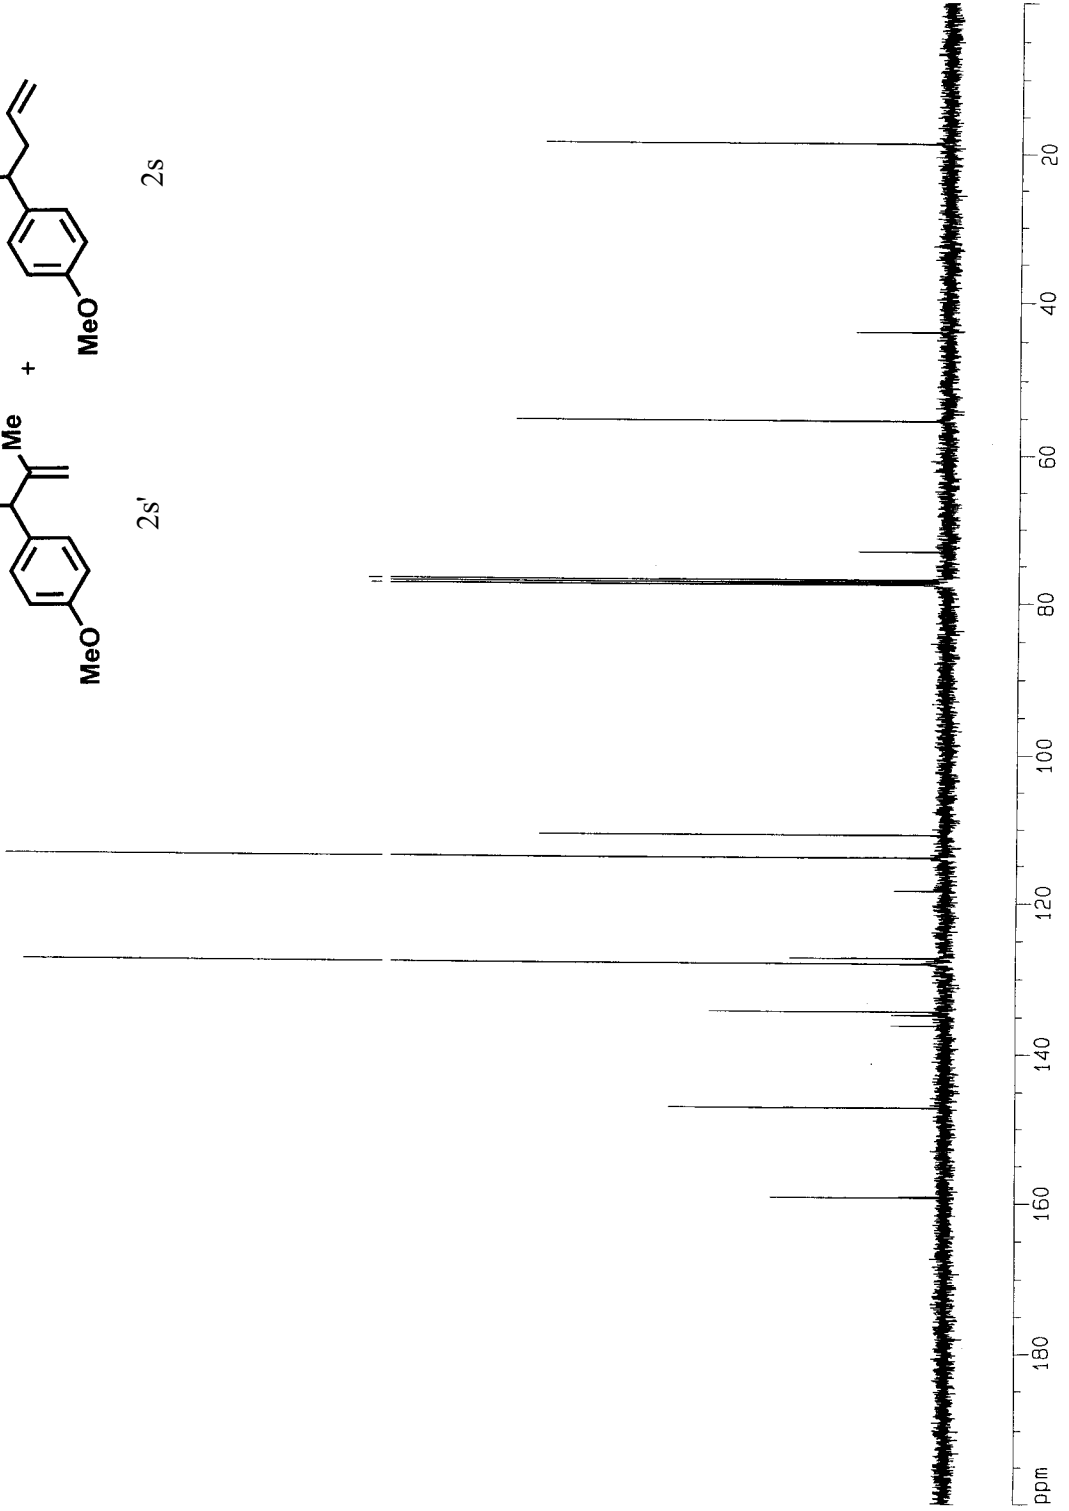

SN061027 TBAF

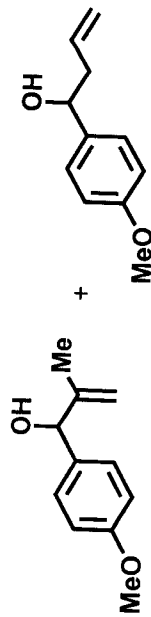

Current Data Parameters  
NAME SN1027-TBAF-H  
EXPNO 1  
PROCNO 1

F2 - Acquisition Parameters  
Date\_ 20060131  
Time 19.16  
INSTRUM spect  
PROBHD 5mm 880 BB-1  
PULPROG zg30  
TD 65536  
SOLVENT CDC13  
NS 8  
DS 2  
SWH 8278.146 Hz  
FIDRES 0.126314 Hz  
AQ 3.9584243 sec  
RG 57  
DW 60.400 usec  
DE 6.00 usec  
TE 300.0 K  
D1 1.00000000 sec

===== CHANNEL f1 =====  
NUC1 1H  
P1 7.90 usec  
PL1 0.00 dB  
SF01 400.1324710 MHz

F2 - Processing parameters  
SI 32768  
SF 400.1300000 MHz  
WDW EM  
SSB 0  
LB 0.30 Hz  
GB 0  
PC 1.00

1D NMR plot parameters  
CX 20.00 cm  
F1P 10.000 ppm  
F1 4001.30 Hz  
F2P 0.000 ppm  
F2 0.00 Hz  
PPMCM 0.50000 ppm/cm  
HZCM 200.06500 Hz/cm

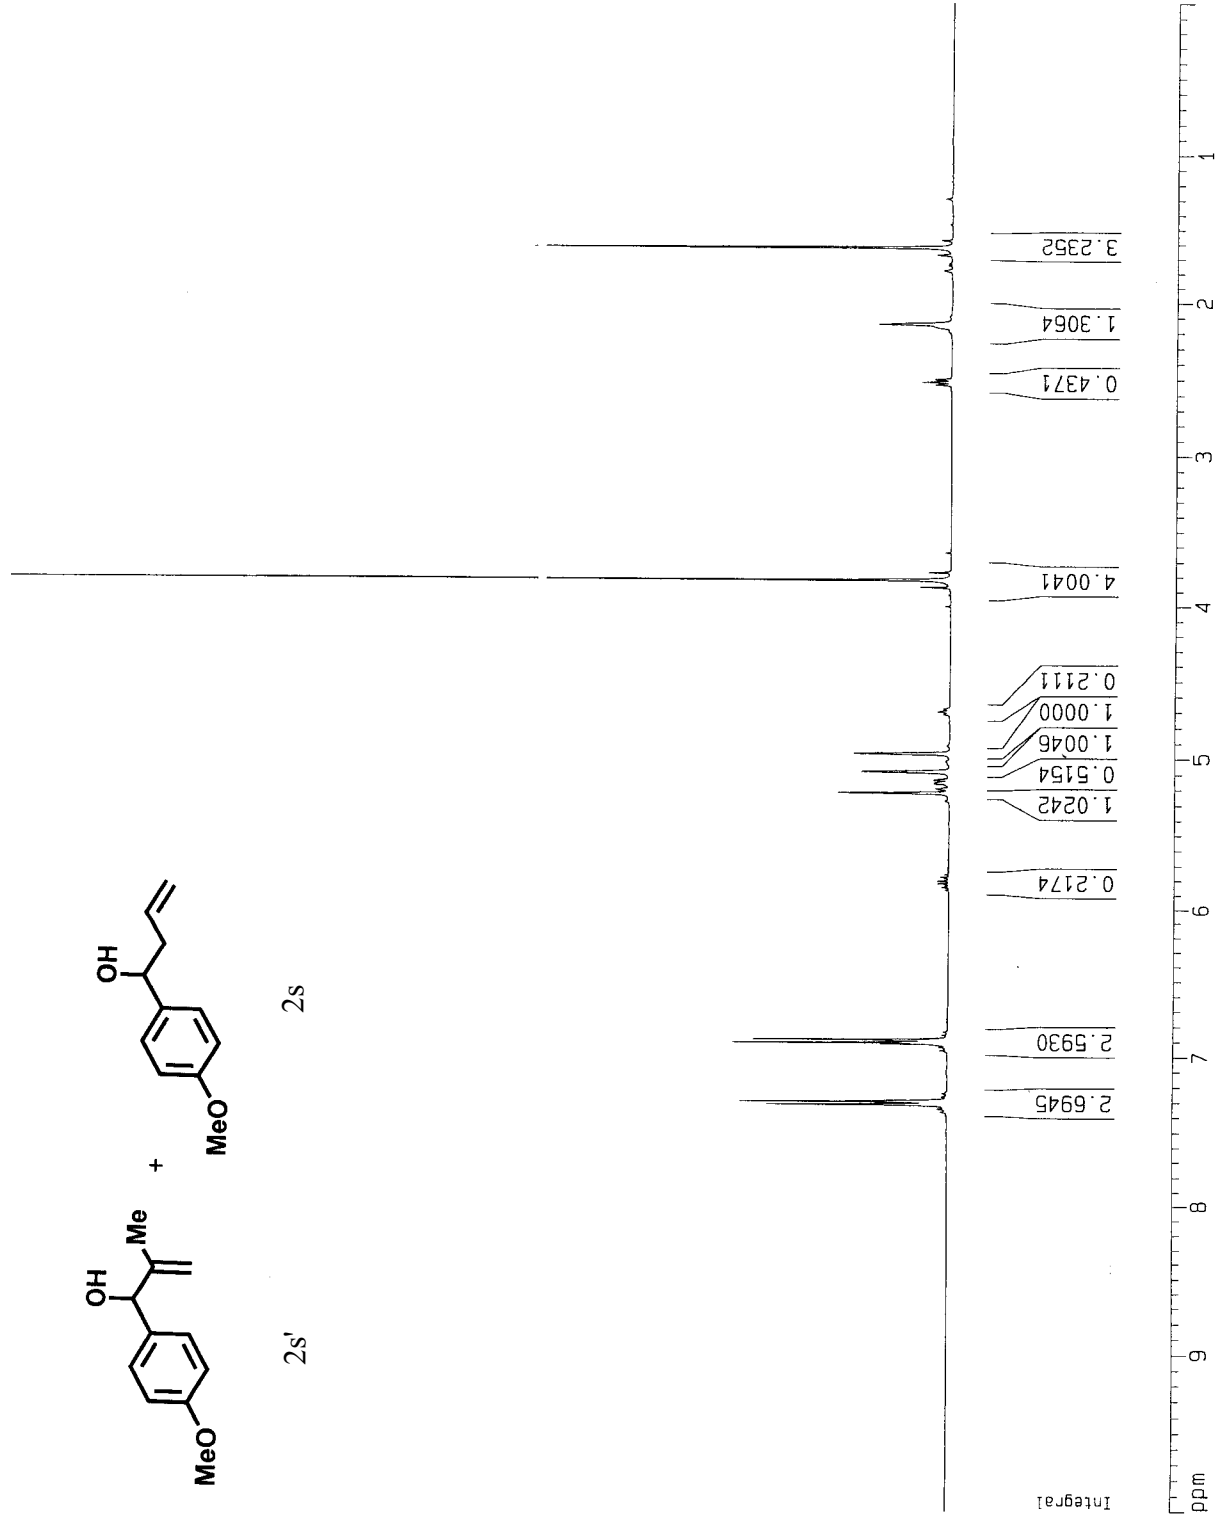

SN050672 a

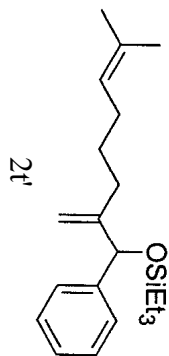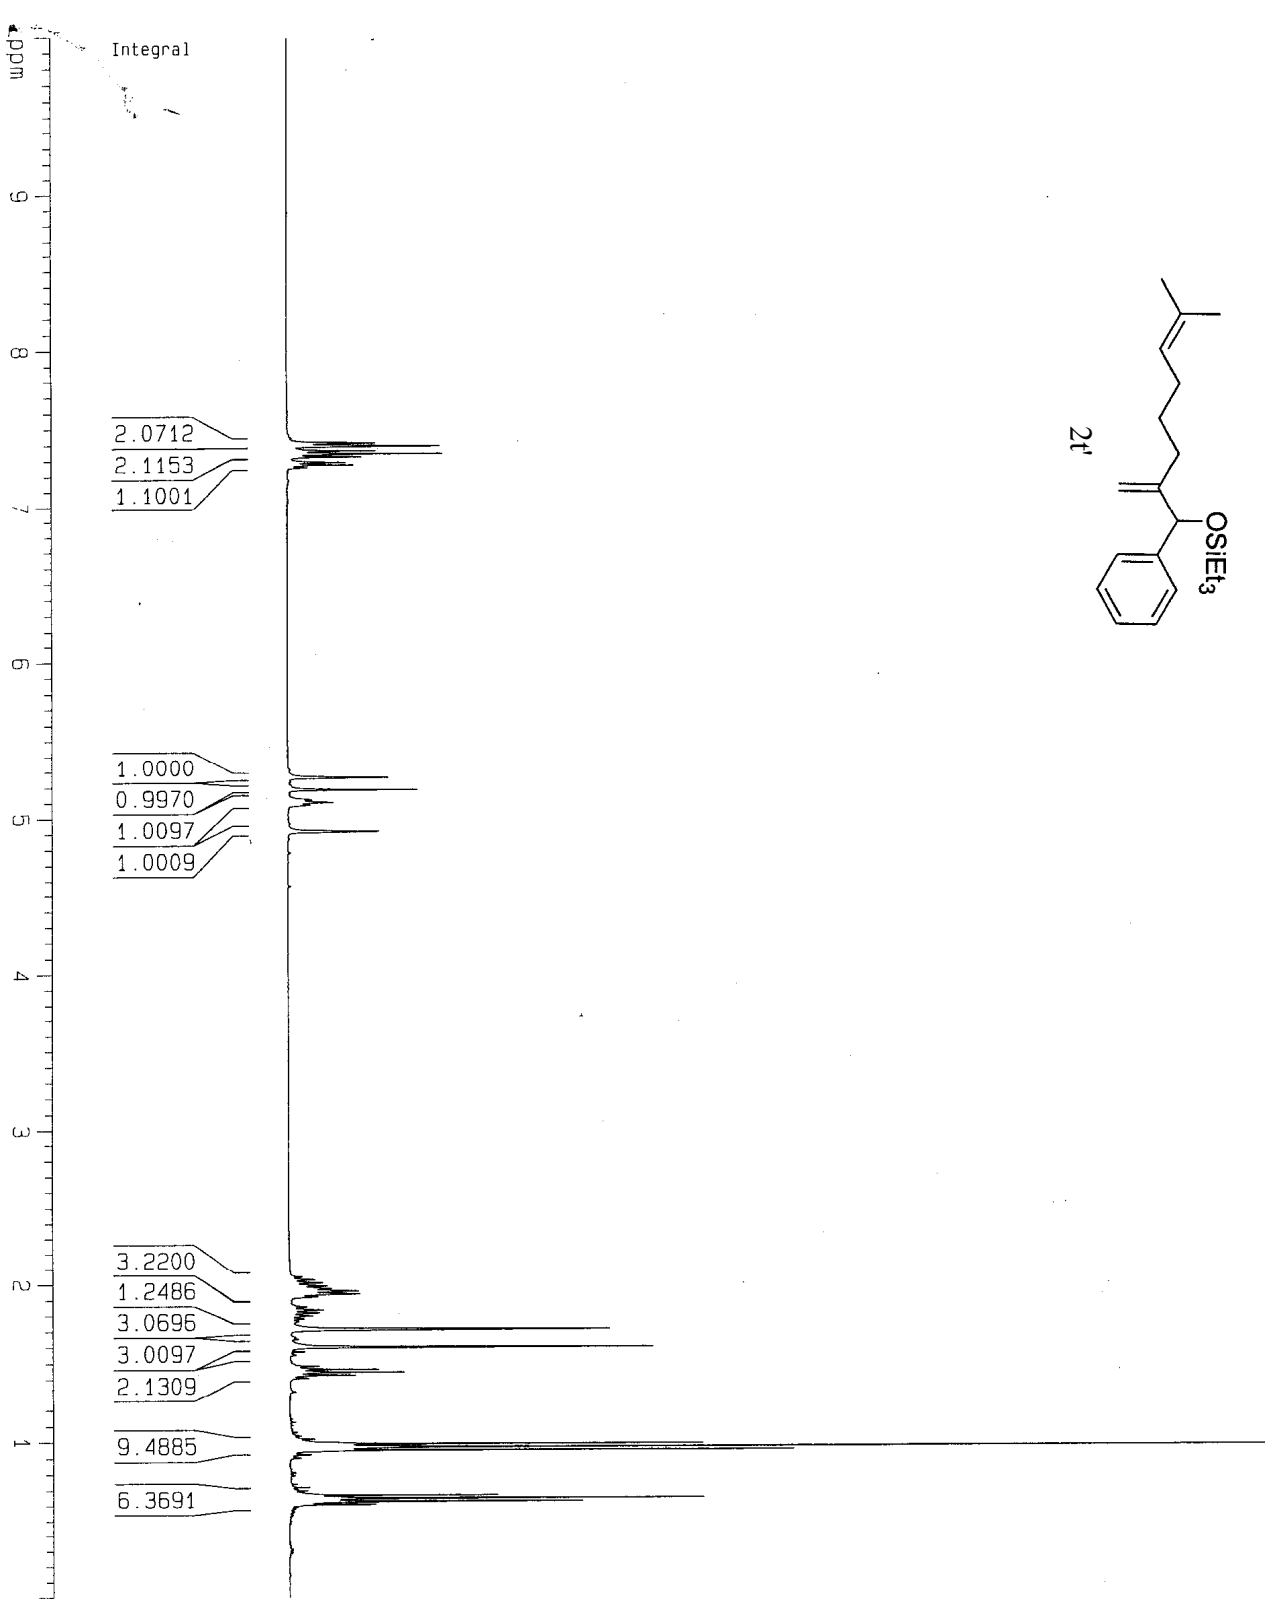

Current Data Parameters  
NAME SN672-a-H  
EXPNO 1  
PROCNO 1

F2 - Acquisition Parameters

Date\_ 20050625  
Time 16.55  
INSTRUM spect  
PROBHD 5 mm QNP 1H  
PULPROG zg30  
TD 65536  
SOLVENT CDCl3  
NS 16  
DS 4  
SWH 8278.146 Hz  
FIDRES 0.126314 Hz  
AQ 3.9584243 sec  
RG 32  
DM 60.400 usec  
DE 6.00 usec  
TE 300.0 K  
D1 1.00000000 sec

===== CHANNEL f1 =====

NUC1 1H  
P1 9.50 usec  
PL1 2.00 dB  
SF01 400.1324710 MHz

F2 - Processing parameters

SI 32768  
SF 400.1300000 MHz  
WDW EM  
SSB 0  
LB 0.30 Hz  
GB 0  
PC 1.00

1D NMR plot parameters

CX 20.00 cm  
F1P 10.000 ppm  
F1 4001.30 Hz  
F2P 0.000 ppm  
F2 0.00 Hz  
PPMCK 0.50000 ppm/cm  
HZCM 200.06500 Hz/cm

SN050672 a

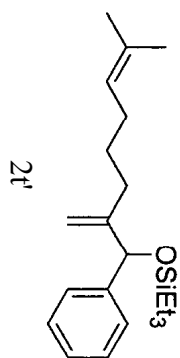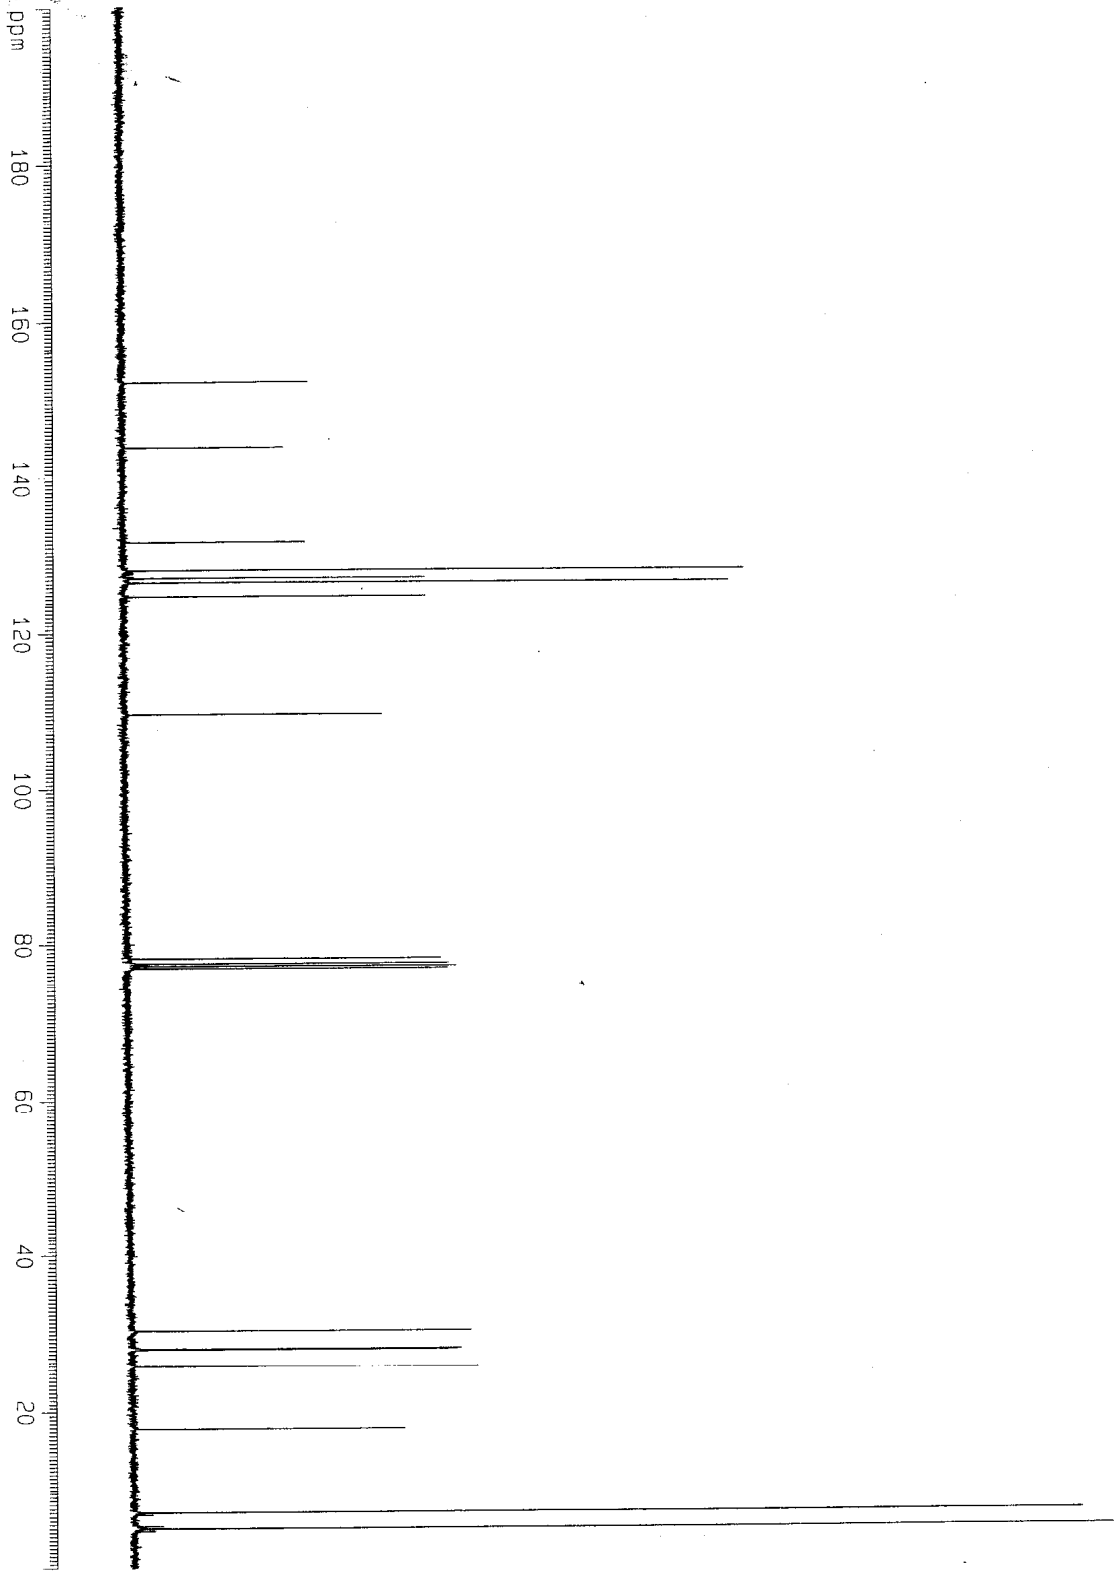

Current Data Parameters  
NAME SN672-a-C  
EXPNO 1  
PROCNO 1

F2 - Acquisition Parameters  
Date\_ 20050625  
Time 18.00

INSTRUM spect  
PROBHD 5 mm QNP 1H  
PULPROG zgpg30  
TD 65536  
SOLVENT CDCl3  
NS 760  
DS 4

SWH 24330.900 Hz  
FIDRES 0.371260 Hz  
AQ 1.3468148 sec  
RG 1824.6  
DW 20.550 usec  
DE 6.00 usec  
TE 300.0 K

D1 2.00000000 sec  
d11 0.03000000 sec  
d12 0.00002000 sec

===== CHANNEL f1 =====  
NUC1 13C  
P1 8.50 usec  
PL1 3.00 dB  
SF01 100.6237959 MHz

===== CHANNEL f2 =====  
CPDPRG2 waltz16  
NUC2 1H  
PCPD2 100.00 usec  
PL2 2.00 dB  
PL12 22.00 dB  
PL13 22.00 dB  
SF02 400.1316005 MHz

F2 - Processing parameters  
SI 32768  
SF 100.6127518 MHz  
WDW EM  
SSB 0  
LB 1.00 Hz  
GB 0  
PC 1.40

1D NMR plot parameters  
CX 20.00 cm  
F1P 200.000 ppm  
F1 20122.55 Hz  
F2P 0.000 ppm  
F2 0.00 Hz  
PPMCM 10.00000 ppm/cm  
HZCM 1006.12756 Hz/cm

SN050672-b

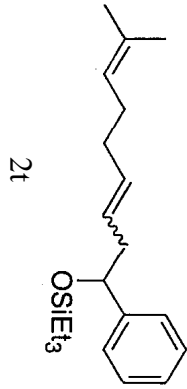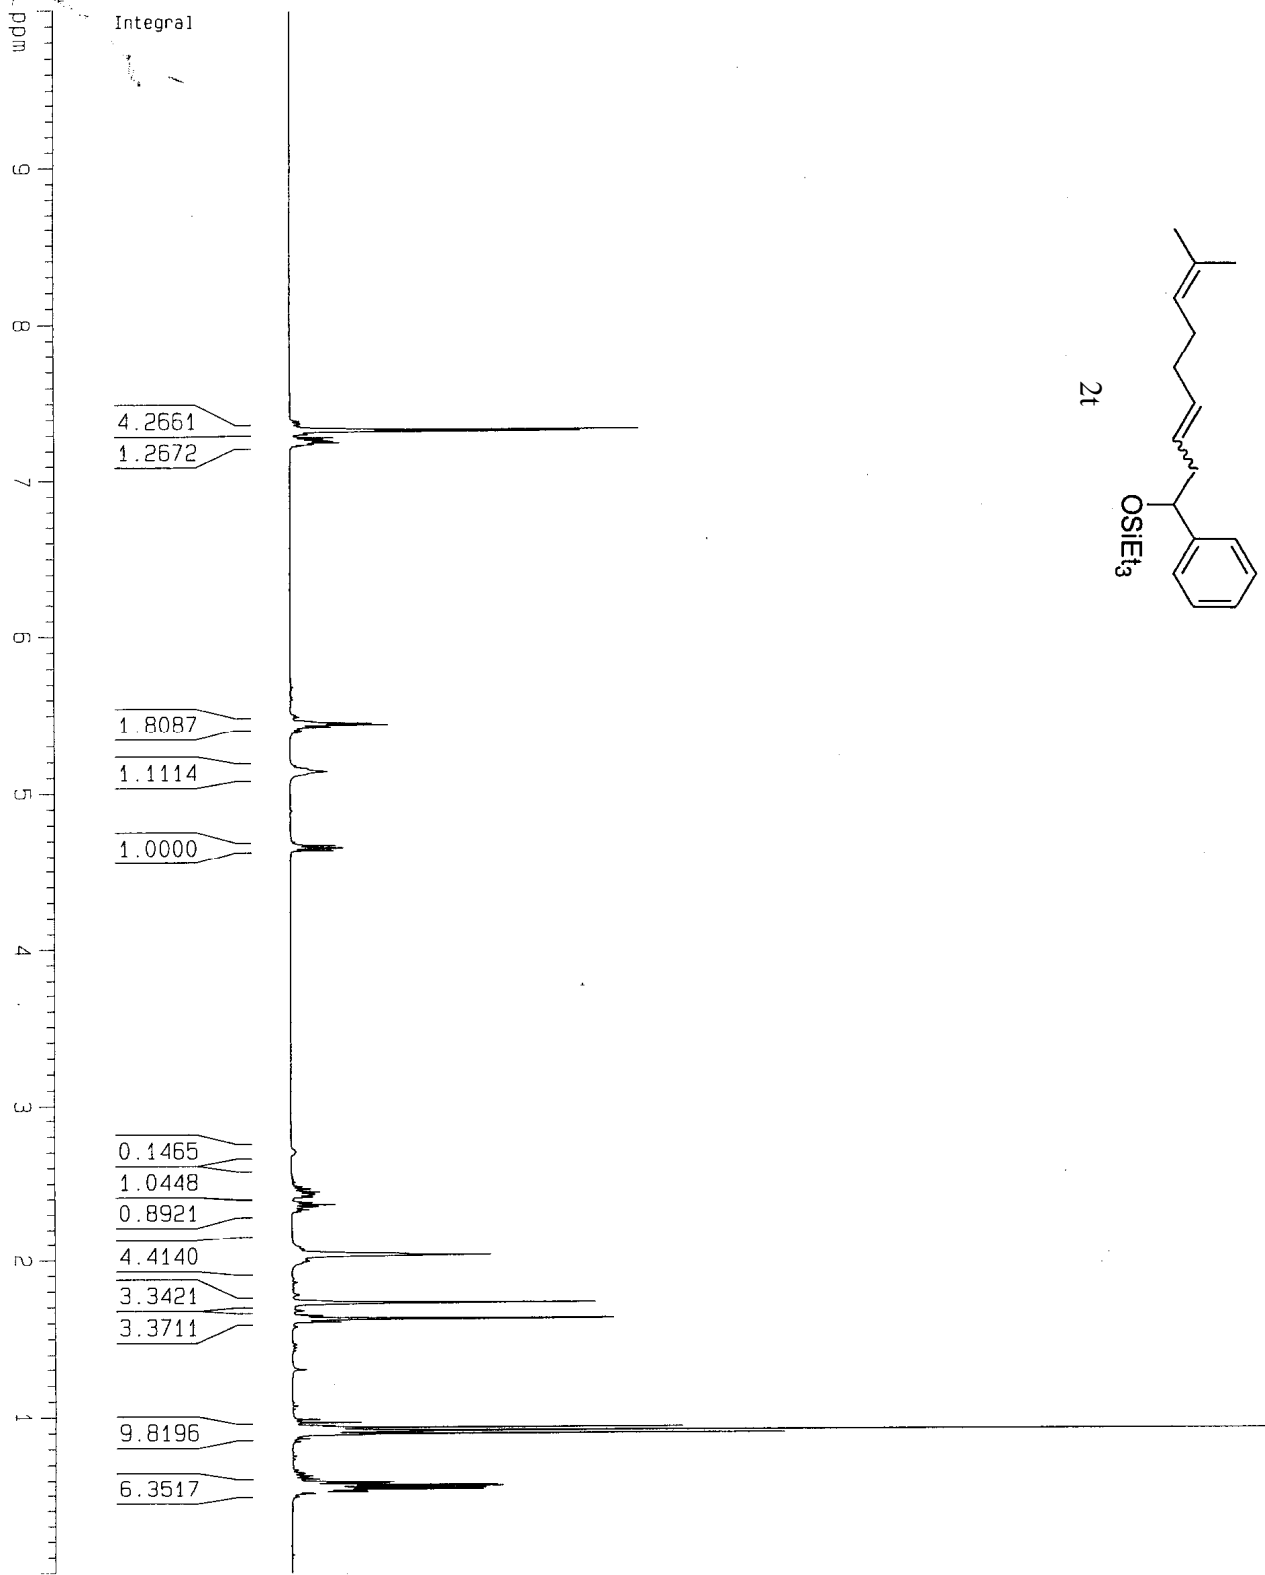

Current Data Parameters  
NAME SN672-b-H  
EXPNO 1  
PROCNO 1

F2 - Acquisition Parameters  
Date\_ 20050625  
Time 18.50  
INSTRUM spect  
PROBHD 5 mm QNP 1H  
PULPROG zg30  
TD 65536  
SOLVENT CDCl3  
NS 8  
DS 4  
SMH 8278.146 Hz  
FIDRES 0.126314 Hz  
AQ 3.9584243 sec  
RG 34  
DM 60.400 usec  
DE 6.00 usec  
TE 300.0 K  
D1 1.00000000 sec

===== CHANNEL f1 =====  
NUC1 1H  
P1 9.50 usec  
PL1 2.00 dB  
SF01 400.1324710 MHz

F2 - Processing parameters  
SI 32768  
SF 400.1300000 MHz  
WDW EM  
SSB 0  
LB 0.30 Hz  
GB 0  
PC 1.00

1D NMR plot parameters  
CX 20.00 cm  
F1P 10.000 ppm  
F1 4001.30 Hz  
F2P 0.000 ppm  
F2 0.00 Hz  
PPMCM 0.50000 ppm/cm  
HZCM 200.06500 Hz/cm

SN050672-b

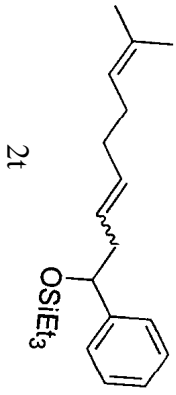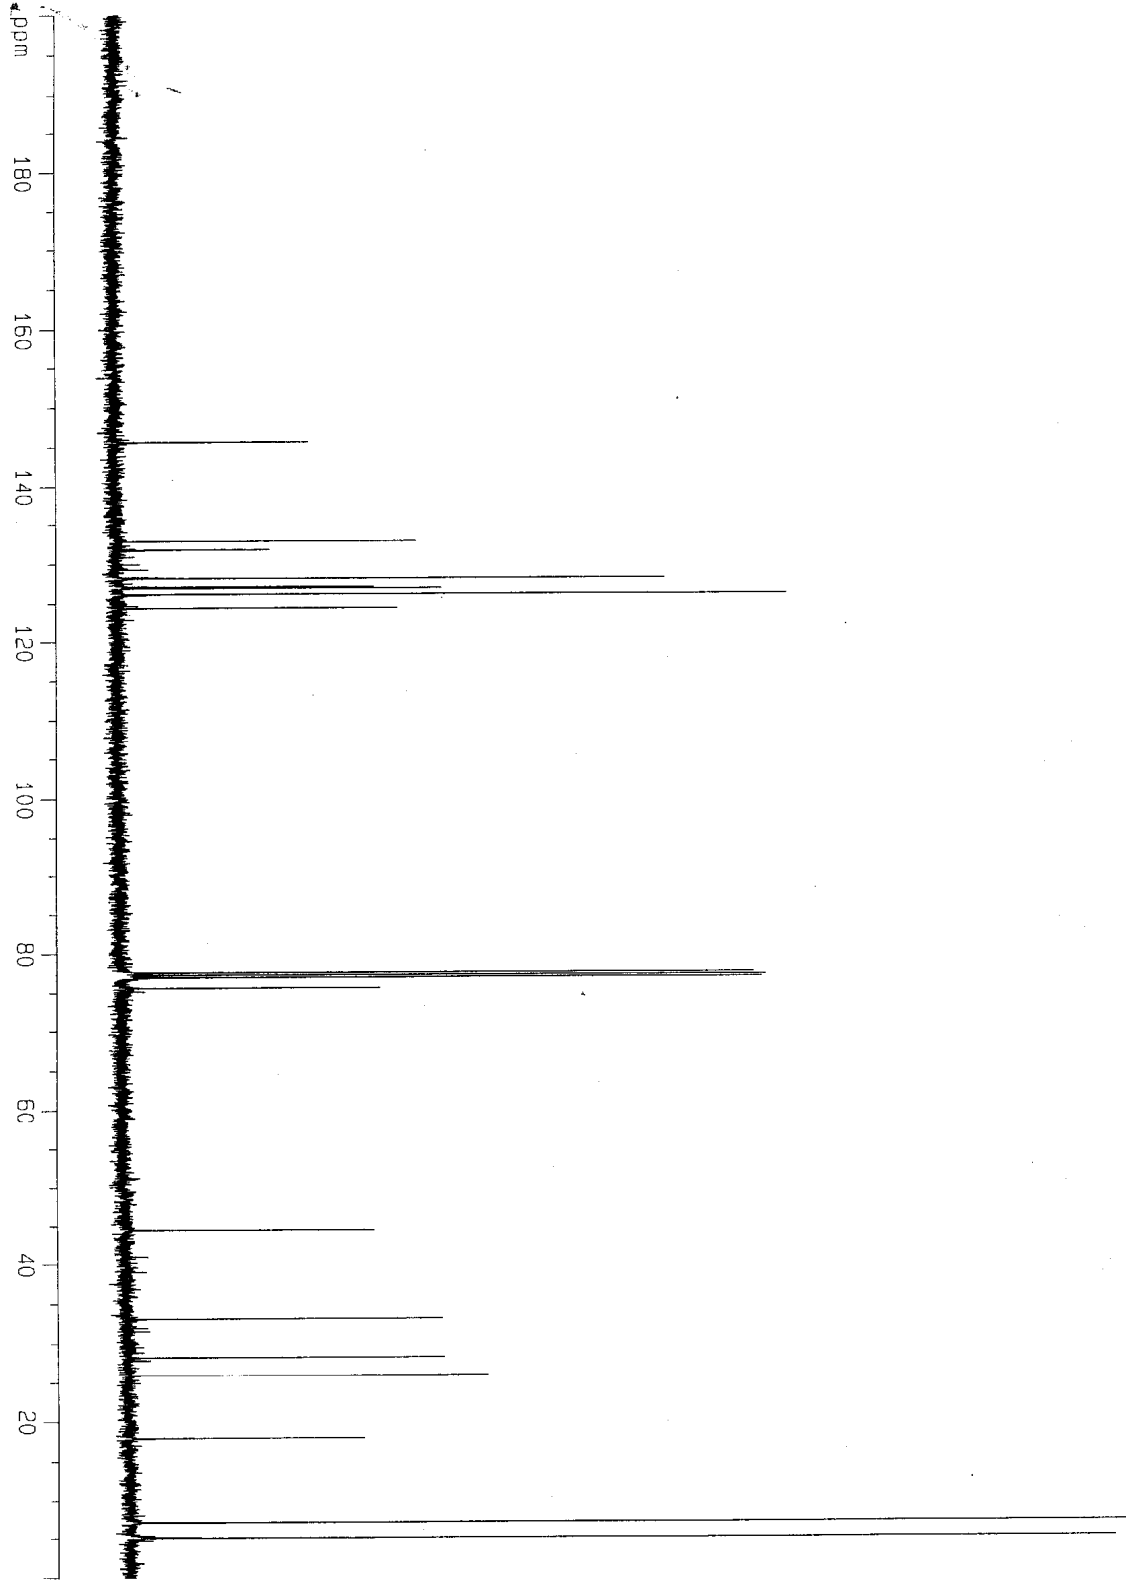

Current Data Parameters  
NAME SM672-b-C  
EXPNO 1  
PROCNO 1

F2 - Acquisition Parameters  
Date\_ 20050625  
Time 18.59

INSTRUM spect  
PROBHD 5 mm QNP 1H  
PULPROG zgpg30  
TD 65536  
SOLVENT CDCl3  
NS 746

DS 4  
SMH 24330.900 HZ  
FIDRES 0.371260 HZ  
AQ 1.3468148 sec  
RG 1149.4

DW 20.550 usec  
DE 6.00 usec  
TE 300.0 K  
D1 2.00000000 sec  
d11 0.03000000 sec  
d12 0.00002000 sec

==== CHANNEL f1 =====  
NUC1 13C  
P1 8.50 usec  
PL1 3.00 dB  
SF01 100.6237959 MHz

==== CHANNEL f2 =====  
CPDPRG2 waltz16  
NUC2 1H  
PCPD2 100.00 usec  
PL2 2.00 dB  
PL12 22.00 dB  
PL13 22.00 dB  
SF02 400.1316005 MHz

F2 - Processing parameters  
SI 32768  
SF 100.6127503 MHz  
WDW EM  
SSB 0  
LB 1.00 HZ  
GB 0  
PC 1.40

1D NMR p1oc: parameters  
CX 20.00 cm  
F1P 200.000 ppm  
F1 20122.55 HZ  
F2P 0.000 ppm  
F2 0.00 HZ  
PPMCK 10.00000 ppm/cm  
HZCM 1006.12744 HZ/cm

CyPPH2, f1

Current Data Parameters  
 NAME hc9-660cy-f1  
 EXPNO 1  
 PROCNO 1

F2 - Acquisition Parameters  
 Date\_ 20051201  
 Time 16.12  
 INSTRUM 5mm BBO BB-1  
 PROBR0 2930  
 PULPROG zgpg30  
 TO 65536  
 SOLVENT CDCl3  
 NS 10  
 DS 2  
 SM 6278.146 Hz  
 F1 71.0261 MHz  
 F2 400.1324710 MHz  
 A1 3.956424 sec  
 RG 60.400 usec  
 DE 6.00 usec  
 TE 300.0 K  
 D1 1.00000000 sec

\*\*\*\*\* CHANNEL f1 \*\*\*\*\*  
 NUC1 1H  
 P1 7.90 usec  
 PL1 0.00 dB  
 SFO1 400.1324710 MHz

F2 - Processing parameters  
 SI 32768  
 SF 400.1324710 MHz  
 N 65536  
 SSB 0  
 LB 0.30 Hz  
 GB 0  
 PC 1.00  
 JD NMR plot parameters  
 CX 24.00 cm  
 FIP 10.500 ppm  
 F1 4204.35 Hz  
 F2 -0.500 ppm  
 F2 -200.07 Hz  
 PPMCK 0.48833 ppm/cm  
 HZCM 183.39291 Hz/cm

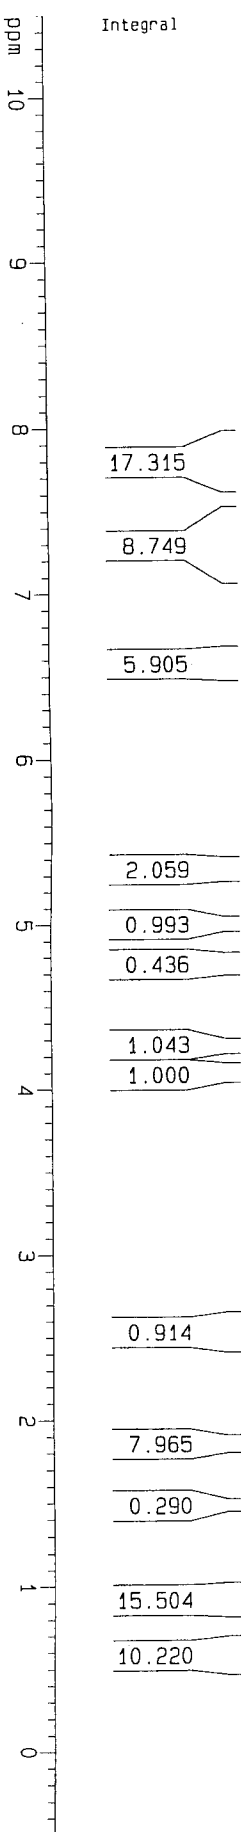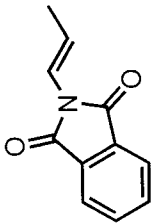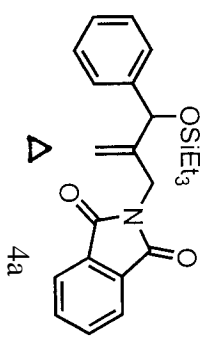



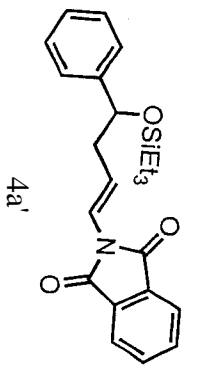

Current Data Parameters  
 NAME hcy-8-51-pf1  
 EXPNO 1  
 PROCNO 1

F2 - Acquisition Parameters  
 Date\_ 20051108  
 Time 16.12  
 INSTRUM spect  
 PROBHD 5mm BBO BB-1  
 PULPROG zg30  
 TO 2930  
 SOLVENT CDCl3  
 NS 6  
 DS 2  
 SMH 8278.146 Hz  
 FIDRES 0.126314 Hz  
 AQ 3.9584243 sec  
 RG 71.8  
 DW 60.400 usec  
 DE 6.00 usec  
 TE 300.0 K  
 D1 1.00000000 sec

===== CHANNEL f1 =====  
 NUC1 1H  
 P1 7.90 usec  
 PL1 0.00 dB  
 SF01 400.1324710 MHz

F2 - Processing parameters  
 SI 32768  
 SF 400.1300016 MHz  
 WDW EM  
 SSB 0  
 LB 0.30 Hz  
 GB 0  
 PC 1.00

1D NMR plot parameters  
 CX 20.00 cm  
 F1P 10.500 ppm  
 F1 4201.37 Hz  
 F2P -0.500 ppm  
 F2 -200.07 Hz  
 PPMCM 0.55000 ppm/cm  
 HZCM 220.07150 Hz/cm

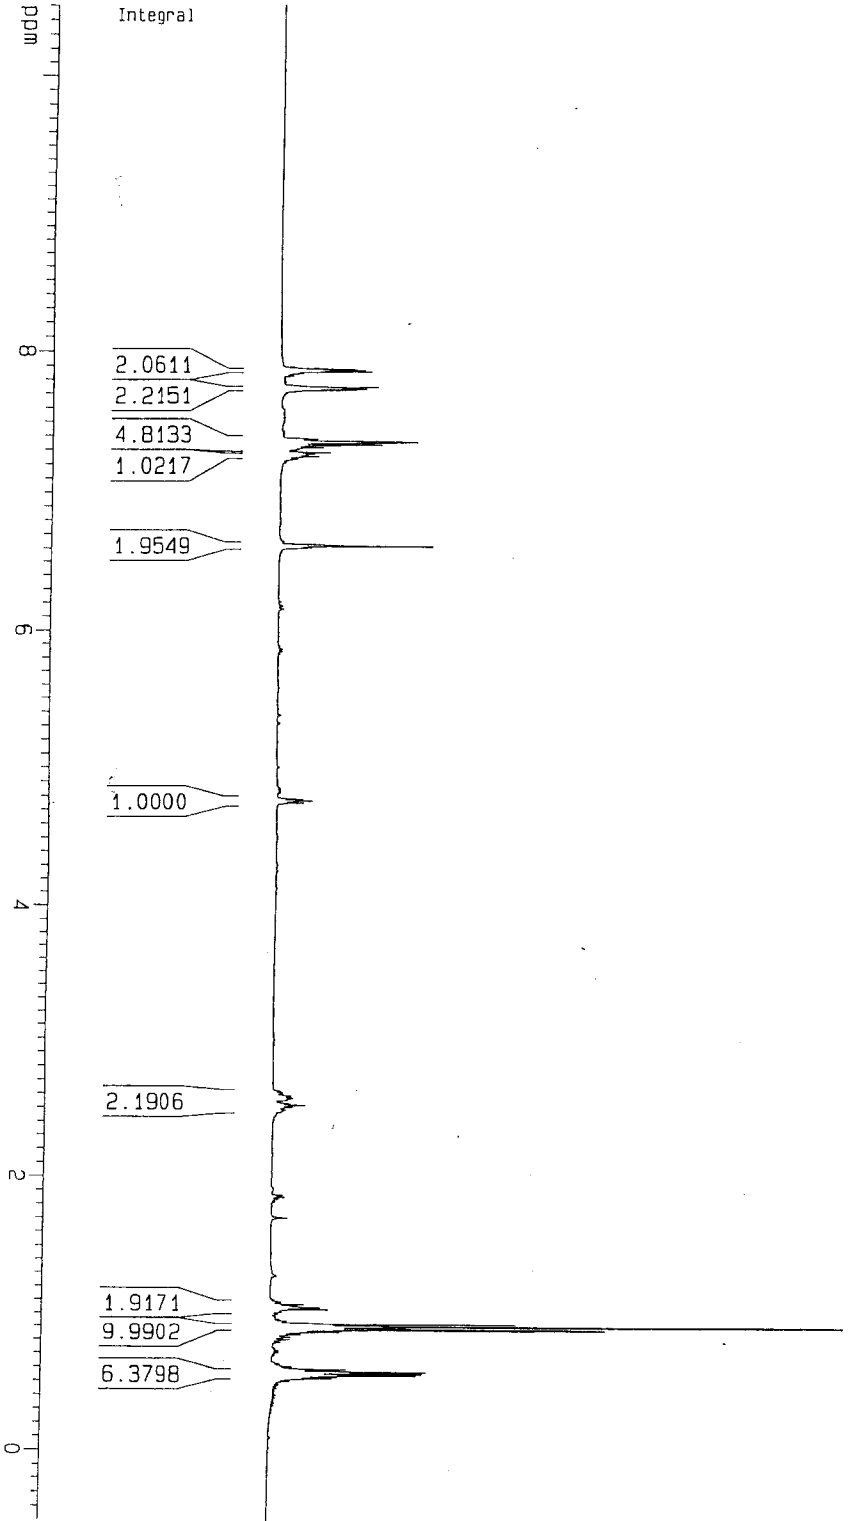

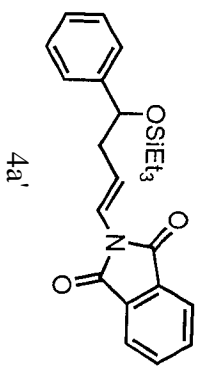

Current Data Parameters  
 NAME hcy-8-51-pf1  
 EXPNO 2  
 PROCNO 1

F2 - Acquisition Parameters  
 Date\_ 20051108  
 Time 16.19  
 INSTRUM spect  
 PROBHD 5mm BBO BB-1  
 PULPROG zgpg30  
 TD 65536  
 SOLVENT COC13  
 NS 103  
 DS 4  
 SMH 24875.621 Hz  
 FIDRES 0.379572 Hz  
 AQ 1.3173236 sec  
 RG 1024  
 DW 20.100 usec  
 DE 6.00 usec  
 TE 300.0 K  
 D1 2.00000000 sec  
 d11 0.03000000 sec  
 d12 0.00002000 sec

- 166.687
- 149.211
- 145.040
- 134.465
- 131.857
- 128.244
- 127.311
- 126.054
- 123.670
- 119.484
- 118.811
- 77.544
- 77.226
- 76.908
- 74.988
- 43.094
- 6.961
- 4.962

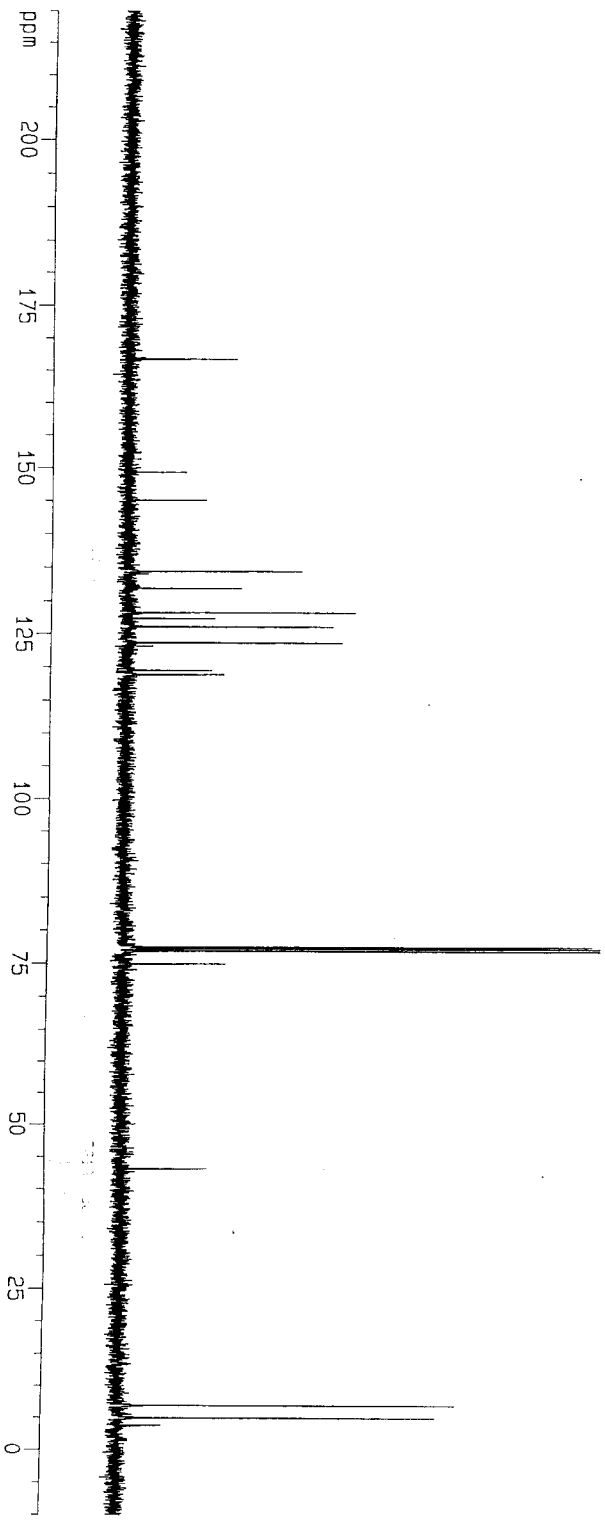

----- CHANNEL f1 -----  
 NUC1 13C  
 P1 15.25 usec  
 PL1 3.00 dB  
 SFO1 100.6237959 MHz

----- CHANNEL f2 -----  
 CPDPRG2 waltz16  
 NUC2 1H  
 PUP02 107.50 usec  
 PL2 0.00 dB  
 PL12 24.00 dB  
 PL13 24.00 dB  
 SFO2 400.1316005 MHz

F2 - Processing parameters  
 SI 32768  
 SF 100.6127529 MHz  
 WDW EM  
 SSB 0  
 LB 1.00 Hz  
 GB 0  
 PC 1.40

1D NMR plot parameters  
 CX 20.00 cm  
 F1P 220.000 ppm  
 F1 22134.80 Hz  
 F2P -10.000 ppm  
 F2 -1006.13 Hz  
 PPMCM 11.50000 ppm/cm  
 HZCM 1157.04663 Hz/cm

NY-8-113-A.pdf

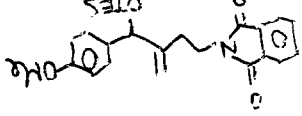

A-pdt

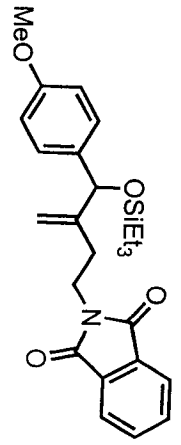

4b

Current Data Parameters  
 NAME ny-8-113-a.pdf  
 EXNO 11  
 PROCNO 1

F2 - Acquisition Parameters  
 Date 20060210  
 Time 18:23  
 INSTRUM spect  
 PROBRD Smm BRD BR-1  
 PULPROG zg30  
 TD 65536  
 SOLVENT DMS-D<sub>6</sub>  
 DS 4  
 DE 2  
 SFO 8278.146 Hz  
 FIDRES 0.42834 Hz  
 AQ 3.558443 sec  
 RG 128  
 DM 60.400 usac  
 DE 6.00 usac  
 TE 300.0 K  
 D1 1.00000000 sec

\*\*\*\*\* CHANNEL f1 \*\*\*\*\*  
 NUC1 1H  
 P1 7.50 usac  
 PL1 0.00 dB  
 SFO1 400.1362710 MHz

F2 - Processing parameters  
 SI 32768  
 SF 400.136016 MHz  
 MDW 0  
 SSB 0  
 LB 0.30 Hz  
 GB 0  
 PC 1.00

1D NMR plot parameters  
 CX 24.00 cm  
 F1P 10.500 DDM  
 F1 4201.36 Hz  
 F2 -0.500 ppm  
 F2 200.07 Hz  
 PRNCH 0.42833 ppm/cm  
 HZCN 133.3521 Hz/cm

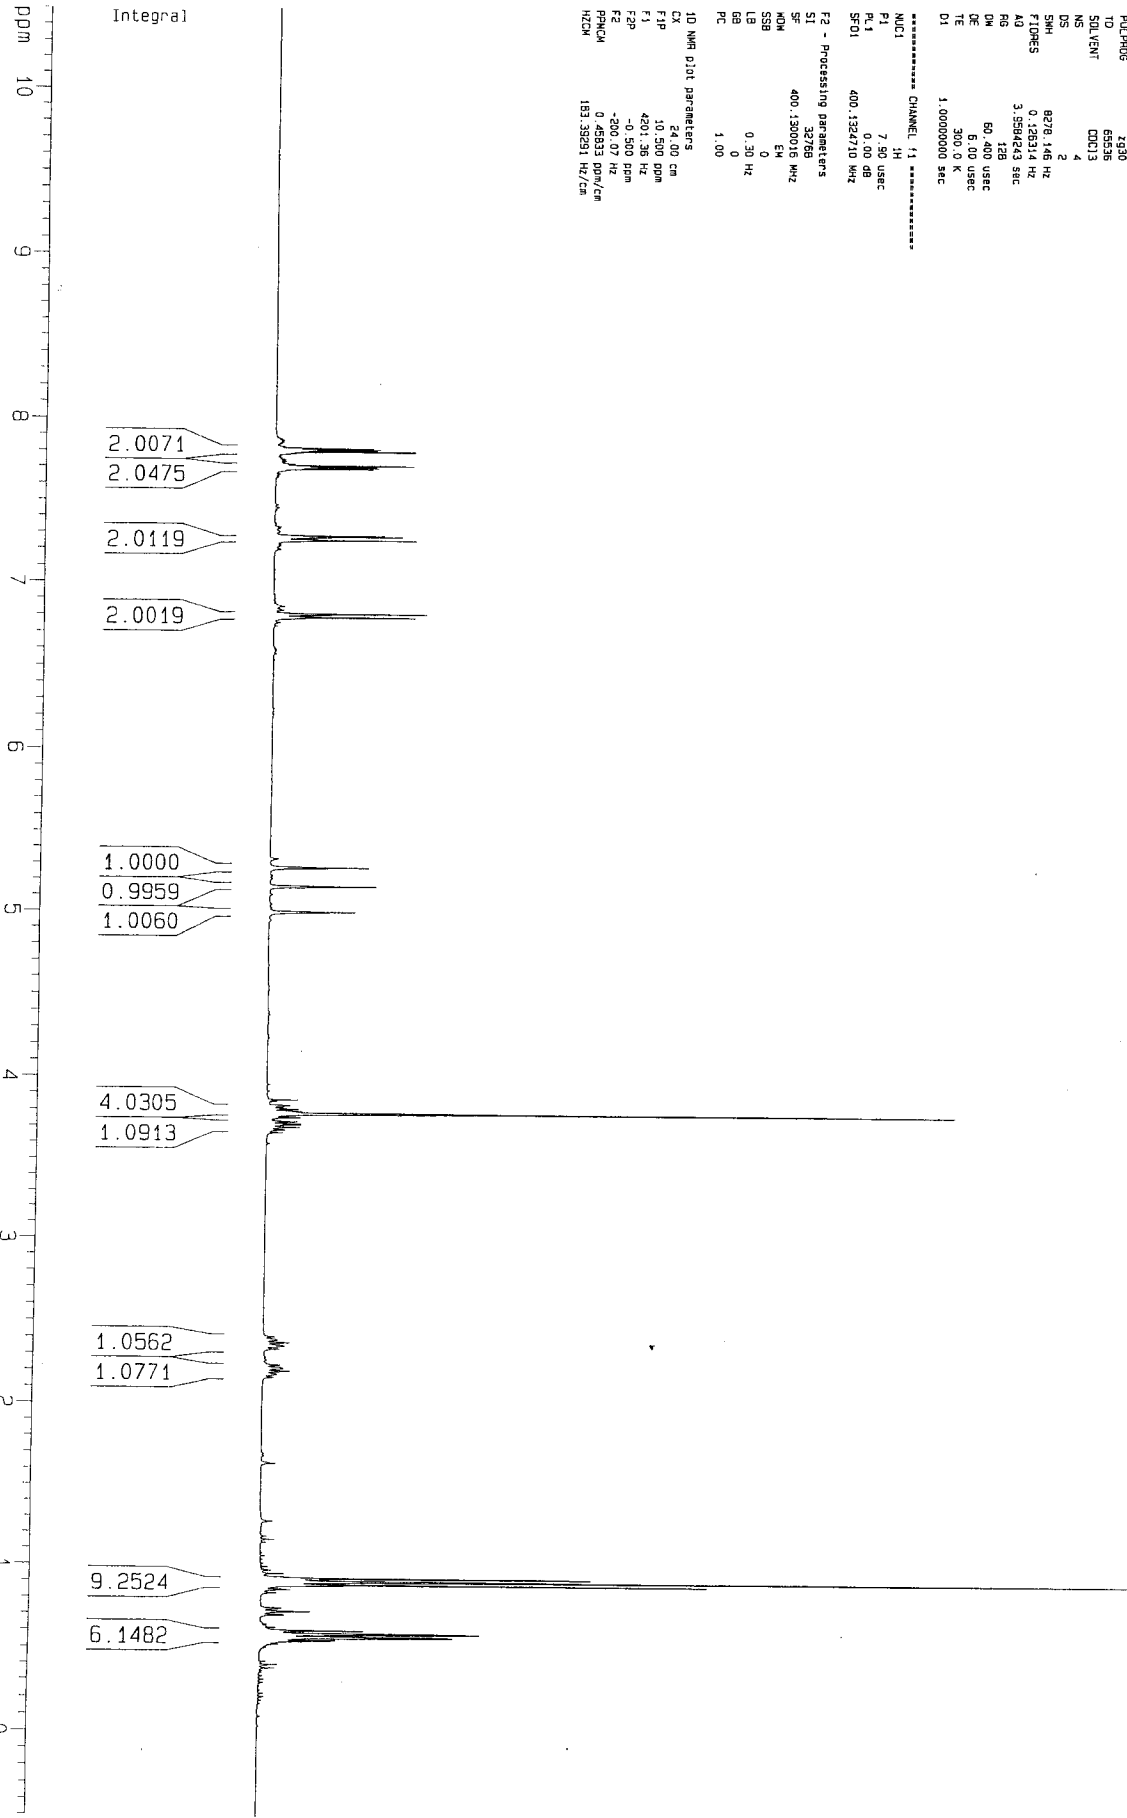

A-pdt

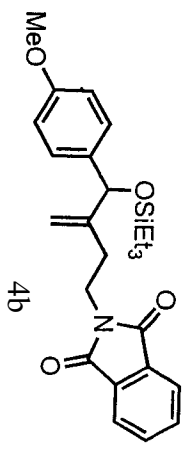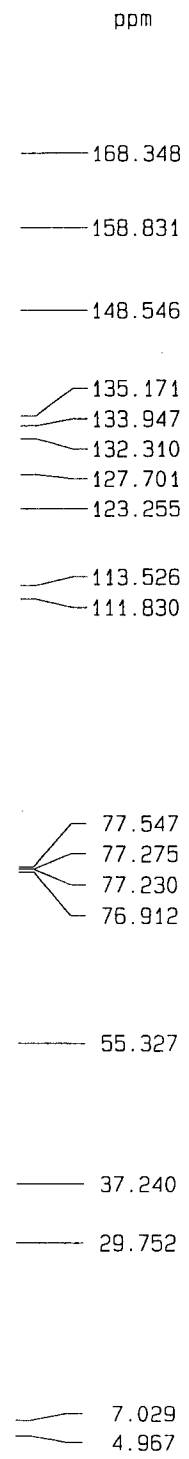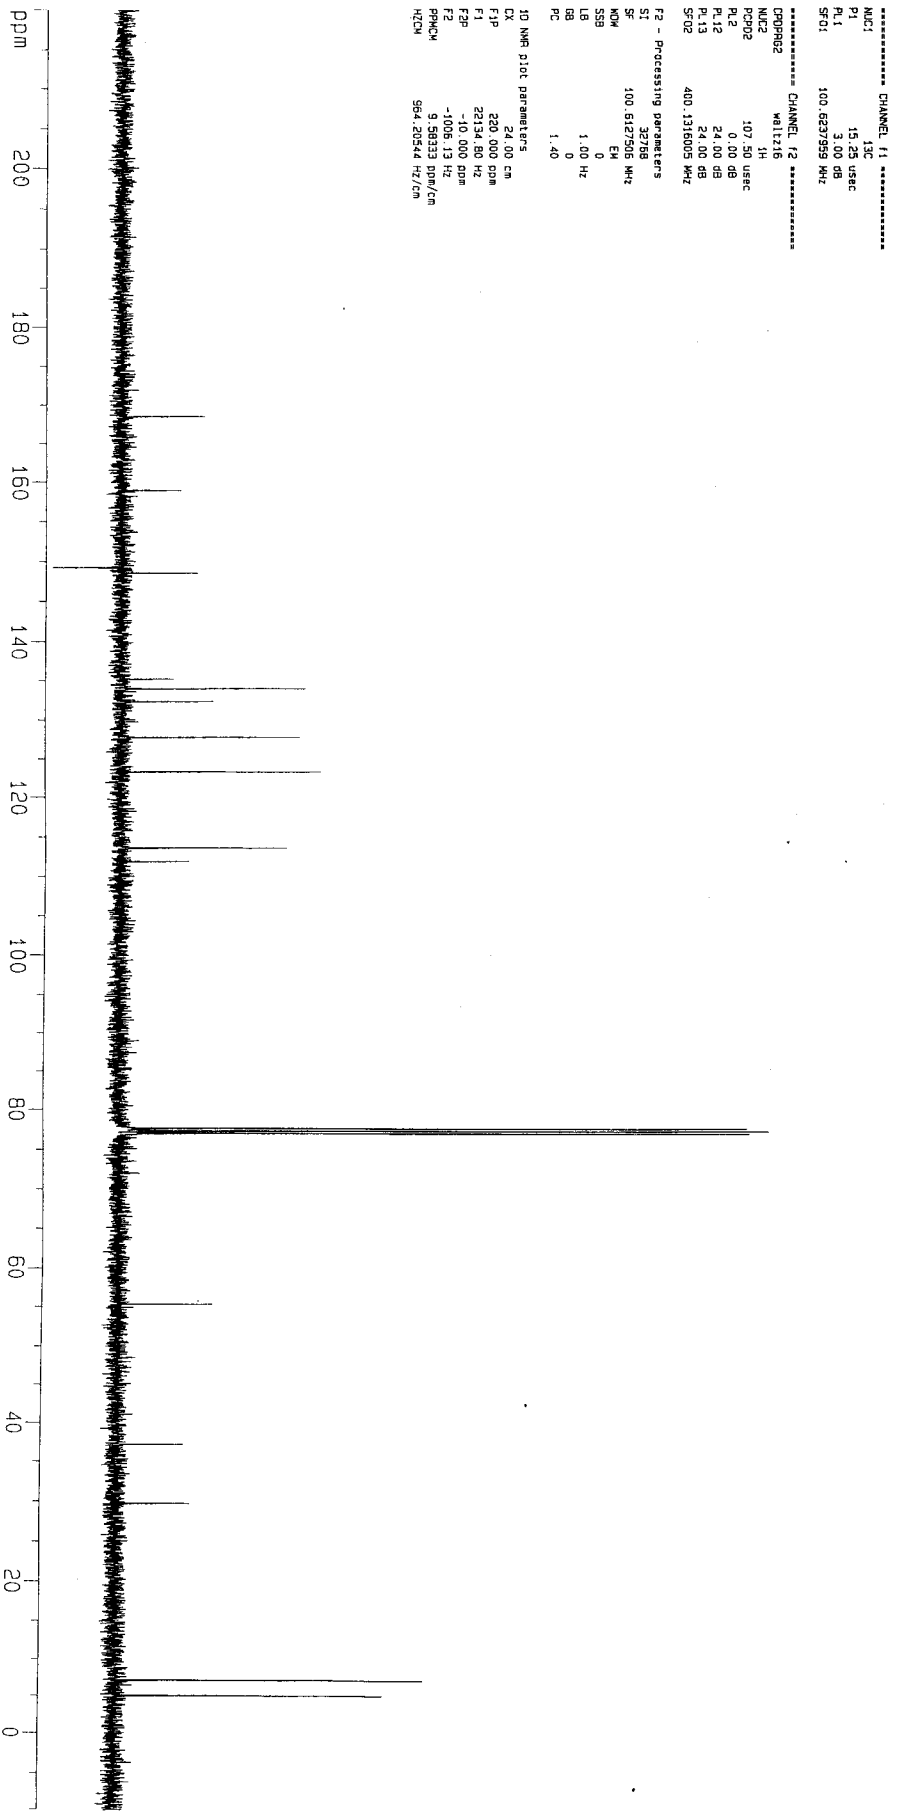

```

Current Data Parameters
NAME      NCV8-113-Apdt
EXPNO    22
PROCNO   1
F2 - Acquisition Parameters
Date_    20060210
Time     19:28
INSTRUM  spect
PROBHD   5mm BBO
PULPROG  zgpg30
TD        65536
SOLVENT  CDCl3
NS        127
DS        4
SHE      24875.621 Hz
FIDRES   0.379572 Hz
AQ        1.3172285 sec
RG        1024
DM        20.100 usec
DE        6.00 usec
TE        300.2 K
D1        2.000000 sec
d11       0.02000000 sec
d12       0.00020000 sec

***** CHANNEL f1 *****
NUC1      13C
P1        15.25 usec
PL1       3.00 dB
SFO1     100.6273599 MHz

***** CHANNEL f2 *****
CPDPRG2  waltz16
NUC2      1H
PCPD2    107.50 usec
PL2       0.00 dB
PL12     24.00 dB
PL13     24.00 dB
SFO2     400.1318003 MHz

F2 - Processing parameters
SI        32768
SF        100.627505 MHz
MDW       EM
SSB       0
LB        1.00 Hz
GB        0
PC        1.40

1D NMR plot parameters
CX        24.00 cm
F1P       220.000 GHz
F2P       221.500 MHz
F3P       221.500 MHz
F4P       221.500 MHz
F2 - 1006.13 Hz
PPMCH    9.98333 Hz/cm
KZCN     564.20544 Hz/cm
  
```

104-8-97-2

H pdt TES deprotection

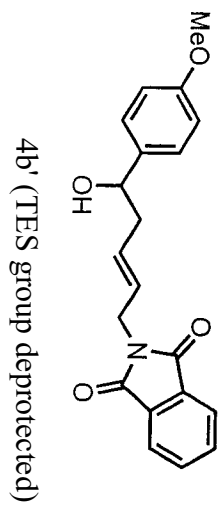

Current Data Parameters  
 NAME hc18-97de-1pdt  
 EXPNO 1  
 PROCNO 1

F2 - Acquisition Parameters  
 Date\_ 2008123  
 Time 12:38  
 INSTRUM spect  
 PROBRD 5mm BBO BB-1  
 PULPROG zgpg30  
 TD 65536  
 SOLVENT CDCl3  
 NS 5  
 DS 2  
 SWH 8278.148 Hz  
 FIDRES 0.128314 Hz  
 AQ 3.9584243 sec  
 RG 181  
 DW 60.400 usec  
 DE 6.00 usec  
 TE 300.0 K  
 D1 1.00000000 sec

\*\*\*\*\* CHANNEL f1 \*\*\*\*\*  
 NUCL1 13C  
 P1 7.50 usec  
 PL1 0.00 dB  
 SF01 400.1324710 MHz

F2 - Processing parameters  
 SI 32768  
 SF 400.1300016 MHz  
 MD 64  
 EM 1  
 SSF 0  
 LB 0.30 Hz  
 GB 0  
 PC 1.00

1D NMR plot parameters  
 CX 324.00 cm  
 F1P 10.500 ppm  
 F1 4201.36 Hz  
 F2P -0.500 ppm  
 F2 -200.07 Hz  
 PRPCK 0.45833 ppm/cm  
 HZCM 183.39291 Hz/cm

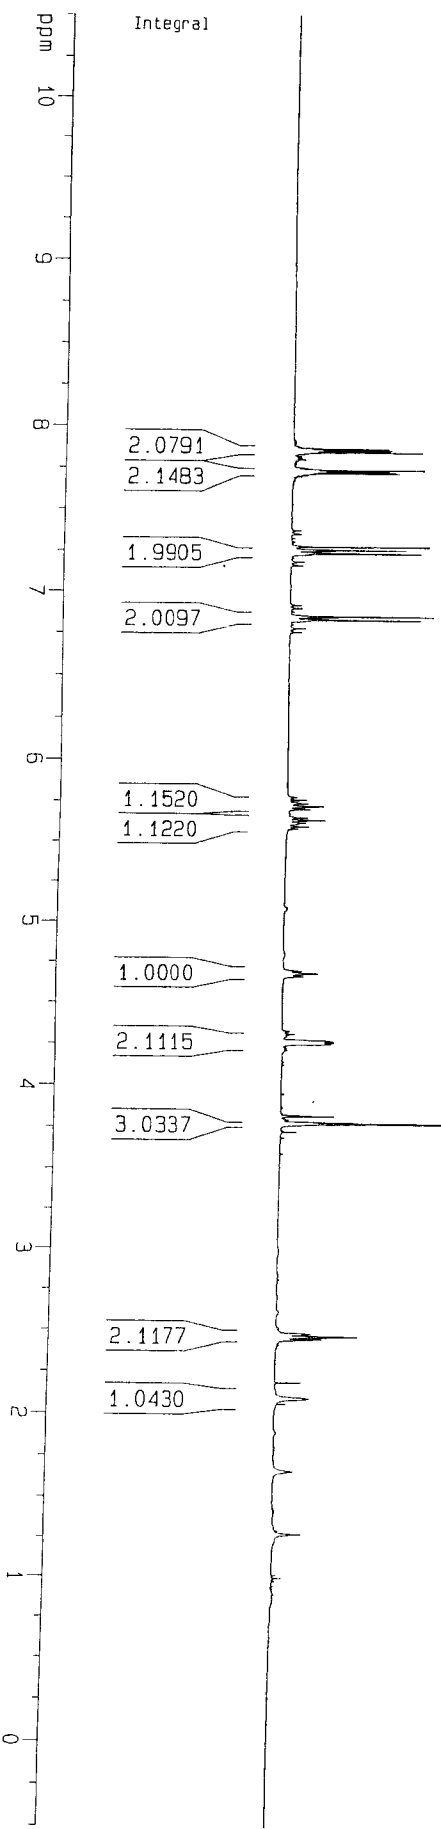

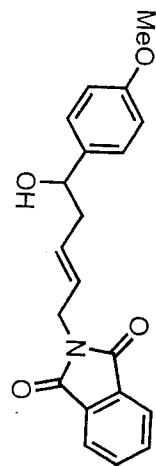

4b' (TES group deprotected)

- 77.523
- 77.410
- 77.205
- 76.888
- 73.124
- 55.410
- 42.328
- 39.724

- 168.173
- 159.126
- 136.046
- 134.137
- 132.282
- 130.787
- 127.192
- 127.139
- 123.459
- 113.885

ppm

Current Data Parameters  
 NAME hcy8-57de-Hot  
 EXPNO 2  
 PROCNO 1

F2 - Acquisition Parameters  
 Date\_ 20060425  
 Time 15.44  
 INSTRUM spect  
 PROBRD 5mm BBO BB-1  
 PULPROG zgpg30  
 TO 65536  
 SOLVENT CDCl3  
 NS 179  
 DS 4  
 SH 4  
 FIDRES 24875.621 Hz  
 0.379572 Hz  
 1.3173236 sfc  
 AQ 0.0  
 FWH 20.1024  
 DM 20.1024  
 DE 4.00 usfc  
 TE 300.0 K  
 D1 2.0000000 sec  
 d11 0.0300000 sec  
 d12 0.0000200 sec

\*\*\*\*\* CHANNEL f1 \*\*\*\*\*  
 NUC1 13C  
 P1 15.25 usfc  
 PL1 3.00 dB  
 SF01 100.6237559 MHz

\*\*\*\*\* CHANNEL f2 \*\*\*\*\*  
 CHOPRG2 waltz16  
 NUC2 1H  
 P2P2 107.50 usfc  
 PL2 0.00 dB  
 PL12 24.00 dB  
 PL13 24.00 dB  
 SF02 400.1318005 MHz

F2 - Processing parameters  
 SI 32768  
 SF 100.6127559 MHz  
 MM EM  
 SS 0  
 LB 1.00 Hz  
 GB 0  
 PC 1.40

JD NMR plot parameters  
 CX 24.00 cm  
 FIP 220.000 ppm  
 F1 22134.89 Hz  
 F2 -10.000 ppm  
 F2 -1006.13 Hz  
 FWH 9.58333 ppm/cm  
 HZCM 584.20551 Hz/cm

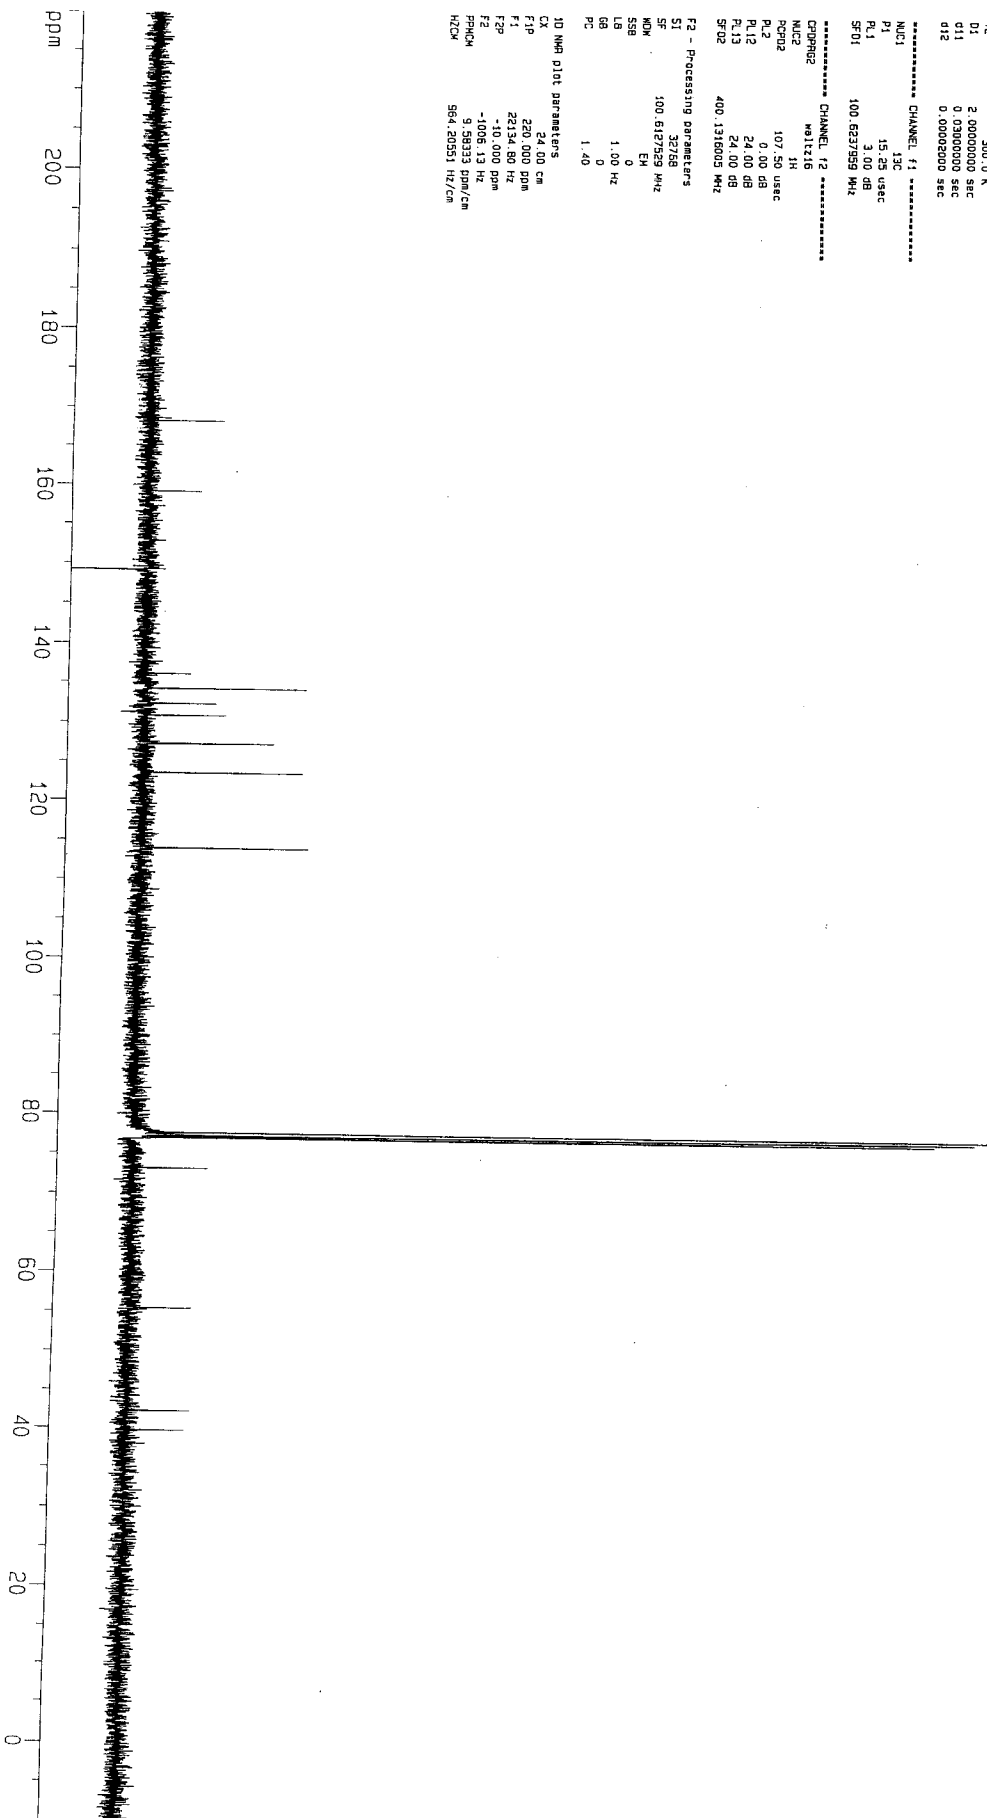

A-pdt

4c

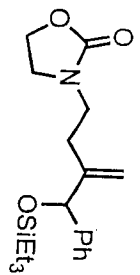

Current Data Parameters  
NAME NCP-763711  
EXPNO 1  
PROCNO 1

F2 - Acquisition Parameters  
Date\_ 20051219  
Time 13.21  
INSTRUM spect  
PROBHD 5mm BBO BB-1  
PULPROG zg30  
SI 65535  
SOLVENT CDCl<sub>3</sub>  
NS 5  
DS 2  
SWH 8328.448 Hz  
FIDRES 0.12637 Hz  
AQ 3.9584243 sec  
RG 90.5  
DM 60.400 usec  
DE 6.00 usec  
TE 300.0 K  
D1 1.00000000 sec

\*\*\*\*\* CHANNEL f1 \*\*\*\*\*  
NUC1 1H  
P1 7.50 usec  
SFO 400.1264710 MHz

F2 - Processing parameters  
SI 32768  
SF 400.130016 MHz  
KOV 0  
SFB 0  
LB 0.30 Hz  
GB 0  
PC 1.00

10 NMR p1dt parameters  
CX 24.00 cm  
F1P 10.500 ppm  
F1ZP 4201.38 Hz  
F2 -0.500 ppm  
F3 200.01 Hz  
PRMCM 0.50523 ppm/cm  
HZCM 183.35231 Hz/cm

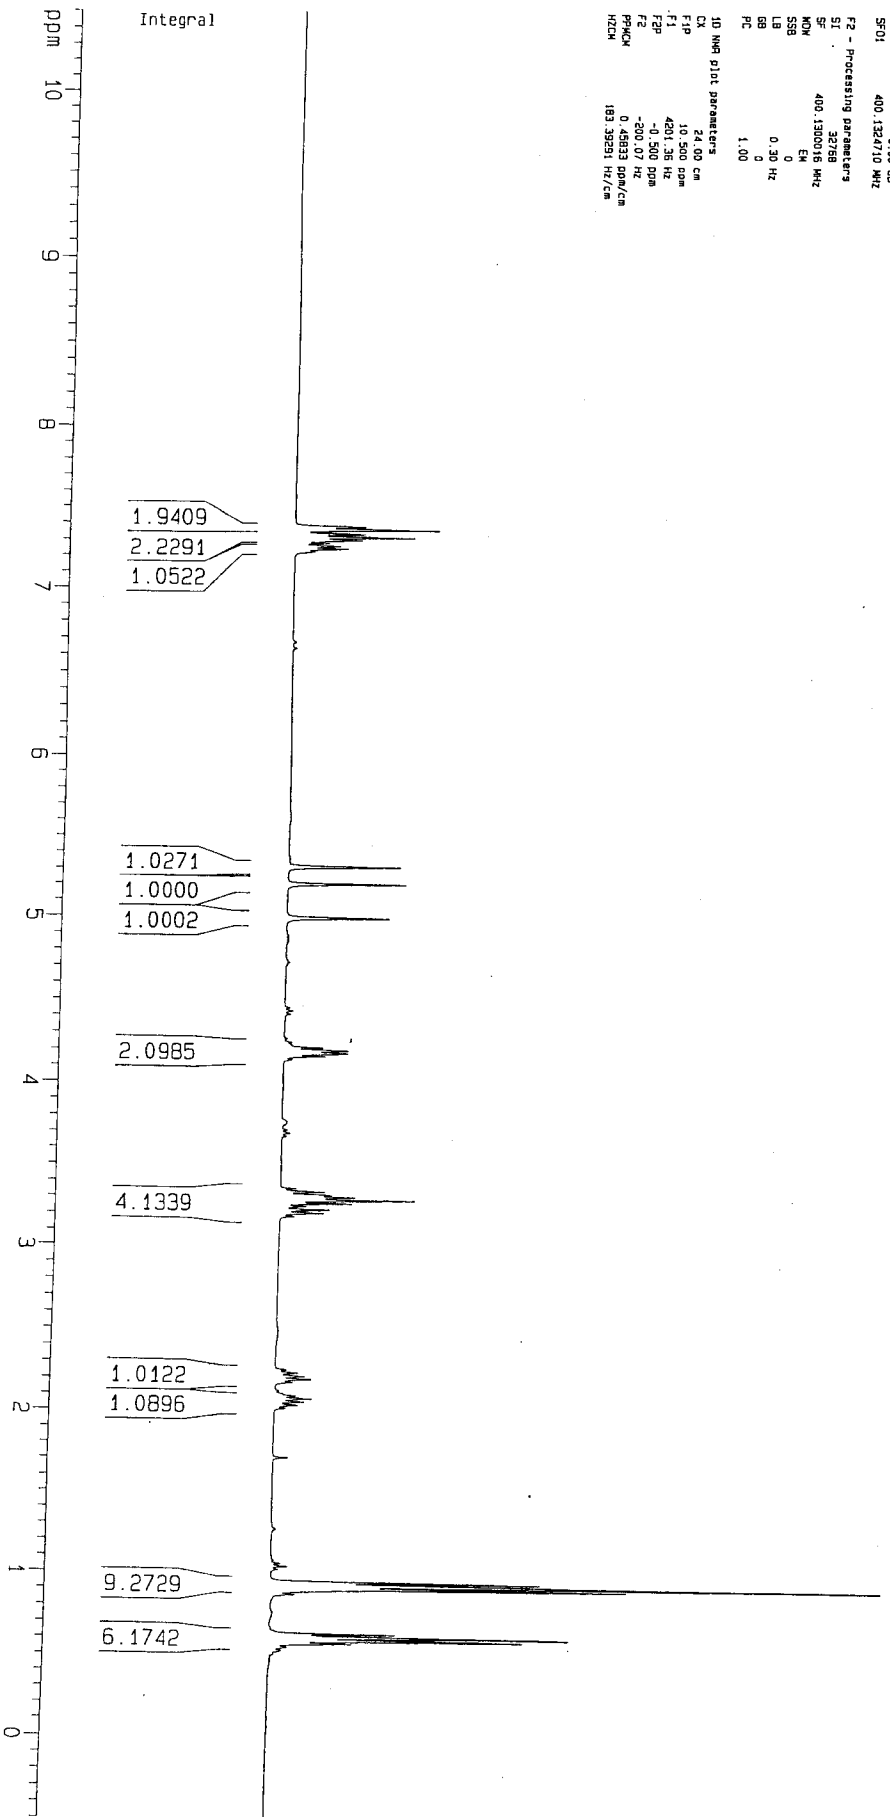

A-ddt

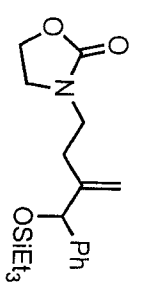

Current Data Parameters  
 NAME: M518-18cyl1  
 EXPNO: 2  
 PROCNO: 1

F2 - Acquisition Parameters  
 Date\_ 20051219  
 Time 13.25  
 INSTRUM spect  
 PROBRD 5mm BBO BB-1  
 PULPROG zgpg30  
 TO 65536  
 SOLVENT CDCl3  
 NS 101  
 DS 4  
 SH 4  
 FIDRES 24079.821 Hz  
 AQ 0.379572 Hz  
 F1 1.317225 sec  
 DW 1024  
 DE 20.00 usec  
 TE 300.0 K  
 D1 2.0000000 sec  
 d11 0.0300000 sec  
 d12 0.0002000 sec

\*\*\*\*\* CHANNEL f1 \*\*\*\*\*  
 NUC1 13C  
 P1 15.25 usec  
 PL1 3.00 dB  
 SFO1 100.6277959 MHz

\*\*\*\*\* CHANNEL f2 \*\*\*\*\*  
 GPROBRD zgpg30  
 NUC2 1H  
 P2 107.50 usec  
 PL2 0.00 dB  
 PL12 24.00 dB  
 PL13 24.00 dB  
 SFO2 400.1315005 MHz

F2 - Processing parameters  
 SI 32768  
 SF 100.6127529 MHz  
 KW 64  
 EM 0  
 SSB 0  
 GB 1.00 Hz  
 PC 1.40

1D NMR plot parameters  
 CX 24.00 cm  
 FIP 220.000 ppm  
 F1 22134.80 Hz  
 F2P -10.000 ppm  
 F2 -1006.13 Hz  
 PPKCM 9.58333 ppm/cm  
 HZCM 964.20551 Hz/cm

- 158.419
- 148.100
- 143.060
- 128.215
- 127.347
- 126.281
- 111.991
- 78.133
- 77.545
- 77.227
- 76.909
- 61.767
- 44.257
- 42.823
- 27.929
- 6.999
- 4.942

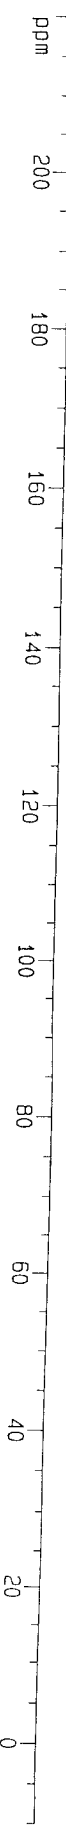



H-pdt, TES deprotection

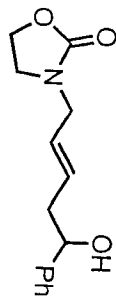

4c'

Current Data Parameters  
 NAME hc9b-77de-H  
 EXPNO 1  
 PROCNO 1

F2 - Acquisition Parameters  
 Date\_ 20051221  
 Time 9:27  
 F1 500.1362710 MHz  
 PULPROG sm 880 88-1  
 PL1 88-1  
 TO 65538  
 SOLVENT CDCl3  
 NS 6  
 DS 2  
 SWH 8278.146 Hz  
 FIDRES 0.126314 Hz  
 AQ 3.9584243 sec  
 RG 228.1  
 DM 60.400 usec  
 DE 6.00 usec  
 TE 300.0 K  
 D1 1.00000000 sec

\*\*\*\*\* CHANNEL f1 \*\*\*\*\*  
 NUC1 1H  
 P1 7.50 usec  
 PL1 0.00 dB  
 SFO1 400.1326710 MHz

F2 - Processing parameters  
 SI 32768  
 SF 400.1300015 MHz  
 KW 4  
 SSF 0  
 LB 0.30 Hz  
 GB 0  
 PC 1.00

JD NMR Plot Parameters  
 CX 24.00 cm  
 F1P 10.500 ppm  
 F1 4201.37 Hz  
 F2P -0.500 ppm  
 F2 -200.07 Hz  
 PPHZ 0.45833 ppm/cm  
 HZCM 183.39291 Hz/cm

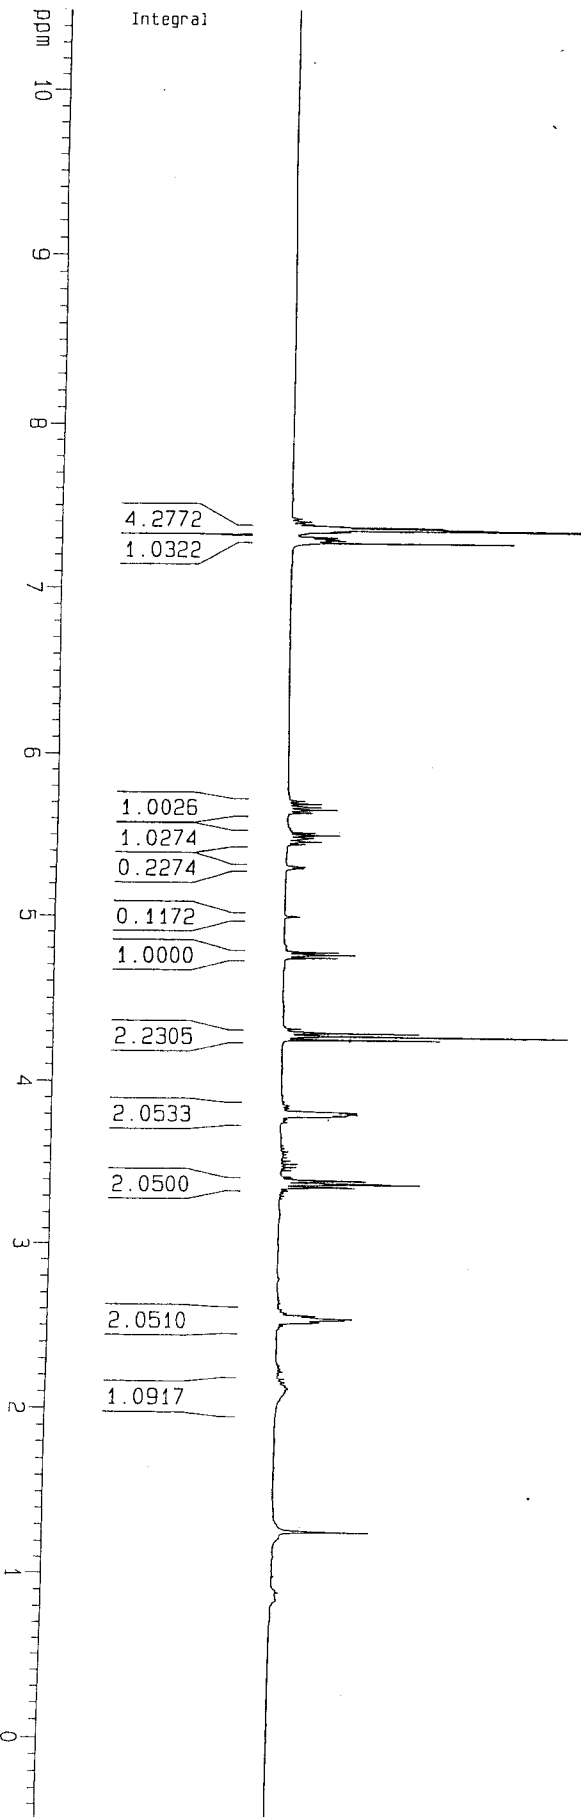

H-pdt, TES deprotection

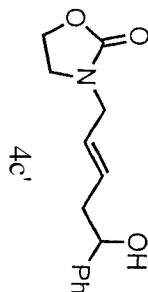

Current Data Parameters  
 NAME hcj98-77de-H  
 EXPNO 28  
 PROCNO 1

F2 - Acquisition Parameters  
 Date\_ 20051221  
 Time 9:31  
 INSTRUM spect  
 PARMNO 5mm BBO BB-1  
 F1 289.50  
 TD 65536  
 SFO1 119.0  
 SOLVENT CDCl3  
 NS 1190  
 DS 4  
 SWH 24875.621 Hz  
 FIDRES 0.379572 Hz  
 AQ 1.3172326 sec  
 RG 512  
 DW 28.100 usec  
 DE 6.00 usec  
 TE 300.0 K  
 D1 2.0000000 sec  
 d11 0.0300000 sec  
 d12 0.0000000 sec

\*\*\*\*\* CHANNEL f1 \*\*\*\*\*  
 NUC1 13C  
 P1 15.25 usec  
 PL1 3.00 dB  
 SFO1 100.627959 MHz

\*\*\*\*\* CHANNEL f2 \*\*\*\*\*  
 CPDPRG2 waltz16  
 NUC2 1H  
 PCPD2 107.50 usec  
 PL2 0.00 dB  
 PL12 24.00 dB  
 PL13 24.00 dB  
 SFO2 400.1316005 MHz

F2 - Processing Parameters  
 SF 400.1316005 MHz  
 DS 4  
 NDKM 100.6127529 MHz  
 SSB 0  
 EQ 0  
 LB 1.00 Hz  
 GB 0  
 PC 1.40

10 NMR plot parameters  
 CX 24.00 cm  
 FIP 220.000 ppm  
 F1 22134.80 Hz  
 F2 -10.000 ppm  
 F2P -1006.13 Hz  
 FREQH 9.58333 ppm/cm  
 FWHM 504.20051 Hz/cm

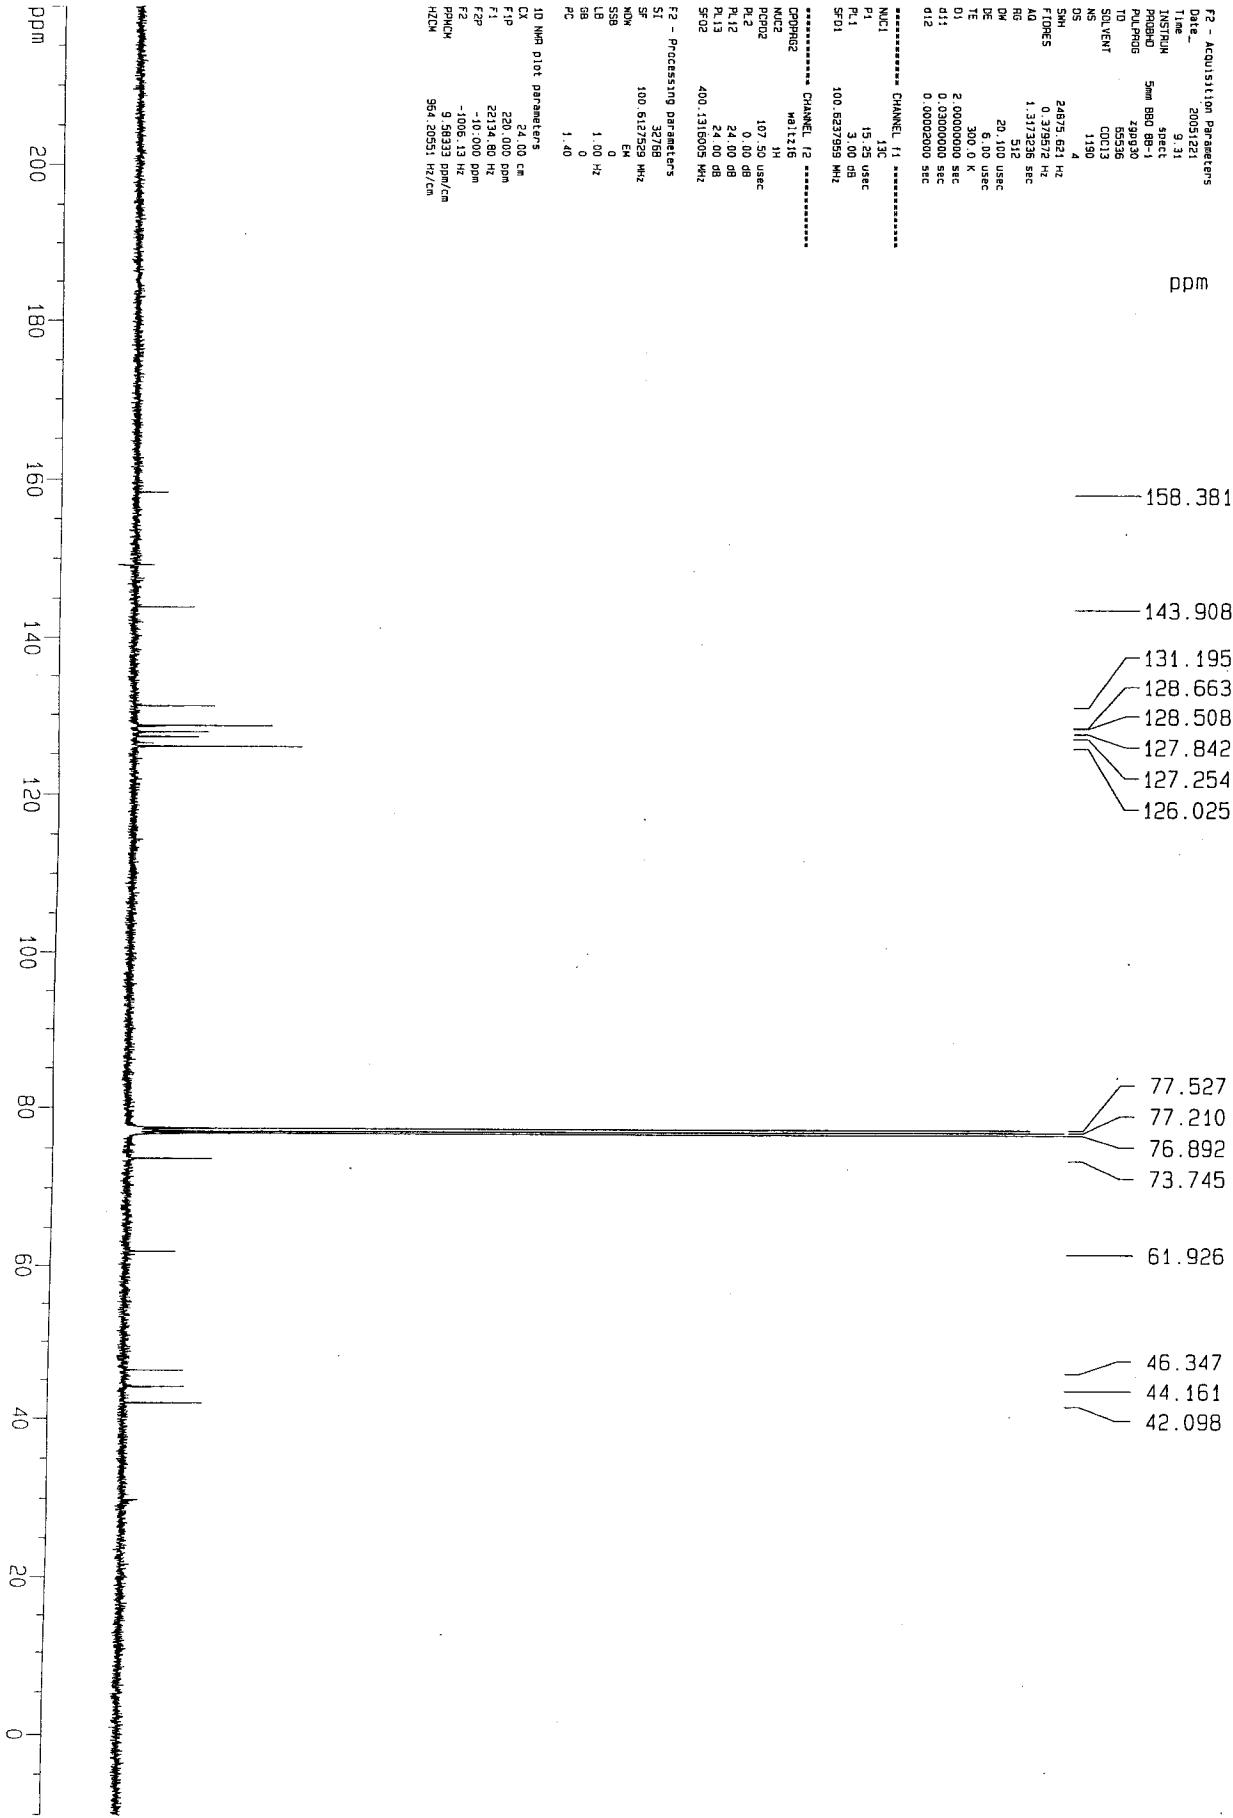

104-8-24 deprotection  
TMS

Current Data Parameters  
NAME: ncy8-7de-4dct  
EXPNO: 1  
PROCNO: 1

F2 - Acquisition Parameters  
Date\_: 20051215  
Time: 12.09  
INSTRUM: spect  
PROBHD: Spin BB6 BB-1  
PULPROG: zgpg30  
TD: 65536  
SOLVENT: CDCl3  
NS: 2  
DS: 2  
SWH: 6278.146 Hz  
FIDRES: 0.126314 Hz  
AQ: 3.5984243 sec  
RG: 382  
OR: 60.400 usec  
DE: 5.00 usec  
TE: 300.0 K  
D1: 1.00000000 sec

CHANNEL f1  
NUC1: 1H  
P1: 7.50 usec  
PL1: 0.00 dB  
SFO1: 400.1324710 MHz

F2 - Processing parameters  
SI: 32768  
SF: 400.1300015 MHz  
WDW: EM  
SSB: 0  
LB: 0.30 Hz  
GB: 0  
PC: 1.00

10 NMR plot parameters  
C4: 24.00 cm  
F4: 10.500 ppm  
F1: 4201.37 Hz  
F2: -20.000 ppm  
PH0H: 0.46833 Hz/cm  
HZ0H: 183.35291 Hz/cm

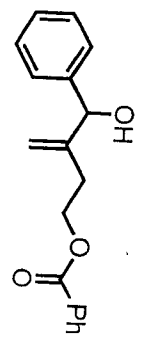

Desilylated 4c'

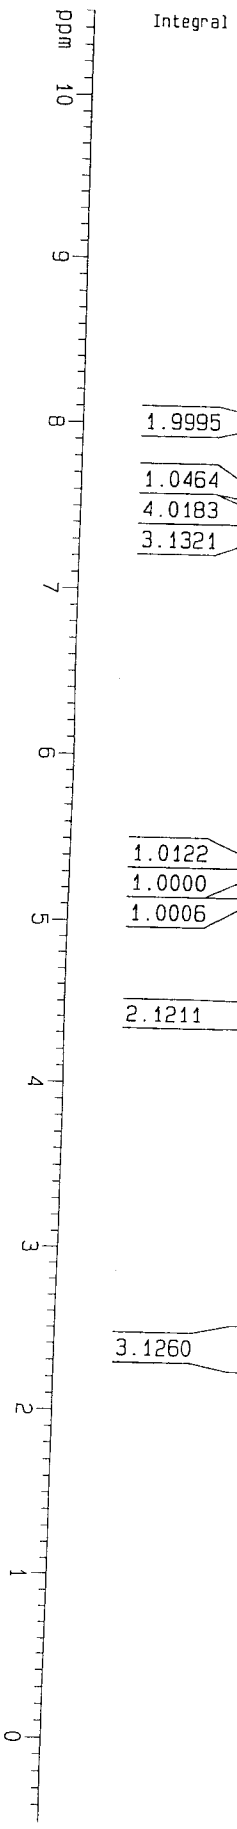

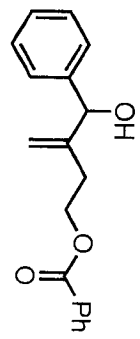

Current Data Parameters  
 NAME: hc9b-74de-4dot  
 EXPNO: 2  
 PROCNO: 1

F2 - Acquisition Parameters  
 Date\_: 20051215  
 Time: 12.12  
 INSTRUM: spect  
 PROBHD: 5mm BBO BB-1  
 PULPROG: zgpg30  
 TO: 65536  
 SOLVENT: CDCl3  
 NS: 1397  
 DS: 4  
 SWH: 24875.624 Hz  
 FIDRES: 0.37872 Hz  
 AQ: 1.312630 sec  
 RG: 327  
 DE: 20.100 usec  
 TE: 300.0 K  
 D1: 2.00000000 sec  
 d11: 0.03000000 sec  
 d12: 0.00000000 sec

\*\*\*\*\* CHANNEL f1 \*\*\*\*\*  
 NUCL: 13C  
 P1: 15.25 usec  
 PL1: 3.00 dB  
 SFO1: 100.6227959 MHz

\*\*\*\*\* CHANNEL f2 \*\*\*\*\*  
 CPDPRG2: waltz16  
 NUC1: 1H  
 NUC2: 13C  
 PCPD2: 107.50 usec  
 PL2: 0.00 dB  
 PL12: 24.00 dB  
 PL13: 24.00 dB  
 SFO2: 400.1315005 MHz

F2 - Processing parameters  
 SI: 32768  
 SF: 100.617529 MHz  
 KW: EM  
 SSB: EM  
 LB: 1.00 Hz  
 GB: 0  
 PC: 1.40

1D NMR plot parameters  
 CX: 24.00 cm  
 F1P: 220.000 ppm  
 F1: 221.34 80 Hz  
 F2P: -10.000 ppm  
 F2: -1005.13 Hz  
 PPMCK: 9.56333 ppm/cm  
 KCM: 964.20551 Hz/cm

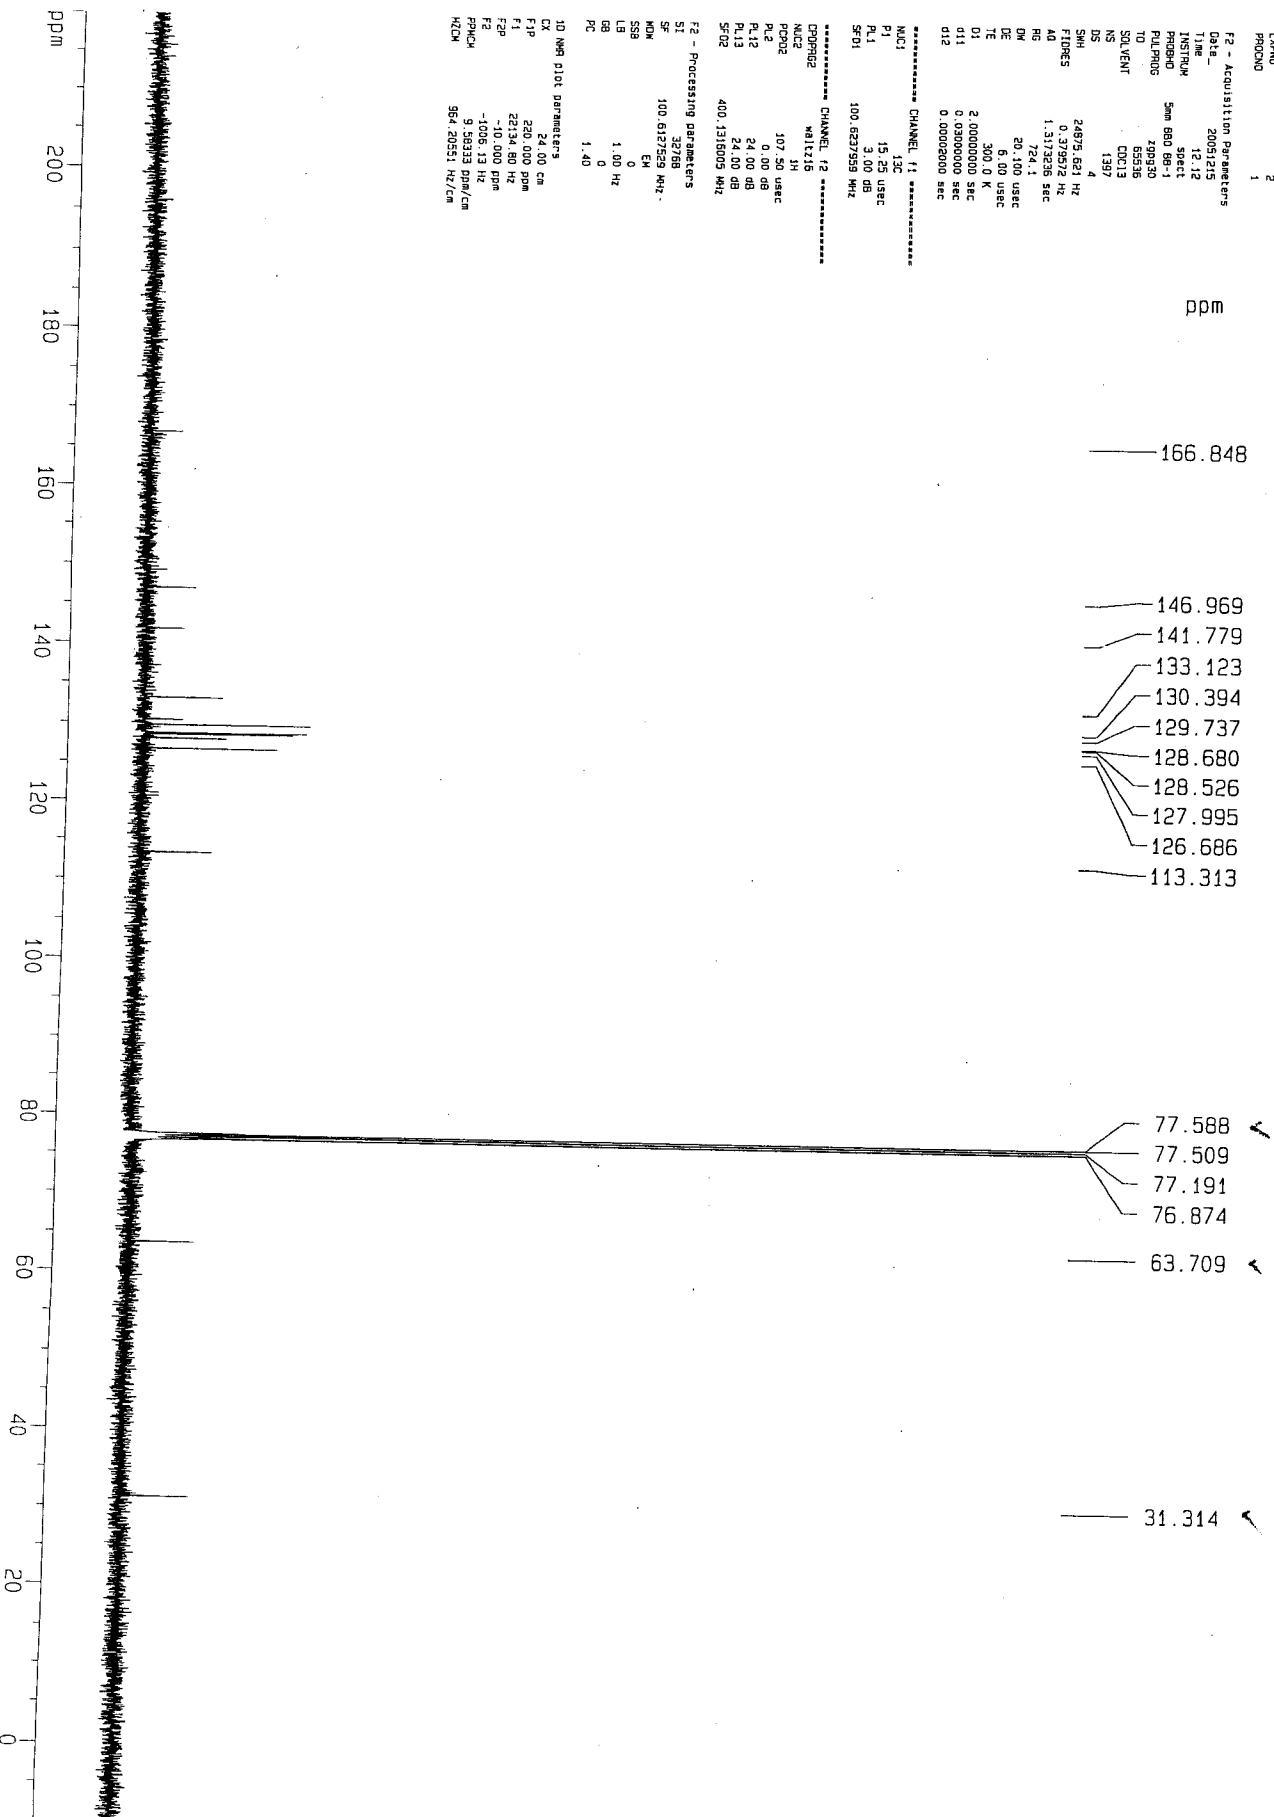

SN050737 allylic and ene

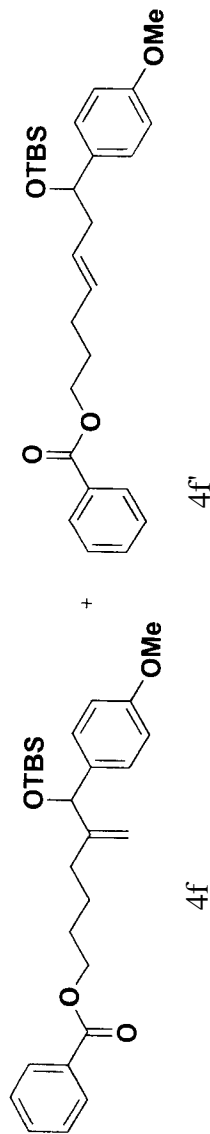

```

Current Data Parameters
NAME      SN736-ajl-C
EXPNO    1
PROCNO   1

F2 - Acquisition Parameters
Date_    20050728
Time     20.16
INSTRUM  spect
PROBHD   5mm BBO BB-1
PULPROG  zgpg30
TD        65536
SOLVENT  CDC13
NS        638
DS        4
SWH       25125.629 Hz
FIDRES    0.383387 Hz
AQ        1.3042164 sec
RG         1625.5
DM        19.900 usec
DE         6.00 usec
TE        300.0 K
D1        2.00000000 sec
d11       0.03000000 sec
d12       0.00002000 sec

===== CHANNEL f1 =====
NUC1      13C
P1        15.25 usec
PL1       3.00 dB
SF01      100.6237959 MHz

===== CHANNEL f2 =====
CPDPRG2   waltz16
NUC2       1H
PCPD2     107.50 usec
PL2       0.00 dB
PL12      24.00 dB
PL13      24.00 dB
SF02      400.1316005 MHz

F2 - Processing parameters
SI        32768
SF        100.6127522 MHz
WDW       EM
SSB       0
LB        1.00 Hz
GB        0
PC        1.40

1D NMR plot parameters
CX        20.00 cm
F1P       200.000 ppm
F1        20122.55 Hz
F2P       -10.000 ppm
F2        -1006.13 Hz
PPMCM     10.50000 ppm/cm
HZCM      1056.43396 Hz/cm
  
```

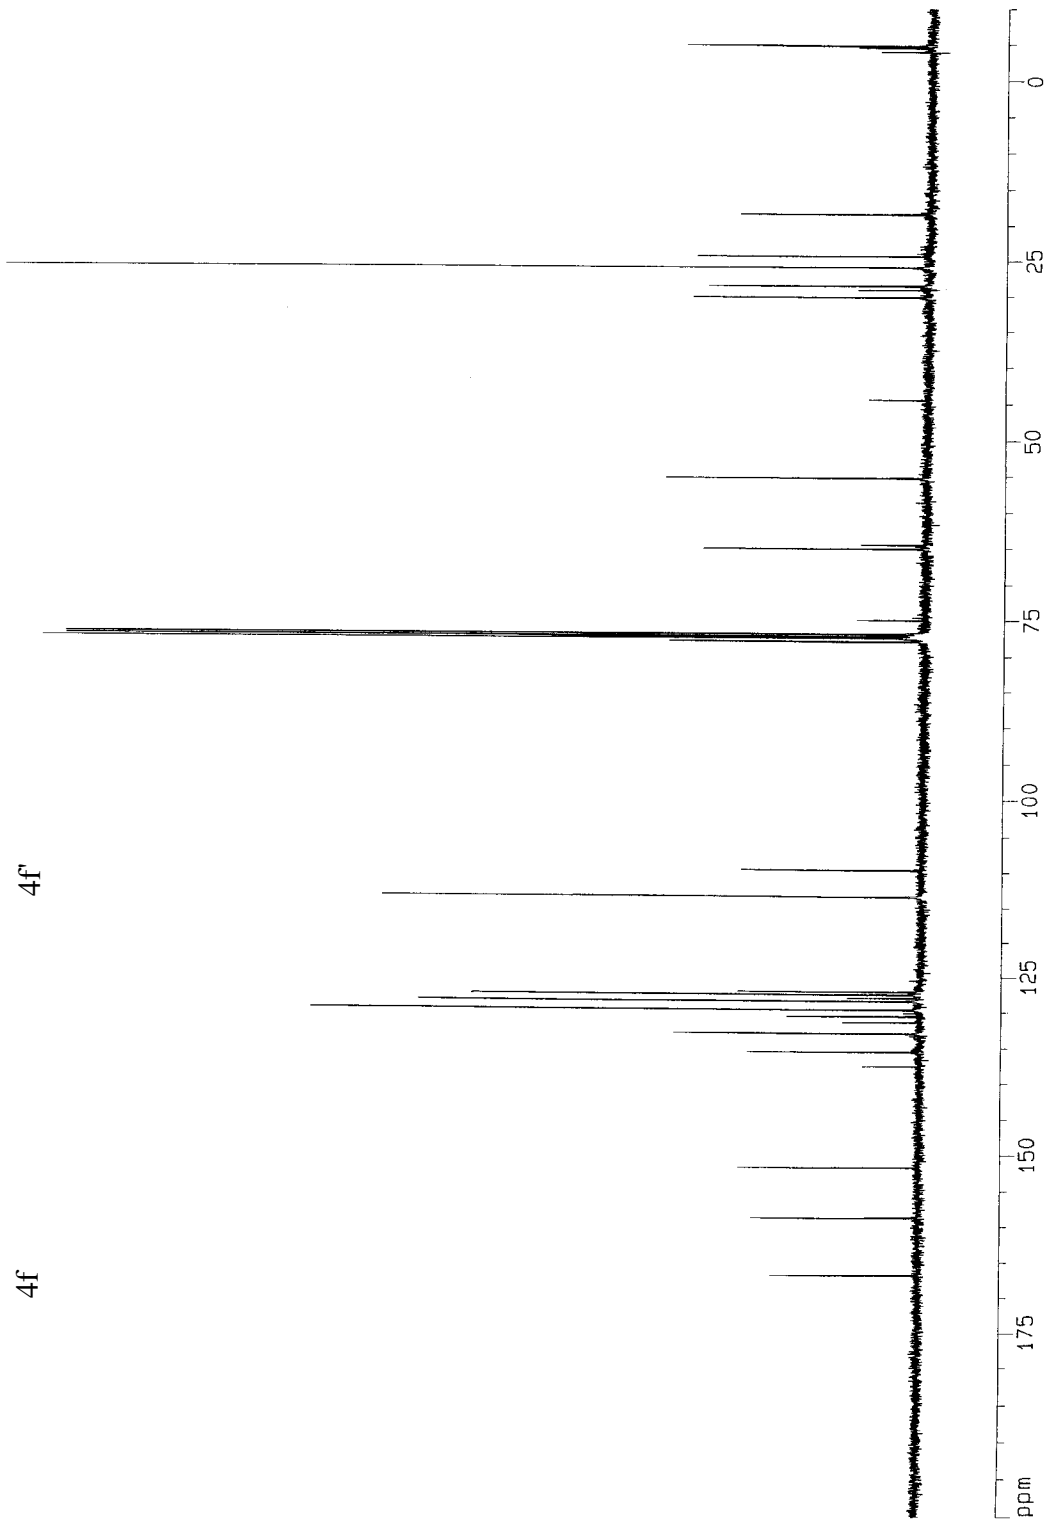

SN050736 allylic and ene

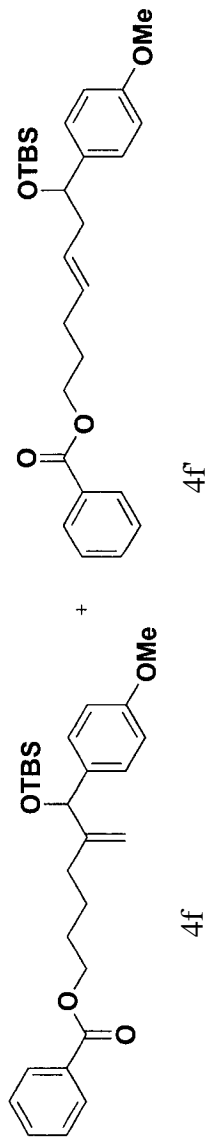

Current Data Parameters  
NAME SN736-ally-H  
EXPNO 1  
PROCNO 1

F2 - Acquisition Parameters  
Date\_ 20050728  
Time 20.11  
INSTRUM spect  
PROBHD 5mm BB0 BB-1  
PULPROG zg30  
TD 65536  
SOLVENT CDCl3  
NS 4  
DS 2  
SWH 8278.146 Hz  
FIDRES 0.126314 Hz  
AQ 3.9584243 sec  
RG 45.3  
DW 60.400 usec  
DE 6.00 usec  
TE 300.0 K  
D1 1.00000000 sec

===== CHANNEL f1 =====  
NUC1 1H  
P1 7.90 usec  
PL1 0.00 dB  
SF01 400.1324710 MHz

F2 - Processing parameters  
SI 32768  
SF 400.1300000 MHz  
WDW EM  
SSB 0  
LB 0.30 Hz  
GB 0  
PC 1.00

1D NMR plot parameters  
CX 20.00 cm  
F1P 10.000 ppm  
F1 4001.30 Hz  
F2P -1.000 ppm  
F2 -400.13 Hz  
PPMCM 0.55000 ppm/cm  
HZCM 220.07150 Hz/cm

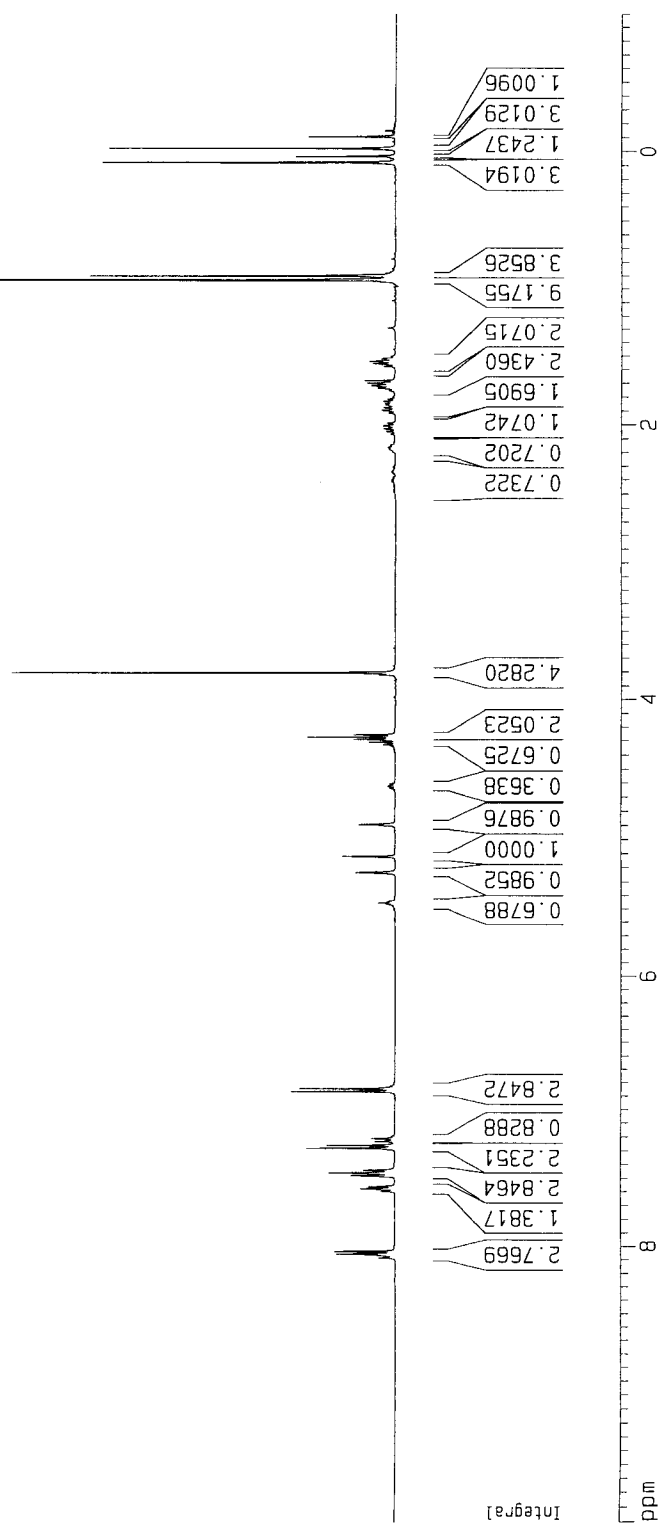

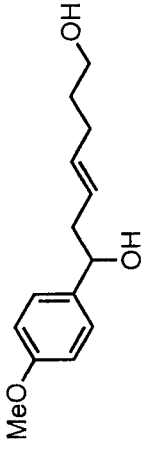

Desilylated 4g

TES deprot H-H-pdt

Current Data Parameters  
 NAME hcy9-150de-H  
 EXPNO 1  
 PROCNO 1  
 F2 - Acquisition Parameters  
 Date\_ 20050404  
 Time 11:35  
 P1 9.86 usec  
 P2 3.00 usec  
 PULPROG zgpg30  
 TD 32768  
 TO 65936  
 SOLVENT CDCl3  
 NS 5  
 DS 1  
 SMH 8278.146 Hz  
 SFORES 0.126314 Hz  
 AQ 3.9584243 sec  
 RG 322.5  
 DM 60.400 usec  
 DE 6.00 usec  
 TE 292.5 K  
 D1 1.0000000 sec  
 ACQRES 0.0000000 sec  
 MCWK 0.0150000 sec  
 \*\*\*\*\* CHANNEL f1 \*\*\*\*\*  
 NUC1 1H  
 P1 9.86 usec  
 PL1 3.00 dB  
 SFO1 400.1324710 MHz  
 F2 - Processing parameters  
 SI 32768  
 SF 400.1300054 MHz  
 MDK EN  
 SSB 0  
 LB 0.30 Hz  
 GB 0  
 PC 1.00  
 F0 NMR plot parameters  
 CY 514.00 cm  
 CX 14.00 cm  
 F1P 10.500 cm  
 F1 4201.36 Hz  
 F2P -0.500 ppm  
 F2 -200.07 Hz  
 PPMCK 0.45835 ppm/cm  
 HZCK 183.39291 Hz/cm

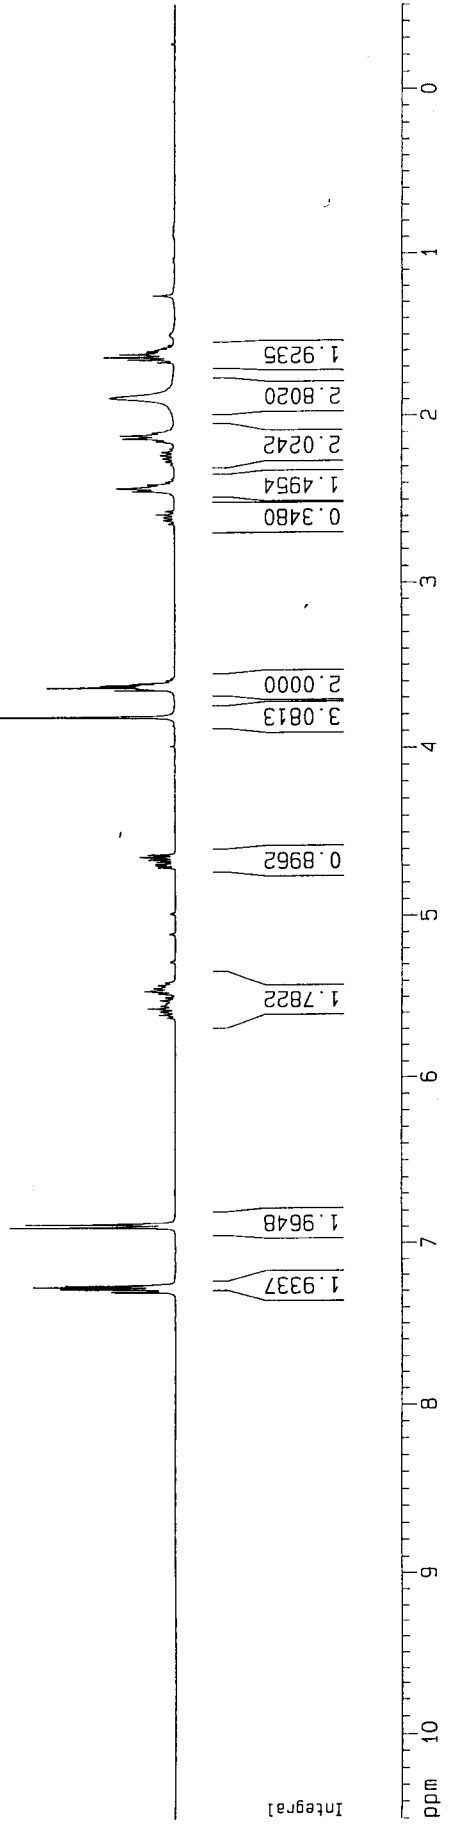

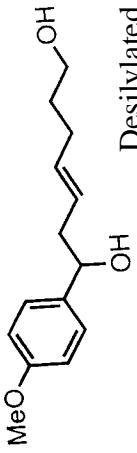

```

Current Data Parameters
Name      mcyl8-150084
EXPNO    2
PROCNO   1
F2 - Acquisition Parameters
Date_    20050404
Time     11.42
INSTRUM spect
PROBHD   5 mm QNP 1H/1
PULPROG zgpg30
TD       65536
SOLVENT  CDCl3
NS       2489
DS       4
SWH      23360.814 Hz
FIDRES   0.365918 Hz
AQ       1.3664778 SEC
RG        320
AQ       20.850 USEC
DE        6.00 USEC
TE       293.7 K
D1       2.00000000 SEC
D11      0.03000000 SEC
DELTA    1.88999999 SEC
MGREST   0.00000000 SEC
MCWRK    0.01500000 SEC

***** CHANNEL f1 *****
NUC1      13C
P1        9.30 USEC
PL1       0.00 DB
SFO1     100.6282680 MHz

***** CHANNEL f2 *****
CPDPRG2  waltz16
NUC2      1H
P2        89.01 USEC
PL2       3.00 DB
PL12     22.00 DB
PL13     22.00 DB
SFO2     400.1316005 MHz

F2 - Processing parameters
SI       32768
SF       100.6177450 MHz
RG        64
KRM      0
SSB      0
LB       1.00 Hz
GB       0
PC       1.40

1D NMR plot parameters
CX       24.00 cm
CY       25.48 cm
FIP      220.000 ppm
F1P      22134.80 Hz
F2P      400.1316005 MHz
PRGM     -10013
PRMCM    9.488332 cm/iter
MCM      96.420544 Hz/cm
  
```

ppm

159.148

136.549

136.408

134.226

132.489

127.236

127.214

126.590

126.121

113.962

113.939

77.540

77.222

76.905

73.674

73.373

62.725

61.957

55.489

42.809

37.324

32.328

32.065

29.540

23.653

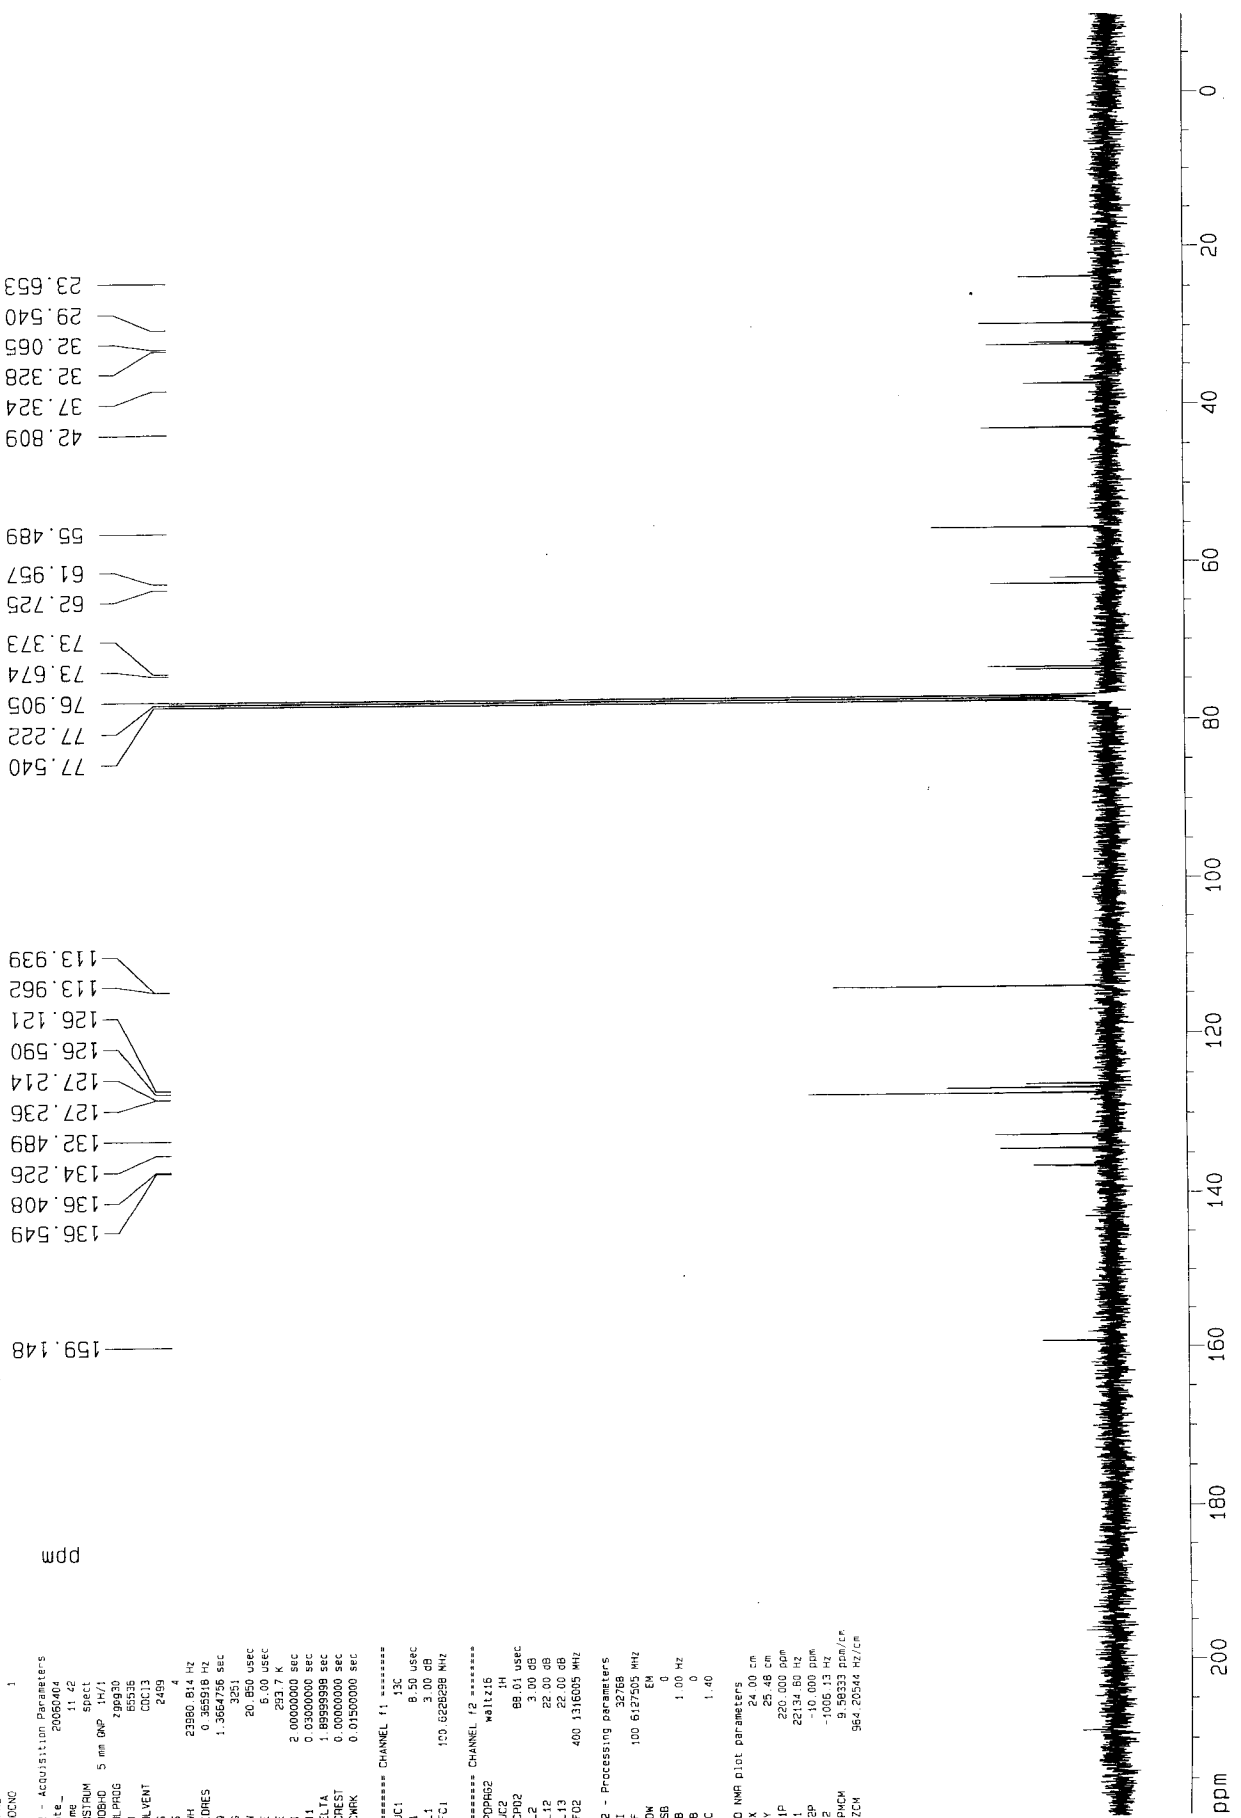



Citronellene, Me2AlCl

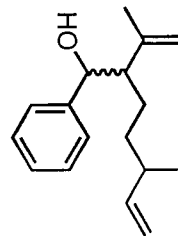

Current Data Parameters  
 NAME 1078-121418  
 EXPNO 1  
 PROCNO 1

F2 - Acquisition Parameters  
 Date\_ 20080217  
 Time 12:26  
 INSTRUM spect  
 PROBRHD 5 mm QNP 1H/1  
 PULPROG zg30  
 TO 65536  
 SOLVENT CDCl3  
 NS 8  
 DS 1  
 SWH 8278.146 Hz  
 FIDRES 0.165314 Hz  
 AQ 0.156214 sec  
 RG 313929.5  
 DW 60.400 usec  
 DE 6.00 usec  
 TE 299.4 K  
 D1 1.0000000 sec  
 MCREST 0.0000000 sec  
 MCNKRK 0.0150000 sec

\*\*\*\*\* CHANNEL f1 \*\*\*\*\*  
 NUC1 1H  
 P1 9.89 usec  
 PL1 3.00 dB  
 SFO1 400.1362710 MHz

F2 - Processing parameters  
 SI 32768  
 SF 400.1300654 MHz  
 KW EM  
 SSB 0  
 LB 0.30 Hz  
 GB 0  
 PC 1.00

10 MHz plot parameters  
 CX 24.00 cm  
 CY 7.58 cm  
 F1 10.500 ppm  
 F2 4201.38 Hz  
 F3 -0.500 ppm  
 PRGCM 0.28107 Hz  
 PRCM 0.28107 Hz/cm  
 HCCH 183.39351 Hz/cm

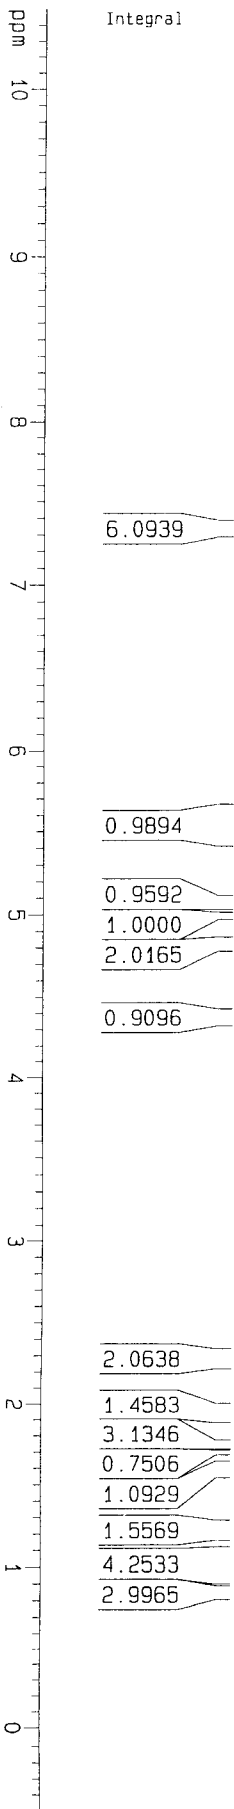

Wey-8-84 H-pdt

H-pdt

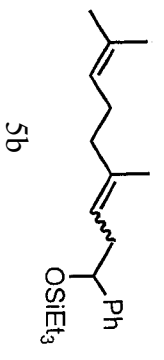

Current Data Parameters  
 NAME hcy8-84-h-pdt  
 EXPNO 1  
 PROCNO 1

F2 - Acquisition Parameters  
 Date\_ 20060108  
 Time 12:01  
 INSTRUM spect  
 PROBRD Sma BBD BB-1  
 PULPROG zg30  
 TD 2930  
 SOLVENT CDCl<sub>3</sub>  
 NS 4  
 DS 2  
 SMH 8278.14 Hz  
 FIDRES 0.12634 Hz  
 AQ 3.3564243 sec  
 RG 32  
 DW 60.400 usec  
 DE 6.00 usec  
 TE 300.0 K  
 D1 1.00000000 sec

\*\*\*\*\* CHANNEL f1 \*\*\*\*\*  
 NUC1 1H  
 P1 7.50 usec  
 PL 0.00 dB  
 SFO1 400.1264710 MHz

F2 - Processing parameters  
 SI 32768  
 SF 400.130016 MHz  
 WDW EM  
 SSB 0  
 LB 0.30 Hz  
 GB 0  
 PC 1.00

10 NMR Plot Parameters  
 CX 24.00 cm  
 F1P 14.640 Dm  
 F1 4201.36 Hz  
 F2P -0.400 Dm  
 F2 -200.07 Hz  
 PPMACK 0.45833 ppm/cm  
 HZCM 183.39291 Hz/cm

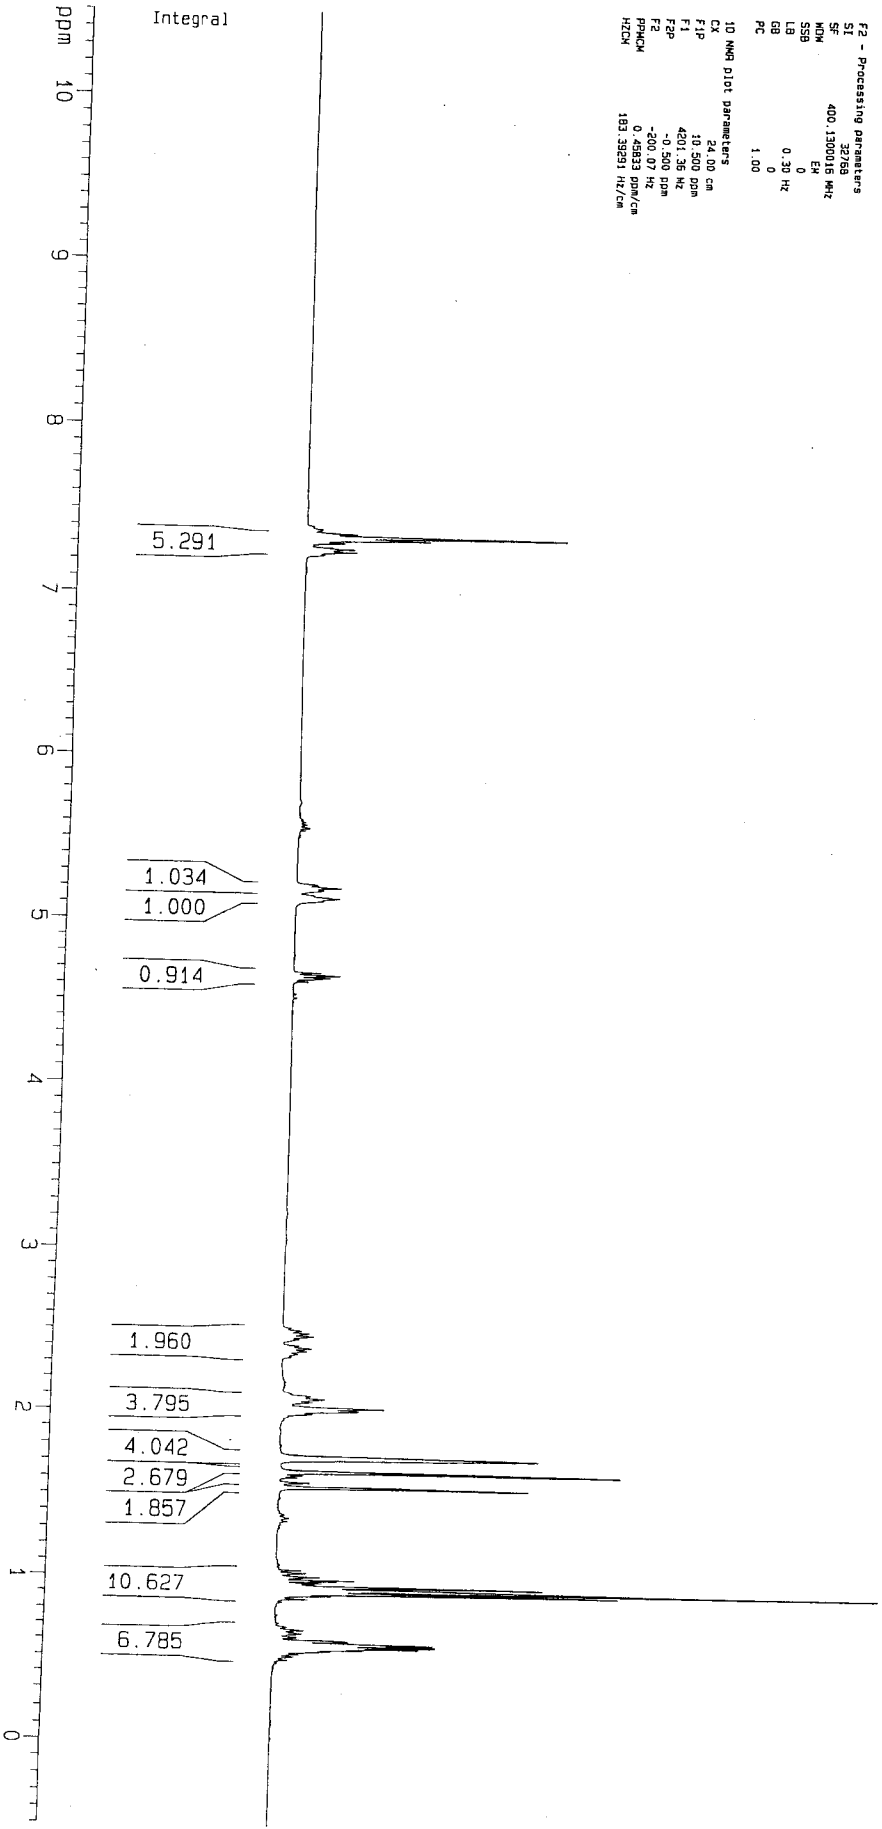

Current Data Parameters  
 NAME he9-844-pot  
 EXNO 2  
 PROCNO 1

F2 - Acquisition Parameters  
 Date\_ 20060106  
 Time 12:05  
 INSTRUM spect  
 PULPROG zgpg30  
 F1 125.000 MHz  
 F2 100.625 MHz  
 TO 2.0000000 sec  
 SOLVENT CDCl3  
 NS 59  
 DS 4  
 SMH 24675.621 Hz  
 FIDRES 0.379572 Hz  
 AQ 1.3132356 sec  
 RG 1024  
 DM 20.100 usec  
 DE 6.00 usec  
 TE 300.0 K  
 D1 0.0300000 sec  
 d12 0.0002000 sec

\*\*\*\*\* CHANNEL f1 \*\*\*\*\*  
 NUCl 13C  
 P1 15.25 usec  
 PL1 3.00 dB  
 SF01 100.627959 MHz

\*\*\*\*\* CHANNEL f2 \*\*\*\*\*  
 GRPRG2 wa1216  
 NUCl 1H  
 PCPD2 107.50 usec  
 P1 0.00 usec  
 PL1 0.00 dB  
 PL2 24.00 dB  
 PL3 24.00 dB  
 SF02 400.130003 MHz

F2 - Processing parameters  
 SI 32768  
 SF 100.612529 MHz  
 MDW 0  
 SSB 0  
 LB 1.00 Hz  
 GB 0  
 BB 0  
 PC 1.40

1D NMR P104 parameters  
 C 24.00 cm  
 F1 220.000 ppm  
 F1 22134.80 Hz  
 F2 -100.625 ppm  
 PPM/CM 9.86333 Hz/cm  
 HZ/CM 984.20351 Hz/cm

ppm

- 145.817
- 145.763
- 137.192
- 131.479
- 128.228
- 128.099
- 128.042
- 127.035
- 126.998
- 126.132
- 126.083
- 126.032
- 124.599
- 124.536
- 121.745
- 120.676
- 77.531
- 77.213
- 76.896
- 75.518
- 75.330
- 40.034
- 39.837
- 39.686
- 32.284
- 26.831
- 26.716
- 25.916
- 25.893
- 23.638
- 17.841
- 17.819
- 16.343
- 7.037
- 6.978
- 6.950
- 5.160
- 5.017
- 4.993

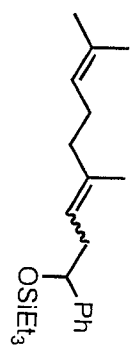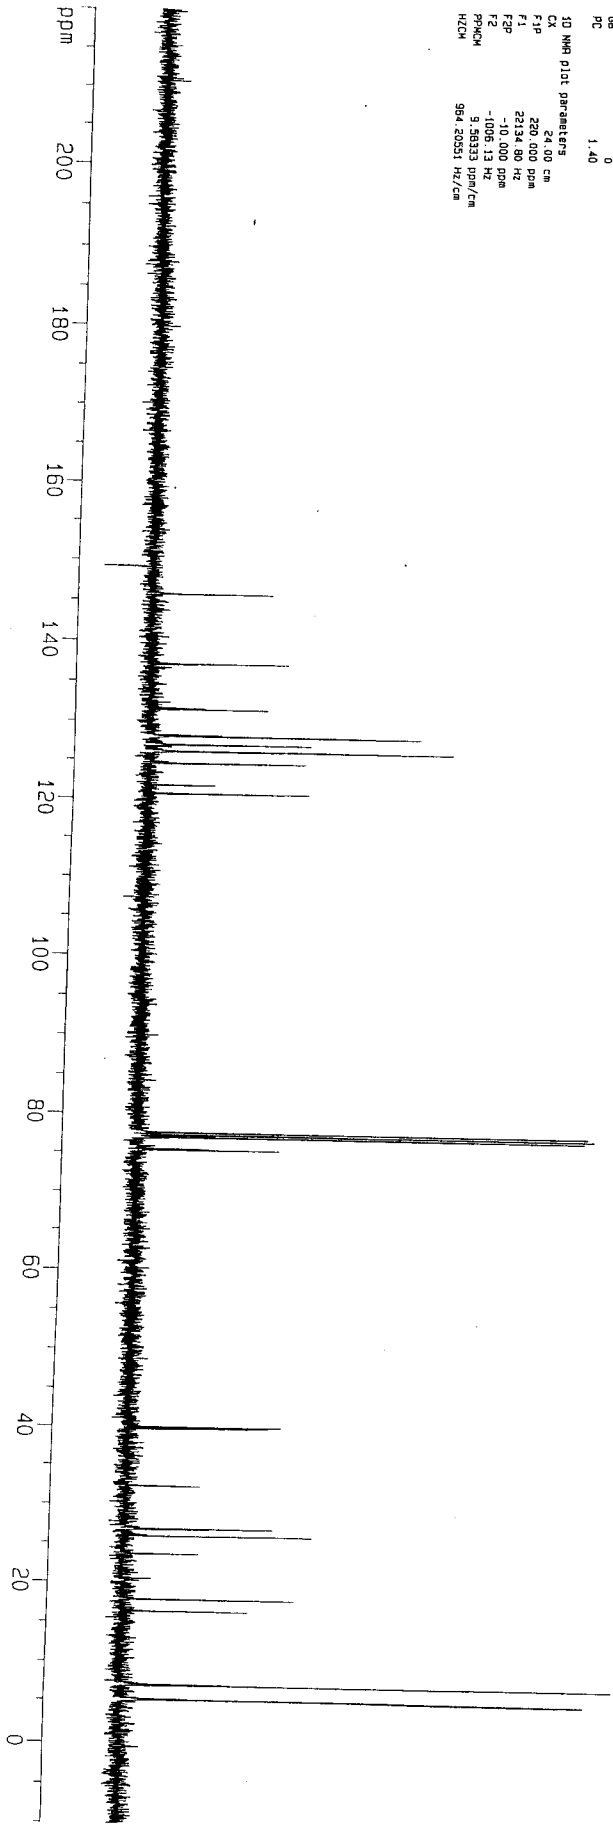

8-8-12

TES deprotection, H-pdt

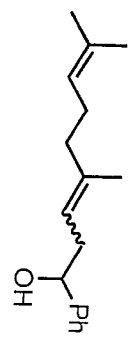

5b (TES deprotected)

Current Data Parameters  
 MAKE ncy8-84de-p  
 EXPNO 1  
 PROCNO 1

F2 - Acquisition Parameters  
 Date\_ 20060417  
 Time 13.39  
 INSTRUM spect  
 PROBRW 5mm BB1 B9-1  
 PULPROG zg30  
 TO 65536  
 SOLVENT CDCl3  
 NS 3  
 DS 2  
 SWH 8278.146 Hz  
 FWHZ 0.128314 Hz  
 AQ 3.594249 sec  
 RG 500.0  
 DW 50.00 usec  
 DE 6.00 usec  
 TE 300.0 K  
 D1 1.00000000 sec

\*\*\*\*\* CHANNEL f1 \*\*\*\*\*  
 NUC1 H  
 P1 7.90 usec  
 PL1 0.00 dB  
 SFO1 400.1324710 MHz

F2 - Processing parameters  
 SI 32768  
 SF 400.130044 MHz  
 NHM 0  
 SSB 0  
 LB 0.30 Hz  
 GB 0  
 PC 1.00

10 NMR plot parameters  
 EX 24.00 cm  
 F1P 10.500 ppm  
 F1 4201.35 Hz  
 F2P -0.500 ppm  
 F2 4200.07 Hz  
 SFOCM 0.45853 ppm/cm  
 HZCM 183.38291 Hz/cm

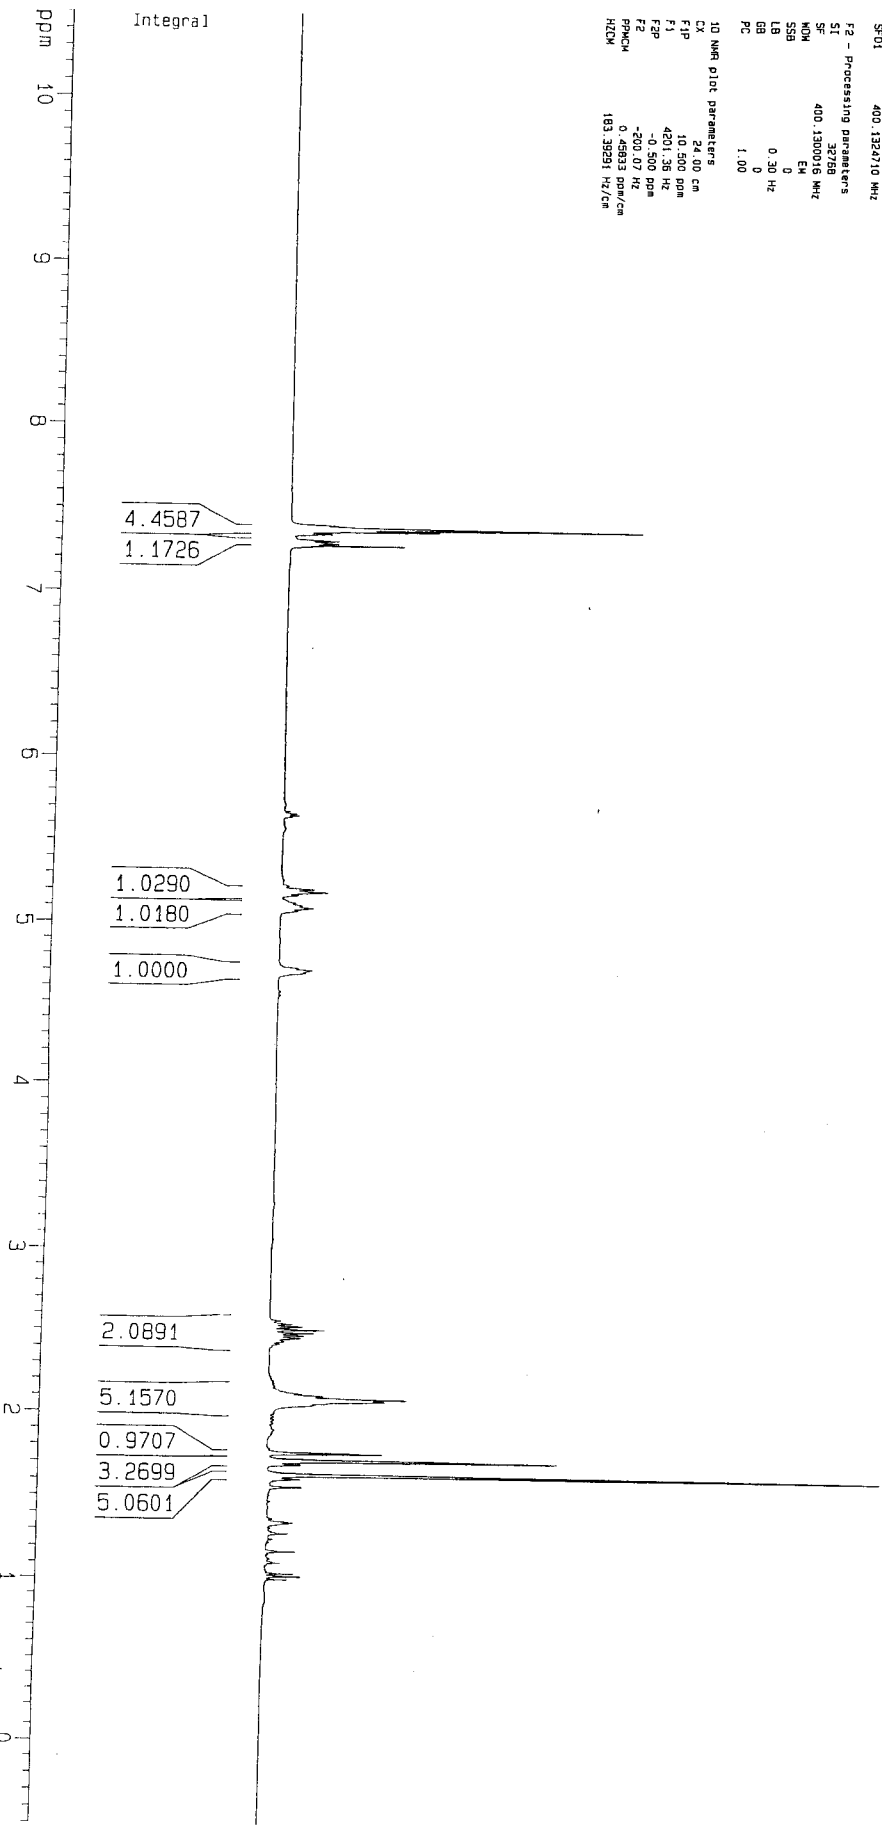

Supplement: NIHMS308266-supplement-Supporting_Information.pdf [file NIHMS308266-supplement-Supporting_Information.pdf]
